# Supplementary material for: Insecticide resistance is driven by distinct metabolic mechanisms across the lifespan of the major malaria vector Anopheles arabiensis
Source: Research Square preprint supplement (doi:10.21203/rs.3.rs-8682736/v1), 2026-02-02
Supplement: Supplementary file 1 [file 1f2a9d419b61b3c03d2b4333.xlsx]

## Sheet: Sheet1
Sample	Phenotype	Raw reads (forward and reverse)	Reads after trimming and filtering (%)	Mapped reads (%)	Counts after DESeq2
MZ_1	2d_unexposed	370076056	365405386 (98.74)	172660114 (94.5)	159203678
MZ_2	2d_unexposed	354299912	349467070 (98.64)	165086119 (94.5)	151790568
MZ_4	2d_resistant	172479274	170107114 (98.62)	80406203 (94.5)	73149370
MZ_6	2d_resistant	171657268	169344162 (98.66)	79908000 (94.3)	73320943
MZ_8	6d_unexposed	193804446	191078680 (98.59)	88600797 (92.7)	79573283
MZ_10	6d_resistant	391965580	386939056 (98.72)	180403401 (93.25)	162076920
MZ_11	6d_resistant	217909482	215183460 (98.75)	99993282 (92.94)	89049284
MZ_12	6d_resistant	426170576	420773628 (98.73)	196167244 (93.24)	178492654
MZ_13	11d_unexposed	201319610	198728156 (98.71)	91180691 (91.8)	81663196
MZ_14	11d_unexposed	442741666	437575782 (98.83)	201689480 (92.18)	181677105
MZ_15	11d_unexposed	483368912	476887264 (98.66)	220496865 (92.4)	198367021
MZ_16	11d_resistant	465446348	459717984 (98.77)	212302404 (92.4)	190866827
MZ_17	11d_resistant	357273064	352229618 (98.59)	161240050 (91.5)	144607065
MZ_18	11d_resistant	365924204	361978006 (98.92)	180989003 (92.5)	152054038
MZ_19	2d_moz	449290964	443878804 (98.80)	207500945 (93.5)	188635221
MZ_20	2d_moz	352417034	348239646 (98.81)	162137019 (93.1)	146471854
MZ_21	2d_moz	500990278	494239198 (98.65)	231638516 (93.74)	210921856
MZ_25	6d_moz	401987312	397041104 (98.77)	182998003 (92.18)	162939899
MZ_26	6d_moz	208628046	206248390 (98.86)	95271932 (92.3)	85437643
MZ_27	6d_moz	428445456	423234544 (98.78)	194995711 (92.15)	173536315
MZ_31	11d_moz	191824568	189519458 (98.80)	87478006 (92.32)	77960910
MZ_32	11d_moz	190744430	188262498 (98.70)	86835515 (92.25)	77039225
MZ_34	11d_moz	391310460	386369722 (98.73)	177807950 (92.4)	157737486
MZ_37	2d_unexposed	187302508	185007628 (98.77)	86216140 (93.2)	73590275
MZ_43	3d_resistant	225338144	222403846 (98.70)	103699989 (93.25)	93577235
MZ_44	6d_unexposed	294815232	291112476 (98.74)	133751569 (91.9)	119867782
MZ_47	6d_unexposed	576612318	569485502 (98.76)	266587869 (93.62)	243027428
*moz = susceptible Moz colony
*d = days old
