# Supplementary material for: Insecticide resistance is driven by distinct metabolic mechanisms across the lifespan of the major malaria vector Anopheles arabiensis
Source: Research Square preprint supplement (doi:10.21203/rs.3.rs-8682736/v1), 2026-02-02
Supplement: Supplementary file 2 [file 3cab5c446a04674017775f35.xlsx]

## Sheet: 2d_RvM(b)
gene	baseMean	log2FoldChange	Fold change	lfcSE	pvalue	padj	padj < 0.01	fold change >2	Up or down regulated	Product Description (vectorbase search)
AARA21_003243	426.52	13.0356	8396.65	2.71984	1.62835e-12	6.18054e-11	1	1	up	uncharacterized LOC120901597, transcript variant X1
AARA21_003879	213.127	11.8725	3749.57	2.39472	1.44569e-16	1.67583e-14	1	1	up	uncharacterized LOC120898172, transcript variant X3
AARA21_013260	136.49	11.7705	3493.68	2.75783	2.04351e-10	4.0328e-09	1	1	up	uncharacterized LOC120901660
AARA21_008014	185.173	7.42916	172.345	1.73037	3.34987e-07	2.5482e-06	1	1	up	heat shock protein 70 A1-like
AARA21_002775	10.538	7.2934	156.868	1.67492	3.50828e-07	2.64756e-06	1	1	up	tRNA-Gly
AARA21_011216	1148.22	6.89975	119.407	1.32774	4.70589e-09	6.14104e-08	1	1	up	heat shock protein 70 A1-like
AARA21_003971	17.9498	8.82166	452.463	2.48211	6.76959e-09	8.43217e-08	1	1	up	microfibril-associated glycoprotein 4-like
AARA21_010163	28.7392	8.40169	338.191	1.49652	4.87311e-10	8.48475e-09	1	1	up	uncharacterized LOC120894857
AARA21_014133	65.1042	6.5321	92.546	0.809021	3.84475e-17	5.15317e-15	1	1	up	elongation of very long chain fatty acids protein AAEL008004
AARA21_009205	5.94154	7.88868	236.989	2.55833	1.35768e-06	8.76093e-06	1	1	up	segmentation protein fushi tarazu
AARA21_000187	407.276	7.58465	191.959	1.12195	4.35678e-13	1.9879e-11	1	1	up	beta-1,3-glucan-binding protein-like
AARA21_006274	1241.22	7.46788	177.034	0.849405	5.59519e-20	1.38449e-17	1	1	up	uncharacterized protein K02A2.6-like
AARA21_001165	1259.17	7.3414	162.174	1.3313	6.332e-10	1.06781e-08	1	1	up	LOC120908218
AARA21_002274	42.2	7.03295	130.957	1.05641	5.34303e-11	1.26144e-09	1	1	up	LOC120907516
AARA21_006846	49.7224	6.97313	125.638	2.55035	1.55701e-05	7.61461e-05	1	1	up	uncharacterized LOC120894888
AARA21_010604	5.5449	5.55844	47.1255	1.36722	6.69887e-06	3.58436e-05	1	1	up	U12 minor spliceosomal RNA
AARA21_006941	47.0627	5.50975	45.5618	0.718749	1.09057e-15	9.91572e-14	1	1	up	tRNA-Ala
AARA21_005133	837.745	6.88632	118.301	0.742649	7.87276e-22	2.81386e-19	1	1	up	antigen 5 like allergen Cul n 1-like
AARA21_010975	11170.9	6.72576	105.841	0.715846	2.58535e-22	1.03955e-19	1	1	up	probable cytochrome P450 6a14
AARA21_011961	11.9104	5.40353	42.3278	1.00212	4.94876e-09	6.41246e-08	1	1	up	mitochondrial sodium/calcium exchanger protein-like
AARA21_011910	17.8853	5.15518	35.6339	1.14192	2.63095e-07	2.06543e-06	1	1	up	gustatory receptor for bitter taste 66a-like
AARA21_005140	7.265	5.14266	35.326	1.66583	0.000135364	0.000512124	1	1	up	mitochondrial sodium/calcium exchanger protein-like
AARA21_005864	1307.82	5.03758	32.8445	0.703116	2.96912e-14	1.93927e-12	1	1	up	stress-activated protein kinase JNK-like, transcript variant X1
AARA21_000475	146.87	4.88682	29.5855	0.580564	2.08127e-18	3.93819e-16	1	1	up	odorant receptor 67d-like
AARA21_005983	175.923	6.70021	103.984	1.50353	2.26561e-07	1.80624e-06	1	1	up	probable chitinase 2
AARA21_012272	4.34156	4.80894	28.0309	1.87547	0.000383473	0.00127629	1	1	up	leucine-rich repeat transmembrane neuronal protein 2-like
AARA21_002626	3.34878	4.80525	27.9592	1.92083	0.000445588	0.00145769	1	1	up	tRNA-Ser
AARA21_008682	15497.7	6.46753	88.4951	0.488428	2.01283e-41	8.63302e-38	1	1	up	uncharacterized LOC120893869
AARA21_011527	10101.5	4.75081	26.9237	0.66568	5.24096e-14	3.22461e-12	1	1	up	chymotrypsin-2
AARA21_007025	5.69815	4.74723	26.857	1.93463	0.000543321	0.00173343	1	1	up	odorant receptor 22c-like
AARA21_003440	21.723	4.74443	26.8049	0.96198	3.82407e-08	3.78494e-07	1	1	up	tRNA-Val
AARA21_010250	73.9653	6.42765	86.0824	0.968068	1.46139e-12	5.61305e-11	1	1	up	DE-cadherin-like
AARA21_010324	13.694	4.5604	23.5948	1.29726	1.86832e-05	8.94664e-05	1	1	up	tRNA-Lys
AARA21_009167	106.545	4.53487	23.1809	0.593948	1.22697e-15	1.08879e-13	1	1	up	tetraspanin-9-like
AARA21_010914	29.2643	4.53317	23.1537	1.59148	0.000124498	0.000476336	1	1	up	tRNA-Ala
AARA21_015365	211.345	6.41718	85.4599	1.55417	1.26484e-06	8.24872e-06	1	1	up	acrosin-like
AARA21_006797	225860	4.44685	21.8089	0.548749	3.71413e-17	5.0305e-15	1	1	up	12S ribosomal RNA
AARA21_014414	2970.53	4.41122	21.2769	0.500956	8.36077e-20	1.95597e-17	1	1	up	26S proteasome regulatory subunit 6A-B-like, transcript variant X1
AARA21_010367	20.1438	6.26878	77.1065	1.22985	3.81881e-08	3.78265e-07	1	1	up	uncharacterized LOC120893370
AARA21_010987	4.06142	4.39686	21.0662	2.12502	0.0011553	0.00337846	1	1	up	ras-related protein Rab-36
AARA21_010122	17.3211	4.38784	20.9349	0.950069	1.84748e-07	1.5093e-06	1	1	up	myoglobin-like, transcript variant X2
AARA21_009936	2.81416	4.35631	20.4823	2.15008	0.00106007	0.00313851	1	1	up	large subunit ribosomal RNA
AARA21_007022	466.946	6.15021	71.023	0.609284	2.88177e-25	1.85398e-22	1	1	up	beta-1,3-glucan-binding protein-like
AARA21_012877	214.625	5.84856	57.6226	0.957064	4.06179e-11	9.91976e-10	1	1	up	cyclin-dependent kinase inhibitor 1C-like
AARA21_008838	1091.65	4.20048	18.3853	0.803514	8.97053e-09	1.07571e-07	1	1	up	protein lethal(2)essential for life-like
AARA21_000872	5.33787	5.76743	54.4713	2.5164	0.000106899	0.000414173	1	1	up	LOC120894074
AARA21_011396	292.773	5.74293	53.5542	1.25533	1.42583e-07	1.19519e-06	1	1	up	general odorant-binding protein 56d-like
AARA21_015189	62.509	4.14361	17.6746	0.771127	3.62603e-09	4.906e-08	1	1	up	ionotropic receptor 75a-like
AARA21_008287	3964.09	4.14251	17.6612	0.940012	5.1374e-07	3.70532e-06	1	1	up	collagenase-like
AARA21_012062	5.60676	5.68947	51.606	1.5539	1.01962e-05	5.23732e-05	1	1	up	LOC120907359
AARA21_011249	8.19852	4.11885	17.3739	1.17585	2.10835e-05	9.91888e-05	1	1	up	large subunit ribosomal RNA
AARA21_002990	4.0858	4.1185	17.3697	2.17246	0.00223873	0.00600997	1	1	up	tRNA-Ile
AARA21_000477	33.6791	5.59264	48.256	0.793456	9.37936e-14	5.23954e-12	1	1	up	gustatory receptor for bitter taste 66a-like
AARA21_006719	2.94031	4.10594	17.2192	2.10888	0.00175256	0.00487466	1	1	up	sodium channel protein Nach-like
AARA21_004637	2.94717	4.05649	16.6389	1.62428	0.000913461	0.00275129	1	1	up	large subunit ribosomal RNA
AARA21_007362	19.8323	4.01972	16.2202	1.06316	7.77068e-06	4.1028e-05	1	1	up	tRNA-Thr
AARA21_008151	83.6302	5.48094	44.6609	2.27577	0.000345475	0.00116673	1	1	up	phenoloxidase-activating factor 3-like, transcript variant X1
AARA21_006239	102407	3.89048	14.8303	0.541107	4.13371e-14	2.62012e-12	1	1	up	dnaJ protein homolog 1
AARA21_009453	21.7515	3.88413	14.7652	0.784472	4.04311e-08	3.97119e-07	1	1	up	odorant receptor Or1-like
AARA21_002412	3514.69	3.8615	14.5354	0.999063	5.5056e-06	3.00681e-05	1	1	up	collagenase-like
AARA21_009206	18.6687	5.44673	43.6144	1.03646	6.38867e-09	8.02764e-08	1	1	up	phospholipase A1-like
AARA21_009162	679.466	3.83612	14.282	0.429397	2.7573e-20	7.39128e-18	1	1	up	ecdysone-induced protein 74EF-like, transcript variant X2
AARA21_009935	16.4764	5.34514	40.6487	1.12591	2.98718e-07	2.31499e-06	1	1	up	LOC120907409
AARA21_000069	27.9954	3.81779	14.1016	0.971477	4.42297e-06	2.48517e-05	1	1	up	5.8S ribosomal RNA
AARA21_011850	728.422	3.81546	14.0789	0.827579	2.21922e-07	1.7769e-06	1	1	up	protein lethal(2)essential for life-like
AARA21_010323	1285.69	3.80499	13.9771	0.518502	1.33764e-14	9.50718e-13	1	1	up	Golgi-associated plant pathogenesis-related protein 1-like
AARA21_006828	394.107	5.30198	39.4507	0.792064	8.48266e-13	3.54371e-11	1	1	up	uncharacterized LOC120901524
AARA21_014719	9.90416	5.01254	32.2794	1.54727	0.000136247	0.000514808	1	1	up	uncharacterized LOC120903544
AARA21_012642	12539.7	3.78548	13.7893	0.593985	1.02202e-11	3.05112e-10	1	1	up	heat shock protein 83-like
AARA21_002873	1675.66	3.7374	13.3374	0.508064	1.30621e-14	9.44217e-13	1	1	up	probable nuclear hormone receptor HR3, transcript variant X17
AARA21_005820	17437	3.72236	13.199	0.5735	5.6539e-12	1.82103e-10	1	1	up	regucalcin-like
AARA21_009613	5.98023	3.71565	13.1378	2.0645	0.00255217	0.00673268	1	1	up	odorant receptor 22c-like
AARA21_013612	13.3676	3.70925	13.0796	0.844742	6.26361e-07	4.38726e-06	1	1	up	interferon-related developmental regulator 2-like
AARA21_012567	2.72634e+07	3.7055	13.0457	0.470787	2.9227e-16	3.05743e-14	1	1	up	16S ribosomal RNA
AARA21_005494	132.119	4.97989	31.557	2.09393	0.000401783	0.00133104	1	1	up	adult cuticle protein 1-like
AARA21_013683	10819.2	3.66532	12.6873	0.36693	1.2147e-24	6.79548e-22	1	1	up	lipopolysaccharide-induced tumor necrosis factor-alpha factor homolog
AARA21_000500	1294.54	4.94607	30.8259	1.03971	6.74193e-08	6.28156e-07	1	1	up	uncharacterized LOC120904437
AARA21_008539	2500.52	3.6411	12.4762	0.492019	9.45493e-15	7.11442e-13	1	1	up	zinc finger protein 263-like
AARA21_003820	30.9596	3.62134	12.3064	0.874245	1.72277e-06	1.08395e-05	1	1	up	lipase member H
AARA21_000362	597.765	3.61584	12.2596	0.553416	4.53473e-12	1.49611e-10	1	1	up	paternally-expressed gene 3 protein
AARA21_013319	632.173	4.89004	29.6516	1.59656	8.47221e-05	0.000337498	1	1	up	adult cuticle protein 1-like
AARA21_003850	425.858	4.82173	28.2803	0.515272	4.12487e-22	1.60833e-19	1	1	up	transcriptional regulator ovo-like
AARA21_001000	1821.03	3.5771	11.9348	0.411258	2.47316e-19	5.21675e-17	1	1	up	5-hydroxytryptamine receptor-like, transcript variant X1
AARA21_014449	2230.37	3.56181	11.809	0.585915	7.79252e-11	1.75598e-09	1	1	up	general odorant-binding protein 84a, transcript variant X1
AARA21_002150	65.3186	4.75551	27.0117	1.40231	3.56355e-05	0.000157298	1	1	up	DE-cadherin-like
AARA21_011634	7.78659	4.67011	25.4591	1.38075	4.72406e-05	0.000202412	1	1	up	general odorant-binding protein 99b-like
AARA21_002434	2709.37	3.51378	11.4223	0.532814	3.04752e-12	1.06555e-10	1	1	up	probable nuclear hormone receptor HR38, transcript variant X5
AARA21_006079	4.41795	3.50033	11.3163	2.4451	0.00447459	0.0110657	0	1		transmembrane protease serine 9-like
AARA21_006097	22.8924	4.62458	24.6682	1.06475	9.1498e-07	6.1692e-06	1	1	up	uncharacterized LOC120897840
AARA21_002211	11847.4	3.47845	11.1459	1.22121	0.000176741	0.000642226	1	1	up	trypsin-7
AARA21_004631	56528	3.4551	10.9671	0.364922	2.15139e-22	9.2273e-20	1	1	up	dendritic arbor reduction protein 1-like
AARA21_004555	6.0608	3.44099	10.8603	1.29783	0.000422204	0.00138974	1	1	up	E3 ubiquitin-protein ligase synoviolin A-like, transcript variant X2
AARA21_006280	3.4447	3.43377	10.8061	1.55748	0.00176163	0.00489632	1	1	up	tRNA-Ala
AARA21_005605	126.916	4.5617	23.6162	0.687729	2.16939e-12	8.09089e-11	1	1	up	uncharacterized LOC120905952
AARA21_014141	1655.65	4.52551	23.031	1.18608	5.90062e-06	3.19677e-05	1	1	up	cuticle protein 10.6-like
AARA21_003594	547.211	4.51027	22.789	0.748792	6.99487e-11	1.5958e-09	1	1	up	uncharacterized LOC120900792
AARA21_007334	4.82539	3.39021	10.4847	0.910045	1.56533e-05	7.64785e-05	1	1	up	large subunit ribosomal RNA
AARA21_011986	790.756	4.50893	22.7679	1.11044	1.76552e-06	1.10652e-05	1	1	up	sorbitol dehydrogenase-like
AARA21_013920	54.4449	3.30588	9.88937	0.596288	1.83958e-09	2.7148e-08	1	1	up	astacin-like
AARA21_006876	3540.73	3.29289	9.80076	0.38982	2.20084e-18	4.10409e-16	1	1	up	BTB/POZ domain-containing protein 9-like
AARA21_012215	30.4568	4.47827	22.2891	0.779325	4.97105e-10	8.60868e-09	1	1	up	uncharacterized LOC120906542
AARA21_015370	3.71437	4.40912	21.2461	2.72045	0.00198251	0.00541017	1	1	up	astacin-like, transcript variant X1
AARA21_008847	208.765	3.28483	9.74616	0.574733	7.08181e-10	1.17728e-08	1	1	up	protein G12
AARA21_003572	33.3781	4.40628	21.2043	0.650668	5.85026e-13	2.52175e-11	1	1	up	uncharacterized LOC120893233
AARA21_011278	21816.4	3.26705	9.62678	0.421653	7.54127e-16	7.03141e-14	1	1	up	neuronal acetylcholine receptor subunit alpha-7-like
AARA21_015164	6141.06	4.34499	20.3222	0.470039	1.29407e-21	4.26945e-19	1	1	up	probable cytochrome P450 6a14
AARA21_008470	3644.96	3.24086	9.45361	0.571766	1.05909e-09	1.67002e-08	1	1	up	general odorant-binding protein lush-like
AARA21_005059	9055.68	3.24001	9.44798	0.459447	1.39792e-13	7.43268e-12	1	1	up	PE-PGRS family protein PE_PGRS16
AARA21_014830	127.633	4.34475	20.3189	1.09754	2.99453e-06	1.76746e-05	1	1	up	uncharacterized LOC120906015
AARA21_006725	10004.6	3.21714	9.29939	0.460408	2.20014e-13	1.11453e-11	1	1	up	cyclic nucleotide-gated cation channel alpha-3, transcript variant X1
AARA21_000497	329.817	3.21666	9.29633	0.617623	1.27318e-08	1.44462e-07	1	1	up	general odorant-binding protein 72-like
AARA21_005959	11.3593	4.34274	20.2906	2.29679	0.00158009	0.00444684	1	1	up	uncharacterized LOC120897270
AARA21_012175	18872	3.18074	9.06775	0.399773	1.44079e-16	1.67583e-14	1	1	up	PH domain-containing protein DDB_G0275795-like
AARA21_008259	31.6645	3.18001	9.06313	0.549799	4.75912e-10	8.33137e-09	1	1	up	radial spoke head protein 9 homolog
AARA21_012207	4213.4	4.29804	19.6715	0.925343	1.50559e-07	1.25469e-06	1	1	up	sorbitol dehydrogenase-like
AARA21_001261	7.79284	4.28474	19.491	1.25689	4.44531e-05	0.000191489	1	1	up	tRNA-Ser
AARA21_009604	10.1401	4.19329	18.2939	1.35671	0.000123493	0.000473192	1	1	up	uncharacterized LOC120904340
AARA21_003378	1795.44	3.15073	8.88107	0.387712	3.51985e-17	4.81808e-15	1	1	up	helix-loop-helix protein delilah, transcript variant X2
AARA21_012027	4.86844	3.15036	8.87875	1.29509	0.000711057	0.00220197	1	1	up	tRNA-Gly
AARA21_001975	7.90918	3.14645	8.85473	0.800336	5.82416e-06	3.16433e-05	1	1	up	large subunit ribosomal RNA
AARA21_003601	208.676	4.19131	18.2687	0.964016	5.65878e-07	4.01608e-06	1	1	up	probable chitinase 10
AARA21_006502	34.711	3.13817	8.80405	0.584377	4.85218e-09	6.30636e-08	1	1	up	large subunit ribosomal RNA
AARA21_006591	193.451	4.18085	18.1368	0.866286	5.45079e-08	5.18991e-07	1	1	up	venom serine protease inhibitor-like
AARA21_009527	68.8082	3.13072	8.75874	0.52085	1.28191e-10	2.69076e-09	1	1	up	fas-binding factor 1-like
AARA21_003603	30.9456	3.10845	8.62454	0.646625	8.89133e-08	7.95029e-07	1	1	up	farnesol dehydrogenase-like
AARA21_007358	18.142	4.14231	17.6587	0.704134	2.19273e-10	4.28331e-09	1	1	up	tRNA-Gln
AARA21_000142	4619.22	3.0684	8.38843	0.361461	1.75386e-18	3.3682e-16	1	1	up	zinc finger protein 1, transcript variant X2
AARA21_003997	194.632	3.03853	8.21652	0.549339	2.29379e-09	3.30506e-08	1	1	up	alpha-amylase 2-like
AARA21_012511	2270.59	4.11921	17.3782	1.02326	3.05991e-06	1.80192e-05	1	1	up	uncharacterized LOC120901413
AARA21_002012	1175.49	4.11234	17.2957	0.700542	2.22867e-10	4.33177e-09	1	1	up	xanthine dehydrogenase-like
AARA21_006387	5.81819	2.97527	7.86402	1.02846	0.000236639	0.000831792	1	1	up	large subunit ribosomal RNA
AARA21_001434	1512.56	2.96641	7.81586	1.18112	0.000543945	0.00173456	1	1	up	ejaculatory bulb-specific protein 3-like
AARA21_001318	15560	2.95938	7.7779	0.415665	9.40649e-14	5.23954e-12	1	1	up	glutamate-gated chloride channel, transcript variant X5
AARA21_009875	18074.6	2.95728	7.76659	0.357976	1.27974e-17	2.0081e-15	1	1	up	potassium voltage-gated channel protein Shab, transcript variant X2
AARA21_003468	223.232	4.03245	16.3639	0.667216	9.68084e-11	2.11124e-09	1	1	up	uncharacterized LOC120895434, transcript variant X7
AARA21_010965	54.344	4.02571	16.2877	1.31657	8.17305e-05	0.000326897	1	1	up	uncharacterized LOC120904381, transcript variant X1
AARA21_006895	18474.8	2.94155	7.68237	0.417912	1.70004e-13	8.89202e-12	1	1	up	disintegrin and metalloproteinase domain-containing protein 11, transcript variant X3
AARA21_001880	1994.85	2.93835	7.66533	0.570084	1.93457e-08	2.08477e-07	1	1	up	general odorant-binding protein 72-like
AARA21_008091	30.8345	2.93814	7.66423	0.694036	1.45428e-06	9.32347e-06	1	1	up	large subunit ribosomal RNA
AARA21_007315	30273.4	2.93495	7.6473	0.396129	1.13401e-14	8.24368e-13	1	1	up	potassium voltage-gated channel protein Shaker, transcript variant X1
AARA21_000086	29.0598	2.92524	7.59598	0.664702	7.63915e-07	5.24789e-06	1	1	up	cytochrome c oxidase subunit 6A2, mitochondrial-like
AARA21_008651	4918.54	2.9223	7.58056	0.418061	2.35108e-13	1.17253e-11	1	1	up	acetylcholine receptor subunit alpha-like 1
AARA21_008037	24.4694	3.97689	15.7457	1.65103	0.00047854	0.00155211	1	1	up	uncharacterized LOC120897859
AARA21_002280	44381.4	3.97081	15.6796	0.509372	3.96943e-16	3.95928e-14	1	1	up	ATP-binding cassette sub-family A member 3-like, transcript variant X1
AARA21_000184	7.38509	2.90044	7.46652	1.06417	0.000306134	0.00104539	1	1	up	large subunit ribosomal RNA
AARA21_000457	51.2248	3.86179	14.5383	1.24293	7.50158e-05	0.00030315	1	1	up	uncharacterized LOC120903838
AARA21_001022	135.347	2.89123	7.41903	0.387824	6.75281e-15	5.33058e-13	1	1	up	zwei Ig domain protein zig-8-like
AARA21_001218	251.362	3.84553	14.3754	0.61618	2.76606e-11	7.08982e-10	1	1	up	protein obstructor-E-like
AARA21_005451	19743.8	2.88924	7.40879	0.378024	1.88388e-15	1.63783e-13	1	1	up	dendritic arbor reduction protein 1
AARA21_002955	135.351	2.88762	7.40048	1.58852	0.00214233	0.00578862	1	1	up	prisilkin-39-like, transcript variant X1
AARA21_000438	1871.75	2.87757	7.34911	0.394528	2.1942e-14	1.48594e-12	1	1	up	secreted protein C, transcript variant X2
AARA21_012003	31644.8	2.87568	7.33948	0.401373	5.4282e-14	3.31017e-12	1	1	up	gamma-aminobutyric acid receptor subunit beta, transcript variant X6
AARA21_014509	6933.78	3.82829	14.2046	0.81707	1.51726e-07	1.26278e-06	1	1	up	brachyurin-like
AARA21_000937	1230.78	2.86836	7.30236	0.623939	3.21532e-07	2.46113e-06	1	1	up	ejaculatory bulb-specific protein 3-like, transcript variant X2
AARA21_003508	20.5965	2.85928	7.25654	1.15988	0.000681445	0.00211945	1	1	up	myrosinase-binding protein 2-like
AARA21_007030	174.345	2.84964	7.20821	0.416343	5.98995e-13	2.56055e-11	1	1	up	cell wall protein DAN4-like
AARA21_004964	14.4173	2.8494	7.207	0.87229	6.09743e-05	0.000253001	1	1	up	large subunit ribosomal RNA
AARA21_011211	431.101	2.84325	7.17633	0.549478	1.91389e-08	2.06421e-07	1	1	up	myogenic-determination protein
AARA21_014540	5787.14	2.83681	7.14436	0.413173	5.89614e-13	2.52886e-11	1	1	up	serine-rich adhesin for platelets, transcript variant X3
AARA21_007653	34.8398	3.81568	14.081	0.940771	2.37978e-06	1.44165e-05	1	1	up	LOC120894301
AARA21_003503	2031.44	3.8036	13.9636	0.40213	1.75482e-22	8.06401e-20	1	1	up	UDP-glycosyltransferase UGT5-like
AARA21_001449	17725.9	2.81948	7.0591	0.422218	2.01439e-12	7.60094e-11	1	1	up	Krueppel-like factor luna, transcript variant X6
AARA21_011796	499.39	2.81428	7.03366	0.453736	4.66206e-11	1.12546e-09	1	1	up	nose resistant to fluoxetine protein 6, transcript variant X3
AARA21_002777	53493.2	2.81406	7.03259	0.315924	4.84414e-20	1.24659e-17	1	1	up	basic-leucine zipper transcription factor A-like
AARA21_015313	204502	2.81225	7.02379	0.407846	4.9867e-13	2.23567e-11	1	1	up	cecropin-C
AARA21_012865	6797.68	2.80215	6.9748	0.522002	6.78122e-09	8.43849e-08	1	1	up	zinc finger protein jing
AARA21_012514	39.3477	2.80135	6.97092	2.07398	0.00394085	0.00986708	1	1	up	synaptic vesicle glycoprotein 2B-like, transcript variant X1
AARA21_003859	1310.61	2.79074	6.91986	0.567749	7.17663e-08	6.62898e-07	1	1	up	protein pygopus-like
AARA21_003269	25.1798	2.78337	6.8846	0.705311	4.86654e-06	2.69556e-05	1	1	up	large subunit ribosomal RNA
AARA21_005777	1181.39	2.77979	6.86753	0.401065	3.86644e-13	1.79601e-11	1	1	up	mucin-19-like, transcript variant X1
AARA21_010958	2671.31	2.77965	6.86684	0.404715	5.85997e-13	2.52175e-11	1	1	up	protein SCAI, transcript variant X1
AARA21_012322	27.4873	3.79953	13.9242	0.825868	2.51022e-07	1.97668e-06	1	1	up	glucose dehydrogenase [FAD, quinone]-like, transcript variant X1
AARA21_004969	64596	2.74615	6.70923	0.403299	9.17412e-13	3.77136e-11	1	1	up	homeobox protein prospero, transcript variant X1
AARA21_013539	6043.6	2.74416	6.69998	0.389689	1.6853e-13	8.85094e-12	1	1	up	acetylcholine receptor subunit alpha-like, transcript variant X8
AARA21_012975	175.393	3.77836	13.7215	0.813539	1.66023e-07	1.37289e-06	1	1	up	uncharacterized LOC120900100, transcript variant X4
AARA21_006273	1456.58	3.7176	13.1556	0.773456	8.46896e-08	7.63631e-07	1	1	up	uncharacterized LOC120896343
AARA21_004554	15.4816	2.7361	6.66268	1.23621	0.00127995	0.00370009	1	1	up	putative odorant receptor 83c
AARA21_007944	6.996	2.72721	6.62174	0.920697	0.000230862	0.000813389	1	1	up	large subunit ribosomal RNA
AARA21_007364	2131.99	2.72612	6.61672	0.611835	6.73941e-07	4.68989e-06	1	1	up	general odorant-binding protein 69a
AARA21_010745	7.40777	2.71955	6.58666	1.01674	0.000459129	0.0014956	1	1	up	large subunit ribosomal RNA
AARA21_005042	11551.2	2.71914	6.58481	0.543456	4.88462e-08	4.71474e-07	1	1	up	general odorant-binding protein 83a-like
AARA21_012044	2846.72	3.70219	13.0158	0.408255	8.18507e-21	2.34038e-18	1	1	up	cytochrome P450 6d3-like
AARA21_009139	5663.06	2.71785	6.57892	0.362789	6.39562e-15	5.09936e-13	1	1	up	dendritic arbor reduction protein 1, transcript variant X2
AARA21_011856	1616.27	3.70014	12.9973	0.699666	7.17826e-09	8.78807e-08	1	1	up	protein obstructor-E, transcript variant X2
AARA21_013394	62.7382	2.71613	6.5711	0.507069	6.94783e-09	8.57944e-08	1	1	up	large subunit ribosomal RNA
AARA21_005435	16645.5	2.70115	6.50319	0.334038	5.90501e-17	7.52274e-15	1	1	up	histone-lysine N-methyltransferase SETD1B-like
AARA21_007469	103651	2.6957	6.47869	0.354605	2.87108e-15	2.39884e-13	1	1	up	zinc finger protein 395
AARA21_015294	10282.5	2.68776	6.44314	0.346692	8.73137e-16	8.08249e-14	1	1	up	adenylate cyclase type 3, transcript variant X1
AARA21_003939	16426.1	2.68507	6.43112	0.359216	7.23571e-15	5.60855e-13	1	1	up	zinc finger MIZ domain-containing protein 1, transcript variant X1
AARA21_015256	3761.38	2.68295	6.42168	0.987542	0.000364113	0.00122006	1	1	up	senecionine N-oxygenase
AARA21_003517	227.404	3.67821	12.8012	0.46447	1.43043e-16	1.67583e-14	1	1	up	uncharacterized LOC120906034, transcript variant X1
AARA21_006469	99.2149	2.67356	6.37999	0.585111	3.64444e-07	2.74251e-06	1	1	up	odorant receptor Or2-like
AARA21_003364	16.9302	2.6664	6.34845	0.651992	2.80461e-06	1.66915e-05	1	1	up	large subunit ribosomal RNA
AARA21_002987	2223.82	3.66452	12.6803	0.784559	2.2561e-07	1.80082e-06	1	1	up	larval cuticle protein 1-like
AARA21_003158	25.6254	2.66219	6.32993	0.503159	9.56061e-09	1.13484e-07	1	1	up	large subunit ribosomal RNA
AARA21_010669	8209.12	2.65729	6.30848	0.411391	9.55085e-12	2.89105e-10	1	1	up	amphoterin-induced protein 2-like
AARA21_003365	40.8402	2.65643	6.30472	0.668031	4.65119e-06	2.59302e-05	1	1	up	odorant receptor Or2-like
AARA21_012292	1719.09	3.6629	12.6661	0.454464	5.05049e-17	6.56411e-15	1	1	up	amyloid-beta A4 protein
AARA21_004620	21989.4	3.63708	12.4414	0.304099	4.06213e-34	8.71125e-31	1	1	up	probable cytochrome P450 9f2
AARA21_010024	192.329	2.65293	6.28943	0.358881	1.11372e-14	8.17142e-13	1	1	up	zwei Ig domain protein zig-8-like, transcript variant X1
AARA21_009799	12561.4	3.60793	12.1926	1.17766	7.55844e-05	0.000305256	1	1	up	fibrinogen C domain-containing protein 1-like
AARA21_007723	3945.08	2.63363	6.20584	0.573062	3.66587e-07	2.75065e-06	1	1	up	zinc metalloproteinase-disintegrin-like NaMP
AARA21_006480	44.1164	2.63197	6.1987	1.7338	0.00570881	0.0136839	0	1		fibrinogen-like protein 1
AARA21_001301	65799.1	2.62865	6.18447	0.420988	4.28298e-11	1.03979e-09	1	1	up	metallo-beta-lactamase domain-containing protein 1
AARA21_015701	4843.45	2.62228	6.15721	0.326072	9.05995e-17	1.12091e-14	1	1	up	opsin-2, transcript variant X1
AARA21_010379	77.8572	3.60275	12.1489	1.36951	0.000301433	0.00103153	1	1	up	fibrinogen C domain-containing protein 1-like
AARA21_006965	10.9618	2.61224	6.11453	0.860017	0.000143392	0.000537678	1	1	up	large subunit ribosomal RNA
AARA21_005964	30444.3	2.61223	6.11448	0.415393	8.32611e-08	7.5392e-07	1	1	up	heat shock protein 83
AARA21_011391	2525.9	2.6037	6.07845	0.368753	1.60134e-13	8.44445e-12	1	1	up	protein extra-macrochaetae
AARA21_009033	6.99293	2.60123	6.06803	1.29678	0.00206457	0.00559495	1	1	up	large subunit ribosomal RNA
AARA21_006599	9823.35	3.54449	11.6681	0.671527	1.01751e-08	1.19674e-07	1	1	up	histidine-rich protein PFHRP-II
AARA21_006121	1077.6	2.59814	6.05505	0.358908	5.14517e-14	3.18283e-12	1	1	up	trace amine-associated receptor 4-like, transcript variant X1
AARA21_011807	85.3949	3.53602	11.5998	0.86458	2.36013e-06	1.43244e-05	1	1	up	phospholipase A1-like, transcript variant X1
AARA21_007333	722.163	3.48003	11.1582	0.797048	6.81366e-07	4.73388e-06	1	1	up	volume-regulated anion channel subunit LRRC8A-like
AARA21_012731	1142.89	2.58741	6.01018	0.597359	1.24844e-06	8.15412e-06	1	1	up	odorant receptor coreceptor, transcript variant X1
AARA21_011809	25.0299	3.47138	11.0915	0.731668	1.27784e-07	1.08743e-06	1	1	up	cuticle protein 16.5-like
AARA21_008898	23.645	2.57764	5.96962	0.610979	1.78318e-06	1.11651e-05	1	1	up	large subunit ribosomal RNA
AARA21_014929	353.85	2.57184	5.94567	0.423336	1.11913e-10	2.39598e-09	1	1	up	homeobox protein slou
AARA21_008455	864.65	2.56451	5.91553	0.42049	1.09635e-10	2.37087e-09	1	1	up	cysteine-rich venom protein-like, transcript variant X1
AARA21_007125	94.4133	3.46457	11.0393	1.08851	6.36805e-05	0.000262453	1	1	up	uncharacterized LOC120908841
AARA21_006681	104.01	2.55857	5.89121	1.13808	0.0012273	0.00356875	1	1	up	microfibril-associated glycoprotein 4-like
AARA21_011242	142.775	2.55179	5.86363	0.525141	9.79967e-08	8.67807e-07	1	1	up	general odorant-binding protein 72, transcript variant X1
AARA21_001300	39.5841	2.55097	5.86027	0.956895	0.000478806	0.00155223	1	1	up	odorant receptor 43a-like
AARA21_006306	12.0758	2.54733	5.84551	1.10869	0.00110057	0.00324274	1	1	up	nucleoporin NSP1-like
AARA21_003027	6958.37	2.54598	5.84003	0.355996	8.76379e-14	4.96756e-12	1	1	up	protein O-mannosyl-transferase TMTC2, transcript variant X1
AARA21_014865	66509.4	2.53435	5.79314	0.377788	2.03295e-12	7.64854e-11	1	1	up	serine protease SP24D-like
AARA21_008391	4105.43	2.52945	5.77352	0.403031	3.4581e-11	8.65669e-10	1	1	up	diacylglycerol kinase eta
AARA21_015687	5.81323	2.52634	5.76107	1.67862	0.00642838	0.0151602	0	1		tRNA-Ser
AARA21_002029	2381.41	2.52232	5.74504	0.375219	1.78902e-12	6.77041e-11	1	1	up	MOXD1 homolog 2-like
AARA21_008925	316.464	2.52191	5.74341	0.524483	1.31767e-07	1.11469e-06	1	1	up	general odorant-binding protein 99b-like
AARA21_015444	45.6447	2.52045	5.73762	0.629289	4.85629e-06	2.69104e-05	1	1	up	large subunit ribosomal RNA
AARA21_014068	16.2027	3.45692	10.9809	0.93299	1.08694e-05	5.55207e-05	1	1	up	uncharacterized LOC120894698, transcript variant X1
AARA21_000192	4514.53	2.49567	5.63992	0.269362	2.05758e-21	6.58671e-19	1	1	up	ATP-binding cassette sub-family A member 3-like, transcript variant X1
AARA21_014108	80.8917	3.41766	10.6861	1.24411	0.000233246	0.000820666	1	1	up	probable chitinase 10
AARA21_005064	1106.18	2.4895	5.61584	0.753972	7.43979e-05	0.000301031	1	1	up	neurotrophin 1
AARA21_003770	103.744	2.48327	5.59165	1.04485	0.00104086	0.00308518	1	1	up	peroxidase-like
AARA21_000650	46563.8	2.48129	5.58396	0.39446	3.3147e-11	8.33012e-10	1	1	up	low-density lipoprotein receptor-related protein 4, transcript variant X1
AARA21_004265	17515	2.47723	5.56829	0.366688	1.49874e-12	5.70542e-11	1	1	up	guanine nucleotide-binding protein subunit beta-1, transcript variant X9
AARA21_004512	52220.6	2.47706	5.56761	0.34837	1.25951e-13	6.80931e-12	1	1	up	polypyrimidine tract-binding protein 1, transcript variant X5
AARA21_002793	4768.62	2.4695	5.5385	0.579582	1.84383e-06	1.15056e-05	1	1	up	elongation of very long chain fatty acids protein, transcript variant X3
AARA21_009315	24.6453	2.46926	5.53758	0.661339	1.5465e-05	7.58048e-05	1	1	up	large subunit ribosomal RNA
AARA21_011280	10388.9	3.41433	10.6614	0.543755	2.20769e-11	5.94276e-10	1	1	up	farnesol dehydrogenase-like
AARA21_002574	387.57	2.46373	5.51639	0.503104	9.35447e-08	8.32968e-07	1	1	up	procathepsin L-like, transcript variant X4
AARA21_012637	469.384	3.40385	10.5843	0.496669	5.11213e-13	2.2682e-11	1	1	up	probable serine/threonine-protein kinase samkC
AARA21_000050	21446.4	2.45793	5.49427	0.377894	6.58718e-12	2.0723e-10	1	1	up	cubilin, transcript variant X15
AARA21_015736	3.3791	2.45737	5.49214	2.16106	0.00875741	0.0197444	0	1		large subunit ribosomal RNA
AARA21_011060	46.375	2.45357	5.4777	0.739288	7.0113e-05	0.000285398	1	1	up	phospholipase B1, membrane-associated-like, transcript variant X2
AARA21_012058	167.386	3.37347	10.3637	2.281	0.00261009	0.00686088	1	1	up	skin secretory protein xP2
AARA21_015513	8182.54	2.44485	5.44467	0.398119	8.36845e-11	1.86939e-09	1	1	up	neuroglobin-like, transcript variant X2
AARA21_015577	48.5537	3.33888	10.1182	1.01485	4.74445e-05	0.000203151	1	1	up	uncharacterized protein K02A2.6-like
AARA21_012769	2157.21	3.33196	10.0698	0.477873	2.24962e-13	1.13513e-11	1	1	up	cytochrome P450 9e2-like
AARA21_011150	6.52746	2.43977	5.42553	1.56081	0.00470284	0.011558	0	1		large subunit ribosomal RNA
AARA21_015440	55.4935	3.30713	9.89796	0.730277	4.22475e-07	3.10983e-06	1	1	up	uncharacterized LOC120908411
AARA21_004362	24.76	3.2878	9.7662	0.928791	2.11914e-05	9.95872e-05	1	1	up	protein obstructor-E
AARA21_001086	15.0487	3.28747	9.764	0.775952	1.3417e-06	8.67955e-06	1	1	up	large subunit ribosomal RNA
AARA21_003107	121.732	2.4286	5.38372	0.4773	3.07309e-08	3.1407e-07	1	1	up	dopamine D2-like receptor
AARA21_012862	73.4673	2.42238	5.36055	0.971022	0.000807151	0.00246333	1	1	up	very long-chain specific acyl-CoA dehydrogenase, mitochondrial-like, transcript variant X2
AARA21_011560	693.787	2.42218	5.35982	0.524336	3.65044e-07	2.74359e-06	1	1	up	pheromone-binding protein-related protein 6-like
AARA21_006756	8900.63	2.4205	5.35356	0.365665	3.88176e-12	1.3075e-10	1	1	up	MAM domain-containing glycosylphosphatidylinositol anchor protein 1, transcript variant X2
AARA21_013889	15577.2	2.41888	5.34756	0.343718	1.92289e-13	9.89672e-12	1	1	up	sodium/potassium/calcium exchanger Nckx30C, transcript variant X5
AARA21_001783	18.2555	2.41501	5.33324	0.822214	0.000237105	0.000833103	1	1	up	odorant receptor Or2-like
AARA21_011421	20.8679	3.27315	9.66757	0.822866	3.85681e-06	2.19388e-05	1	1	up	endochitinase A
AARA21_014337	1570.91	2.41008	5.31505	0.408525	3.77543e-10	6.80371e-09	1	1	up	nucleolar protein 4-like, transcript variant X4
AARA21_009959	10518.9	2.40979	5.31399	0.421038	1.07094e-09	1.68663e-08	1	1	up	DNA-binding protein D-ETS-4
AARA21_005911	26445.6	2.40207	5.2856	0.367164	5.04495e-12	1.64755e-10	1	1	up	voltage-dependent L-type calcium channel subunit beta-2, transcript variant X16
AARA21_005988	250.749	3.2511	9.52091	1.21818	0.000318272	0.00108224	1	1	up	pyrimidine-specific ribonucleoside hydrolase RihA-like, transcript variant X1
AARA21_002144	16898.7	2.39849	5.27249	0.373158	1.26283e-11	3.68455e-10	1	1	up	innexin shaking-B, transcript variant X5
AARA21_009292	25131.3	2.39754	5.26905	0.34637	4.85685e-13	2.18507e-11	1	1	up	protein catecholamines up-like, transcript variant X1
AARA21_011169	35484.5	2.39361	5.25472	0.408974	5.22409e-10	8.98642e-09	1	1	up	nucleolysin TIAR, transcript variant X2
AARA21_006157	17220	2.3906	5.24376	0.551094	1.41147e-06	9.08072e-06	1	1	up	zinc finger protein chinmo, transcript variant X2
AARA21_001432	3413.51	3.24793	9.49999	0.461047	1.35665e-13	7.24317e-12	1	1	up	uncharacterized LOC120901156
AARA21_013051	155.59	2.38529	5.22448	0.793212	0.000205871	0.000733982	1	1	up	U2 spliceosomal RNA
AARA21_009513	5665.88	2.38219	5.21328	0.33228	8.23609e-14	4.75219e-12	1	1	up	tumor necrosis factor alpha-induced protein 8-like protein, transcript variant X2
AARA21_002716	3471.04	3.2393	9.44338	0.6752	1.13637e-07	9.81319e-07	1	1	up	polyubiquitin-B
AARA21_008235	8464.64	2.37837	5.1995	0.368965	1.26107e-11	3.68455e-10	1	1	up	astacin-like metalloprotease toxin 4
AARA21_009861	7.56656	2.37489	5.18697	1.19418	0.00251266	0.00664554	1	1	up	ionotropic receptor 40a
AARA21_014358	112769	3.21209	9.26691	0.316491	2.81947e-25	1.85398e-22	1	1	up	uncharacterized LOC120897189
AARA21_000680	2202.11	2.37247	5.17827	0.432861	4.49423e-09	5.88873e-08	1	1	up	headcase protein-like
AARA21_008939	70.4308	3.21165	9.26412	0.618709	1.40126e-08	1.57193e-07	1	1	up	uncharacterized LOC120903851, transcript variant X3
AARA21_012348	20427.1	2.35891	5.12982	0.37137	2.35776e-11	6.26026e-10	1	1	up	ALK tyrosine kinase receptor, transcript variant X4
AARA21_000020	343.151	2.35877	5.12933	0.512617	3.92904e-07	2.91215e-06	1	1	up	small nucleolar RNA U3
AARA21_006186	26.1192	2.35569	5.11839	0.640615	2.32036e-05	0.000107784	1	1	up	ADP-ribosylation factor-like protein 13B
AARA21_004218	254.308	2.35545	5.11755	0.574291	3.71104e-06	2.12505e-05	1	1	up	pheromone-binding protein-related protein 6-like
AARA21_004351	135.456	3.18191	9.07506	0.67367	1.48099e-07	1.2366e-06	1	1	up	insulinoma-associated protein 1b
AARA21_001935	2230.23	2.34699	5.0876	0.321558	3.23502e-14	2.08125e-12	1	1	up	zwei Ig domain protein zig-8-like
AARA21_001968	12978.4	2.3468	5.08693	0.560423	2.78514e-06	1.65986e-05	1	1	up	antigen 5 like allergen Cul n 1-like
AARA21_008188	3163.19	2.34242	5.07154	0.370107	2.7276e-11	7.00519e-10	1	1	up	lachesin, transcript variant X3
AARA21_008330	5387.2	2.3417	5.069	0.428989	5.12678e-09	6.61648e-08	1	1	up	LIM and SH3 domain protein Lasp-like, transcript variant X10
AARA21_009445	3232.48	2.33808	5.05628	0.384628	1.30864e-10	2.74239e-09	1	1	up	prostaglandin E synthase-like
AARA21_012688	27688	2.33604	5.04913	0.35887	8.31422e-12	2.55931e-10	1	1	up	transcription factor AP-1
AARA21_002896	16905	2.33588	5.04859	0.370126	2.3597e-11	6.26026e-10	1	1	up	potassium voltage-gated channel protein Shal, transcript variant X9
AARA21_004144	36932.5	2.33582	5.04837	0.399694	5.43733e-10	9.32828e-09	1	1	up	sarcoplasmic reticulum histidine-rich calcium-binding protein-like
AARA21_013477	3041.4	3.18182	9.07454	0.599587	7.37106e-09	8.99843e-08	1	1	up	probable cytochrome P450 6a14
AARA21_008522	120.614	2.33449	5.04373	0.307834	3.42651e-15	2.84445e-13	1	1	up	zwei Ig domain protein zig-8-like, transcript variant X2
AARA21_005643	1571.19	3.17731	9.04618	0.622431	2.22525e-08	2.33352e-07	1	1	up	maltase 2-like
AARA21_000058	2043.52	3.15857	8.92946	0.744836	1.34813e-06	8.70806e-06	1	1	up	annulin-like
AARA21_009459	9.56646	2.32876	5.02372	0.811189	0.000313365	0.00106753	1	1	up	large subunit ribosomal RNA
AARA21_000525	20348.5	2.3279	5.02076	0.422054	3.79044e-09	5.10163e-08	1	1	up	heat shock protein 83
AARA21_006203	56.6714	2.32314	5.00421	0.416051	2.14226e-09	3.11463e-08	1	1	up	transient receptor potential cation channel subfamily V member 5
AARA21_008499	34813.3	2.32302	5.00379	0.356254	8.02732e-12	2.48886e-10	1	1	up	teneurin-a, transcript variant X1
AARA21_009734	101.06	3.1515	8.88577	0.565817	1.76663e-09	2.62788e-08	1	1	up	myosin regulatory light polypeptide 9-like
AARA21_010605	31.1903	3.14342	8.83615	0.747099	1.47717e-06	9.46079e-06	1	1	up	homeobox protein ceh-19
AARA21_000151	169.705	2.30582	4.9445	0.386406	2.32208e-10	4.47671e-09	1	1	up	fatty acyl-CoA reductase wat-like, transcript variant X1
AARA21_009989	63178.3	2.30231	4.93247	0.3747	9.30687e-11	2.04354e-09	1	1	up	J domain-containing protein, transcript variant X1
AARA21_010306	17.0389	2.30128	4.92894	0.689581	6.57766e-05	0.000270054	1	1	up	large subunit ribosomal RNA
AARA21_006716	1056.57	3.13741	8.79941	0.502016	2.95773e-11	7.52116e-10	1	1	up	glutathione peroxidase-like
AARA21_000658	4477.24	2.29644	4.91242	0.347357	4.17184e-12	1.39065e-10	1	1	up	Fc receptor-like protein 5, transcript variant X1
AARA21_012190	11911	3.12346	8.71475	0.5294	2.80312e-10	5.22721e-09	1	1	up	uncharacterized LOC120893890
AARA21_010950	1101.04	2.29371	4.90315	0.41621	4.0253e-09	5.35611e-08	1	1	up	muscarinic acetylcholine receptor DM1, transcript variant X4
AARA21_009676	55.2351	2.29153	4.89574	0.555262	3.14612e-06	1.84846e-05	1	1	up	intraflagellar transport protein 20 homolog
AARA21_005363	37549.7	2.28796	4.88363	0.330802	5.47634e-13	2.40492e-11	1	1	up	AF4/FMR2 family member lilli, transcript variant X8
AARA21_013657	12343.1	2.28775	4.88294	0.351981	9.33773e-12	2.84039e-10	1	1	up	neurexin-1, transcript variant X3
AARA21_013984	511.046	2.28626	4.87791	0.414387	3.65488e-09	4.93985e-08	1	1	up	repressed by EFG1 protein 1-like
AARA21_008870	23.1621	2.28567	4.8759	0.572057	5.98467e-06	3.23549e-05	1	1	up	tRNA-Glu
AARA21_010799	2223.66	3.09583	8.54942	0.603156	1.94842e-08	2.09429e-07	1	1	up	probable cytochrome P450 6a14
AARA21_004909	10639.4	2.27281	4.83262	0.31089	3.15987e-14	2.04312e-12	1	1	up	calcium/calmodulin-dependent 3',5'-cyclic nucleotide phosphodiesterase 1-like, transcript variant X11
AARA21_009745	30245.9	2.27272	4.83233	0.317966	7.55051e-14	4.39604e-12	1	1	up	neuronal calcium sensor 2, transcript variant X5
AARA21_008046	162.778	3.08871	8.50734	0.400118	1.0943e-15	9.91572e-14	1	1	up	uncharacterized LOC120905084
AARA21_014211	5215.06	3.08275	8.47229	0.219525	7.14715e-46	4.59812e-42	1	1	up	scavenger receptor class B member 1
AARA21_001661	42648	2.26921	4.82059	0.320976	1.86528e-13	9.63879e-12	1	1	up	protein alan shepard, transcript variant X1
AARA21_010696	33.8752	3.06863	8.38974	1.52481	0.00147085	0.00417688	1	1	up	uncharacterized LOC120894880
AARA21_002509	1125.54	3.06677	8.37897	0.554833	2.47907e-09	3.52856e-08	1	1	up	pupal cuticle protein 36-like
AARA21_011963	30.9187	2.25897	4.7865	0.616863	2.23568e-05	0.000104416	1	1	up	nose resistant to fluoxetine protein 6, transcript variant X4
AARA21_000305	17231.3	3.04803	8.27081	0.445185	5.80136e-13	2.51334e-11	1	1	up	cytochrome P450 6d3-like
AARA21_012071	27.7421	3.02339	8.13076	1.05765	0.000211224	0.0007514	1	1	up	ninjurin-1-like, transcript variant X3
AARA21_012043	2836.37	2.24637	4.74487	0.455329	8.86024e-08	7.93353e-07	1	1	up	caspase-1-like
AARA21_001590	10219.8	2.24261	4.73251	0.353429	2.63491e-11	6.78069e-10	1	1	up	neuronal acetylcholine receptor subunit alpha-7, transcript variant X1
AARA21_010481	14548	2.24183	4.72998	0.359469	5.31554e-11	1.25748e-09	1	1	up	zwei Ig domain protein zig-8-like, transcript variant X2
AARA21_004958	115.607	3.01492	8.08317	0.463007	5.17662e-12	1.68627e-10	1	1	up	LOC120907579
AARA21_012868	1084.23	2.2402	4.72462	0.452702	8.00302e-08	7.28252e-07	1	1	up	general odorant-binding protein 71
AARA21_003291	33.2311	2.98804	7.93396	0.519004	5.48613e-10	9.39947e-09	1	1	up	LOC120908040
AARA21_008729	13061.1	2.23963	4.72275	0.280897	1.89532e-16	2.08436e-14	1	1	up	hornerin, transcript variant X4
AARA21_000630	22412.1	2.98641	7.92502	0.393681	2.81385e-15	2.36639e-13	1	1	up	uncharacterized LOC120896198, transcript variant X1
AARA21_014176	14.7798	2.2314	4.69588	0.880339	0.000807325	0.00246333	1	1	up	odorant receptor Or2
AARA21_010342	2696.15	2.97995	7.8896	0.323323	2.60649e-21	7.98516e-19	1	1	up	low molecular weight phosphotyrosine protein phosphatase 1
AARA21_015621	44856.9	2.22982	4.69077	0.337774	4.95446e-12	1.62211e-10	1	1	up	RNA-binding protein Musashi homolog Rbp6, transcript variant X7
AARA21_006075	2518.6	2.22892	4.68782	0.372926	2.59852e-10	4.93145e-09	1	1	up	facilitated trehalose transporter Tret1-like
AARA21_007458	48394.9	2.2223	4.66637	0.352089	3.07073e-11	7.79311e-10	1	1	up	solute carrier family 12 member 4, transcript variant X10
AARA21_010793	1010.86	2.21851	4.65414	0.552222	6.01927e-06	3.2501e-05	1	1	up	sensory neuron membrane protein 1
AARA21_013738	3031.58	2.21704	4.64938	0.416022	1.11033e-08	1.28361e-07	1	1	up	retinol-binding protein pinta
AARA21_011581	22910.7	2.21569	4.64503	0.354042	4.74778e-11	1.14186e-09	1	1	up	BTB/POZ domain-containing protein KCTD12
AARA21_008412	9449.39	2.21566	4.64495	0.393883	2.18011e-09	3.1554e-08	1	1	up	histidine-rich glycoprotein-like
AARA21_007575	6058.14	2.21361	4.63833	0.33868	7.70094e-12	2.40505e-10	1	1	up	acetylcholine receptor subunit beta-like 1
AARA21_010693	3249.45	2.95132	7.73458	0.495058	1.982e-10	3.93556e-09	1	1	up	UDP-glycosyltransferase UGT5-like
AARA21_001383	3722.84	2.94476	7.69946	0.614312	1.17717e-07	1.0118e-06	1	1	up	alpha-amylase A-like
AARA21_005965	14.1223	2.20694	4.61695	0.885811	0.000909238	0.00273985	1	1	up	large subunit ribosomal RNA
AARA21_006925	35736.5	2.20377	4.60681	0.332077	3.94465e-12	1.32177e-10	1	1	up	prohormone-3, transcript variant X4
AARA21_004519	30.7621	2.20076	4.59722	0.641179	4.13272e-05	0.000179951	1	1	up	odorant receptor 63a-like
AARA21_010898	24184.1	2.19992	4.59455	0.34466	2.14297e-11	5.79276e-10	1	1	up	ecdysone receptor, transcript variant X6
AARA21_000502	2441.49	2.19805	4.58858	0.287103	2.32431e-15	1.98059e-13	1	1	up	dual specificity protein phosphatase Mpk3, transcript variant X4
AARA21_014026	46.9491	2.92093	7.57335	0.797908	1.98127e-05	9.41596e-05	1	1	up	uncharacterized LOC120895557
AARA21_006333	3666.05	2.19644	4.58347	0.387724	1.73927e-09	2.59018e-08	1	1	up	protein deltex-like
AARA21_005017	41.7155	2.91642	7.54973	1.56991	0.0020539	0.00556838	1	1	up	very long-chain specific acyl-CoA dehydrogenase, mitochondrial-like
AARA21_013800	18941	2.19086	4.56579	0.371267	4.40758e-10	7.76882e-09	1	1	up	nuclear hormone receptor FTZ-F1, transcript variant X9
AARA21_001842	2122.83	2.90732	7.50224	0.388622	6.42027e-15	5.09936e-13	1	1	up	venom carboxylesterase-6-like
AARA21_014819	12572.5	2.18858	4.55857	0.278134	4.49837e-16	4.41836e-14	1	1	up	protein sprouty, transcript variant X2
AARA21_004750	33.1369	2.18827	4.55758	0.612525	3.30387e-05	0.000147453	1	1	up	chaoptin-like
AARA21_002953	5.53407	2.18714	4.55401	1.97336	0.00854075	0.0193305	0	1		tRNA-Pro
AARA21_003491	9466.77	2.90369	7.48335	0.683294	1.5841e-06	1.00655e-05	1	1	up	chymotrypsin-2-like
AARA21_005850	13.167	2.1845	4.54569	0.839132	0.000794302	0.00242877	1	1	up	serine/arginine repetitive matrix protein 2-like
AARA21_006666	361.528	2.17826	4.52609	0.418074	2.10507e-08	2.22929e-07	1	1	up	protein Cep89 homolog, transcript variant X1
AARA21_004244	13453.4	2.17765	4.52417	0.352883	8.32607e-11	1.86316e-09	1	1	up	myb-like protein Q, transcript variant X1
AARA21_015434	2723.56	2.1771	4.52245	0.369857	4.80795e-10	8.39401e-09	1	1	up	optomotor-blind protein-like, transcript variant X3
AARA21_008891	2345.97	2.17665	4.52103	0.338469	1.54692e-11	4.4036e-10	1	1	up	serine proteinase stubble
AARA21_008721	11898.6	2.17623	4.5197	0.343424	2.91034e-11	7.41531e-10	1	1	up	G protein alpha i subunit
AARA21_012443	17236.3	2.17623	4.5197	0.35117	7.14365e-11	1.62476e-09	1	1	up	glutamate-gated chloride channel, transcript variant X3
AARA21_000775	16.4009	2.17577	4.51826	0.743251	0.00026739	0.000925207	1	1	up	ionotropic receptor 75a-like
AARA21_000405	15159.4	2.17087	4.50295	0.212275	1.94468e-25	1.39012e-22	1	1	up	glutamate--cysteine ligase regulatory subunit, transcript variant X2
AARA21_001883	258.927	2.89553	7.44119	0.550388	1.05933e-08	1.23576e-07	1	1	up	sialin-like
AARA21_015069	8498.12	2.16373	4.48071	0.333914	1.14545e-11	3.3804e-10	1	1	up	JNK-interacting protein 1, transcript variant X1
AARA21_007826	11569.8	2.16368	4.48057	0.322878	2.59694e-12	9.35988e-11	1	1	up	voltage-dependent T-type calcium channel subunit alpha-1G, transcript variant X1
AARA21_007578	572.994	2.16316	4.47893	0.480217	7.30461e-07	5.04229e-06	1	1	up	ras-related protein Rab-23, transcript variant X2
AARA21_009826	10.2602	2.1624	4.4766	0.797141	0.000560047	0.00177709	1	1	up	forkhead box protein K2-like, transcript variant X1
AARA21_007123	85247.5	2.15807	4.46319	0.368441	5.70457e-10	9.69625e-09	1	1	up	calcium/calmodulin-dependent protein kinase type II alpha chain, transcript variant X1
AARA21_002152	15.7523	2.15766	4.46191	0.646329	6.29625e-05	0.000259826	1	1	up	U2 spliceosomal RNA
AARA21_002833	188676	2.15703	4.45995	0.420372	3.52613e-08	3.53079e-07	1	1	up	protein scylla-like, transcript variant X1
AARA21_007060	140836	2.15694	4.45969	0.378474	1.50004e-09	2.28145e-08	1	1	up	myogenesis-regulating glycosidase-like
AARA21_006449	141.372	2.1561	4.45707	0.424603	4.00739e-08	3.94213e-07	1	1	up	intraflagellar transport protein 81 homolog
AARA21_008224	9316.85	2.15499	4.45365	0.732946	0.000295098	0.001012	1	1	up	alpha-amylase 2-like
AARA21_009539	221.833	2.14977	4.43758	0.422904	4.05256e-08	3.97745e-07	1	1	up	parkin coregulated gene protein homolog
AARA21_013970	4235.03	2.14958	4.43698	0.412062	2.13499e-08	2.25901e-07	1	1	up	proton-coupled amino acid transporter-like protein pathetic, transcript variant X2
AARA21_008324	39.4103	2.14711	4.42939	0.473489	5.14934e-07	3.71186e-06	1	1	up	large subunit ribosomal RNA
AARA21_002937	434.636	2.14611	4.42633	0.417549	3.17387e-08	3.22911e-07	1	1	up	inhibitory POU protein, transcript variant X3
AARA21_014877	25.2484	2.89109	7.41832	0.673061	1.20099e-06	7.86819e-06	1	1	up	large subunit ribosomal RNA
AARA21_003957	4124.85	2.13948	4.40603	0.361226	4.1496e-10	7.38491e-09	1	1	up	broad-complex core protein isoforms 1/2/3/4/5, transcript variant X6
AARA21_009186	3990.52	2.13348	4.38775	0.297135	8.88902e-14	5.01645e-12	1	1	up	glutamate receptor 1-like, transcript variant X5
AARA21_009089	2061.05	2.12956	4.37584	0.330278	1.72136e-11	4.83693e-10	1	1	up	myelin transcription factor 1-like
AARA21_007152	52615.4	2.12863	4.37303	0.485754	1.37493e-06	8.85888e-06	1	1	up	facilitated trehalose transporter Tret1, transcript variant X4
AARA21_004376	5315.31	2.12566	4.36402	0.525564	5.92615e-06	3.20655e-05	1	1	up	broad-complex core protein, transcript variant X7
AARA21_014470	11117.1	2.12542	4.36331	0.412208	3.00749e-08	3.081e-07	1	1	up	lipase 3-like
AARA21_001222	18.4728	2.12326	4.35676	1.13975	0.00381078	0.00957868	1	1	up	odorant receptor 49b-like
AARA21_002424	136.386	2.12215	4.35343	0.635693	7.87456e-05	0.000316137	1	1	up	gustatory and odorant receptor 22
AARA21_009057	367.62	2.87398	7.33085	0.391119	1.745e-14	1.20715e-12	1	1	up	oxidative stress-induced growth inhibitor 2-like
AARA21_015195	5374.97	2.86971	7.30919	0.569867	3.67715e-08	3.66373e-07	1	1	up	uncharacterized LOC120893500
AARA21_015539	8997.44	2.11609	4.33519	0.392478	8.24935e-09	9.98536e-08	1	1	up	neogenin, transcript variant X1
AARA21_005573	6.61952	2.11516	4.33239	1.9021	0.0103666	0.0228756	0	1		dynein regulatory complex protein 11
AARA21_012199	25218.8	2.11507	4.33211	0.331677	2.48416e-11	6.50992e-10	1	1	up	diacylglycerol kinase theta, transcript variant X4
AARA21_007162	720.331	2.11252	4.32445	0.572487	2.39812e-05	0.000111035	1	1	up	esterase B1
AARA21_015357	1457.58	2.11073	4.3191	0.352925	3.40923e-10	6.21677e-09	1	1	up	patj homolog, transcript variant X1
AARA21_000066	2167.88	2.11	4.3169	0.374608	2.21969e-09	3.20547e-08	1	1	up	nyctalopin-like, transcript variant X1
AARA21_009143	39.1935	2.10841	4.31216	0.613194	5.40665e-05	0.000227791	1	1	up	ionotropic receptor 21a
AARA21_003135	27.7167	2.8325	7.1231	0.865205	6.00219e-05	0.000249409	1	1	up	prostasin-like
AARA21_009193	578.264	2.10457	4.30071	0.369432	1.51449e-09	2.3007e-08	1	1	up	solute carrier family 22 member 5-like
AARA21_009960	53.5584	2.10449	4.30044	0.746598	0.000453256	0.00147946	1	1	up	60S ribosomal protein L37-like, transcript variant X3
AARA21_007170	6.33614	2.09633	4.27619	0.976981	0.00245031	0.00650718	1	1	up	large subunit ribosomal RNA
AARA21_000022	30155.2	2.0957	4.27433	0.231524	1.889e-20	5.28386e-18	1	1	up	calcium-binding mitochondrial carrier protein SCaMC-2, transcript variant X4
AARA21_000919	10.8497	2.83225	7.12186	1.0397	0.000309665	0.00105661	1	1	up	ionotropic receptor 21a-like
AARA21_009688	2421.33	2.0944	4.27049	0.316123	4.5293e-12	1.49611e-10	1	1	up	lachesin, transcript variant X1
AARA21_003437	6295.43	2.09017	4.25799	0.391338	1.17292e-08	1.34032e-07	1	1	up	semaphorin-1A, transcript variant X3
AARA21_006122	86.285	2.81956	7.05946	0.732606	7.86583e-06	4.14284e-05	1	1	up	uncharacterized LOC120906684
AARA21_011231	33.318	2.08622	4.24635	0.750286	0.00045595	0.0014875	1	1	up	calphotin-like
AARA21_006325	11827.9	2.08532	4.24369	0.2986	3.85105e-13	1.79534e-11	1	1	up	disintegrin and metalloproteinase domain-containing protein 10, transcript variant X8
AARA21_002512	27.8193	2.80884	7.00719	0.683821	2.64249e-06	1.58291e-05	1	1	up	uncharacterized LOC120908267
AARA21_014158	124.795	2.08472	4.24192	0.521593	6.75556e-06	3.61129e-05	1	1	up	protein tilB
AARA21_010465	329.017	2.08219	4.23449	0.510483	5.07256e-06	2.80243e-05	1	1	up	putative ammonium transporter 2
AARA21_000507	7218.61	2.07923	4.22583	0.344439	2.06229e-10	4.06364e-09	1	1	up	serine-rich adhesin for platelets-like, transcript variant X3
AARA21_009813	9177.92	2.07366	4.20953	0.323554	1.87148e-11	5.18974e-10	1	1	up	zwei Ig domain protein zig-8, transcript variant X3
AARA21_014221	11600.3	2.07244	4.20599	0.343838	2.19375e-10	4.28331e-09	1	1	up	voltage-dependent calcium channel subunit alpha-2/delta-4, transcript variant X1
AARA21_010043	1271.9	2.07222	4.20532	0.63706	0.000118152	0.000454152	1	1	up	glucose dehydrogenase [FAD, quinone]
AARA21_011754	119.669	2.07177	4.20402	0.431439	1.6733e-07	1.38281e-06	1	1	up	large subunit ribosomal RNA
AARA21_007967	18098.4	2.06195	4.17551	0.369891	3.22277e-09	4.42083e-08	1	1	up	trans-1,2-dihydrobenzene-1,2-diol dehydrogenase-like
AARA21_014987	47.5824	2.75492	6.75016	0.892027	0.000134402	0.000509231	1	1	up	uncharacterized LOC120899874
AARA21_006622	226.312	2.05974	4.1691	0.341314	2.03511e-10	4.02238e-09	1	1	up	zwei Ig domain protein zig-8-like, transcript variant X1
AARA21_010452	50.7891	2.75242	6.73848	0.602066	3.84346e-07	2.86357e-06	1	1	up	Bardet-Biedl syndrome 5 protein homolog
AARA21_010497	18127.1	2.74922	6.72356	0.534617	2.20725e-08	2.31842e-07	1	1	up	uncharacterized LOC120894254
AARA21_005348	5897.16	2.0578	4.16352	0.336346	1.37087e-10	2.85883e-09	1	1	up	neuronal acetylcholine receptor subunit alpha-7-like, transcript variant X1
AARA21_014722	1748.55	2.0483	4.13619	0.41421	1.04984e-07	9.17057e-07	1	1	up	B-cell lymphoma/leukemia 11B-like, transcript variant X3
AARA21_003034	17003.9	2.04605	4.12975	0.336667	1.64265e-10	3.37118e-09	1	1	up	calcium-activated potassium channel slowpoke, transcript variant X21
AARA21_000269	16.8202	2.04366	4.12291	0.713066	0.000550102	0.0017501	1	1	up	phospholipase B1, membrane-associated-like, transcript variant X1
AARA21_004761	953.782	2.04099	4.11529	0.221271	3.48553e-21	1.04298e-18	1	1	up	START domain-containing protein 10-like
AARA21_010952	62.3183	2.03971	4.11162	0.643473	0.000150657	0.000561236	1	1	up	cyclin-dependent kinase 20
AARA21_014160	1508.65	2.03947	4.11095	0.615705	9.73309e-05	0.000381933	1	1	up	cold shock-induced protein TIR2-like
AARA21_004813	16008.1	2.0394	4.11075	0.278617	3.4542e-14	2.21121e-12	1	1	up	phosphofurin acidic cluster sorting protein 2
AARA21_007794	25.1116	2.03897	4.10951	0.736133	0.000473494	0.0015385	1	1	up	calmodulin-beta-like, transcript variant X2
AARA21_008730	4088.39	2.03804	4.10687	0.470215	1.77587e-06	1.11247e-05	1	1	up	putative epidermal cell surface receptor, transcript variant X4
AARA21_003867	85.0315	2.03777	4.1061	0.435718	3.35166e-07	2.5482e-06	1	1	up	serine protease filzig
AARA21_006524	2472.74	2.74216	6.69073	0.488123	1.58767e-09	2.38651e-08	1	1	up	putative fatty acyl-CoA reductase CG8306
AARA21_000165	6868.84	2.03408	4.09561	0.334353	1.56262e-10	3.23251e-09	1	1	up	acyl-CoA desaturase, transcript variant X1
AARA21_013307	34.0941	2.74003	6.68084	0.809036	6.50639e-05	0.000267554	1	1	up	venom allergen 3-like
AARA21_001424	1180.66	2.73745	6.66889	1.23736	0.00121303	0.00353363	1	1	up	LOC120895121
AARA21_008181	12002.3	2.02252	4.06293	0.426901	2.75163e-07	2.14968e-06	1	1	up	annexin B10-like
AARA21_010525	656.191	2.02187	4.06108	0.325767	7.14708e-11	1.62476e-09	1	1	up	neuropeptide CCHamide-2 receptor-like, transcript variant X1
AARA21_013351	300.377	2.02025	4.05653	0.544577	2.30252e-05	0.000107109	1	1	up	pancreatic triacylglycerol lipase-like
AARA21_007007	584.559	2.71845	6.58165	0.885922	0.000141307	0.000531638	1	1	up	apyrase-like
AARA21_000586	5178.86	2.01763	4.04918	0.310516	1.12309e-11	3.32201e-10	1	1	up	prolyl endopeptidase FAP, transcript variant X1
AARA21_005853	1781.85	2.01582	4.04409	0.612051	0.000108888	0.000421121	1	1	up	general odorant-binding protein lush-like
AARA21_007784	17.5079	2.01496	4.04169	1.0043	0.00310843	0.00799922	1	1	up	ionotropic receptor 75a-like
AARA21_007856	815.769	2.01325	4.03691	0.391447	3.24343e-08	3.2835e-07	1	1	up	arginine kinase-like, transcript variant X3
AARA21_013245	122.612	2.00762	4.0212	0.495852	6.46358e-06	3.46962e-05	1	1	up	dynein regulatory complex protein 10-like
AARA21_008909	42534.4	2.00738	4.02052	0.465994	2.1167e-06	1.30189e-05	1	1	up	homeotic protein female sterile-like, transcript variant X1
AARA21_002911	214.051	2.71747	6.57719	0.595005	4.14056e-07	3.06363e-06	1	1	up	DNA-binding protein D-ETS-6-like, transcript variant X2
AARA21_006475	206.67	2.00537	4.01491	0.432147	4.18727e-07	3.08578e-06	1	1	up	dachshund homolog 1-like
AARA21_010083	192.729	2.00504	4.01401	0.415373	1.97917e-07	1.60568e-06	1	1	up	forkhead box C1-A
AARA21_005672	5111.06	2.70792	6.53378	0.480282	1.60878e-09	2.41542e-08	1	1	up	uncharacterized LOC120901444
AARA21_007074	1861.8	2.00416	4.01156	0.340333	5.19433e-10	8.94718e-09	1	1	up	polypeptide N-acetylgalactosaminyltransferase 16-like
AARA21_010425	1036.62	2.69856	6.49153	0.417366	8.70788e-12	2.66772e-10	1	1	up	uncharacterized LOC120900297
AARA21_012818	11.7787	1.99963	3.99897	2.32838	0.0149904	0.031634	0	1		lopap-like
AARA21_006199	41652.3	2.68015	6.40922	0.484796	2.92597e-09	4.05257e-08	1	1	up	aminopeptidase N-like, transcript variant X2
AARA21_003663	1377.85	1.99844	3.99568	0.303079	5.74418e-12	1.84315e-10	1	1	up	tyrosine-protein kinase Dnt-like
AARA21_000089	682.261	1.99609	3.98919	0.332629	2.54975e-10	4.8532e-09	1	1	up	bromodomain-containing protein DDB_G0280777, transcript variant X2
AARA21_001997	26524.5	1.99432	3.98428	0.282263	2.28866e-13	1.14797e-11	1	1	up	ataxin-2 homolog, transcript variant X2
AARA21_010206	69131	1.99428	3.98417	0.316135	3.99869e-11	9.81892e-10	1	1	up	pneumococcal serine-rich repeat protein, transcript variant X6
AARA21_005050	6103.7	1.99399	3.98338	0.342125	7.69971e-10	1.26529e-08	1	1	up	voltage-dependent calcium channel type A subunit alpha-1-like, transcript variant X7
AARA21_011302	2577.7	1.99194	3.97772	0.305682	1.01969e-11	3.05112e-10	1	1	up	mucin-12
AARA21_015298	49.7347	2.67844	6.40163	1.10516	0.000771638	0.00236735	1	1	up	uncharacterized protein K02A2.6-like
AARA21_000747	18.5832	1.99095	3.97497	1.00084	0.00341983	0.0087014	1	1	up	elongation of very long chain fatty acids protein 4
AARA21_014999	73.519	1.98989	3.97206	0.546852	2.95014e-05	0.000133566	1	1	up	4-coumarate--CoA ligase 3-like
AARA21_000572	179.176	2.67167	6.37167	0.421677	2.42633e-11	6.38437e-10	1	1	up	uncharacterized LOC120897571
AARA21_003698	14970.9	1.98731	3.96497	0.313334	3.15971e-11	7.97175e-10	1	1	up	phosphatidylcholine:ceramide cholinephosphotransferase 1-like, transcript variant X3
AARA21_014393	112662	1.98615	3.96178	0.248732	2.04624e-16	2.21252e-14	1	1	up	23 kDa integral membrane protein-like, transcript variant X3
AARA21_011375	199.451	1.98358	3.95472	0.450065	1.25505e-06	8.18899e-06	1	1	up	ninjurin-2, transcript variant X1
AARA21_009326	13694	1.98331	3.954	0.309638	2.09468e-11	5.68612e-10	1	1	up	ephrin type-B receptor 4b, transcript variant X7
AARA21_015619	58.0644	2.66524	6.34333	1.28476	0.00166389	0.00465723	1	1	up	bile salt-activated lipase-like
AARA21_009314	220.196	1.982	3.95041	0.267158	1.33743e-14	9.50718e-13	1	1	up	tektin-1
AARA21_013484	13967.2	1.98065	3.94672	0.338481	6.86083e-10	1.14498e-08	1	1	up	SPRY domain-containing SOCS box protein 3, transcript variant X2
AARA21_007579	13.4491	1.97773	3.93872	0.801275	0.0013804	0.00395229	1	1	up	esterase E4-like
AARA21_005799	11.2334	1.97726	3.93746	0.836864	0.00144421	0.00410939	1	1	up	large subunit ribosomal RNA
AARA21_005222	4431.28	1.97618	3.93449	0.319003	8.21925e-11	1.84307e-09	1	1	up	post-GPI attachment to proteins factor 2-like, transcript variant X2
AARA21_011649	25806.5	1.97608	3.93422	0.351034	2.54529e-09	3.59893e-08	1	1	up	protein Gawky-like, transcript variant X3
AARA21_004511	20904.4	2.65528	6.29969	0.464172	9.59834e-10	1.52849e-08	1	1	up	flocculation protein FLO11-like, transcript variant X5
AARA21_004903	2028.23	1.97098	3.92036	0.289477	1.38685e-12	5.39111e-11	1	1	up	protein amalgam-like, transcript variant X3
AARA21_003715	1136.73	1.9695	3.91632	0.664758	0.000324262	0.00110116	1	1	up	retinol-binding protein pinta-like, transcript variant X2
AARA21_010788	802.261	2.65443	6.29595	0.232015	2.29172e-31	4.21251e-28	1	1	up	uncharacterized LOC120900234
AARA21_010972	1012.46	2.6533	6.29107	0.757467	3.24817e-05	0.00014522	1	1	up	luciferin sulfotransferase-like
AARA21_004756	151.547	2.65308	6.2901	0.760529	3.42479e-05	0.000151849	1	1	up	retinoid-inducible serine carboxypeptidase-like
AARA21_012056	502.927	1.96235	3.89697	0.581799	8.6689e-05	0.000343737	1	1	up	Golgi-associated plant pathogenesis-related protein 1-like, transcript variant X5
AARA21_012341	43106.2	1.962	3.89602	0.308113	2.78374e-11	7.12095e-10	1	1	up	terminal nucleotidyltransferase 5C, transcript variant X1
AARA21_003454	7338.35	1.95845	3.88643	0.304786	1.89407e-11	5.24089e-10	1	1	up	G-protein coupled receptor 52, transcript variant X4
AARA21_005046	3958.57	1.9568	3.882	0.378554	3.17465e-08	3.22911e-07	1	1	up	octopamine receptor Oamb-like
AARA21_008337	6114.16	1.95466	3.87625	0.353304	4.44412e-09	5.82901e-08	1	1	up	protein tiptop, transcript variant X1
AARA21_004782	528.893	1.95211	3.8694	0.440901	1.19913e-06	7.86003e-06	1	1	up	adenylate kinase isoenzyme 5, transcript variant X2
AARA21_008884	23.2406	1.94697	3.85563	0.679676	0.000436077	0.00142955	1	1	up	sperm flagellar protein 1-like
AARA21_013606	1028.82	1.94427	3.84843	0.285861	1.46706e-12	5.61804e-11	1	1	up	paired box protein Pax-6, transcript variant X1
AARA21_008709	18474.6	2.63583	6.21531	0.485246	5.05631e-09	6.53865e-08	1	1	up	mucin-5AC-like, transcript variant X3
AARA21_000518	2014.77	1.94151	3.84108	0.276389	2.94517e-13	1.41401e-11	1	1	up	zwei Ig domain protein zig-8, transcript variant X1
AARA21_014255	16038.5	1.94115	3.84013	0.297134	9.57168e-12	2.89105e-10	1	1	up	semaphorin-1A, transcript variant X2
AARA21_008021	5011.85	1.94099	3.8397	0.472952	5.2662e-06	2.89326e-05	1	1	up	protein D2-like
AARA21_009928	4809.98	2.61789	6.13852	0.36453	6.55805e-14	3.87075e-12	1	1	up	fatty acyl-CoA reductase 1-like
AARA21_005708	16367.8	1.94046	3.83827	0.369692	2.13664e-08	2.25901e-07	1	1	up	glycine receptor subunit alpha-2-like
AARA21_005480	50.3287	2.61234	6.11493	0.493699	1.08594e-08	1.25881e-07	1	1	up	LOC120907902
AARA21_010668	49692.7	1.93862	3.83339	0.371757	2.63954e-08	2.73159e-07	1	1	up	regulating synaptic membrane exocytosis protein 2, transcript variant X9
AARA21_000845	248.463	1.93754	3.83051	0.544641	4.59899e-05	0.00019758	1	1	up	facilitated trehalose transporter Tret1-like
AARA21_000568	6627.37	2.5996	6.06117	0.427494	1.14539e-10	2.44406e-09	1	1	up	muscle M-line assembly protein unc-89
AARA21_012472	16016.6	1.92267	3.79123	0.34587	3.98422e-09	5.32346e-08	1	1	up	probable G-protein coupled receptor CG31760, transcript variant X5
AARA21_003884	447.404	2.58999	6.02094	0.76023	4.68236e-05	0.000200806	1	1	up	regulator of microtubule dynamics protein 1-like
AARA21_012297	7835.61	2.58898	6.01675	0.466844	2.67161e-09	3.76101e-08	1	1	up	ABC transporter G family member 20, transcript variant X1
AARA21_013078	204.41	2.5784	5.97278	0.784214	6.95324e-05	0.000283729	1	1	up	fibrillin-1-like
AARA21_013755	348.139	1.91926	3.78229	0.398033	1.83246e-07	1.49894e-06	1	1	up	phenoloxidase-activating factor 2-like, transcript variant X2
AARA21_009548	3498.86	1.91787	3.77863	0.529602	3.76112e-05	0.000165281	1	1	up	delta-like protein A
AARA21_008737	948.393	2.56289	5.90889	0.429882	2.22368e-10	4.3286e-09	1	1	up	GILT-like protein 2, transcript variant X1
AARA21_006019	2785.53	2.53004	5.77589	0.352688	7.31654e-14	4.27956e-12	1	1	up	uncharacterized LOC120899707
AARA21_012132	116.443	2.52932	5.77299	0.368905	5.47551e-13	2.40492e-11	1	1	up	uncharacterized LOC120898221
AARA21_002805	4432.98	1.9043	3.74326	0.32794	9.80694e-10	1.55975e-08	1	1	up	octopamine receptor, transcript variant X5
AARA21_006188	9.96915	1.90293	3.73971	0.726261	0.000952802	0.00285499	1	1	up	potassium/sodium hyperpolarization-activated cyclic nucleotide-gated channel 2-like
AARA21_008845	11315	1.90213	3.73766	0.404344	3.55388e-07	2.67939e-06	1	1	up	protein SERAC1, transcript variant X1
AARA21_003648	1845.17	1.89425	3.71729	0.848101	0.00245075	0.00650718	1	1	up	carbonic anhydrase 1-like
AARA21_009827	35998.1	1.89309	3.7143	0.263604	1.07377e-13	5.92972e-12	1	1	up	triple functional domain protein, transcript variant X1
AARA21_011200	120452	1.89136	3.70985	0.298685	3.72534e-11	9.21806e-10	1	1	up	maternal B9.10 protein-like
AARA21_014069	17519.5	1.88976	3.70575	0.284372	4.64245e-12	1.52773e-10	1	1	up	transcriptional coactivator YAP1
AARA21_005887	48.7706	1.88885	3.7034	0.578786	0.0001292	0.000491547	1	1	up	chromatin assembly factor 1 subunit A-like, transcript variant X1
AARA21_009037	17168.9	1.88624	3.69671	0.297678	3.61902e-11	8.97225e-10	1	1	up	protein kinase C, transcript variant X2
AARA21_000409	127.396	1.88337	3.68937	0.386017	1.35789e-07	1.14517e-06	1	1	up	trichohyalin, transcript variant X2
AARA21_002710	4606.41	2.52501	5.75578	0.757122	6.32833e-05	0.000260983	1	1	up	uncharacterized LOC120897134
AARA21_011418	33063.8	1.88247	3.68707	0.3164	4.07242e-10	7.27775e-09	1	1	up	slit homolog 2 protein, transcript variant X1
AARA21_002209	2988.54	1.8807	3.68253	0.341861	5.16531e-09	6.64621e-08	1	1	up	putative hydroxypyruvate isomerase
AARA21_011866	31499	1.87956	3.67962	0.292833	2.13273e-11	5.77723e-10	1	1	up	RIMS-binding protein 2, transcript variant X11
AARA21_009331	852.288	2.52093	5.73951	0.662808	1.13544e-05	5.77002e-05	1	1	up	uncharacterized LOC120893515
AARA21_009371	13.3261	1.87514	3.66838	1.36415	0.00981234	0.0218246	0	1		putative odorant receptor 83c
AARA21_010876	40.6554	1.87332	3.66376	1.118	0.00691961	0.0161763	0	1		cAMP-dependent protein kinase type I regulatory subunit-like
AARA21_002384	210.908	2.50882	5.69156	0.721933	4.22952e-05	0.000183607	1	1	up	major royal jelly protein 1
AARA21_011855	28690.2	1.86883	3.65236	0.297955	5.59407e-11	1.30638e-09	1	1	up	G protein alpha o subunit, transcript variant X8
AARA21_011911	42.0763	1.86475	3.64205	0.65202	0.000434195	0.00142375	1	1	up	odorant receptor 67c-like
AARA21_012771	2114.31	2.49937	5.6544	0.728167	5.21091e-05	0.000220773	1	1	up	uncharacterized LOC120894607
AARA21_007109	18535.5	1.86255	3.63649	0.670104	0.000620526	0.00194977	1	1	up	carboxypeptidase B-like
AARA21_013275	794.486	1.86184	3.63471	0.506967	3.13208e-05	0.00014042	1	1	up	retinol dehydrogenase 11-like, transcript variant X1
AARA21_000209	16672.1	1.85988	3.62977	0.393008	3.26221e-07	2.49109e-06	1	1	up	peptidoglycan-recognition protein LB
AARA21_003129	5718.53	1.85757	3.62397	0.626725	0.000365053	0.00122289	1	1	up	putative ankyrin repeat protein RF_0381
AARA21_013302	31.3438	1.85678	3.62199	0.719755	0.0010298	0.00305593	1	1	up	nuclear transcription factor Y subunit gamma-like
AARA21_000824	57.2837	1.85634	3.62088	0.44423	3.98282e-06	2.26056e-05	1	1	up	homeobox protein goosecoid-like, transcript variant X2
AARA21_000331	730.291	1.85531	3.6183	0.391552	3.1835e-07	2.44258e-06	1	1	up	paired box protein Pax-7-like, transcript variant X1
AARA21_009203	4593.74	2.49553	5.63936	0.475599	1.47775e-08	1.6434e-07	1	1	up	lysosome membrane protein 2
AARA21_001863	6330.48	1.85176	3.6094	0.337357	5.83707e-09	7.39957e-08	1	1	up	histone H3.v1-like
AARA21_000421	7682.04	1.8517	3.60924	0.481342	1.66542e-05	8.09409e-05	1	1	up	LON peptidase N-terminal domain and RING finger protein 3
AARA21_003194	21.2007	2.4857	5.60107	0.781385	0.00014715	0.00055008	1	1	up	uncharacterized LOC120905692
AARA21_003790	248.811	2.48128	5.58391	0.882036	0.000322892	0.00109708	1	1	up	uncharacterized LOC120894334
AARA21_004438	127005	1.84771	3.59928	0.387476	2.81677e-07	2.19524e-06	1	1	up	probable maltase
AARA21_011298	36532.8	1.84693	3.59735	0.332174	4.20618e-09	5.56227e-08	1	1	up	homeotic protein Sex combs reduced, transcript variant X3
AARA21_006366	2401.98	1.84492	3.59234	0.270521	1.41149e-12	5.47037e-11	1	1	up	GATA zinc finger domain-containing protein 14
AARA21_003835	1568.18	1.84418	3.59048	0.363092	5.8965e-08	5.5705e-07	1	1	up	protein apterous
AARA21_001491	4330.29	1.84054	3.58145	0.364371	6.56913e-08	6.14281e-07	1	1	up	solute carrier family 28 member 3-like
AARA21_004005	19303.9	1.83763	3.57422	0.25486	9.04859e-14	5.0842e-12	1	1	up	myocyte-specific enhancer factor 2, transcript variant X10
AARA21_010489	28284.2	1.83744	3.57376	0.324761	2.42946e-09	3.46946e-08	1	1	up	mucin-19-like
AARA21_011860	7.10541	1.83619	3.57065	1.63285	0.0128962	0.0277253	0	1		mantle protein-like
AARA21_001939	9130.21	1.83536	3.56859	0.277878	6.3824e-12	2.02771e-10	1	1	up	serine-rich adhesin for platelets, transcript variant X1
AARA21_004573	5052.68	2.46739	5.53044	0.441154	2.17967e-09	3.1554e-08	1	1	up	UDP-glucosyltransferase 2-like
AARA21_011779	6247.82	1.83424	3.56584	0.370198	1.08739e-07	9.44093e-07	1	1	up	lipoma-preferred partner homolog
AARA21_013861	590.495	2.4617	5.50866	0.464424	1.1339e-08	1.30617e-07	1	1	up	proline-rich receptor-like protein kinase PERK13
AARA21_004112	4305.19	1.83011	3.55563	0.326777	3.34547e-09	4.5775e-08	1	1	up	hormone receptor 4-like, transcript variant X1
AARA21_002498	2904	1.82976	3.55478	0.452863	7.72037e-06	4.07959e-05	1	1	up	homeotic protein distal-less, transcript variant X4
AARA21_014632	23065.7	2.4572	5.49151	0.314876	6.37984e-16	6.03599e-14	1	1	up	probable cytochrome P450 28a5
AARA21_008720	4798.89	1.82856	3.55182	0.293627	7.59574e-11	1.71464e-09	1	1	up	chaoptin, transcript variant X6
AARA21_009180	15934.3	1.82694	3.54784	0.292057	6.29487e-11	1.45939e-09	1	1	up	fasciclin-3-like
AARA21_012440	13957.6	1.82607	3.54569	0.353464	3.68331e-08	3.66536e-07	1	1	up	ABC transporter G family member 23, transcript variant X1
AARA21_009913	13.9333	1.82516	3.54347	1.02875	0.00573763	0.0137453	0	1		large subunit ribosomal RNA
AARA21_004078	79.8891	2.44824	5.45751	0.465634	1.27783e-08	1.44862e-07	1	1	up	protein masquerade, transcript variant X1
AARA21_010446	18780.1	1.82455	3.54197	0.404584	9.84128e-07	6.57806e-06	1	1	up	zinc finger protein 497, transcript variant X2
AARA21_005950	24.5764	2.44483	5.44463	0.869301	0.000430169	0.00141307	1	1	up	uncharacterized LOC120895178
AARA21_000199	4620.36	2.44308	5.438	0.575526	1.96652e-06	1.21709e-05	1	1	up	trypsin-3-like
AARA21_002767	31639.8	1.81668	3.52269	0.306094	4.77226e-10	8.34303e-09	1	1	up	calcium/calmodulin-dependent protein kinase type 1
AARA21_012519	204.946	2.44002	5.42649	0.591978	3.37095e-06	1.96262e-05	1	1	up	uncharacterized LOC120905611, transcript variant X1
AARA21_002572	13709.5	1.81478	3.51806	0.335806	1.03491e-08	1.21056e-07	1	1	up	1-phosphatidylinositol 4,5-bisphosphate phosphodiesterase epsilon-1-like
AARA21_012107	5.04621	1.8147	3.51785	1.50459	0.0132983	0.0284661	0	1		odorant receptor 47a-like
AARA21_001753	2258.76	1.81469	3.51784	0.345346	2.16368e-08	2.2801e-07	1	1	up	insulin-like growth factor-binding protein complex acid labile subunit
AARA21_008528	7194.07	1.80748	3.50031	0.539653	0.00010975	0.00042423	1	1	up	elongation of very long chain fatty acids protein
AARA21_006555	6.48383	1.80632	3.49749	1.32143	0.0104888	0.0230977	0	1		U5 spliceosomal RNA
AARA21_008463	12.2842	1.80598	3.49666	1.06206	0.00759886	0.0175004	0	1		cilia- and flagella-associated protein 91-like, transcript variant X2
AARA21_004670	9543.63	1.80349	3.49063	0.354559	5.79079e-08	5.47868e-07	1	1	up	whirlin, transcript variant X4
AARA21_014530	4096.52	1.80129	3.48531	0.31979	2.83342e-09	3.94223e-08	1	1	up	midnolin homolog
AARA21_003915	1553.92	1.80052	3.48346	1.4253	0.011404	0.0248748	0	1		mucin-5AC-like
AARA21_003753	31264.6	1.80025	3.4828	0.317072	2.48575e-09	3.53416e-08	1	1	up	centrosomal and chromosomal factor
AARA21_015377	6456.48	1.80025	3.48279	0.267302	2.69707e-12	9.63979e-11	1	1	up	nuclear hormone receptor FTZ-F1 beta, transcript variant X1
AARA21_000801	2465.46	1.79848	3.47852	0.348367	3.83206e-08	3.78994e-07	1	1	up	Down syndrome cell adhesion molecule-like protein Dscam2, transcript variant X5
AARA21_013969	4786.49	1.79797	3.47731	0.340534	2.05712e-08	2.19295e-07	1	1	up	voltage-dependent calcium channel subunit alpha-2/delta-3, transcript variant X1
AARA21_006979	27.8968	1.79553	3.47142	0.472414	1.84931e-05	8.87545e-05	1	1	up	putative odorant receptor 92a, transcript variant X1
AARA21_006349	15.7045	1.79414	3.4681	0.876811	0.00403698	0.0100901	0	1		tubulin polymerization-promoting protein homolog
AARA21_015476	61.3117	1.79411	3.46801	0.478212	2.33707e-05	0.000108403	1	1	up	centrosomal protein of 131 kDa
AARA21_005258	150.278	2.43994	5.42617	0.781286	0.000134167	0.00050849	1	1	up	serine protease 53-like
AARA21_013866	108.918	1.79055	3.45947	1.17708	0.00897844	0.0201756	0	1		proton channel OtopLc-like
AARA21_005498	4835.12	1.78802	3.4534	0.236934	7.50294e-15	5.78086e-13	1	1	up	tumor necrosis factor receptor superfamily member wengen, transcript variant X1
AARA21_009972	38311.9	1.78152	3.43789	0.289792	1.32534e-10	2.76837e-09	1	1	up	syntaxin-binding protein 5, transcript variant X1
AARA21_012833	13.9777	2.43644	5.41304	0.923996	0.000535691	0.00171221	1	1	up	golgin subfamily A member 6-like protein 6
AARA21_006496	17192.3	1.7765	3.42594	0.278259	2.89236e-11	7.38412e-10	1	1	up	lipopolysaccharide-induced tumor necrosis factor-alpha factor homolog
AARA21_003788	733.136	1.77441	3.42097	0.413609	2.70492e-06	1.6158e-05	1	1	up	proteoglycan 4, transcript variant X1
AARA21_000281	19039.4	1.77427	3.42066	0.295917	3.37877e-10	6.17538e-09	1	1	up	protein bunched, class 2/F/G isoform-like, transcript variant X4
AARA21_001725	51.8019	1.77306	3.41778	0.403127	1.58909e-06	1.00922e-05	1	1	up	intraflagellar transport protein 88 homolog
AARA21_010852	1058.3	2.43185	5.39586	0.737768	7.52778e-05	0.000304113	1	1	up	uncharacterized LOC120903981
AARA21_009820	6761.17	1.77196	3.41518	0.272456	1.31835e-11	3.82917e-10	1	1	up	coiled-coil domain-containing protein AGAP005037, transcript variant X1
AARA21_006631	29.9368	1.76996	3.41046	0.54743	0.000162357	0.000598067	1	1	up	RIB43A-like with coiled-coils protein 2
AARA21_003481	8712.95	1.76892	3.408	0.294945	3.30315e-10	6.05437e-09	1	1	up	homeobox protein onecut, transcript variant X4
AARA21_006578	582608	1.76711	3.40372	0.319011	5.14014e-09	6.62707e-08	1	1	up	protein Ycf2-like
AARA21_011643	2181.83	1.76672	3.4028	0.355477	1.07532e-07	9.34876e-07	1	1	up	protein artichoke, transcript variant X2
AARA21_010099	42495.1	1.76641	3.40206	0.290993	2.17885e-10	4.27367e-09	1	1	up	RNA-binding protein Nova-1, transcript variant X13
AARA21_012356	16164.6	1.76523	3.39927	0.253474	5.71122e-13	2.49106e-11	1	1	up	G protein-coupled receptor kinase 1, transcript variant X6
AARA21_014793	20964.7	1.76444	3.39741	0.261196	2.46403e-12	9.03268e-11	1	1	up	guanine nucleotide-binding protein G(s) subunit alpha, transcript variant X4
AARA21_004033	13840.7	2.43076	5.39177	0.30466	1.57164e-16	1.78958e-14	1	1	up	ATP-binding cassette sub-family G member 4
AARA21_012658	25451.8	1.76262	3.39314	0.290285	2.1592e-10	4.24159e-09	1	1	up	brain tumor protein, transcript variant X2
AARA21_009090	20307.7	1.76133	3.39011	0.319935	5.08011e-09	6.56283e-08	1	1	up	neural-cadherin, transcript variant X5
AARA21_013528	16578.3	1.75851	3.38347	0.255338	9.89013e-13	4.0271e-11	1	1	up	feline leukemia virus subgroup C receptor-related protein 2, transcript variant X2
AARA21_009698	5678.69	2.42866	5.38394	0.232919	2.19941e-26	1.88665e-23	1	1	up	ABC transporter G family member 2-like
AARA21_014268	149.012	1.75671	3.37926	0.481484	3.67851e-05	0.000161872	1	1	up	cadherin-89D
AARA21_005001	78.2181	1.75651	3.37879	0.814381	0.00330894	0.00845436	1	1	up	sodium channel protein Nach
AARA21_006000	351.575	1.75599	3.37758	0.2786	4.2117e-11	1.02442e-09	1	1	up	ras-related protein Rap-2b-like, transcript variant X1
AARA21_009697	2460.56	1.75593	3.37744	0.566966	0.000274675	0.000948281	1	1	up	pheromone-binding protein-related protein 6-like, transcript variant X1
AARA21_001849	322.881	2.4221	5.3595	0.996557	0.000863565	0.00261816	1	1	up	uncharacterized LOC120900797, transcript variant X1
AARA21_006518	7136.43	1.75442	3.37391	0.500561	6.79836e-05	0.00027805	1	1	up	chorion peroxidase
AARA21_013517	223.924	1.75356	3.37189	0.506237	7.3761e-05	0.000299018	1	1	up	17-beta-hydroxysteroid dehydrogenase 13-like, transcript variant X2
AARA21_013552	3470.84	1.7523	3.36896	0.783956	0.00290648	0.00753833	1	1	up	protein takeout-like, transcript variant X3
AARA21_002191	41442.7	1.75172	3.36761	0.351643	1.05854e-07	9.22986e-07	1	1	up	vesicle-associated membrane protein 2, transcript variant X7
AARA21_010253	272.723	1.74769	3.3582	0.322751	9.28363e-09	1.10912e-07	1	1	up	tachykinin-like peptides receptor 86C, transcript variant X1
AARA21_014287	103.087	2.41414	5.33001	0.434391	2.82526e-09	3.93852e-08	1	1	up	elongation of very long chain fatty acids protein 7-like, transcript variant X2
AARA21_008950	591.066	1.74112	3.34294	0.252923	9.66158e-13	3.94652e-11	1	1	up	bromodomain-containing protein 4B
AARA21_010672	38.0879	1.74004	3.34044	0.951474	0.00636579	0.0150319	0	1		skin secretory protein xP2-like
AARA21_014136	11.2475	1.73976	3.3398	0.782588	0.0025426	0.00671367	1	1	up	U2 spliceosomal RNA
AARA21_015143	26758.4	1.73934	3.33883	0.281555	1.14751e-10	2.44454e-09	1	1	up	glutamate decarboxylase
AARA21_007009	1971.4	1.73896	3.33795	0.382498	8.74135e-07	5.9104e-06	1	1	up	retinaldehyde-binding protein 1-like
AARA21_008954	1337.86	1.73547	3.32989	0.364661	3.12294e-07	2.40328e-06	1	1	up	solute carrier family 28 member 3-like, transcript variant X1
AARA21_014739	2975.01	1.73486	3.32848	0.308386	3.12068e-09	4.28993e-08	1	1	up	abscission/NoCut checkpoint regulator
AARA21_013924	407.002	2.401	5.2817	0.380168	2.6317e-11	6.78069e-10	1	1	up	suppressor APC domain-containing protein 2
AARA21_009830	67.6371	2.39201	5.24889	0.660627	2.30973e-05	0.000107368	1	1	up	uncharacterized LOC120906610
AARA21_014458	55906.3	1.73271	3.32351	0.320158	1.08225e-08	1.25566e-07	1	1	up	protein boule, transcript variant X2
AARA21_012719	24606.5	1.73069	3.31885	0.295683	8.09288e-10	1.31313e-08	1	1	up	serine/arginine repetitive matrix protein 2, transcript variant X5
AARA21_012283	7382.74	2.39009	5.24189	0.289065	1.48299e-17	2.29899e-15	1	1	up	serine protease inhibitor 28Dc-like
AARA21_014005	3513.91	1.72954	3.31621	0.249098	6.64832e-13	2.82323e-11	1	1	up	MOXD1 homolog 2-like
AARA21_001553	2349.65	2.38855	5.2363	0.357934	2.73432e-12	9.74585e-11	1	1	up	uncharacterized LOC120893388
AARA21_000800	17.3359	1.72735	3.31119	0.751866	0.00261007	0.00686088	1	1	up	chromatin modification-related protein eaf-1-like
AARA21_002151	487.014	1.72607	3.30824	0.809586	0.00356758	0.00903979	1	1	up	venom serine protease-like
AARA21_011403	2052.7	1.72399	3.30348	0.604467	0.000592574	0.00187152	1	1	up	protein spaetzle 3, transcript variant X3
AARA21_015700	794.097	2.38086	5.20846	0.680864	3.96421e-05	0.000173495	1	1	up	myb-like protein AA
AARA21_004779	41163.6	1.72046	3.2954	0.284694	2.67548e-10	5.06256e-09	1	1	up	dorsal-ventral patterning protein Sog
AARA21_005657	151.625	2.37387	5.18329	0.570954	2.87302e-06	1.7012e-05	1	1	up	longitudinals lacking protein, isoforms A/B/D/L
AARA21_007118	2937.04	1.71907	3.29225	0.303158	2.44935e-09	3.49399e-08	1	1	up	melatonin receptor type 1B-like
AARA21_007614	21.0129	1.71683	3.28713	1.71582	0.0147568	0.0311886	0	1		U1 spliceosomal RNA
AARA21_001315	1594.47	2.37201	5.1766	0.413364	9.94224e-10	1.57545e-08	1	1	up	septation initiation network scaffold protein cdc11-like
AARA21_010683	25932.2	1.71522	3.28347	0.204562	9.31222e-18	1.50272e-15	1	1	up	lipopolysaccharide-induced tumor necrosis factor-alpha factor-like
AARA21_004707	22.7909	1.71498	3.28293	0.63128	0.000805778	0.00246036	1	1	up	odorant receptor 22c-like
AARA21_003285	115038	1.71453	3.2819	0.252646	1.00746e-12	4.0764e-11	1	1	up	sodium/potassium-transporting ATPase subunit beta-2, transcript variant X2
AARA21_006024	11783.8	1.71407	3.28085	0.320648	1.57395e-08	1.74586e-07	1	1	up	potassium channel subfamily T member 2, transcript variant X7
AARA21_003637	5840.21	1.71325	3.279	0.321546	1.57848e-08	1.74938e-07	1	1	up	carbohydrate sulfotransferase 11-like, transcript variant X2
AARA21_005051	39917.6	1.71258	3.27747	0.318804	1.37237e-08	1.5422e-07	1	1	up	poly(rC)-binding protein 3, transcript variant X10
AARA21_013427	11699.4	1.71193	3.276	0.340128	8.35305e-08	7.55828e-07	1	1	up	cAMP-specific 3',5'-cyclic phosphodiesterase-like, transcript variant X1
AARA21_013324	58.7888	1.70989	3.27135	0.777476	0.00317771	0.00815373	1	1	up	endochitinase-like
AARA21_005327	64.4554	1.70338	3.25663	0.507629	0.000108793	0.000420877	1	1	up	gustatory and odorant receptor 24
AARA21_011157	92.0842	2.36158	5.13935	0.651186	2.48746e-05	0.000114349	1	1	up	uncharacterized LOC120902469
AARA21_014391	2997.77	1.70254	3.25474	0.338795	9.30735e-08	8.29347e-07	1	1	up	UDP-glycosyltransferase UGT5-like
AARA21_012130	492.475	2.35342	5.11035	0.629732	1.6603e-05	8.07374e-05	1	1	up	cytochrome P450 4C1-like
AARA21_005388	4382.9	2.35325	5.10974	0.227673	4.92389e-26	3.95973e-23	1	1	up	probable cytochrome P450 6a14
AARA21_010199	4491.34	1.70094	3.25112	0.276247	1.31403e-10	2.7492e-09	1	1	up	cGMP-specific 3',5'-cyclic phosphodiesterase, transcript variant X1
AARA21_000361	19287.2	2.35088	5.10135	0.27412	1.11664e-18	2.21044e-16	1	1	up	cell surface glycoprotein 1-like
AARA21_015364	29898.3	1.69836	3.24532	0.285545	4.93626e-10	8.5715e-09	1	1	up	peripheral plasma membrane protein CASK, transcript variant X5
AARA21_000923	19.1693	2.33579	5.04827	0.636297	2.49316e-05	0.000114488	1	1	up	pickpocket protein 28-like
AARA21_003710	26.3305	1.69602	3.24005	0.620587	0.00091773	0.00276221	1	1	up	large subunit ribosomal RNA
AARA21_009306	13168.6	1.69506	3.23791	0.250337	2.33586e-12	8.63663e-11	1	1	up	prominin-like protein, transcript variant X4
AARA21_009302	1241.5	2.33568	5.04788	0.547066	1.88568e-06	1.17326e-05	1	1	up	uncharacterized LOC120894435
AARA21_005166	1343.81	1.69053	3.22776	0.3392	1.06174e-07	9.24352e-07	1	1	up	alpha-2Db adrenergic receptor, transcript variant X5
AARA21_015229	40446	1.68233	3.20945	0.301378	4.34978e-09	5.72307e-08	1	1	up	AF4/FMR2 family member lilli, transcript variant X2
AARA21_011714	13028.9	1.68146	3.20753	0.279504	3.28901e-10	6.03704e-09	1	1	up	proton channel OtopLc, transcript variant X3
AARA21_006230	7.65175	1.6801	3.2045	0.738518	0.00254345	0.00671452	1	1	up	large subunit ribosomal RNA
AARA21_005459	3295.45	2.33089	5.03115	0.436304	9.66878e-09	1.14556e-07	1	1	up	laccase 1-like, transcript variant X1
AARA21_000205	4092.59	1.67934	3.20282	0.32334	3.67882e-08	3.66373e-07	1	1	up	cilia- and flagella-associated protein 298, transcript variant X5
AARA21_000530	910.503	2.33056	5.03002	0.569612	4.11221e-06	2.32887e-05	1	1	up	uncharacterized LOC120898712
AARA21_015647	23479.3	2.33007	5.02831	0.20541	9.54258e-31	1.5348e-27	1	1	up	NADH dehydrogenase [ubiquinone] 1 beta subcomplex subunit 4
AARA21_011836	2220.18	1.67187	3.18627	0.283339	6.56243e-10	1.1009e-08	1	1	up	putative alpha-L-fucosidase
AARA21_006689	124.548	1.67106	3.18448	0.424894	1.28612e-05	6.44162e-05	1	1	up	LIM/homeobox protein Awh-like
AARA21_012128	4286.06	1.67056	3.18338	0.332131	6.46493e-08	6.05417e-07	1	1	up	serine/threonine-protein kinase BRSK2, transcript variant X1
AARA21_000721	3774.8	1.67051	3.18327	0.319869	3.18521e-08	3.23473e-07	1	1	up	progestin and adipoQ receptor family member 4, transcript variant X3
AARA21_007145	1089.44	2.32618	5.01476	0.307907	4.4153e-15	3.61858e-13	1	1	up	glutathione S-transferase D7
AARA21_014753	2291.27	2.31952	4.99165	0.345715	2.25932e-12	8.40192e-11	1	1	up	pupal cuticle protein 27
AARA21_009565	107.801	2.31597	4.97939	0.6441	3.2096e-05	0.000143645	1	1	up	uncharacterized LOC120905984
AARA21_002702	485.947	1.66028	3.16078	0.491949	0.000123937	0.000474754	1	1	up	pollen-specific leucine-rich repeat extensin-like protein 1
AARA21_002806	3.14485	1.65939	3.15883	2.28463	0.0163995	0.0342719	0	1		general odorant-binding protein 69-like
AARA21_014096	8065.2	2.31333	4.97028	0.504505	4.63926e-07	3.37632e-06	1	1	up	sphingomyelin phosphodiesterase-like
AARA21_001221	15.3652	1.65913	3.15825	1.31134	0.0129761	0.027869	0	1		serine protease grass-like
AARA21_008262	23581	1.65836	3.15658	0.266467	9.0699e-11	1.99833e-09	1	1	up	xanthine dehydrogenase/oxidase-like, transcript variant X1
AARA21_005289	303.554	1.65661	3.15275	0.529415	0.000268952	0.000930271	1	1	up	phenoloxidase-activating factor 1-like
AARA21_014713	2529.85	1.65604	3.15149	0.353252	4.90602e-07	3.56442e-06	1	1	up	forkhead box protein I2, transcript variant X3
AARA21_005936	1345.88	1.65559	3.15052	0.687349	0.00212771	0.00575273	1	1	up	lysosomal alpha-mannosidase-like, transcript variant X2
AARA21_012733	26239.7	1.65393	3.14689	0.309978	1.77445e-08	1.94149e-07	1	1	up	histone-lysine N-methyltransferase trithorax, transcript variant X1
AARA21_015115	4580.87	1.65296	3.14478	0.330597	1.0446e-07	9.14342e-07	1	1	up	turripeptide Pal9.2-like
AARA21_000536	3123.19	1.65205	3.14279	0.31627	3.26544e-08	3.29614e-07	1	1	up	transmembrane protein 198
AARA21_013092	10836.4	1.65126	3.14109	0.298176	5.72088e-09	7.27486e-08	1	1	up	protein sax-3-like, transcript variant X2
AARA21_006592	887.264	2.31112	4.96268	0.359477	1.25486e-11	3.67798e-10	1	1	up	protein peste-like
AARA21_014482	6271.74	2.30737	4.94981	0.566111	4.4866e-06	2.51496e-05	1	1	up	uncharacterized LOC120897712
AARA21_009177	9145.2	1.64969	3.13766	0.296257	4.79824e-09	6.24888e-08	1	1	up	alpha-catulin, transcript variant X12
AARA21_013101	9002.9	1.64904	3.13624	0.591409	0.000791228	0.00241995	1	1	up	chromosome transmission fidelity protein 8 homolog
AARA21_010665	23576.1	1.64746	3.13281	0.215993	4.64533e-15	3.783e-13	1	1	up	breast carcinoma-amplified sequence 3 homolog, transcript variant X7
AARA21_005796	27243.2	1.64564	3.12886	0.314959	3.25986e-08	3.29495e-07	1	1	up	teneurin-m, transcript variant X3
AARA21_004339	43621.2	1.64516	3.12783	0.277313	5.6128e-10	9.56554e-09	1	1	up	polyubiquitin-C, transcript variant X3
AARA21_004921	497.485	2.30072	4.92703	0.480812	1.72139e-07	1.418e-06	1	1	up	protein obstructor-E-like
AARA21_010663	16.3977	2.29499	4.90749	0.9974	0.00149186	0.00423095	1	1	up	uncharacterized LOC120896251
AARA21_003563	14065.4	1.63892	3.11432	0.272442	3.41123e-10	6.21677e-09	1	1	up	filaggrin-like
AARA21_015381	24285.5	1.63853	3.11348	0.278891	8.08335e-10	1.31313e-08	1	1	up	TGF-beta receptor type-1, transcript variant X5
AARA21_001256	1042.24	2.29413	4.90457	0.72279	0.000126924	0.000483942	1	1	up	arylsulfatase B-like, transcript variant X1
AARA21_005100	8698.94	1.63675	3.10964	0.260678	6.54498e-11	1.50922e-09	1	1	up	double-stranded RNA-specific editase Adar, transcript variant X4
AARA21_000222	4.45073	1.63498	3.10583	1.57328	0.0171329	0.0355505	0	1		histidine-rich protein PFHRP-II-like
AARA21_007879	10040.9	1.63493	3.10573	0.419402	1.66736e-05	8.09887e-05	1	1	up	integrin alpha-PS3-like, transcript variant X1
AARA21_012431	37.3824	2.29229	4.89832	0.537226	2.15681e-06	1.32151e-05	1	1	up	uncharacterized LOC120897553
AARA21_003802	6136.77	1.63334	3.1023	0.2363	1.09621e-12	4.36687e-11	1	1	up	solute carrier family 23 member 2, transcript variant X2
AARA21_011404	39.0766	1.63318	3.10196	0.568189	0.000531708	0.00170229	1	1	up	nuclear receptor subfamily 2 group E member 1-like
AARA21_014607	47938.1	1.63306	3.1017	0.330395	1.44874e-07	1.21281e-06	1	1	up	serine-rich adhesin for platelets, transcript variant X7
AARA21_002846	9.80833	2.2818	4.86286	1.00487	0.00225023	0.00603704	1	1	up	cell wall integrity and stress response component 2-like
AARA21_001031	13851.5	1.63081	3.09686	0.219865	2.34853e-14	1.57388e-12	1	1	up	high affinity cGMP-specific 3',5'-cyclic phosphodiesterase 9A, transcript variant X2
AARA21_014288	5500.23	1.62991	3.09493	0.513625	0.000243997	0.00085373	1	1	up	microtubule-associated protein futsch, transcript variant X1
AARA21_010811	2150.37	1.62941	3.09387	0.298289	8.51945e-09	1.02929e-07	1	1	up	irregular chiasm C-roughest protein-like, transcript variant X4
AARA21_011827	96.119	2.28152	4.86189	0.60129	1.24434e-05	6.2567e-05	1	1	up	uncharacterized LOC120901392
AARA21_013057	5.08539	1.62881	3.09258	1.85409	0.0169693	0.0352623	0	1		tRNA-Ser
AARA21_013487	5409.24	1.62843	3.09176	0.317318	5.41457e-08	5.16451e-07	1	1	up	polycomb group protein Psc
AARA21_010686	105.444	1.62801	3.09087	0.336549	2.00788e-07	1.62487e-06	1	1	up	intraflagellar transport protein 52 homolog
AARA21_014435	21154.3	2.28052	4.85853	0.330013	5.49768e-13	2.40608e-11	1	1	up	cytochrome P450 6a22-like
AARA21_006352	1378.89	2.27343	4.83471	0.44319	3.11104e-08	3.17564e-07	1	1	up	uncharacterized LOC120893378
AARA21_007414	501.309	2.27215	4.83041	0.277208	2.69219e-17	3.80664e-15	1	1	up	glucose dehydrogenase [FAD, quinone]
AARA21_011474	1239.92	1.62148	3.07691	0.350219	6.79234e-07	4.72161e-06	1	1	up	ecdysone-induced protein 74EF-like
AARA21_010963	3110.81	2.27094	4.82638	0.456636	7.4522e-08	6.85052e-07	1	1	up	protein obstructor-E-like
AARA21_014911	29683.2	1.61619	3.06565	0.272703	6.0948e-10	1.02916e-08	1	1	up	translational regulator orb2, transcript variant X5
AARA21_005083	28688	1.61396	3.06092	0.346814	6.14763e-07	4.31777e-06	1	1	up	protein cycle, transcript variant X5
AARA21_003833	4091	1.61348	3.0599	0.242462	5.51789e-12	1.78838e-10	1	1	up	clavesin-2-like, transcript variant X1
AARA21_001223	1515.94	2.26687	4.81277	0.341719	3.3173e-12	1.13823e-10	1	1	up	regulator of hypoxia-inducible factor 1-like
AARA21_000731	2756.89	1.61222	3.05722	0.306601	2.76759e-08	2.8557e-07	1	1	up	LIM/homeobox protein Lhx1
AARA21_002247	4865.52	1.61217	3.05712	0.312892	4.91403e-08	4.73624e-07	1	1	up	general transcription factor IIF subunit 1
AARA21_012381	164.5	1.61133	3.05534	0.311678	3.87964e-08	3.83111e-07	1	1	up	protein stum, transcript variant X2
AARA21_008853	2759.05	1.61113	3.05492	0.302807	1.95331e-08	2.09444e-07	1	1	up	insulin-like growth factor-binding protein complex acid labile subunit, transcript variant X2
AARA21_012482	3573.78	2.2641	4.80355	0.262985	8.66729e-19	1.74253e-16	1	1	up	sodium-coupled monocarboxylate transporter 1, transcript variant X4
AARA21_001187	25332.2	1.60792	3.04811	0.244003	8.83142e-12	2.69275e-10	1	1	up	MOB kinase activator-like 2, transcript variant X7
AARA21_003132	952.061	1.60728	3.04676	0.332017	2.39315e-07	1.89347e-06	1	1	up	tyrosine-protein kinase Drl, transcript variant X1
AARA21_000571	16.3641	1.60672	3.04559	0.888302	0.00736859	0.0170555	0	1		odorant receptor 67d-like
AARA21_008042	1873.61	2.25871	4.78564	0.400277	1.82331e-09	2.69662e-08	1	1	up	leucine-rich repeat neuronal protein 2
AARA21_012085	3270.03	2.25099	4.7601	0.338208	3.29574e-12	1.1369e-10	1	1	up	bromodomain-containing protein DDB_G0280777, transcript variant X4
AARA21_000786	4834.18	1.60535	3.04271	0.35374	1.0612e-06	7.03839e-06	1	1	up	medium-chain acyl-CoA ligase ACSF2, mitochondrial
AARA21_004992	18459.2	1.60529	3.04256	0.297638	1.34525e-08	1.51571e-07	1	1	up	elongation of very long chain fatty acids protein
AARA21_003970	6099.65	1.60314	3.03803	0.237089	2.54105e-12	9.24557e-11	1	1	up	death-associated inhibitor of apoptosis 1-like
AARA21_005629	34.6849	1.60217	3.036	0.876177	0.00769783	0.0176903	0	1		protein deadpan-like
AARA21_008034	8193.44	1.60142	3.03441	0.272572	8.35086e-10	1.34819e-08	1	1	up	homeobox protein cut, transcript variant X3
AARA21_007191	14140	1.6004	3.03226	0.300131	1.90994e-08	2.06341e-07	1	1	up	synaptogyrin, transcript variant X1
AARA21_009175	20.73	2.24405	4.73726	0.646928	5.27494e-05	0.000223118	1	1	up	adult cuticle protein 1-like
AARA21_005119	4976.59	1.59865	3.0286	0.29027	6.90824e-09	8.54764e-08	1	1	up	probable phospholipid-transporting ATPase IF, transcript variant X3
AARA21_005356	2163.12	1.59792	3.02707	0.727855	0.00416403	0.0103573	0	1		MAGE-like protein 2
AARA21_005908	6540.45	1.59651	3.0241	0.273395	1.03735e-09	1.63848e-08	1	1	up	protein midgut expression 1-like, transcript variant X2
AARA21_010168	11658.2	1.59636	3.0238	0.31709	9.36665e-08	8.33476e-07	1	1	up	E3 ubiquitin-protein ligase SMURF2, transcript variant X4
AARA21_004647	8737.99	1.5933	3.01738	0.272013	8.30585e-10	1.34261e-08	1	1	up	bone morphogenetic protein receptor type-1B, transcript variant X1
AARA21_009968	16.9704	1.59044	3.0114	0.651936	0.00222369	0.00597581	1	1	up	probable E3 ubiquitin-protein ligase XERICO
AARA21_014334	937.757	2.24124	4.72804	0.688123	0.000102018	0.000397656	1	1	up	immunoglobulin A1 protease autotransporter-like, transcript variant X1
AARA21_004997	69974.9	1.58898	3.00837	0.268157	5.39026e-10	9.25988e-09	1	1	up	mushroom body large-type Kenyon cell-specific protein 1-like, transcript variant X4
AARA21_002875	10701.6	1.58834	3.00704	0.280272	2.90458e-09	4.02728e-08	1	1	up	potassium voltage-gated channel subfamily KQT member 1, transcript variant X1
AARA21_008090	47.3515	1.58722	3.0047	0.481483	0.000172407	0.000628608	1	1	up	zinc finger protein 397-like, transcript variant X2
AARA21_002800	7127.84	1.58635	3.00288	0.240913	8.06535e-12	2.49464e-10	1	1	up	aspartic and glutamic acid-rich protein, transcript variant X9
AARA21_004136	552.844	2.24007	4.7242	0.487491	4.47644e-07	3.27449e-06	1	1	up	chitin synthase chs-2, transcript variant X2
AARA21_012317	6628.51	1.58359	2.99715	0.329418	2.94565e-07	2.28737e-06	1	1	up	fatty-acid amide hydrolase 2-B-like
AARA21_001715	2.84441	1.5832	2.99633	1.55698	0.018465	0.0378448	0	1		large subunit ribosomal RNA
AARA21_000837	2922.59	1.58098	2.99172	0.297421	2.08632e-08	2.21148e-07	1	1	up	otoferlin-like
AARA21_006035	6902.16	1.57983	2.98936	0.221704	2.13405e-13	1.08964e-11	1	1	up	differentially expressed in FDCP 6-like, transcript variant X3
AARA21_006457	13274	1.57853	2.98666	0.348143	1.12721e-06	7.43401e-06	1	1	up	protein Aster-B-like, transcript variant X5
AARA21_009064	9.0968	1.57812	2.98581	1.52843	0.0169139	0.0351703	0	1		odorant receptor 46a-like
AARA21_014059	34723.3	2.2389	4.72038	0.40257	3.06444e-09	4.23071e-08	1	1	up	chymotrypsin-2-like
AARA21_012404	29528.3	1.57512	2.97961	0.248897	5.10894e-11	1.22209e-09	1	1	up	bromodomain-containing protein DDB_G0270170, transcript variant X3
AARA21_015644	315.157	2.23026	4.6922	0.421149	1.23105e-08	1.39929e-07	1	1	up	protein lethal(3)malignant blood neoplasm 1
AARA21_010438	35569.4	1.57466	2.97865	0.366761	2.84308e-06	1.6858e-05	1	1	up	neural/ectodermal development factor IMP-L2, transcript variant X2
AARA21_012571	56.781	1.57439	2.97809	0.542928	0.000601046	0.00189597	1	1	up	putative polypeptide N-acetylgalactosaminyltransferase 9
AARA21_006316	100428	1.57226	2.9737	0.284339	6.58144e-09	8.23768e-08	1	1	up	heterogeneous nuclear ribonucleoprotein R, transcript variant X13
AARA21_001040	247.704	1.57153	2.97219	0.331243	3.88786e-07	2.89162e-06	1	1	up	zwei Ig domain protein zig-8-like, transcript variant X4
AARA21_004172	26.6625	1.5702	2.96947	1.49633	0.0182247	0.0374775	0	1		classical arabinogalactan protein 10-like
AARA21_013992	1119.88	2.22983	4.69079	0.551141	5.34487e-06	2.93148e-05	1	1	up	uncharacterized LOC120895313
AARA21_006780	5726.31	2.22553	4.67683	0.40912	6.14361e-09	7.74999e-08	1	1	up	uncharacterized LOC120903843
AARA21_011773	20.9872	1.56983	2.96869	0.762734	0.00539388	0.0130139	0	1		large subunit ribosomal RNA
AARA21_000103	47487.8	1.56728	2.96346	0.290714	1.43751e-08	1.60421e-07	1	1	up	disks large 1 tumor suppressor protein, transcript variant X9
AARA21_010369	976.189	1.56671	2.96228	0.364632	3.30956e-06	1.93476e-05	1	1	up	potassium voltage-gated channel subfamily KQT member 1-like, transcript variant X4
AARA21_011340	14667	1.56494	2.95865	0.316495	1.51498e-07	1.2617e-06	1	1	up	clavesin-1, transcript variant X6
AARA21_005785	5.66632	1.564	2.95674	0.921776	0.0099663	0.0221097	0	1		large subunit ribosomal RNA
AARA21_004128	1044.26	1.56268	2.95402	0.185908	1.21121e-17	1.92403e-15	1	1	up	glycine receptor subunit alpha-2, transcript variant X5
AARA21_006034	401.43	1.56222	2.95309	0.579639	0.00112005	0.00329185	1	1	up	phenoloxidase-activating factor 1-like
AARA21_013822	29349.9	1.56213	2.9529	0.33353	5.66806e-07	4.02045e-06	1	1	up	protein yippee-like CG15309, transcript variant X5
AARA21_004414	5291.23	1.55972	2.94797	0.325937	3.41097e-07	2.58322e-06	1	1	up	nephrin-like, transcript variant X1
AARA21_011717	27933.5	1.55953	2.94758	0.324975	3.20786e-07	2.45834e-06	1	1	up	elongation of very long chain fatty acids protein 6, transcript variant X2
AARA21_000239	283.264	1.5592	2.94691	0.302154	4.41399e-08	4.3059e-07	1	1	up	cilia- and flagella-associated protein 36
AARA21_014685	95.3395	1.55823	2.94493	0.502223	0.000316179	0.0010762	1	1	up	trypsin-1-like
AARA21_000585	2327.61	1.55722	2.94287	0.280223	5.42218e-09	6.92822e-08	1	1	up	potassium voltage-gated channel protein Shaw, transcript variant X9
AARA21_007522	8499.81	1.5572	2.94282	0.341404	7.94909e-07	5.42317e-06	1	1	up	lipase maturation factor 2-like, transcript variant X4
AARA21_003333	138.431	1.55693	2.94228	0.450055	8.80148e-05	0.000348136	1	1	up	homeotic protein proboscipedia-like
AARA21_014676	339.997	1.55575	2.93987	0.306478	7.77451e-08	7.11017e-07	1	1	up	ADP-ribosylation factor-like protein 6, transcript variant X1
AARA21_012704	1783.87	1.55558	2.93951	0.284419	1.1175e-08	1.28959e-07	1	1	up	ankyrin repeat and ELMO domain-containing protein D, transcript variant X2
AARA21_006944	30.5811	1.55428	2.93688	0.543789	0.000597108	0.00188447	1	1	up	protein phosphatase 1 regulatory subunit 42-like
AARA21_003776	56026	1.55163	2.93148	0.279703	6.06027e-09	7.65235e-08	1	1	up	casein kinase I, transcript variant X1
AARA21_011590	6366.05	1.54916	2.92646	0.24583	6.17092e-11	1.43324e-09	1	1	up	calmodulin, transcript variant X2
AARA21_010773	3234.18	1.54832	2.92477	0.240012	2.31081e-11	6.15594e-10	1	1	up	LIM homeobox transcription factor 1-beta, transcript variant X1
AARA21_004904	11759	1.54544	2.91894	0.795532	0.00719408	0.0167147	0	1		opsin-1-like
AARA21_004212	21629.9	1.54449	2.91702	0.249211	1.21955e-10	2.57246e-09	1	1	up	AF4/FMR2 family member lilli, transcript variant X1
AARA21_002879	2274.45	1.5426	2.91319	1.24255	0.0182516	0.037509	0	1		peptidoglycan-recognition protein SC2-like
AARA21_010271	8.04471	1.54083	2.90961	0.984904	0.013046	0.0279957	0	1		cilia- and flagella-associated protein 206
AARA21_008873	92.2764	1.54007	2.90809	0.431432	6.5488e-05	0.00026904	1	1	up	TBC1 domain family member 19
AARA21_014717	23227.4	1.53937	2.90667	0.411713	3.50235e-05	0.000154862	1	1	up	transcription factor kayak, transcript variant X1
AARA21_007203	2107.41	2.21847	4.654	0.53564	3.49766e-06	2.02631e-05	1	1	up	uncharacterized LOC120895697
AARA21_001484	5443.59	1.53687	2.90165	0.207468	2.74566e-14	1.81171e-12	1	1	up	cystatin-like protein, transcript variant X2
AARA21_004528	209.256	2.21358	4.63824	0.264728	5.3912e-18	9.24915e-16	1	1	up	heterochromatin-associated protein MENT-like
AARA21_005431	585.189	1.53575	2.89939	0.453827	0.000125708	0.000479825	1	1	up	17-beta-hydroxysteroid dehydrogenase 13-like
AARA21_004504	391.735	1.53499	2.89786	0.404449	2.73072e-05	0.000124244	1	1	up	cyclin-dependent kinase-like 1, transcript variant X2
AARA21_004466	693.78	1.53453	2.89693	0.278149	7.03257e-09	8.64261e-08	1	1	up	dynein intermediate chain 3, ciliary-like
AARA21_011209	123937	2.21273	4.63552	0.204904	4.4888e-28	4.81312e-25	1	1	up	cytochrome b-c1 complex subunit 7-like
AARA21_000227	22652.1	1.5317	2.89127	0.343639	1.7136e-06	1.07977e-05	1	1	up	ataxin-8-like
AARA21_005095	288.376	1.53009	2.88803	0.664873	0.00320667	0.00821425	1	1	up	fatty acyl-CoA reductase wat-like
AARA21_007105	8729.54	1.52964	2.88714	0.346555	1.76173e-06	1.10469e-05	1	1	up	beta-1,4-glucuronyltransferase 1, transcript variant X1
AARA21_004993	515.547	1.52866	2.88518	0.215688	2.60285e-13	1.28383e-11	1	1	up	neuropeptide F receptor, transcript variant X3
AARA21_013489	3234.6	2.2035	4.60596	0.571033	1.14538e-05	5.81595e-05	1	1	up	uncharacterized LOC120904056
AARA21_006042	70857.1	2.19804	4.58854	0.370477	3.68197e-10	6.64459e-09	1	1	up	cytochrome c oxidase subunit 7A1, mitochondrial
AARA21_013611	21.7267	1.52669	2.88124	0.677034	0.00387775	0.00972423	1	1	up	odorant receptor 43a-like
AARA21_013172	1765.18	1.52566	2.87919	0.191576	3.6335e-16	3.68128e-14	1	1	up	neuropeptides capa receptor, transcript variant X4
AARA21_005624	4656.2	2.19411	4.57606	0.27099	7.12286e-17	8.98528e-15	1	1	up	putative gamma-glutamylcyclotransferase CG2811
AARA21_002157	355.065	1.52489	2.87765	3.13213	0.0107315	0.0235556	0	1		peritrophin-1-like
AARA21_009105	26.8337	1.52138	2.87065	0.557133	0.000975132	0.002914	1	1	up	sodium channel and clathrin linker 1-like, transcript variant X1
AARA21_010193	215.796	1.52032	2.86854	0.446502	0.000120971	0.000464084	1	1	up	mucin-5AC-like, transcript variant X1
AARA21_010564	69112	1.5197	2.86731	0.25737	7.7354e-10	1.26953e-08	1	1	up	myb-like protein Q, transcript variant X5
AARA21_014829	6296.05	1.51737	2.86268	0.61783	0.00224617	0.00602867	1	1	up	sodium-dependent nutrient amino acid transporter 1-like, transcript variant X1
AARA21_008602	2452.68	2.19051	4.56467	0.535675	4.6101e-06	2.57457e-05	1	1	up	kinesin-like protein KIF12, transcript variant X3
AARA21_009671	11323	1.51675	2.86145	0.346963	2.44855e-06	1.47983e-05	1	1	up	galectin-7-like, transcript variant X1
AARA21_000904	10840.9	1.50951	2.84713	0.305929	1.72528e-07	1.42029e-06	1	1	up	zinc finger protein rotund-like, transcript variant X6
AARA21_012825	16379.1	1.50882	2.84578	0.254206	6.45415e-10	1.08556e-08	1	1	up	active breakpoint cluster region-related protein, transcript variant X1
AARA21_008791	519.754	1.50681	2.8418	0.522022	0.000727286	0.00224574	1	1	up	NPC intracellular cholesterol transporter 2
AARA21_013335	11742.4	1.50666	2.84152	0.200719	1.35693e-14	9.54081e-13	1	1	up	ion transport peptide, transcript variant X1
AARA21_013980	785.567	1.50538	2.83898	0.367272	8.34687e-06	4.36759e-05	1	1	up	L-dopachrome tautomerase yellow-f-like
AARA21_005131	10711.9	1.50493	2.8381	0.242497	1.20181e-10	2.53919e-09	1	1	up	chromatin modification-related protein eaf-1-like
AARA21_002196	1630.63	1.50462	2.8375	0.626977	0.00273275	0.0071439	1	1	up	mucin-5AC
AARA21_014233	91.6857	2.18827	4.55758	0.509456	1.67306e-06	1.05733e-05	1	1	up	uncharacterized LOC120906857, transcript variant X2
AARA21_008153	20606.5	1.50118	2.83074	0.265262	3.35597e-09	4.584e-08	1	1	up	protein enabled, transcript variant X5
AARA21_008761	645.45	2.18607	4.55065	0.505301	1.60566e-06	1.01824e-05	1	1	up	lipase 3-like
AARA21_002559	371.445	1.4995	2.82744	0.394793	2.79523e-05	0.000126954	1	1	up	protein O-mannosyl-transferase 2
AARA21_011415	6545.13	1.49841	2.82532	0.299083	1.17961e-07	1.01322e-06	1	1	up	coronin-7, transcript variant X2
AARA21_008984	113.33	2.1669	4.49056	0.342421	2.54704e-11	6.62076e-10	1	1	up	uncharacterized LOC120906807
AARA21_012829	6078.53	1.49811	2.82473	0.182228	4.02261e-17	5.28153e-15	1	1	up	bicaudal D-related protein homolog, transcript variant X4
AARA21_010216	530.69	2.16485	4.48421	0.526014	4.18927e-06	2.3673e-05	1	1	up	DNA translocase FtsK
AARA21_003533	12578.7	1.49564	2.8199	0.208733	1.75974e-13	9.13008e-12	1	1	up	ubiquitin carboxyl-terminal hydrolase CYLD, transcript variant X4
AARA21_011002	218.319	2.16373	4.48073	0.629924	6.30526e-05	0.000260115	1	1	up	F-box/LRR-repeat protein 15-like, transcript variant X2
AARA21_008548	21044.1	1.49189	2.81257	0.221337	3.58713e-12	1.21783e-10	1	1	up	serine/threonine-protein kinase Doa-like
AARA21_003952	3622.34	1.49123	2.81128	0.260835	2.71644e-09	3.81577e-08	1	1	up	transient receptor potential-gamma protein, transcript variant X2
AARA21_009713	28.0381	1.48935	2.80763	0.447212	0.000148397	0.00055394	1	1	up	ionotropic receptor 93a
AARA21_015472	4.56096	1.4889	2.80675	1.02748	0.0135735	0.0290068	0	1		large subunit ribosomal RNA
AARA21_009466	254.172	1.48835	2.80568	0.260108	2.01334e-09	2.95054e-08	1	1	up	growth hormone secretagogue receptor type 1-like
AARA21_011896	1604.16	1.4875	2.80403	0.324743	9.78286e-07	6.54923e-06	1	1	up	calcium and integrin-binding protein 1-like
AARA21_006949	71.2351	1.48566	2.80045	0.743234	0.00685792	0.0160467	0	1		golgin subfamily A member 3-like
AARA21_012225	9236.65	1.48509	2.79935	0.410046	5.97036e-05	0.000248369	1	1	up	NPC intracellular cholesterol transporter 2 homolog a, transcript variant X1
AARA21_005395	24803.8	1.48504	2.79926	0.3168	5.90211e-07	4.17037e-06	1	1	up	trithorax group protein osa, transcript variant X6
AARA21_004342	14646.9	1.48474	2.79866	0.209792	3.39798e-13	1.60153e-11	1	1	up	sodium-dependent neutral amino acid transporter B(0)AT3, transcript variant X4
AARA21_015449	17.0966	1.4835	2.79625	0.66539	0.00396633	0.00992508	1	1	up	transcription initiation factor IIB-like, transcript variant X1
AARA21_000116	74.1138	2.14571	4.42509	0.338004	1.69253e-11	4.78633e-10	1	1	up	calcium and integrin-binding family member 2
AARA21_005924	2684.21	1.48164	2.79266	0.277999	1.83472e-08	1.99386e-07	1	1	up	acid sphingomyelinase-like phosphodiesterase 3a, transcript variant X1
AARA21_013369	21963	1.48084	2.79111	0.267656	7.10974e-09	8.7291e-08	1	1	up	cyclin-T
AARA21_000832	15.9818	1.47979	2.78909	0.765023	0.00679191	0.0159183	0	1		myrosinase-binding protein 2-like
AARA21_011868	43214.8	1.4797	2.78891	0.26988	6.90879e-09	8.54764e-08	1	1	up	la-related protein Larp4B, transcript variant X1
AARA21_015649	53450.2	1.47968	2.78887	0.271236	1.0028e-08	1.18268e-07	1	1	up	failed axon connections, transcript variant X1
AARA21_006847	1813.27	1.47908	2.78771	0.591436	0.00210165	0.00569064	1	1	up	maltase 2-like
AARA21_008129	86566.6	1.47897	2.7875	0.261876	3.70379e-09	5.0007e-08	1	1	up	protein split ends-like, transcript variant X1
AARA21_010655	98.5782	1.47893	2.78741	0.698754	0.00508033	0.0123617	0	1		gustatory and odorant receptor 22-like
AARA21_007638	169.341	1.47839	2.78637	0.444222	0.00017189	0.000627435	1	1	up	extensin-like
AARA21_006550	8040.39	1.47757	2.78478	0.281016	3.22791e-08	3.27036e-07	1	1	up	Usher syndrome type-1G protein homolog, transcript variant X6
AARA21_006987	1053.89	1.47443	2.77874	0.307601	3.6573e-07	2.74714e-06	1	1	up	cytosolic carboxypeptidase 2-like, transcript variant X3
AARA21_005631	9682.9	1.47309	2.77616	0.283715	4.68373e-08	4.54148e-07	1	1	up	protein sex-lethal-like, transcript variant X2
AARA21_011272	68585.4	2.12165	4.3519	0.210802	1.08108e-24	6.32286e-22	1	1	up	uncharacterized LOC120908497, transcript variant X2
AARA21_007205	11976.2	1.4703	2.7708	0.233201	5.5242e-11	1.29472e-09	1	1	up	voltage-gated potassium channel subunit beta-2, transcript variant X3
AARA21_009024	35294.3	1.47007	2.77036	0.23609	1.10384e-10	2.37907e-09	1	1	up	signal transducer and transcription activator, transcript variant X4
AARA21_005293	111.964	2.11729	4.33877	0.360261	4.4298e-10	7.78665e-09	1	1	up	zwei Ig domain protein zig-8-like
AARA21_009104	6358.4	1.46794	2.76627	0.183125	2.54013e-16	2.70115e-14	1	1	up	fibroblast growth factor receptor homolog 1-like, transcript variant X1
AARA21_004101	35682.3	1.4665	2.76351	0.21775	3.86291e-12	1.30457e-10	1	1	up	clustered mitochondria protein homolog
AARA21_010548	78.6641	1.46601	2.76256	1.03946	0.0168931	0.0351469	0	1		caspase-3-like
AARA21_013453	26226.6	1.46515	2.76092	0.232079	5.15956e-11	1.23169e-09	1	1	up	ELAV-like protein 3, transcript variant X1
AARA21_006270	385.963	1.46407	2.75886	0.366995	1.38765e-05	6.88315e-05	1	1	up	cilia- and flagella-associated protein 58
AARA21_002290	83.8165	1.46005	2.75118	0.346657	5.68626e-06	3.09308e-05	1	1	up	intraflagellar transport protein 172 homolog
AARA21_014460	6.18899	1.45828	2.7478	1.31763	0.0210572	0.0423614	0	1		pro-resilin-like
AARA21_004408	3190.06	1.45827	2.74779	0.3018	3.1331e-07	2.40822e-06	1	1	up	toll-like receptor 6
AARA21_002344	4.76607	1.45781	2.7469	2.58953	0.0151158	0.0318531	0	1		large subunit ribosomal RNA
AARA21_010960	14.3682	1.45769	2.74669	0.755614	0.00681833	0.0159744	0	1		potassium/sodium hyperpolarization-activated cyclic nucleotide-gated channel 2-like, transcript variant X2
AARA21_010241	69.9918	1.45667	2.74474	0.350072	5.39295e-06	2.95407e-05	1	1	up	dynein light chain 1, axonemal
AARA21_010583	23822.2	1.45643	2.74429	0.224072	1.89808e-11	5.24089e-10	1	1	up	protein lap4, transcript variant X3
AARA21_007902	56118.3	1.45504	2.74165	0.199772	7.77679e-14	4.50739e-12	1	1	up	glycogen synthase kinase-3 beta-like, transcript variant X1
AARA21_005242	1561.72	1.45253	2.73687	0.353809	8.7309e-06	4.54636e-05	1	1	up	homeotic protein ocelliless, transcript variant X1
AARA21_012625	5519.17	1.45223	2.7363	0.324299	1.66529e-06	1.05294e-05	1	1	up	protein vein-like, transcript variant X11
AARA21_012996	42.5736	1.45157	2.73506	0.607444	0.00264394	0.00693993	1	1	up	zinc finger protein 180-like
AARA21_000515	13361.4	1.44568	2.72392	0.326473	2.13672e-06	1.31233e-05	1	1	up	ELAV-like protein 2, transcript variant X5
AARA21_013895	54.7937	2.11622	4.33556	0.521832	5.44112e-06	2.97665e-05	1	1	up	adenosine receptor A2b-like
AARA21_000073	42.1458	2.11148	4.32136	0.730784	0.000375346	0.00125216	1	1	up	uncharacterized LOC120894431
AARA21_010197	4.70452	1.44432	2.72135	1.19949	0.0202861	0.040996	0	1		large subunit ribosomal RNA
AARA21_003455	22660.7	1.44276	2.7184	0.159044	2.85222e-20	7.48969e-18	1	1	up	CD63 antigen, transcript variant X2
AARA21_000195	20505.1	1.44255	2.71802	0.192067	1.42287e-14	9.89622e-13	1	1	up	NF-kappa-B essential modulator, transcript variant X1
AARA21_014587	7052.28	1.44189	2.71676	0.394193	5.44805e-05	0.000229235	1	1	up	apoptosis-inducing factor 3-like
AARA21_000268	15.9277	1.44052	2.71419	0.781655	0.011344	0.0247689	0	1		katanin p60 ATPase-containing subunit A-like 2
AARA21_007602	116.139	1.4393	2.71189	0.76853	0.00963703	0.0214607	0	1		probable 4-coumarate--CoA ligase 3
AARA21_005338	563.45	1.43783	2.70914	0.230116	8.81881e-11	1.95641e-09	1	1	up	probable insulin-like peptide 7
AARA21_003089	2807.12	1.43708	2.70773	0.285564	1.11997e-07	9.6976e-07	1	1	up	fatty acyl-CoA reductase wat-like
AARA21_013197	129919	1.43675	2.7071	0.256873	4.26758e-09	5.6319e-08	1	1	up	cyclin G, transcript variant X3
AARA21_000798	4489.75	1.43621	2.7061	0.757388	0.00873205	0.0196976	0	1		protein I'm not dead yet-like
AARA21_009859	7.07292	1.43559	2.70492	1.36872	0.0212871	0.0427103	0	1		tRNA-Tyr
AARA21_005781	5387.33	1.43513	2.70406	0.241002	5.59714e-10	9.55151e-09	1	1	up	CUE domain-containing protein 1, transcript variant X1
AARA21_007137	4523.34	2.10595	4.30482	0.254541	1.75245e-17	2.62195e-15	1	1	up	uncharacterized LOC120897407
AARA21_007133	5894.67	1.43477	2.70338	0.308541	7.65563e-07	5.2564e-06	1	1	up	protein rolling stone-like, transcript variant X7
AARA21_005094	9.30729	1.43412	2.70217	1.03287	0.0189277	0.0386392	0	1		large subunit ribosomal RNA
AARA21_013322	4322.12	1.43257	2.69927	0.276968	5.3834e-08	5.13859e-07	1	1	up	BAI1-associated protein 3, transcript variant X4
AARA21_013690	40685.9	1.43212	2.69842	0.272998	3.69627e-08	3.67542e-07	1	1	up	amyloid-beta-like protein, transcript variant X1
AARA21_001787	147.52	1.43199	2.69819	0.369685	2.17422e-05	0.000101804	1	1	up	low molecular weight phosphotyrosine protein phosphatase 1-like
AARA21_011021	3094.99	1.43064	2.69567	0.264123	1.41347e-08	1.58148e-07	1	1	up	serine-rich adhesin for platelets-like, transcript variant X3
AARA21_004132	928.101	1.42801	2.69076	0.232739	2.11048e-10	4.15222e-09	1	1	up	transmembrane protein 205
AARA21_001518	10237.9	1.42665	2.68822	0.528808	0.00135389	0.00388677	1	1	up	rhythmically expressed gene 5 protein
AARA21_012179	25956.7	1.4251	2.68534	0.170625	1.65451e-17	2.51066e-15	1	1	up	ATP-binding cassette sub-family G member 4, transcript variant X2
AARA21_012327	1535.81	2.10586	4.30454	0.265826	2.97099e-16	3.07817e-14	1	1	up	protein vestigial, transcript variant X3
AARA21_006139	67.4182	1.42331	2.682	0.504314	0.000843769	0.00256362	1	1	up	phosphatidylethanolamine-binding protein homolog F40A3.3-like
AARA21_001646	16000.2	1.42281	2.68107	0.200117	2.84815e-13	1.37255e-11	1	1	up	unconventional myosin ID, transcript variant X2
AARA21_002770	1005.02	1.42054	2.67685	0.481084	0.000634505	0.00198884	1	1	up	serine protease svh-1-like
AARA21_009286	5700.48	2.09515	4.27271	0.323005	1.1204e-11	3.32171e-10	1	1	up	homogentisate 1,2-dioxygenase
AARA21_007832	4350.38	1.41961	2.67514	0.367437	2.49247e-05	0.000114488	1	1	up	elongation of very long chain fatty acids protein 7-like
AARA21_007038	1399.98	1.41766	2.67152	0.467518	0.000507436	0.00163557	1	1	up	putative transcription factor SOX-15
AARA21_004118	12477.3	1.41706	2.67041	0.292152	2.93963e-07	2.28407e-06	1	1	up	cell division cycle 7-related protein kinase, transcript variant X2
AARA21_002926	37.6385	1.41668	2.6697	0.600597	0.00361344	0.0091434	1	1	up	glucose dehydrogenase [FAD, quinone], transcript variant X1
AARA21_013584	2218.82	1.41556	2.66763	0.286862	1.89086e-07	1.54376e-06	1	1	up	probable peptidyl-tRNA hydrolase 2
AARA21_013563	3068.21	1.41413	2.66499	0.294666	3.76729e-07	2.81333e-06	1	1	up	GTP-binding protein Di-Ras2
AARA21_006744	245.235	1.41316	2.6632	0.857608	0.0137097	0.0292688	0	1		brachyurin-like
AARA21_006915	22874.2	2.09014	4.25789	0.42443	1.03992e-07	9.10971e-07	1	1	up	neprilysin-1, transcript variant X1
AARA21_000396	17015	1.40913	2.65577	0.576203	0.00271282	0.00710077	1	1	up	glycine-rich cell wall structural protein 1.0-like
AARA21_005424	23347.9	2.08497	4.24267	0.198594	1.20533e-26	1.10778e-23	1	1	up	NADH dehydrogenase [ubiquinone] 1 beta subcomplex subunit 2, mitochondrial-like
AARA21_003266	8165.03	1.40691	2.65168	0.252035	5.74816e-09	7.30124e-08	1	1	up	calcium/calmodulin-dependent protein kinase kinase 1, transcript variant X5
AARA21_008921	19897.2	1.40517	2.64849	0.258144	1.28014e-08	1.44996e-07	1	1	up	elongation of very long chain fatty acids protein AAEL008004, transcript variant X1
AARA21_008196	2417.62	1.40342	2.64527	0.539753	0.00183296	0.00505675	1	1	up	epoxide hydrolase 3-like
AARA21_007251	22344.1	1.40336	2.64517	0.273415	6.95084e-08	6.43891e-07	1	1	up	phosphatidylinositol 4-kinase beta, transcript variant X1
AARA21_013655	37.069	1.40288	2.64429	0.509263	0.000949963	0.0028479	1	1	up	coiled-coil and C2 domain-containing protein 2A
AARA21_012359	110.485	1.40152	2.6418	0.404688	0.000104827	0.000407619	1	1	up	Bardet-Biedl syndrome 4 protein homolog, transcript variant X1
AARA21_002794	9226.47	1.40133	2.64145	0.174109	2.99038e-16	3.07817e-14	1	1	up	probable methyltransferase-like protein 15 homolog
AARA21_008768	26122.3	1.40035	2.63966	0.26006	1.792e-08	1.95736e-07	1	1	up	E3 ubiquitin-protein ligase znrf2, transcript variant X7
AARA21_014214	217.356	1.39993	2.63888	0.292414	3.69286e-07	2.76739e-06	1	1	up	vertebrate ancient opsin-like
AARA21_015335	3243.68	2.05978	4.16922	0.322933	2.37562e-11	6.27661e-10	1	1	up	antigen 5 like allergen Cul n 1-like
AARA21_005532	3108.2	1.39676	2.6331	0.994088	0.0190153	0.0387872	0	1		uricase, transcript variant X2
AARA21_009151	367.285	1.39597	2.63166	0.260109	3.44667e-08	3.45931e-07	1	1	up	esterase B1-like
AARA21_010263	83609.1	2.05925	4.16769	0.187641	7.24402e-29	1.03565e-25	1	1	up	ATP synthase subunit g, mitochondrial, transcript variant X1
AARA21_009494	2543.54	2.05906	4.16715	0.279368	2.14736e-14	1.46191e-12	1	1	up	protein obstructor-E
AARA21_002641	3669.45	1.3926	2.62551	0.278304	1.36822e-07	1.15215e-06	1	1	up	hemicentin-1-like, transcript variant X1
AARA21_004474	25473.3	1.39005	2.62087	0.337512	9.03279e-06	4.6846e-05	1	1	up	serine protease inhibitor 42Dd-like, transcript variant X6
AARA21_015667	6794.72	1.38853	2.61811	0.392315	9.06215e-05	0.000357897	1	1	up	acyl-CoA Delta(11) desaturase
AARA21_015038	35461.6	1.38769	2.61659	0.293197	5.47519e-07	3.90701e-06	1	1	up	pneumococcal serine-rich repeat protein, transcript variant X4
AARA21_006484	5803.31	1.38697	2.61529	0.333316	7.3409e-06	3.89667e-05	1	1	up	protein PBDC1
AARA21_001345	43049.1	1.38651	2.61445	0.447587	0.000433118	0.0014213	1	1	up	maltase A3-like
AARA21_000115	6261.4	1.38634	2.61414	0.253568	1.13721e-08	1.30881e-07	1	1	up	GTPase-activating protein, transcript variant X1
AARA21_002369	2558.23	1.38619	2.61388	0.298188	8.0901e-07	5.51061e-06	1	1	up	insulin-like growth factor-binding protein complex acid labile subunit
AARA21_006816	125.582	2.04777	4.13467	0.505738	6.20295e-06	3.34227e-05	1	1	up	uncharacterized LOC120902890
AARA21_012867	15874.9	1.38571	2.613	0.227583	2.88523e-10	5.36477e-09	1	1	up	mucin-5AC-like, transcript variant X1
AARA21_013909	13317.3	2.03674	4.10316	0.38756	1.89558e-08	2.04962e-07	1	1	up	ester hydrolase C11orf54 homolog
AARA21_013803	38.1769	2.03019	4.08457	0.931332	0.00237108	0.00632306	1	1	up	general odorant-binding protein 68
AARA21_004788	5241.45	1.38209	2.60645	0.253347	1.1414e-08	1.31208e-07	1	1	up	ecdysone-induced protein 74EF-like
AARA21_003436	14972.1	1.38171	2.60578	0.393563	0.000104402	0.000406332	1	1	up	transcriptional regulator ATRX homolog, transcript variant X1
AARA21_006341	3783.12	1.38163	2.60563	0.295276	6.88157e-07	4.77332e-06	1	1	up	hemicentin-1, transcript variant X2
AARA21_008599	18.9584	1.38105	2.60457	0.557979	0.00236671	0.00631271	1	1	up	protein giant
AARA21_007463	32.5653	1.38059	2.60375	0.589948	0.00335541	0.0085544	1	1	up	ETV5-related protein Ets96B-like
AARA21_006911	247.584	2.02684	4.07512	0.308065	6.13853e-12	1.95991e-10	1	1	up	LOC120896972
AARA21_012782	1362.41	1.37836	2.59972	0.391744	9.77507e-05	0.000382879	1	1	up	myb-like protein Q
AARA21_014207	3.07114	1.37665	2.59665	1.33492	0.0229591	0.0456028	0	1		large subunit ribosomal RNA
AARA21_012654	44841.6	1.37513	2.59392	0.199336	1.37641e-12	5.36673e-11	1	1	up	protein FAM13A, transcript variant X3
AARA21_010601	2454.85	1.37512	2.59389	0.265537	5.5379e-08	5.26645e-07	1	1	up	5-hydroxytryptamine receptor-like, transcript variant X2
AARA21_005423	12.1105	1.37507	2.59381	1.37713	0.0251584	0.0493315	0	1		U2 spliceosomal RNA
AARA21_014408	14.4933	2.02575	4.07204	0.884287	0.00221049	0.00594732	1	1	up	pickpocket protein 28-like
AARA21_013475	5726.73	1.37378	2.59148	0.21064	1.74076e-11	4.8692e-10	1	1	up	UPF0692 protein CG33108
AARA21_012483	12035.2	2.01826	4.05094	0.239438	4.9783e-18	8.65619e-16	1	1	up	GTP-binding protein RAD, transcript variant X1
AARA21_014597	39.8939	1.37365	2.59125	0.591947	0.00379565	0.00954616	1	1	up	large subunit ribosomal RNA
AARA21_001869	13.6134	1.37136	2.58714	1.2075	0.0231704	0.0459656	0	1		cytochrome b5-like
AARA21_014198	16110.4	1.37085	2.58624	0.253207	1.56463e-08	1.73702e-07	1	1	up	1-acylglycerol-3-phosphate O-acyltransferase Pnpla3-like, transcript variant X1
AARA21_010291	64786.9	1.36987	2.58448	0.267536	7.79533e-08	7.12375e-07	1	1	up	zinc finger protein 420, transcript variant X1
AARA21_009332	1996.47	2.01258	4.03503	0.24344	1.86709e-17	2.76136e-15	1	1	up	uncharacterized LOC120904268
AARA21_006884	835.582	1.36912	2.58312	0.492688	0.00112616	0.0033083	1	1	up	protein scarlet
AARA21_009807	3180.25	1.36425	2.57443	0.25035	1.28766e-08	1.45592e-07	1	1	up	protein king tubby, transcript variant X1
AARA21_015583	9157.9	2.00615	4.0171	0.290715	7.19281e-13	3.03442e-11	1	1	up	homeobox protein homothorax, transcript variant X5
AARA21_004028	5588.01	1.36333	2.57278	0.297047	1.12079e-06	7.39927e-06	1	1	up	putative polypeptide N-acetylgalactosaminyltransferase 9, transcript variant X7
AARA21_009622	35439.7	2.00467	4.01297	0.189123	4.40945e-27	4.36434e-24	1	1	up	protein stunted-like, transcript variant X1
AARA21_003044	197.154	1.36198	2.57037	0.348252	2.15214e-05	0.000100954	1	1	up	phospholipase B1, membrane-associated-like, transcript variant X3
AARA21_003798	15031.4	1.36127	2.5691	0.311113	3.03906e-06	1.79046e-05	1	1	up	lysophosphatidylcholine acyltransferase-like, transcript variant X2
AARA21_004768	8352.07	1.36046	2.56767	0.383908	9.6701e-05	0.000379731	1	1	up	signal element on autosome protein 2-like
AARA21_015209	9432.53	1.35927	2.56556	0.224087	3.42074e-10	6.21677e-09	1	1	up	ecdysone-induced protein 75B, isoforms C/D, transcript variant X5
AARA21_010636	6505.37	1.99978	3.99938	0.277949	8.74325e-14	4.96756e-12	1	1	up	1-acyl-sn-glycerol-3-phosphate acyltransferase alpha-like
AARA21_009932	8973.21	1.99913	3.9976	0.369732	8.49312e-09	1.02708e-07	1	1	up	one cut domain family member 3, transcript variant X2
AARA21_013211	49604	1.35348	2.55529	0.249487	1.26078e-08	1.43181e-07	1	1	up	protein Gawky-like, transcript variant X2
AARA21_006634	38642.9	1.35209	2.55281	0.163705	3.97414e-17	5.27167e-15	1	1	up	protein windpipe, transcript variant X4
AARA21_001945	29.2815	1.35131	2.55143	0.420134	0.000254585	0.000887976	1	1	up	U4 spliceosomal RNA
AARA21_006906	109273	1.35115	2.55116	0.337765	1.56571e-05	7.64785e-05	1	1	up	gelsolin-like, transcript variant X1
AARA21_009523	6539.71	1.35086	2.55065	0.286849	6.3691e-07	4.45629e-06	1	1	up	high-affinity choline transporter 1, transcript variant X3
AARA21_015373	185.062	1.99611	3.98923	0.95075	0.00282841	0.00736406	1	1	up	uncharacterized LOC120895807
AARA21_000818	621.898	1.34865	2.54674	0.366191	5.41302e-05	0.000227985	1	1	up	homeobox protein unc-4-like, transcript variant X2
AARA21_013625	2109.4	1.34653	2.543	0.263902	8.5807e-08	7.71005e-07	1	1	up	leucine-rich repeat neuronal protein 2-like
AARA21_014343	7.81726	1.3448	2.53994	0.985815	0.0209819	0.0422164	0	1		large subunit ribosomal RNA
AARA21_000722	13148.8	1.34278	2.5364	0.242111	7.75998e-09	9.45527e-08	1	1	up	tyrosine-protein kinase Src42A, transcript variant X6
AARA21_009880	10574.4	1.34151	2.53417	0.383361	0.000113517	0.000437573	1	1	up	17-beta-hydroxysteroid dehydrogenase 14-like
AARA21_009271	104.638	1.99145	3.97637	0.648825	0.000263117	0.000913527	1	1	up	DE-cadherin-like
AARA21_004119	7776.01	1.33916	2.53004	0.266038	1.23699e-07	1.0578e-06	1	1	up	vesicular glutamate transporter 1, transcript variant X1
AARA21_008288	584.489	1.3366	2.52556	0.40585	0.0002229	0.000788793	1	1	up	ionotropic receptor 25a
AARA21_014117	1016.53	1.98866	3.96867	0.544393	3.01766e-05	0.000136096	1	1	up	pancreatic triacylglycerol lipase-like, transcript variant X3
AARA21_005468	4278.67	1.33346	2.52006	0.580813	0.00437439	0.0108366	0	1		L-lactate dehydrogenase
AARA21_003356	47.8835	1.3321	2.51769	0.513219	0.00185952	0.00511797	1	1	up	UDP-glucosyltransferase 2-like
AARA21_003936	126.774	1.33081	2.51544	0.729749	0.0123295	0.0266405	0	1		trypsin-like
AARA21_001113	174263	1.33042	2.51476	0.221535	5.17855e-10	8.93408e-09	1	1	up	soma ferritin
AARA21_015078	1028.59	1.3304	2.51472	0.250187	2.7396e-08	2.82909e-07	1	1	up	fukutin-related protein
AARA21_006841	3549.15	1.32998	2.51399	0.302712	2.85012e-06	1.6892e-05	1	1	up	protein rolling stone-like, transcript variant X1
AARA21_007724	3130.04	1.32979	2.51366	0.297703	2.1461e-06	1.31558e-05	1	1	up	retinal homeobox protein Rx, transcript variant X1
AARA21_000591	12135.6	1.32844	2.51131	0.229007	1.78736e-09	2.64648e-08	1	1	up	AP-1 complex subunit gamma-1, transcript variant X2
AARA21_013173	86.3964	1.98282	3.95266	0.648879	0.000239923	0.000841157	1	1	up	juvenile hormone epoxide hydrolase 1-like
AARA21_007667	56.0797	1.97253	3.92456	0.624356	0.000159922	0.000590111	1	1	up	knob-associated histidine-rich protein-like, transcript variant X2
AARA21_008118	145.195	1.96943	3.91613	0.496263	8.00894e-06	4.20616e-05	1	1	up	uncharacterized LOC120896106, transcript variant X2
AARA21_001310	5808.27	1.32602	2.50711	0.30179	2.90417e-06	1.71682e-05	1	1	up	collagen alpha-1(XVIII) chain, transcript variant X2
AARA21_013113	14203.2	1.32574	2.50662	0.222767	7.21388e-10	1.19729e-08	1	1	up	multidrug resistance-associated protein 4-like, transcript variant X2
AARA21_006644	48.6414	1.32346	2.50265	0.925185	0.0222906	0.0444052	0	1		dynein regulatory complex protein 1 homolog
AARA21_000862	95.6004	1.32286	2.50162	0.494281	0.00168302	0.00470258	1	1	up	tectonic
AARA21_003880	4027.52	1.32169	2.49959	0.190616	1.12852e-12	4.46791e-11	1	1	up	MOXD1 homolog 2-like
AARA21_005788	35678	1.32104	2.49845	0.225538	1.29954e-09	2.00975e-08	1	1	up	heterogeneous nuclear ribonucleoprotein L, transcript variant X1
AARA21_014611	152.143	1.3201	2.49684	0.357952	5.46878e-05	0.000229957	1	1	up	T-box protein H15-like, transcript variant X2
AARA21_012940	22950.5	1.31978	2.49629	0.196677	5.4076e-12	1.75706e-10	1	1	up	cytoplasmic dynein 1 light intermediate chain 2, transcript variant X1
AARA21_007960	2319.73	1.96476	3.90347	0.2623	9.75231e-15	7.29552e-13	1	1	up	alpha-tocopherol transfer protein-like
AARA21_003845	13253.1	1.3182	2.49355	0.201389	1.64565e-11	4.67431e-10	1	1	up	cytochrome b reductase 1, transcript variant X4
AARA21_006372	224.789	1.31818	2.49352	1.07845	0.0254527	0.0497923	0	1		endochitinase-like
AARA21_001381	138.108	1.9632	3.89926	0.745123	0.000808661	0.00246506	1	1	up	ryncolin-2-like, transcript variant X1
AARA21_009767	6704.76	1.31705	2.49156	0.332084	1.93522e-05	9.21806e-05	1	1	up	carbonic anhydrase 7
AARA21_013306	157.056	1.31665	2.49087	0.325366	1.34781e-05	6.71923e-05	1	1	up	transmembrane channel-like protein 3, transcript variant X3
AARA21_015088	36405.1	1.31609	2.48991	0.185122	3.28193e-13	1.55825e-11	1	1	up	protein argonaute-2, transcript variant X2
AARA21_015696	4636.98	1.31505	2.48811	0.825433	0.017615	0.0363749	0	1		holotricin-3-like
AARA21_002906	21512.3	1.3148	2.48768	0.307642	5.13249e-06	2.82583e-05	1	1	up	eukaryotic translation initiation factor 5B
AARA21_006878	26.5363	1.31325	2.48501	0.875591	0.0204708	0.0413109	0	1		pickpocket protein 28-like
AARA21_011851	3007.79	1.31202	2.48289	0.355995	5.76049e-05	0.000240403	1	1	up	cytidine deaminase-like
AARA21_000652	193.072	1.96275	3.89804	0.286284	7.73739e-13	3.2535e-11	1	1	up	serine/threonine-protein kinase dyf-5, transcript variant X2
AARA21_015194	18670.7	1.30966	2.47883	0.27528	5.35152e-07	3.82545e-06	1	1	up	autophagy-related protein 101
AARA21_002123	9236.48	1.30935	2.47829	0.27585	7.72642e-07	5.29653e-06	1	1	up	IDLSRF-like peptide, transcript variant X1
AARA21_003693	10515.9	1.30502	2.47088	0.272434	5.08588e-07	3.67228e-06	1	1	up	tyrosine-protein phosphatase Lar, transcript variant X6
AARA21_004255	54573.8	1.30473	2.47038	0.242485	2.07747e-08	2.20915e-07	1	1	up	plasma membrane calcium-transporting ATPase 1, transcript variant X28
AARA21_007995	23309.5	1.30463	2.4702	0.289661	1.80879e-06	1.13144e-05	1	1	up	serine/threonine-protein kinase minibrain, transcript variant X4
AARA21_012997	632.914	1.30249	2.46654	0.199393	1.73767e-11	4.8692e-10	1	1	up	probable G-protein coupled receptor Mth-like 3
AARA21_012746	4346.82	1.30076	2.46358	0.243819	2.39764e-08	2.4953e-07	1	1	up	FMRFamide-related peptides, transcript variant X2
AARA21_014702	36.3332	1.29988	2.46208	0.854683	0.0195031	0.0396189	0	1		retinaldehyde-binding protein 1-like
AARA21_008685	18176	1.29935	2.46118	0.272857	5.27997e-07	3.7827e-06	1	1	up	phosphatase Herzog, transcript variant X1
AARA21_012373	571.131	1.29871	2.46009	0.229292	4.01315e-09	5.34546e-08	1	1	up	zwei Ig domain protein zig-8-like, transcript variant X3
AARA21_008261	20.304	1.29709	2.45733	0.756915	0.0147329	0.0311483	0	1		serine/threonine-protein kinase Nek8
AARA21_004483	7992.11	1.29402	2.45211	0.217221	7.23331e-10	1.19783e-08	1	1	up	protein FAM32A
AARA21_007707	6083.59	1.29203	2.44872	0.176614	7.31719e-14	4.27956e-12	1	1	up	CYFIP-related Rac1 interactor B, transcript variant X1
AARA21_003807	8043	1.29115	2.44723	0.238014	1.42947e-08	1.59661e-07	1	1	up	Krueppel homolog 1-like, transcript variant X2
AARA21_013911	21.1717	1.29101	2.447	0.747356	0.0145477	0.0307973	0	1		5.8S ribosomal RNA
AARA21_013003	2869.66	1.28901	2.44361	0.240726	2.29356e-08	2.39929e-07	1	1	up	homeobox protein araucan
AARA21_000719	940.437	1.28875	2.44316	0.32754	2.21134e-05	0.000103467	1	1	up	inhibin beta chain
AARA21_002627	16687.6	1.28795	2.4418	0.240869	2.53166e-08	2.62488e-07	1	1	up	oxysterol-binding protein-related protein 8, transcript variant X4
AARA21_008464	17.2652	1.2877	2.44138	0.75273	0.0143289	0.0303941	0	1		protein chibby homolog 1, transcript variant X3
AARA21_011815	683.583	1.95786	3.88486	0.270866	6.47656e-14	3.84027e-12	1	1	up	uncharacterized LOC120906562, transcript variant X1
AARA21_009469	17198	1.28354	2.43436	0.194002	1.07218e-11	3.19347e-10	1	1	up	upstream stimulatory factor 2-like, transcript variant X4
AARA21_015738	179620	1.28346	2.43421	0.230117	4.57669e-09	5.99067e-08	1	1	up	40S ribosomal protein S27
AARA21_002077	73.6669	1.28199	2.43174	1.00883	0.0267841	0.0519257	0	1		probable chitinase 10
AARA21_015277	129.235	1.28197	2.43171	0.520301	0.00312213	0.00802647	1	1	up	oxidative stress-induced growth inhibitor 2-like
AARA21_003009	102075	1.28151	2.43094	0.248141	6.92275e-08	6.4175e-07	1	1	up	ras-like GTP-binding protein Rho1, transcript variant X4
AARA21_015685	30.5461	1.9543	3.87527	0.478192	4.39523e-06	2.47066e-05	1	1	up	uncharacterized LOC120905007
AARA21_007273	159.89	1.28057	2.42935	0.380675	0.000184323	0.000665456	1	1	up	glucose dehydrogenase [FAD, quinone]
AARA21_004359	1995.89	1.94344	3.84621	0.619032	0.000197108	0.000706263	1	1	up	transmembrane protease serine 9-like
AARA21_000865	12.5482	1.27845	2.42578	0.944526	0.0255387	0.049925	0	1		protein PELPK1-like
AARA21_011460	2159.96	1.27767	2.42447	0.173937	5.99977e-14	3.59065e-12	1	1	up	protein BRAWNIN
AARA21_010688	231.786	1.27755	2.42427	0.45019	0.00109582	0.00323023	1	1	up	calcitonin gene-related peptide type 1 receptor
AARA21_014151	1703.03	1.27712	2.42355	0.476467	0.00176346	0.00489864	1	1	up	4-coumarate--CoA ligase 1-like
AARA21_001649	3980.96	1.94066	3.83882	0.219283	1.29132e-19	2.91499e-17	1	1	up	solute carrier organic anion transporter family member 74D, transcript variant X5
AARA21_010848	3220.61	1.2738	2.41798	0.323161	2.10565e-05	9.9098e-05	1	1	up	prominin-1, transcript variant X2
AARA21_000301	435.656	1.27287	2.41642	0.351067	7.476e-05	0.000302306	1	1	up	zinc metalloproteinase-disintegrin-like EoMP06
AARA21_011605	1578.71	1.27225	2.41538	0.305432	8.552e-06	4.46223e-05	1	1	up	delta-sarcoglycan
AARA21_002118	7434.91	1.27212	2.41516	0.321005	1.98981e-05	9.44754e-05	1	1	up	neural cell adhesion molecule 2-like, transcript variant X3
AARA21_002370	17886.3	1.27164	2.41436	0.190439	6.22692e-12	1.98321e-10	1	1	up	ethanolamine-phosphate cytidylyltransferase, transcript variant X1
AARA21_003070	3088.97	1.27027	2.41206	0.224468	4.40379e-09	5.782e-08	1	1	up	glutamate [NMDA] receptor subunit 1
AARA21_008915	19979.6	1.26909	2.41009	0.222263	3.10971e-09	4.27942e-08	1	1	up	serine/threonine-protein phosphatase 6 regulatory subunit 3, transcript variant X2
AARA21_014720	677.606	1.26854	2.40918	0.671907	0.0117098	0.0254552	0	1		venom serine protease-like, transcript variant X2
AARA21_015031	19682.9	1.26808	2.40841	0.209836	4.21868e-10	7.48713e-09	1	1	up	neurocalcin homolog, transcript variant X3
AARA21_006975	34.204	1.93976	3.83642	0.401886	2.07299e-07	1.6723e-06	1	1	up	dynein light chain Tctex-type 5-like, transcript variant X2
AARA21_013294	365.824	1.93723	3.8297	0.781808	0.0013988	0.00400053	1	1	up	skin secretory protein xP2-like
AARA21_007648	2184.81	1.93292	3.81828	0.548896	5.10898e-05	0.000217098	1	1	up	uncharacterized LOC120901443
AARA21_009608	10161	1.26555	2.40419	0.28114	2.13272e-06	1.31049e-05	1	1	up	all trans-polyprenyl-diphosphate synthase PDSS1-like, transcript variant X4
AARA21_006855	922.883	1.2649	2.4031	0.51712	0.0032843	0.00839808	1	1	up	glutamate receptor ionotropic, delta-1
AARA21_013120	2551.51	1.26411	2.40179	0.353478	9.48274e-05	0.000373247	1	1	up	apomucin
AARA21_010916	151.565	1.26279	2.39959	0.61957	0.00863401	0.0195045	0	1		phenoloxidase-activating factor 3-like, transcript variant X1
AARA21_006275	4558.92	1.9209	3.78659	0.485453	9.87625e-06	5.08514e-05	1	1	up	serine protease easter
AARA21_004109	87.0795	1.26262	2.3993	0.375647	0.000193848	0.000695744	1	1	up	intraflagellar transport protein 56
AARA21_014658	30462.1	1.26184	2.39801	0.244239	6.92224e-08	6.4175e-07	1	1	up	proton-coupled amino acid transporter-like protein pathetic, transcript variant X2
AARA21_000480	52898.5	1.92084	3.78644	0.517215	2.57733e-05	0.000117901	1	1	up	glutenin, high molecular weight subunit PW212-like
AARA21_003717	9.42576	1.26124	2.39702	2.86483	0.01191	0.0258424	0	1		involucrin-like
AARA21_004129	16146.9	1.26111	2.3968	0.287063	3.18135e-06	1.86574e-05	1	1	up	gelsolin-like, transcript variant X3
AARA21_012416	3906.89	1.91965	3.7833	0.366085	2.08653e-08	2.21148e-07	1	1	up	loricrin-like
AARA21_010219	806.201	1.91297	3.76585	0.285324	2.88759e-12	1.01515e-10	1	1	up	keratin-associated protein 5-1-like
AARA21_000768	69.7193	1.90609	3.74792	0.346933	5.41126e-09	6.92114e-08	1	1	up	uncharacterized LOC120905822
AARA21_006540	72560.5	1.25772	2.39117	0.209726	6.05942e-10	1.02588e-08	1	1	up	zinc-type alcohol dehydrogenase-like protein C1773.06c, transcript variant X4
AARA21_013964	3849.87	1.25753	2.39087	0.230454	1.41268e-08	1.58148e-07	1	1	up	cytosolic Fe-S cluster assembly factor NUBP1 homolog
AARA21_008820	798.791	1.25626	2.38876	0.292779	4.99009e-06	2.75924e-05	1	1	up	pregnancy-specific beta-1-glycoprotein 11-like
AARA21_008190	1586.2	1.256	2.38832	0.223305	5.70129e-09	7.26321e-08	1	1	up	cysteine-rich DPF motif domain-containing protein 1
AARA21_011191	1001.56	1.25529	2.38716	0.281437	2.29415e-06	1.39503e-05	1	1	up	leucine-rich repeat and fibronectin type-III domain-containing protein 3, transcript variant X3
AARA21_000686	25487.1	1.25481	2.38635	0.321145	2.65582e-05	0.000121179	1	1	up	importin subunit beta, transcript variant X1
AARA21_015036	2497.31	1.25452	2.38588	0.463955	0.0016723	0.00467734	1	1	up	histone H4
AARA21_003800	631.113	1.90578	3.74712	0.607404	0.000197454	0.000707108	1	1	up	sorbitol dehydrogenase-like
AARA21_014783	1699.29	1.25426	2.38545	0.678406	0.013025	0.0279554	0	1		serine protease grass
AARA21_012320	8028.53	1.25303	2.38341	0.138594	5.73149e-20	1.39146e-17	1	1	up	probable cardiolipin synthase (CMP-forming)
AARA21_007447	10.2854	1.25233	2.38226	1.09934	0.0295308	0.0565099	0	1		tRNA-Val
AARA21_015721	3479.83	1.90523	3.74569	0.252537	5.80141e-15	4.66542e-13	1	1	up	sensory neuron membrane protein 2, transcript variant X4
AARA21_014002	428.775	1.25186	2.38149	0.369784	0.000184544	0.000666067	1	1	up	laccase-6-like
AARA21_002957	227.733	1.25124	2.38046	0.523543	0.00403243	0.0100807	0	1		peroxidase, transcript variant X2
AARA21_007272	31831.7	1.24932	2.37729	0.268235	9.43591e-07	6.34335e-06	1	1	up	stress-activated protein kinase JNK, transcript variant X8
AARA21_001126	15392	1.24749	2.37427	0.269093	1.04636e-06	6.95428e-06	1	1	up	mediator of RNA polymerase II transcription subunit 13, transcript variant X3
AARA21_014446	4059.29	1.24624	2.37223	0.313546	1.88405e-05	9.01529e-05	1	1	up	inactive rhomboid protein 1-like, transcript variant X4
AARA21_002127	54.6388	1.24559	2.37115	0.918187	0.0273502	0.052864	0	1		sperm-associated antigen 7-like
AARA21_015660	7398.72	1.24478	2.36983	0.310759	1.68277e-05	8.16139e-05	1	1	up	hemicentin-1-like, transcript variant X1
AARA21_006259	4366.48	1.24389	2.36836	0.28062	2.70269e-06	1.61521e-05	1	1	up	excitatory amino acid transporter 3-like
AARA21_009092	152.118	1.90377	3.74189	0.471275	7.57901e-06	4.01148e-05	1	1	up	uncharacterized LOC120901205
AARA21_010633	5235.04	1.24164	2.36468	0.261011	5.80896e-07	4.11132e-06	1	1	up	sorting nexin-21, transcript variant X2
AARA21_004606	6310.04	1.88308	3.68862	0.622624	0.000289345	0.000995721	1	1	up	4-hydroxyphenylpyruvate dioxygenase
AARA21_005303	1789.82	1.23844	2.35943	0.315767	2.49867e-05	0.0001147	1	1	up	DNA repair protein RAD51 homolog 3-like
AARA21_012014	289.953	1.87945	3.67936	0.796834	0.00189503	0.00520234	1	1	up	DEAD-box ATP-dependent RNA helicase 9-like, transcript variant X2
AARA21_001039	3143.24	1.23765	2.35814	0.617087	0.0102824	0.0227131	0	1		chymotrypsin-2-like, transcript variant X2
AARA21_009919	12536.6	1.23533	2.35435	0.301078	1.17867e-05	5.96617e-05	1	1	up	U-scoloptoxin(19)-Sm1a
AARA21_002174	10159.4	1.23464	2.35323	0.171746	2.01906e-13	1.03503e-11	1	1	up	BAG domain-containing protein Samui
AARA21_006606	147.587	1.87752	3.67442	0.357102	1.97703e-08	2.11634e-07	1	1	up	uncharacterized LOC120896969
AARA21_003736	30.1828	1.23324	2.35094	0.683224	0.0137158	0.0292769	0	1		homeobox protein vnd-like
AARA21_009185	7128.11	1.23204	2.34899	0.24665	1.77007e-07	1.45067e-06	1	1	up	ankyrin-3
AARA21_000809	54316.6	1.2318	2.3486	0.263012	8.53559e-07	5.78953e-06	1	1	up	guanine nucleotide-binding protein G(q) subunit alpha, transcript variant X3
AARA21_009702	17570.6	1.23074	2.34688	0.176222	9.0195e-13	3.73711e-11	1	1	up	MICOS complex subunit MIC27, transcript variant X1
AARA21_010444	69226.9	1.22933	2.34457	0.222502	1.0193e-08	1.19739e-07	1	1	up	serine/threonine-protein phosphatase PP2A
AARA21_010887	82102.9	1.22796	2.34236	0.227706	2.14939e-08	2.27063e-07	1	1	up	profilin, transcript variant X4
AARA21_014961	60.7503	1.22643	2.33987	0.484677	0.00278702	0.00726952	1	1	up	trichohyalin-like, transcript variant X1
AARA21_009640	5898.23	1.22554	2.33842	0.252674	3.74151e-07	2.79733e-06	1	1	up	zinc finger protein on ecdysone puffs, transcript variant X1
AARA21_008647	2217.73	1.22495	2.33747	0.218391	6.95826e-09	8.58335e-08	1	1	up	peptide deformylase, mitochondrial-like
AARA21_014923	5975.1	1.86971	3.6546	0.326436	1.53477e-09	2.32056e-08	1	1	up	putative fatty acyl-CoA reductase CG5065
AARA21_014879	1371.92	1.21882	2.32756	0.464171	0.00222447	0.00597666	1	1	up	fatty acyl-CoA reductase 1, transcript variant X2
AARA21_000207	5717.02	1.21865	2.32729	0.340283	9.91169e-05	0.000387759	1	1	up	neutral ceramidase-like
AARA21_003268	10673.2	1.21844	2.32695	0.189358	4.12259e-11	1.00465e-09	1	1	up	protein SMG5
AARA21_000260	4427.34	1.21826	2.32665	0.238358	9.8164e-08	8.68691e-07	1	1	up	D-glucuronyl C5-epimerase B, transcript variant X2
AARA21_006410	13.0748	1.21784	2.32598	0.851414	0.0242044	0.0477227	0	1		odorant receptor 22b-like
AARA21_005561	56494.5	1.21723	2.325	0.196145	1.72294e-10	3.5245e-09	1	1	up	protein tyrosine phosphatase type IVA 1, transcript variant X3
AARA21_009335	1116.55	1.21675	2.32423	0.33553	8.55615e-05	0.00034021	1	1	up	zinc finger protein rotund, transcript variant X3
AARA21_014912	16487.9	1.21632	2.32352	0.479667	0.00297315	0.00769109	1	1	up	cell growth-regulating nucleolar protein
AARA21_002254	174176	1.21588	2.32283	0.267124	1.15274e-06	7.57526e-06	1	1	up	60S ribosomal protein L37a
AARA21_003528	15133.8	1.21578	2.32267	0.230768	4.26877e-08	4.17373e-07	1	1	up	serine/threonine-protein kinase par-1, transcript variant X1
AARA21_013253	13.3142	1.21577	2.32265	0.699794	0.0153872	0.0323774	0	1		5.8S ribosomal RNA
AARA21_007008	444.114	1.21548	2.32218	0.348567	0.000117612	0.00045241	1	1	up	fork head domain transcription factor slp2-like
AARA21_003868	9517.11	1.21482	2.32112	0.295019	1.15455e-05	5.85789e-05	1	1	up	tyrosine-protein kinase Src64B, transcript variant X2
AARA21_005870	2138.31	1.21288	2.31801	0.294141	1.10246e-05	5.62911e-05	1	1	up	serine/threonine-protein phosphatase rdgC, transcript variant X1
AARA21_012620	3146.85	1.86954	3.65417	0.437737	2.75081e-06	1.64016e-05	1	1	up	uncharacterized LOC120894300
AARA21_014397	21.2625	1.21142	2.31566	1.00291	0.0321674	0.0607155	0	1		serine proteinase stubble, transcript variant X2
AARA21_005836	3843.76	1.86371	3.63942	0.389017	2.39604e-07	1.89373e-06	1	1	up	galactose mutarotase
AARA21_006196	51.7413	1.2111	2.31514	0.782979	0.0224825	0.044746	0	1		odorant receptor 85c-like
AARA21_012554	2.67083	1.21046	2.31411	1.68771	0.0286447	0.0550518	0	1		large subunit ribosomal RNA
AARA21_012795	17049.7	1.20707	2.30868	0.135704	2.02481e-19	4.4158e-17	1	1	up	rho GTPase-activating protein 68F, transcript variant X1
AARA21_009508	54956.2	1.20619	2.30727	0.204495	1.17515e-09	1.83503e-08	1	1	up	histone H3.3A
AARA21_004701	7700.52	1.20537	2.30597	0.284138	6.17561e-06	3.32893e-05	1	1	up	diacylglycerol lipase-beta-like, transcript variant X1
AARA21_014808	250.968	1.20537	2.30597	0.33888	0.000106709	0.000413561	1	1	up	tektin-3-like, transcript variant X1
AARA21_008496	2008.1	1.20476	2.30499	0.274644	3.50608e-06	2.02936e-05	1	1	up	cyclic nucleotide-gated cation channel subunit A, transcript variant X1
AARA21_004699	22806.8	1.2043	2.30426	0.241696	1.98055e-07	1.60578e-06	1	1	up	trithorax group protein osa, transcript variant X7
AARA21_015718	30817.3	1.20332	2.30269	0.300344	1.89188e-05	9.03258e-05	1	1	up	akirin, transcript variant X4
AARA21_009210	425.685	1.85682	3.62209	0.400158	5.1573e-07	3.71551e-06	1	1	up	uncharacterized LOC120906397, transcript variant X4
AARA21_009337	5379.06	1.20075	2.29859	0.298139	1.72078e-05	8.33321e-05	1	1	up	protein big brother, transcript variant X1
AARA21_014260	2932.94	1.20043	2.29809	0.28853	9.68608e-06	4.99522e-05	1	1	up	potassium voltage-gated channel protein Shaw-like, transcript variant X2
AARA21_013229	1069.41	1.20002	2.29743	0.343186	0.000141686	0.000532439	1	1	up	chymotrypsinogen B-like
AARA21_015695	1671.87	1.19979	2.29706	0.23683	1.25743e-07	1.0729e-06	1	1	up	fas apoptotic inhibitory molecule 1, transcript variant X1
AARA21_005056	25.4871	1.85297	3.61242	0.787272	0.00220858	0.00594515	1	1	up	putative nuclease HARBI1
AARA21_004603	1064.14	1.19921	2.29614	0.643945	0.0141005	0.0299788	0	1		proton-associated sugar transporter A-like
AARA21_011688	1786.26	1.19905	2.29589	0.307856	2.97889e-05	0.000134773	1	1	up	centrosome-associated zinc finger protein CP190-like, transcript variant X1
AARA21_006648	6038.4	1.19672	2.29218	0.268652	2.61299e-06	1.56597e-05	1	1	up	tight junction-associated protein 1, transcript variant X4
AARA21_000803	3867.52	1.85078	3.60695	0.555227	0.000110916	0.000428318	1	1	up	uncharacterized LOC120898264
AARA21_005540	14708.9	1.19513	2.28966	0.231996	8.26131e-08	7.49107e-07	1	1	up	protein winged eye-like, transcript variant X9
AARA21_001543	1157.07	1.19341	2.28692	0.238285	1.58365e-07	1.31379e-06	1	1	up	ATP-binding cassette sub-family G member 8, transcript variant X2
AARA21_011682	1861.58	1.19254	2.28554	0.590825	0.0103621	0.0228695	0	1		serine--pyruvate aminotransferase, mitochondrial
AARA21_013993	134.397	1.19248	2.28545	0.544904	0.00708913	0.0164898	0	1		low choriolytic enzyme-like
AARA21_005495	2.89683	1.19218	2.28497	2.11758	0.0186532	0.0381817	0	1		homeotic protein proboscipedia-like
AARA21_000042	13651.8	1.19137	2.2837	0.503896	0.00478499	0.0117318	0	1		heat shock 70 kDa protein cognate 4-like
AARA21_015686	74814.8	1.19135	2.28366	0.329271	9.75478e-05	0.000382317	1	1	up	insulin-like growth factor 2 mRNA-binding protein 1, transcript variant X5
AARA21_014035	1.98489	1.18657	2.2761	1.55109	0.0381831	0.0705183	0	1		large subunit ribosomal RNA
AARA21_004837	3614.45	1.18612	2.2754	0.432104	0.00166465	0.00465835	1	1	up	homeotic protein female sterile
AARA21_011698	15873.5	1.18203	2.26896	0.242034	3.35273e-07	2.5482e-06	1	1	up	FK506-binding protein 2, transcript variant X1
AARA21_010078	1053.55	1.18196	2.26885	0.342638	0.000167539	0.000614208	1	1	up	rho GTPase-activating protein 100F, transcript variant X1
AARA21_015098	756.126	1.18194	2.26881	0.245277	4.43919e-07	3.24909e-06	1	1	up	serine/threonine-protein phosphatase 6 regulatory ankyrin repeat subunit A, transcript variant X1
AARA21_010084	9.70774	1.18167	2.26839	1.07402	0.0357872	0.066658	0	1		glucose dehydrogenase [FAD, quinone]-like
AARA21_000402	4902.69	1.18006	2.26586	0.272826	4.83475e-06	2.68026e-05	1	1	up	band 7 protein AGAP004871, transcript variant X1
AARA21_013185	28.5217	1.17947	2.26494	0.674697	0.0175628	0.0362904	0	1		5.8S ribosomal RNA
AARA21_000614	2027	1.17918	2.26448	0.233264	1.39637e-07	1.17279e-06	1	1	up	mitochondrial thiamine pyrophosphate carrier-like
AARA21_012923	32027.4	1.84917	3.60294	0.182765	7.65157e-25	4.68823e-22	1	1	up	NADH dehydrogenase [ubiquinone] 1 beta subcomplex subunit 1
AARA21_004748	7287.54	1.84772	3.59931	0.219781	6.64103e-18	1.10891e-15	1	1	up	UDP-glycosyltransferase UGT5-like
AARA21_004875	20412.7	1.84249	3.58629	0.738523	0.00142935	0.00407703	1	1	up	endocuticle structural glycoprotein ABD-4-like
AARA21_008619	19830.8	1.17796	2.26257	0.318243	6.72783e-05	0.000275419	1	1	up	neuromodulin
AARA21_015179	14655.6	1.17702	2.26109	0.246932	6.10353e-07	4.29148e-06	1	1	up	NECAP-like protein CG9132
AARA21_007311	930.215	1.17678	2.26072	0.481365	0.00373196	0.00940445	1	1	up	glycine receptor subunit alpha-4-like, transcript variant X2
AARA21_010498	16981.4	1.8354	3.5687	0.47135	1.37754e-05	6.8462e-05	1	1	up	cytochrome P450 4g15-like
AARA21_013831	3318.74	1.17591	2.25936	0.26729	3.45907e-06	2.00486e-05	1	1	up	NAD kinase 2, mitochondrial
AARA21_006018	18487.3	1.17564	2.25893	0.270923	4.58902e-06	2.56391e-05	1	1	up	ceramide synthase 6, transcript variant X2
AARA21_013826	1214.16	1.17533	2.25845	0.265579	2.81429e-06	1.67413e-05	1	1	up	nephrin-like, transcript variant X1
AARA21_009761	194.786	1.17522	2.25828	0.358906	0.000314527	0.00107092	1	1	up	PR domain zinc finger protein 8
AARA21_014888	12122.6	1.17434	2.25689	0.239608	3.11734e-07	2.40185e-06	1	1	up	E3 ubiquitin-protein ligase Nedd-4-like, transcript variant X2
AARA21_007865	858.244	1.17353	2.25562	0.196636	7.38201e-10	1.21775e-08	1	1	up	serine/threonine-protein kinase meng-po
AARA21_011673	10321.2	1.17211	2.2534	0.233919	1.71972e-07	1.418e-06	1	1	up	protein son of sevenless, transcript variant X1
AARA21_011359	29180.8	1.17103	2.25172	0.206676	4.89514e-09	6.35578e-08	1	1	up	division abnormally delayed protein, transcript variant X7
AARA21_002950	3177.46	1.16941	2.2492	0.30597	4.13078e-05	0.000179934	1	1	up	ras-specific guanine nucleotide-releasing factor 2-like, transcript variant X1
AARA21_001342	14453.4	1.16735	2.24598	0.258446	2.05071e-06	1.26554e-05	1	1	up	CUGBP Elav-like family member 4, transcript variant X9
AARA21_012942	8995.52	1.16536	2.2429	0.514934	0.00626147	0.0148154	0	1		fatty acid synthase-like
AARA21_009192	3323.48	1.16521	2.24265	0.185802	1.18299e-10	2.50354e-09	1	1	up	broad-complex core protein isoforms 1/2/3/4/5-like, transcript variant X2
AARA21_009442	625.358	1.83481	3.56723	0.324648	2.42867e-09	3.46946e-08	1	1	up	GATA-binding factor A, transcript variant X3
AARA21_009146	11348.8	1.16366	2.24025	0.301016	3.53084e-05	0.000155907	1	1	up	leucine-rich repeat transmembrane protein FLRT1-like
AARA21_011584	27.4233	1.16206	2.23777	0.531476	0.00704414	0.0164138	0	1		transcription initiation factor TFIID subunit 3-like
AARA21_004780	3826.55	1.83372	3.56456	0.676751	0.000773411	0.00237222	1	1	up	glutathione S-transferase D5-like
AARA21_015221	1587.68	1.16055	2.23542	0.197252	1.39237e-09	2.13281e-08	1	1	up	mpv17-like protein, transcript variant X2
AARA21_002663	5600.7	1.16009	2.23471	0.316074	7.71809e-05	0.000310825	1	1	up	irregular chiasm C-roughest protein-like, transcript variant X3
AARA21_008027	3432.23	1.15841	2.23212	0.287498	1.80767e-05	8.7081e-05	1	1	up	probable inactive tRNA-specific adenosine deaminase-like protein 3, transcript variant X8
AARA21_001836	1313.25	1.15768	2.23099	0.252137	1.48377e-06	9.49588e-06	1	1	up	myosin light chain kinase 2, skeletal/cardiac muscle-like, transcript variant X1
AARA21_015704	20832.4	1.15746	2.23065	0.222677	6.78845e-08	6.32033e-07	1	1	up	IQ motif and SEC7 domain-containing protein 2, transcript variant X2
AARA21_009310	223103	1.83021	3.55588	0.193862	6.27836e-22	2.37599e-19	1	1	up	ATP synthase subunit beta, mitochondrial-like
AARA21_008328	16.202	1.15664	2.22938	0.730286	0.0258358	0.0503756	0	1		tRNA-Lys
AARA21_008760	5763.1	1.15625	2.22878	0.358438	0.000378256	0.00126056	1	1	up	phosphoglycolate phosphatase 2-like
AARA21_011044	65.4503	1.15607	2.22849	0.490189	0.00479272	0.011744	0	1		LIM/homeobox protein Awh-like
AARA21_012124	392.628	1.15412	2.22549	0.338096	0.000195787	0.000702117	1	1	up	fez family zinc finger protein erm, transcript variant X1
AARA21_012172	80.3588	1.15334	2.22429	0.581877	0.011963	0.0259488	0	1		gamma-gliadin-like, transcript variant X1
AARA21_000238	3209.42	1.15313	2.22396	0.277776	1.27688e-05	6.39783e-05	1	1	up	sodium-dependent nutrient amino acid transporter 1-like
AARA21_010985	1920.69	1.15312	2.22395	0.281224	1.33245e-05	6.65292e-05	1	1	up	protein PTHB1, transcript variant X1
AARA21_004515	7.85402	1.15277	2.22341	1.4246	0.0337365	0.0633335	0	1		tRNA-Cys
AARA21_004869	3140.4	1.82945	3.55402	0.365082	2.95336e-07	2.29197e-06	1	1	up	uncharacterized LOC120896149
AARA21_005731	401.579	1.15107	2.22079	0.340382	0.000221601	0.000784852	1	1	up	protein glass-like
AARA21_002120	5677.86	1.15072	2.22025	0.242829	7.20615e-07	4.977e-06	1	1	up	latrophilin Cirl, transcript variant X4
AARA21_013413	19289.5	1.15064	2.22012	0.222619	8.0372e-08	7.30846e-07	1	1	up	actin-binding LIM protein 3, transcript variant X7
AARA21_001142	5201.33	1.15049	2.21989	0.313589	7.72393e-05	0.000310963	1	1	up	ATP-binding cassette sub-family G member 1-like, transcript variant X4
AARA21_005145	1807.5	1.1497	2.21867	0.324755	0.000125114	0.00047784	1	1	up	ubiquitin-conjugating enzyme E2Q-like protein 1, transcript variant X1
AARA21_015727	1638.25	1.14951	2.21839	0.277861	1.15001e-05	5.83713e-05	1	1	up	putative tyrosine-protein kinase Wsck
AARA21_002356	415.881	1.148	2.21607	0.441321	0.00279987	0.00729861	1	1	up	UDP-glucosyltransferase 2-like
AARA21_006150	3722.33	1.14796	2.21601	0.223785	9.78441e-08	8.67053e-07	1	1	up	plasmolipin-like, transcript variant X3
AARA21_013688	23.9909	1.14787	2.21586	0.634591	0.0159364	0.0333964	0	1		selenoprotein V-like
AARA21_008351	28612.2	1.14769	2.21558	0.230435	2.19826e-07	1.76231e-06	1	1	up	nuclear receptor coactivator 2, transcript variant X3
AARA21_008161	10346.8	1.82913	3.55322	0.18468	6.66859e-24	3.43219e-21	1	1	up	uncharacterized LOC120898028
AARA21_010514	2817.2	1.14616	2.21323	0.559178	0.0106138	0.023349	0	1		mucin-2
AARA21_009123	14871.3	1.14526	2.21185	0.245017	1.00315e-06	6.69479e-06	1	1	up	cysteine-rich motor neuron 1 protein, transcript variant X5
AARA21_000189	27575.7	1.14516	2.21171	0.228147	1.77623e-07	1.45479e-06	1	1	up	double-stranded RNA-binding protein Staufen homolog
AARA21_001962	6.14025	1.14478	2.21112	0.823242	0.0343909	0.0644116	0	1		large subunit ribosomal RNA
AARA21_010575	11876.9	1.14283	2.20813	0.237412	4.99236e-07	3.61693e-06	1	1	up	glutamate--cysteine ligase, transcript variant X2
AARA21_007367	1772.11	1.14143	2.206	0.297963	4.17184e-05	0.00018141	1	1	up	acetylcholine receptor subunit alpha-like, transcript variant X7
AARA21_001154	5746.33	1.14034	2.20434	0.199869	4.00793e-09	5.34405e-08	1	1	up	ras-like GTP-binding protein RhoL
AARA21_006059	102.583	1.14027	2.20422	0.575307	0.0119734	0.0259625	0	1		UPF0605 protein CG18335-like
AARA21_002145	9.57957	1.13953	2.2031	0.844274	0.0291419	0.0558738	0	1		odorant receptor 67d-like
AARA21_014856	3350.06	1.13884	2.20204	0.465466	0.00416355	0.0103573	0	1		seminal metalloprotease 1-like
AARA21_003383	16679.5	1.13796	2.2007	0.231011	2.89331e-07	2.24977e-06	1	1	up	lysophospholipid acyltransferase 1, transcript variant X1
AARA21_010429	2254.75	1.13744	2.1999	0.396518	0.00125106	0.00362799	1	1	up	CLIP domain-containing serine protease B15-like, transcript variant X2
AARA21_002709	6142.57	1.13732	2.19973	0.21381	3.46731e-08	3.4746e-07	1	1	up	BMP-binding endothelial regulator protein, transcript variant X4
AARA21_002110	45.2197	1.82875	3.5523	0.429047	2.14162e-06	1.31408e-05	1	1	up	dynein light chain Tctex-type 5-B
AARA21_006893	352.979	1.13649	2.19846	0.29758	4.69005e-05	0.000201022	1	1	up	PPE family protein PPE11-like
AARA21_011224	1818.56	1.82503	3.54315	0.260979	4.45354e-13	2.01774e-11	1	1	up	solute carrier family 46 member 3-like
AARA21_011373	117.831	1.13393	2.19456	0.649362	0.0189373	0.0386525	0	1		venom protease-like
AARA21_014552	74.924	1.82034	3.53164	0.745568	0.00151404	0.00428724	1	1	up	uncharacterized LOC120894425
AARA21_012605	70092.1	1.13329	2.19359	0.221178	1.04921e-07	9.17057e-07	1	1	up	serine/threonine-protein phosphatase 2A 56 kDa regulatory subunit epsilon isoform, transcript variant X9
AARA21_000101	3528.87	1.13049	2.18934	0.230315	3.15079e-07	2.41893e-06	1	1	up	protein Skeletor, isoforms B/C, transcript variant X2
AARA21_014764	8253.32	1.81921	3.52888	0.282137	1.80813e-11	5.02488e-10	1	1	up	serine protease grass-like
AARA21_011799	161.49	1.81757	3.52486	0.461972	1.10438e-05	5.6367e-05	1	1	up	23 kDa integral membrane protein
AARA21_010706	188.252	1.1231	2.17815	0.579387	0.0140392	0.0298741	0	1		carbohydrate sulfotransferase 13-like, transcript variant X2
AARA21_004061	5084.1	1.12202	2.17652	0.240708	1.04277e-06	6.93399e-06	1	1	up	F-box/LRR-repeat protein 6, transcript variant X2
AARA21_006279	4327.97	1.12185	2.17625	0.163583	2.46356e-12	9.03268e-11	1	1	up	MIP18 family protein galla-2
AARA21_012791	521.35	1.12173	2.17608	0.679747	0.0233213	0.0462152	0	1		SET and MYND domain-containing protein 4-like
AARA21_006264	9.20792	1.12119	2.17526	0.98956	0.0411193	0.0751111	0	1		vitelline membrane protein 15a-2-like
AARA21_014943	99.1712	1.81569	3.52028	0.414947	1.88388e-06	1.17271e-05	1	1	up	protein artichoke
AARA21_007460	167.582	1.81508	3.51879	0.719846	0.00128496	0.00371292	1	1	up	uncharacterized protein K02A2.6-like, transcript variant X1
AARA21_005406	39678.7	1.11886	2.17176	0.327697	0.000214789	0.000762817	1	1	up	1-phosphatidylinositol 4,5-bisphosphate phosphodiesterase, transcript variant X4
AARA21_000496	76.8343	1.11819	2.17074	0.603961	0.017849	0.036799	0	1		membrane-associated transporter protein-like
AARA21_011187	3983.43	1.80048	3.48337	0.341188	2.06937e-08	2.20419e-07	1	1	up	uncharacterized LOC120896461
AARA21_009497	5938.29	1.79201	3.46298	0.63285	0.000592879	0.00187158	1	1	up	general odorant-binding protein 19d-like
AARA21_015629	4838.99	1.1152	2.16625	0.402828	0.00178858	0.00495665	1	1	up	sterol O-acyltransferase 1-like, transcript variant X2
AARA21_015547	3539.67	1.11482	2.16567	0.241887	1.41941e-06	9.11354e-06	1	1	up	lipase 3-like
AARA21_013019	414.715	1.788	3.45335	0.598532	0.000370499	0.00123824	1	1	up	uncharacterized LOC120895720, transcript variant X1
AARA21_006321	21259.8	1.11385	2.16422	0.416297	0.00235854	0.00629875	1	1	up	inactive serine protease scarface, transcript variant X1
AARA21_000534	1025.18	1.11214	2.16166	0.704548	0.0270309	0.0523253	0	1		histone H3
AARA21_008292	635.413	1.11199	2.16144	0.286199	3.43905e-05	0.000152377	1	1	up	p53 and DNA damage-regulated protein 1
AARA21_010356	4702.99	1.11186	2.16125	0.219543	1.48004e-07	1.2366e-06	1	1	up	ras-GEF domain-containing family member 1B-like, transcript variant X2
AARA21_004734	3851.69	1.10913	2.15716	0.276359	1.97293e-05	9.38125e-05	1	1	up	regucalcin-like, transcript variant X1
AARA21_004542	3343.17	1.10897	2.15691	0.246342	2.29366e-06	1.39503e-05	1	1	up	putative enoyl-CoA hydratase/isomerase YngF
AARA21_002631	114.246	1.10838	2.15603	0.422797	0.00262143	0.00688507	1	1	up	sodium channel protein Nach
AARA21_000122	50215.7	1.1079	2.15532	0.220612	1.74333e-07	1.43149e-06	1	1	up	vesicle-associated membrane protein-associated protein B-like, transcript variant X2
AARA21_009849	744.211	1.77842	3.43051	0.258786	9.99793e-13	4.05815e-11	1	1	up	protein O-mannosyltransferase 1
AARA21_003851	1595.67	1.10715	2.1542	0.559411	0.0130223	0.0279542	0	1		transmembrane protease serine 9-like
AARA21_008251	3913.41	1.1062	2.15277	0.246734	2.60291e-06	1.56066e-05	1	1	up	RPII140-upstream gene protein
AARA21_006083	4365.11	1.1061	2.15263	0.229565	5.08403e-07	3.67228e-06	1	1	up	kelch-like ECH-associated protein 1B
AARA21_001705	12682.3	1.10602	2.15251	0.156559	6.62901e-13	2.82323e-11	1	1	up	epidermal growth factor receptor, transcript variant X2
AARA21_007004	1230.09	1.77289	3.41737	0.25941	1.42318e-12	5.49912e-11	1	1	up	acrosin-like
AARA21_015733	4111.52	1.10499	2.15097	0.295416	6.13149e-05	0.000254169	1	1	up	protein Abitram
AARA21_014966	1996.38	1.10411	2.14966	0.420538	0.00261548	0.00687223	1	1	up	ATP-binding cassette sub-family G member 4-like
AARA21_007506	163.873	1.10316	2.14825	0.349521	0.000498477	0.00161113	1	1	up	TRAF3-interacting protein 1
AARA21_000670	2.60392	1.10277	2.14767	1.66436	0.0315374	0.0596347	0	1		large subunit ribosomal RNA
AARA21_009570	13345.9	1.10243	2.14716	0.322257	0.000212494	0.000755712	1	1	up	lambda-crystallin homolog
AARA21_002107	3088.82	1.10208	2.14664	0.336143	0.000351446	0.00118502	1	1	up	clavesin-1
AARA21_007163	47530.5	1.10201	2.14654	0.294744	6.4814e-05	0.000266612	1	1	up	unconventional myosin IC, transcript variant X3
AARA21_003296	7499.19	1.10184	2.14628	0.187335	1.77432e-09	2.63628e-08	1	1	up	fasciclin-3, transcript variant X1
AARA21_012176	11959.6	1.10176	2.14617	0.230137	6.08417e-07	4.28021e-06	1	1	up	phospholipid-transporting ATPase ID-like, transcript variant X4
AARA21_007182	3660.11	1.10148	2.14575	0.241461	1.72781e-06	1.08606e-05	1	1	up	connectin-like, transcript variant X2
AARA21_003559	4356.34	1.10124	2.1454	0.212839	8.20487e-08	7.45039e-07	1	1	up	probable prefoldin subunit 4
AARA21_012193	122043	1.10093	2.14494	0.38002	0.00124456	0.0036132	1	1	up	defensin
AARA21_013603	21350.6	1.1007	2.14459	0.246443	2.86806e-06	1.69905e-05	1	1	up	atypical protein kinase C, transcript variant X7
AARA21_014094	49440.4	1.10026	2.14394	0.354612	0.000642649	0.00201093	1	1	up	ejaculatory bulb-specific protein 3-like
AARA21_008084	11580.6	1.09977	2.1432	0.196965	8.6232e-09	1.03988e-07	1	1	up	ras-related protein Rab-39B, transcript variant X4
AARA21_012222	198.106	1.09921	2.14238	0.605489	0.0182888	0.0375613	0	1		dynein assembly factor 1, axonemal homolog
AARA21_010747	21668.9	1.09844	2.14124	0.180021	3.8852e-10	6.99173e-09	1	1	up	rho GTPase-activating protein 17-like, transcript variant X3
AARA21_002189	127420	1.09702	2.13913	0.220326	2.3465e-07	1.86258e-06	1	1	up	60S ribosomal protein L44
AARA21_008364	5192.67	1.76754	3.40473	0.612346	0.000505607	0.00163008	1	1	up	uncharacterized LOC120902248
AARA21_004562	1857.5	1.09608	2.13773	0.302334	9.91026e-05	0.000387759	1	1	up	phosphatidylinositol 3-kinase 2-like, transcript variant X3
AARA21_010213	32995.3	1.09586	2.1374	0.156946	9.56443e-13	3.91928e-11	1	1	up	calsyntenin-1, transcript variant X1
AARA21_013222	5977.55	1.09579	2.13729	0.359234	0.000740716	0.00228228	1	1	up	probable DNA-directed RNA polymerase I subunit RPA43
AARA21_003745	107578	1.76406	3.39653	0.198131	9.61619e-20	2.20949e-17	1	1	up	mitochondrial-processing peptidase subunit beta-like
AARA21_005146	11687.8	1.09527	2.13653	0.179619	3.52094e-10	6.37187e-09	1	1	up	ras-related protein Ral-a, transcript variant X1
AARA21_002474	25454.3	1.09507	2.13623	0.259166	8.60647e-06	4.48701e-05	1	1	up	WD repeat domain phosphoinositide-interacting protein 2-like, transcript variant X3
AARA21_008533	30919.5	1.0925	2.13243	0.26578	1.41969e-05	7.02852e-05	1	1	up	hornerin
AARA21_003619	2129.28	1.09209	2.13183	0.303433	0.000110457	0.000426674	1	1	up	fatty acid hydroxylase domain-containing protein 2, transcript variant X2
AARA21_007634	6001.46	1.09114	2.13042	0.209001	6.0385e-08	5.68379e-07	1	1	up	solute carrier organic anion transporter family member 4C1, transcript variant X1
AARA21_012064	80.5746	1.09096	2.13016	0.456265	0.00473531	0.0116233	0	1		odorant receptor 56a-like
AARA21_005203	1237.47	1.75786	3.38197	0.223739	6.76461e-16	6.3533e-14	1	1	up	uncharacterized LOC120903863
AARA21_003786	1955.05	1.08832	2.12626	0.212141	9.57796e-08	8.50749e-07	1	1	up	probable serine hydrolase
AARA21_009109	12.1888	1.08737	2.12486	1.00318	0.0408787	0.0747564	0	1		tRNA-Gln
AARA21_015020	9768.68	1.08618	2.12311	0.355736	0.000690187	0.00214508	1	1	up	ataxin-1-like, transcript variant X2
AARA21_014776	68.3622	1.08465	2.12086	0.988516	0.0439389	0.0795499	0	1		mucin-5AC-like
AARA21_002266	46.4384	1.08375	2.11954	0.445252	0.00489969	0.0119688	0	1		RYamide receptor-like
AARA21_003216	1798.25	1.08364	2.11938	0.52972	0.0118749	0.025773	0	1		nose resistant to fluoxetine protein 6-like
AARA21_003439	8105.64	1.08359	2.11931	0.404399	0.00244579	0.00649804	1	1	up	CCAAT/enhancer-binding protein
AARA21_014543	1639.96	1.08207	2.11707	0.272192	2.66767e-05	0.000121676	1	1	up	galectin-4-like
AARA21_003576	34276.5	1.08146	2.11617	0.302499	0.000125485	0.000479113	1	1	up	junctophilin-4, transcript variant X3
AARA21_011212	6587.9	1.08115	2.11572	0.26414	1.54884e-05	7.58908e-05	1	1	up	G protein-activated inward rectifier potassium channel 3-like, transcript variant X1
AARA21_002440	6293.73	1.0807	2.11506	0.182875	1.28787e-09	1.99411e-08	1	1	up	myosin light chain kinase, smooth muscle-like, transcript variant X2
AARA21_005403	840.814	1.07928	2.11298	0.390363	0.00187342	0.0051507	1	1	up	death-associated inhibitor of apoptosis 2-like
AARA21_004778	15383.9	1.07898	2.11254	0.260485	1.2626e-05	6.33187e-05	1	1	up	protein retinal degeneration B, transcript variant X1
AARA21_003111	8550.36	1.07867	2.11209	0.247187	4.51875e-06	2.52904e-05	1	1	up	ras-like GTP-binding protein RhoL, transcript variant X3
AARA21_003016	1120.07	1.07645	2.10885	0.535364	0.0130122	0.0279372	0	1		myrosinase 1-like
AARA21_014724	5432.81	1.07606	2.10828	0.267513	2.0999e-05	9.88996e-05	1	1	up	frizzled
AARA21_002867	1688.43	1.07544	2.10736	0.208163	8.51771e-08	7.65879e-07	1	1	up	ADP-ribose glycohydrolase ARH3-like
AARA21_008208	112.755	1.07418	2.10553	0.666158	0.0277899	0.053593	0	1		facilitated trehalose transporter Tret1-like
AARA21_011184	5436.73	1.07361	2.10469	0.172651	2.25644e-10	4.37252e-09	1	1	up	UDP-xylose and UDP-N-acetylglucosamine transporter
AARA21_011197	36.6181	1.07332	2.10427	0.72633	0.0330462	0.0621918	0	1		sperm-associated antigen 1
AARA21_010151	256.649	1.073	2.1038	0.302133	0.000127665	0.000486283	1	1	up	pancreas transcription factor 1 subunit alpha
AARA21_003374	89.7423	1.07234	2.10285	0.487188	0.00847818	0.0192058	0	1		tubulin alpha-3 chain-like
AARA21_005834	124.852	1.07223	2.10268	0.302445	0.000135244	0.00051182	1	1	up	leucine-rich repeat-containing protein 4C-like
AARA21_004790	2487.15	1.07173	2.10195	0.273039	3.12206e-05	0.000140019	1	1	up	divalent-cation tolerance protein CutA
AARA21_008353	7523.95	1.0712	2.10118	0.245649	4.82286e-06	2.67482e-05	1	1	up	tau-tubulin kinase homolog Asator, transcript variant X2
AARA21_005477	29504.4	1.07063	2.10036	0.680788	0.0297871	0.0569241	0	1		glycine-rich cell wall structural protein
AARA21_001774	8436.27	1.07061	2.10032	0.289076	7.69631e-05	0.000310142	1	1	up	facilitated trehalose transporter Tret1-like, transcript variant X2
AARA21_011491	4333.58	1.07043	2.10006	0.233285	1.59043e-06	1.00958e-05	1	1	up	mucin-19, transcript variant X2
AARA21_010384	22840.4	1.06898	2.09795	0.279667	4.87035e-05	0.000207712	1	1	up	myb-like protein Q, transcript variant X5
AARA21_003460	5.61808	1.06791	2.09639	1.14488	0.0412599	0.0753254	0	1		large subunit ribosomal RNA
AARA21_005921	7544.72	1.06781	2.09625	0.235309	2.13867e-06	1.3129e-05	1	1	up	calcyphosin-like protein, transcript variant X2
AARA21_002142	37124.9	1.0668	2.09479	0.722851	0.0339934	0.0637414	0	1		keratin, type I cytoskeletal 9-like
AARA21_011583	4956.99	1.06483	2.09192	0.256107	1.19846e-05	6.05201e-05	1	1	up	CDC42 small effector protein homolog, transcript variant X1
AARA21_003761	10264.8	1.06478	2.09185	0.168793	1.103e-10	2.37907e-09	1	1	up	ATP-binding cassette sub-family D member, transcript variant X2
AARA21_015592	405.255	1.06441	2.09131	0.422025	0.0037103	0.00935719	1	1	up	angiotensin-converting enzyme-like
AARA21_012531	3025.44	1.06385	2.0905	0.357789	0.000982466	0.00293032	1	1	up	transcription factor Ken 2, transcript variant X4
AARA21_008573	35251.5	1.06358	2.09012	0.200469	4.33734e-08	4.23755e-07	1	1	up	facilitated trehalose transporter Tret1, transcript variant X3
AARA21_012717	3609.01	1.0634	2.08985	0.229213	1.31787e-06	8.54747e-06	1	1	up	nascent polypeptide-associated complex subunit alpha, muscle-specific form, transcript variant X2
AARA21_007365	18195.5	1.06339	2.08984	0.290504	9.23464e-05	0.000364262	1	1	up	scavenger receptor class B member 1, transcript variant X5
AARA21_005807	14851.8	1.06288	2.0891	0.182757	2.33632e-09	3.35507e-08	1	1	up	lateral signaling target protein 2 homolog, transcript variant X2
AARA21_012470	54.079	1.06172	2.08742	0.44995	0.00570726	0.0136838	0	1		retinal homeobox protein Rx-like
AARA21_002235	4956.94	1.0616	2.08725	0.536262	0.0141371	0.0300467	0	1		phenoloxidase-activating factor 2-like
AARA21_004135	846.837	1.75749	3.38109	0.299863	1.91928e-10	3.84064e-09	1	1	up	luciferin 4-monooxygenase-like
AARA21_000286	10822	1.05828	2.08245	0.197369	3.18402e-08	3.23473e-07	1	1	up	box A-binding factor, transcript variant X4
AARA21_006105	96.9794	1.05822	2.08236	0.572727	0.0179654	0.0369976	0	1		3'-5' RNA helicase YTHDC2-like
AARA21_007042	13.4016	1.05663	2.08006	0.806499	0.0411446	0.0751466	0	1		nephrocan-like
AARA21_009172	171253	1.75471	3.37458	0.397003	1.60879e-06	1.01972e-05	1	1	up	vesicle transport protein GOT1B
AARA21_001512	839.333	1.05575	2.0788	0.303212	0.000179126	0.000649792	1	1	up	neural-cadherin-like
AARA21_007107	98.1688	1.05557	2.07853	0.432904	0.00474903	0.0116503	0	1		glycine receptor subunit alpha-1-like, transcript variant X3
AARA21_005970	13453.3	1.05555	2.07851	0.28226	6.89446e-05	0.000281533	1	1	up	receptor-type guanylate cyclase Gyc76C-like, transcript variant X2
AARA21_002285	24273.5	1.05367	2.07581	0.19997	5.36263e-08	5.12256e-07	1	1	up	E3 ubiquitin-protein ligase KCMF1
AARA21_012753	4960.63	1.05312	2.07502	0.313041	0.000283093	0.00097551	1	1	up	DNA N6-methyl adenine demethylase, transcript variant X1
AARA21_009862	378.021	1.05261	2.07428	0.44344	0.00574273	0.0137524	0	1		carbonic anhydrase-related protein 10, transcript variant X1
AARA21_000264	9522.01	1.05227	2.07379	0.252174	1.14404e-05	5.81142e-05	1	1	up	mucin-19
AARA21_004024	954.181	1.05174	2.07302	0.335122	0.00060565	0.00190862	1	1	up	transcription factor AP-2-epsilon, transcript variant X6
AARA21_015756	3584.28	1.05145	2.07262	0.254504	1.35705e-05	6.75741e-05	1	1	up	PDF receptor, transcript variant X3
AARA21_015228	789.009	1.05114	2.07217	0.460214	0.00725517	0.0168324	0	1		major facilitator superfamily domain-containing protein 6-like
AARA21_014933	566.817	1.05025	2.07089	0.421844	0.00406048	0.0101429	0	1		gonadotropin-releasing hormone receptor, transcript variant X2
AARA21_011266	403.592	1.75448	3.37405	0.656285	0.000933486	0.0028038	1	1	up	uncharacterized LOC120894319
AARA21_012396	11192.8	1.04821	2.06796	0.181518	2.83711e-09	3.94223e-08	1	1	up	von Willebrand factor A domain-containing protein 8
AARA21_001118	7766.62	1.74665	3.35579	0.289461	2.71668e-10	5.09555e-09	1	1	up	flocculation protein FLO11-like
AARA21_009914	1352.93	1.04551	2.06409	0.274813	5.21341e-05	0.000220806	1	1	up	nose resistant to fluoxetine protein 6-like
AARA21_006113	156747	1.04512	2.06354	0.223457	1.14483e-06	7.53482e-06	1	1	up	40S ribosomal protein S16
AARA21_010652	34.1152	1.04506	2.06345	1.39247	0.0390815	0.0719917	0	1		fibrinogen-like protein A
AARA21_013265	7125.39	1.04484	2.06313	0.275841	5.77049e-05	0.000240677	1	1	up	protein yellow-like, transcript variant X10
AARA21_002011	55797.7	1.04429	2.06235	0.194657	3.217e-08	3.26445e-07	1	1	up	choline-phosphate cytidylyltransferase B-like, transcript variant X3
AARA21_012115	2911.37	1.044	2.06193	0.169665	2.93803e-10	5.4472e-09	1	1	up	proton channel OtopLc, transcript variant X2
AARA21_002097	6419.53	1.74429	3.3503	0.430095	7.81961e-06	4.12298e-05	1	1	up	WAP four-disulfide core domain protein 12, transcript variant X3
AARA21_004419	26210.6	1.04291	2.06038	0.228087	1.88788e-06	1.17407e-05	1	1	up	microtubule-associated protein RP/EB family member 1, transcript variant X6
AARA21_007834	1370.31	1.73299	3.32416	0.247868	4.42596e-13	2.01232e-11	1	1	up	alpha-tocopherol transfer protein-like
AARA21_009117	5947.4	1.73296	3.32409	0.46032	2.52484e-05	0.000115736	1	1	up	CLIP domain-containing serine protease 14D-like
AARA21_013783	4448.2	1.73004	3.31736	0.187312	4.52744e-21	1.32397e-18	1	1	up	ATP-binding cassette sub-family G member 1, transcript variant X1
AARA21_005896	2133.57	1.04025	2.05658	0.32117	0.000456356	0.00148845	1	1	up	troponin C, isoallergen Bla g 6.0101-like, transcript variant X3
AARA21_003904	7723.17	1.03932	2.05526	0.194943	3.90871e-08	3.85685e-07	1	1	up	sodium-coupled monocarboxylate transporter 1-like, transcript variant X2
AARA21_012675	184.591	1.72931	3.3157	0.441136	1.50308e-05	7.40718e-05	1	1	up	uncharacterized LOC120895631
AARA21_015585	77674.8	1.03848	2.05406	0.16157	5.26894e-11	1.25315e-09	1	1	up	protein GDAP2 homolog, transcript variant X3
AARA21_000654	705.298	1.03791	2.05324	0.238211	5.03219e-06	2.78132e-05	1	1	up	hyaluronidase Tab y 2.0101-like, transcript variant X6
AARA21_015692	760.701	1.03759	2.0528	0.255252	1.84084e-05	8.83807e-05	1	1	up	ikaros family zinc finger protein-like, transcript variant X8
AARA21_006160	378.845	1.03647	2.0512	0.289269	0.000125056	0.000477761	1	1	up	nucleoside-triphosphatase THEP1
AARA21_000643	4402.25	1.03601	2.05055	0.283039	9.56081e-05	0.000375975	1	1	up	trithorax group protein osa, transcript variant X2
AARA21_003104	16794.9	1.0329	2.04613	0.137909	2.82128e-14	1.85212e-12	1	1	up	Na(+)/H(+) exchange regulatory cofactor-like protein nrfl-1, transcript variant X1
AARA21_000523	28398.2	1.03274	2.0459	0.258618	2.54589e-05	0.00011666	1	1	up	CD63 antigen
AARA21_006353	8559.01	1.728	3.31268	0.67472	0.0013028	0.00375772	1	1	up	antichymotrypsin-2-like
AARA21_001106	3359.04	1.03172	2.04446	0.232694	3.76499e-06	2.1502e-05	1	1	up	protein suppressor 2 of zeste, transcript variant X2
AARA21_005633	2279.76	1.03022	2.04234	0.174143	9.19281e-10	1.47119e-08	1	1	up	probable 39S ribosomal protein L49, mitochondrial
AARA21_007948	7747.25	1.02944	2.04123	0.288186	0.000136899	0.000516714	1	1	up	trypsin beta-like
AARA21_009372	87.7359	1.02891	2.04049	0.642375	0.0296673	0.0567375	0	1		xanthine dehydrogenase-like
AARA21_007998	2073.63	1.02802	2.03923	0.272411	6.14226e-05	0.000254533	1	1	up	putative odorant-binding protein A10
AARA21_005141	337.804	1.02738	2.03832	0.560767	0.0202953	0.0410016	0	1		DDB1- and CUL4-associated factor 10 homolog, transcript variant X3
AARA21_012540	2016.88	1.02732	2.03823	0.389108	0.00295785	0.00765613	1	1	up	probable G-protein coupled receptor Mth-like 5, transcript variant X4
AARA21_014054	6112.17	1.02724	2.03812	0.217259	8.91399e-07	6.01764e-06	1	1	up	cyclic AMP response element-binding protein B, transcript variant X7
AARA21_015026	4813.04	1.02638	2.03691	0.266894	4.67846e-05	0.000200726	1	1	up	(Lyso)-N-acylphosphatidylethanolamine lipase-like
AARA21_003877	7039.41	1.02563	2.03585	0.196247	6.97605e-08	6.45761e-07	1	1	up	3-hydroxy-3-methylglutaryl-coenzyme A reductase, transcript variant X2
AARA21_002179	13634.9	1.02553	2.0357	0.149595	2.90663e-12	1.01906e-10	1	1	up	cytohesin-1, transcript variant X4
AARA21_008612	973.376	1.025	2.03496	0.642611	0.0309575	0.0587335	0	1		CLIP domain-containing serine protease B15-like
AARA21_002442	14289.6	1.02428	2.03394	0.296691	0.000214992	0.000763328	1	1	up	serine-rich adhesin for platelets, transcript variant X8
AARA21_009781	41853.2	1.0241	2.03369	0.204403	2.21368e-07	1.77356e-06	1	1	up	eukaryotic translation initiation factor 4 gamma 3-like, transcript variant X1
AARA21_011088	10570.6	1.02181	2.03047	0.203265	1.99415e-07	1.61579e-06	1	1	up	DE-cadherin, transcript variant X1
AARA21_008507	1099.63	1.02172	2.03033	0.299638	0.00024757	0.000864681	1	1	up	DNA repair protein XRCC3
AARA21_000150	3778.71	1.02132	2.02977	0.46728	0.00987029	0.021927	0	1		sterol O-acyltransferase 1-like, transcript variant X2
AARA21_010591	10.9988	1.02047	2.02858	0.861897	0.0493429	0.0878477	0	1		5.8S ribosomal RNA
AARA21_012274	8507.41	1.01783	2.02488	0.17265	1.54142e-09	2.32514e-08	1	1	up	ceramide phosphoethanolamine synthase
AARA21_012681	3235.01	1.01691	2.02359	0.338711	0.00101272	0.00301008	1	1	up	dentin sialophosphoprotein, transcript variant X8
AARA21_006215	4982.74	1.01661	2.02315	0.505425	0.0151619	0.0319451	0	1		dihydroceramide fatty acyl 2-hydroxylase FAH2, transcript variant X1
AARA21_015136	8035.31	1.01629	2.0227	0.266012	5.11378e-05	0.000217159	1	1	up	protein turtle, transcript variant X14
AARA21_004661	43.5309	1.01618	2.02255	0.532454	0.0169413	0.0352211	0	1		tigger transposable element-derived protein 1-like
AARA21_013439	8170.15	1.0161	2.02244	0.466649	0.0107012	0.023505	0	1		homeobox protein Hox-D1, transcript variant X2
AARA21_001033	10965.2	1.01556	2.02169	0.322879	0.00061927	0.00194725	1	1	up	dipeptidyl peptidase 4, transcript variant X6
AARA21_007534	488273	1.01548	2.02157	0.409813	0.00478934	0.0117402	0	1		ATP synthase subunit alpha, mitochondrial
AARA21_009070	12406.6	1.0147	2.02049	0.237048	7.50654e-06	3.97803e-05	1	1	up	galectin-9B-like, transcript variant X2
AARA21_007696	5616.17	1.01343	2.0187	0.769682	0.0466957	0.0837049	0	1		methyltransferase-like protein 22, transcript variant X1
AARA21_000036	16795.4	1.01203	2.01674	0.209596	5.65124e-07	4.01516e-06	1	1	up	GAS2-like protein pickled eggs, transcript variant X2
AARA21_004957	9676.63	1.72066	3.29587	0.419714	6.69165e-06	3.58308e-05	1	1	up	protein takeout-like
AARA21_004955	93.6519	1.71978	3.29387	0.708336	0.0018431	0.0050782	1	1	up	activating signal cointegrator 1 complex subunit 2 homolog
AARA21_000293	123.678	1.01003	2.01395	0.39669	0.00379345	0.0095426	1	1	up	endothelin-converting enzyme homolog, transcript variant X2
AARA21_004916	32958.1	1.00902	2.01254	0.267171	6.38122e-05	0.000262911	1	1	up	fibronectin type-III domain-containing protein 3A-like, transcript variant X1
AARA21_004538	46004.3	1.00819	2.01138	0.49725	0.0143066	0.0303516	0	1		phenoloxidase-activating factor 2-like
AARA21_002124	62.0096	1.00727	2.0101	0.360813	0.00171714	0.00478857	1	1	up	arginine kinase-like
AARA21_011244	42325	1.00726	2.01009	0.179675	8.69963e-09	1.04811e-07	1	1	up	cofilin/actin-depolymerizing factor homolog, transcript variant X1
AARA21_003105	1633.36	1.00711	2.00989	0.357065	0.00180753	0.0049984	1	1	up	leukocyte receptor cluster member 1 homolog
AARA21_002646	2248.9	1.00707	2.00983	0.176778	5.14835e-09	6.63101e-08	1	1	up	small integral membrane protein 20-like
AARA21_003643	116.221	1.007	2.00973	0.316162	0.000524786	0.00168432	1	1	up	LIM homeobox transcription factor 1-beta
AARA21_000736	4630.73	1.00688	2.00956	0.260463	4.4435e-05	0.000191475	1	1	up	gremlin-1-like, transcript variant X4
AARA21_009597	70626.9	1.00685	2.00953	0.208141	5.4808e-07	3.90701e-06	1	1	up	dystonin, transcript variant X27
AARA21_000168	6325.92	1.71596	3.28515	0.546035	0.000238347	0.000836327	1	1	up	general odorant-binding protein 99a
AARA21_010490	16965.3	1.00525	2.00729	0.200052	2.18429e-07	1.75329e-06	1	1	up	ras-related protein Rap-2a, transcript variant X1
AARA21_002147	164.55	1.00514	2.00713	0.307646	0.000397603	0.0013199	1	1	up	armadillo repeat-containing protein 2, transcript variant X2
AARA21_002457	755.111	1.0048	2.00667	0.224149	2.96834e-06	1.7528e-05	1	1	up	paired box protein Pax-1-like
AARA21_013966	7872.32	1.00411	2.00571	0.736979	0.0438092	0.0793375	0	1		arp2/3 complex-activating protein rickA-like
AARA21_001426	20139.1	1.71118	3.27429	0.212261	1.39105e-16	1.65728e-14	1	1	up	uncharacterized LOC120901452
AARA21_012624	5470.98	1.00262	2.00363	0.16439	4.49196e-10	7.87439e-09	1	1	up	netrin-B-like, transcript variant X2
AARA21_005818	444.282	1.00215	2.00299	0.534605	0.019968	0.0404547	0	1		transmembrane protease serine 9-like
AARA21_003712	719710	1.00196	2.00272	0.709934	0.043829	0.0793623	0	1		ADP,ATP carrier protein 2
AARA21_014578	728.667	1.00135	2.00187	0.284789	0.000163307	0.000600878	1	1	up	protein dpy-30 homolog
AARA21_014033	144.791	1.00116	2.0016	0.518793	0.0178054	0.0367209	0	1		glucose dehydrogenase [FAD, quinone]
AARA21_007055	33051.2	1.00099	2.00137	0.199177	1.48781e-07	1.24068e-06	1	1	up	hippocampus abundant transcript 1 protein, transcript variant X5
AARA21_005317	538.33	1.00095	2.00131	0.323364	0.000755693	0.00232286	1	1	up	tetratricopeptide repeat protein 28, transcript variant X2
AARA21_003677	7568.73	1.00022	2.00031	0.45582	0.00995484	0.0220919	0	1		mycosubtilin synthase subunit C, transcript variant X1
AARA21_012232	79.6603	0.999893	1.99985	0.433634	0.00758878	0.0174834	0	0		zinc finger protein 431-like
AARA21_004357	6.41741	0.999167	1.99885	0.729238	0.0444789	0.0803694	0	0		large subunit ribosomal RNA
AARA21_012421	2332.9	0.999122	1.99878	0.375897	0.00296667	0.00767587	1	0		ATP synthase membrane subunit DAPIT, mitochondrial-like, transcript variant X1
AARA21_014122	10.1639	0.998831	1.99838	0.929162	0.0563854	0.0981215	0	0		general odorant-binding protein 45-like
AARA21_002480	2799.85	0.997382	1.99637	0.279981	0.000147306	0.000550506	1	0		KH domain-containing, RNA-binding, signal transduction-associated protein 2-like, transcript variant X9
AARA21_011263	4564.26	0.996715	1.99545	0.224675	3.78186e-06	2.15792e-05	1	0		AF4/FMR2 family member lilli, transcript variant X1
AARA21_015334	12164.2	0.995537	1.99382	0.222943	3.33504e-06	1.94436e-05	1	0		protein daughterless, transcript variant X1
AARA21_004350	14669.8	0.99534	1.99355	0.244946	1.99258e-05	9.45374e-05	1	0		6-phosphogluconate dehydrogenase, decarboxylating, transcript variant X1
AARA21_007938	15279.7	0.993756	1.99136	0.255385	4.11014e-05	0.000179332	1	0		NADH dehydrogenase [ubiquinone] 1 alpha subcomplex subunit 5
AARA21_000179	287110	0.993499	1.99101	0.563001	0.0254295	0.0497644	0	0		phosphate carrier protein, mitochondrial-like, transcript variant X1
AARA21_002585	1963.69	0.99311	1.99047	0.243533	1.92256e-05	9.16544e-05	1	0		zwei Ig domain protein zig-8-like
AARA21_011603	65562.5	0.993054	1.99039	0.228076	5.71103e-06	3.10451e-05	1	0		40S ribosomal protein S29
AARA21_013974	11197.7	0.992559	1.98971	0.331946	0.0010911	0.00321852	1	0		protein bark beetle, transcript variant X1
AARA21_007407	4428.85	0.992063	1.98903	0.237463	1.21802e-05	6.13158e-05	1	0		G-protein coupled receptor moody-like, transcript variant X1
AARA21_000997	2604.9	0.991842	1.98872	0.328866	0.000981854	0.00292985	1	0		sorbitol dehydrogenase-like, transcript variant X2
AARA21_014660	4098.03	0.991222	1.98787	0.176845	8.75828e-09	1.05419e-07	1	0		39S ribosomal protein L15, mitochondrial
AARA21_007957	11311.8	0.990982	1.98754	0.209143	8.88485e-07	6.00427e-06	1	0		protein phosphatase inhibitor 2, transcript variant X2
AARA21_011629	2736.27	0.990034	1.98623	0.30209	0.000420504	0.00138592	1	0		32 kDa beta-galactoside-binding lectin lec-3-like
AARA21_012879	17068.7	0.989615	1.98565	0.230339	7.28265e-06	3.87054e-05	1	0		vinculin, transcript variant X3
AARA21_012339	26189.8	0.989098	1.98494	0.307538	0.0005165	0.00166145	1	0		eukaryotic translation initiation factor 2 subunit 2, transcript variant X1
AARA21_004723	16365.7	0.988865	1.98462	0.189325	7.5522e-08	6.93606e-07	1	0		lysophosphatidylserine lipase ABHD12, transcript variant X3
AARA21_013830	28642.8	0.988599	1.98426	0.409317	0.00588058	0.0140355	0	0		pyruvate dehydrogenase E1 component subunit beta, mitochondrial
AARA21_012198	3129.01	0.988132	1.98362	0.183566	3.35841e-08	3.37862e-07	1	0		CD109 antigen, transcript variant X2
AARA21_006515	1763.27	0.986232	1.981	0.196524	2.28632e-07	1.8193e-06	1	0		brother of CDO, transcript variant X3
AARA21_011093	558.06	0.985464	1.97995	0.227194	6.57847e-06	3.52541e-05	1	0		fas-associated death domain protein
AARA21_009230	12864.6	0.985355	1.9798	0.263823	7.80763e-05	0.000313842	1	0		ras GTPase-activating protein raskol, transcript variant X3
AARA21_001978	4111.64	0.985148	1.97952	0.23226	8.8078e-06	4.58331e-05	1	0		NEDD8
AARA21_006182	4.75654	0.984892	1.97917	1.66317	0.0248988	0.0489045	0	0		large subunit ribosomal RNA
AARA21_007571	29.885	0.984552	1.9787	0.63409	0.0347381	0.0649674	0	0		glucose dehydrogenase [FAD, quinone]-like
AARA21_009648	2832.97	0.984222	1.97825	0.260182	6.46052e-05	0.000266008	1	0		mucin-5AC, transcript variant X3
AARA21_012846	196904	0.983263	1.97693	0.226296	4.49567e-06	2.51722e-05	1	0		40S ribosomal protein S25
AARA21_002453	8555.1	0.982287	1.97559	0.294886	0.000354194	0.00119335	1	0		protein FAM107B, transcript variant X1
AARA21_011918	6561.97	0.980431	1.97306	0.228321	7.25615e-06	3.85965e-05	1	0		zinc finger protein BRUTUS, transcript variant X1
AARA21_015566	11.0268	0.980423	1.97304	1.23764	0.0505047	0.0895348	0	0		endochitinase-like
AARA21_013013	2867.86	0.97876	1.97077	0.238748	1.74731e-05	8.44893e-05	1	0		NADH dehydrogenase (ubiquinone) complex I, assembly factor 6 homolog
AARA21_012839	1307.6	0.977749	1.96939	0.233737	1.26273e-05	6.33187e-05	1	0		opioid-binding protein/cell adhesion molecule, transcript variant X4
AARA21_000198	7486.52	0.977352	1.96885	0.195544	2.65724e-07	2.08353e-06	1	0		inositol-pentakisphosphate 2-kinase, transcript variant X1
AARA21_006432	1326.03	0.976663	1.96791	0.304274	0.00060783	0.00191404	1	0		protein single-minded-like, transcript variant X1
AARA21_007797	467.909	0.97661	1.96784	0.526816	0.0215946	0.0432261	0	0		endoplasmic reticulum metallopeptidase 1-like
AARA21_008569	3569.1	0.976529	1.96773	0.302314	0.00050448	0.00162726	1	0		guanylate cyclase soluble subunit beta-1, transcript variant X3
AARA21_000655	93264.2	0.976354	1.96749	0.216861	2.90312e-06	1.71682e-05	1	0		60S ribosomal protein L39
AARA21_013134	9344.54	0.976252	1.96735	0.657456	0.0400714	0.07351	0	0		fatty acid synthase-like
AARA21_013737	4392.96	0.974058	1.96436	0.255606	5.85239e-05	0.000243856	1	0		proton channel OtopLc, transcript variant X1
AARA21_003666	339.526	0.974054	1.96435	0.237413	1.75677e-05	8.48195e-05	1	0		trichohyalin, transcript variant X2
AARA21_001464	48234.8	0.973921	1.96417	0.276782	0.000182024	0.000659177	1	0		cytochrome c oxidase subunit 6C
AARA21_014570	5.3378	0.97353	1.96364	0.98704	0.0612523	0.105042	0	0		chaperone protein DnaJ-like
AARA21_013845	20870.8	0.973483	1.96358	0.299677	0.000477376	0.00154955	1	0		dentin sialophosphoprotein-like, transcript variant X1
AARA21_011230	243.151	0.972825	1.96268	0.356366	0.00257383	0.00677944	1	0		homeobox protein rough
AARA21_000384	149.084	0.972574	1.96234	0.519894	0.0207401	0.0417822	0	0		glyoxylate reductase/hydroxypyruvate reductase-like, transcript variant X4
AARA21_003914	10.8117	0.971857	1.96136	0.989355	0.0581448	0.100598	0	0		alpha-N-acetylgalactosaminidase
AARA21_008983	32244.7	0.971706	1.96116	0.236077	1.65742e-05	8.06277e-05	1	0		kinesin-like protein unc-104, transcript variant X2
AARA21_009390	211815	0.971481	1.96085	0.20063	5.6154e-07	3.9941e-06	1	0		S-adenosylmethionine synthase, transcript variant X2
AARA21_014680	109076	0.971328	1.96064	0.319042	0.000953926	0.00285627	1	0		dihydrolipoyl dehydrogenase, mitochondrial
AARA21_005759	6035.59	0.970133	1.95902	0.218485	3.86614e-06	2.19822e-05	1	0		small conductance calcium-activated potassium channel protein, transcript variant X11
AARA21_010676	264640	0.970042	1.9589	0.238329	2.0328e-05	9.62325e-05	1	0		40S ribosomal protein S26
AARA21_004067	9802.42	0.969707	1.95844	0.275989	0.000185443	0.000668747	1	0		GTPase-activating protein CdGAPr, transcript variant X1
AARA21_010753	5.17791	0.969362	1.95797	1.1655	0.058945	0.101723	0	0		cGMP-dependent protein kinase egl-4-like, transcript variant X2
AARA21_002304	121943	0.968712	1.95709	0.201892	7.04225e-07	4.87689e-06	1	0		40S ribosomal protein S28
AARA21_000139	993.331	0.96776	1.9558	0.237633	1.91782e-05	9.14625e-05	1	0		bcl-2-related ovarian killer protein, transcript variant X4
AARA21_006669	1646.72	0.966951	1.9547	0.379056	0.00422037	0.0104712	0	0		homeobox protein aristaless, transcript variant X1
AARA21_001757	22.7311	0.966313	1.95384	0.633388	0.0365151	0.0678077	0	0		U11 spliceosomal RNA
AARA21_001843	2065.91	0.96612	1.95358	0.147077	2.22203e-11	5.96887e-10	1	0		tryptophan--tRNA ligase, mitochondrial
AARA21_003759	287.066	0.965833	1.95319	0.283044	0.000291544	0.00100141	1	0		dendritic arbor reduction protein 1-like, transcript variant X1
AARA21_013258	529.039	0.965788	1.95313	0.959718	0.0620624	0.106233	0	0		acyl-CoA synthetase short-chain family member 3, mitochondrial
AARA21_009902	15690.8	0.965759	1.95309	0.150093	5.51939e-11	1.29472e-09	1	0		type 1 phosphatidylinositol 4,5-bisphosphate 4-phosphatase
AARA21_011056	26964.5	0.965721	1.95304	0.146967	2.24217e-11	6.01042e-10	1	0		RAC serine/threonine-protein kinase, transcript variant X1
AARA21_012300	92.4556	0.965645	1.95294	1.00932	0.0594986	0.102499	0	0		endoplasmic reticulum metallopeptidase 1-like
AARA21_005868	8259.72	0.964977	1.95203	0.274639	0.000186317	0.000671336	1	0		retinol dehydrogenase 12-like
AARA21_004168	6.44886	0.964079	1.95082	0.915927	0.0608628	0.104486	0	0		E3 SUMO-protein ligase ZBED1-like
AARA21_008379	65.5467	0.963256	1.94971	0.53379	0.0237845	0.04701	0	0		odorant receptor 4-like
AARA21_004167	11978.5	0.962829	1.94913	0.198224	5.25232e-07	3.76919e-06	1	0		fasciculation and elongation protein zeta-2
AARA21_004575	112.35	0.962793	1.94908	0.393674	0.00517281	0.0125488	0	0		transmembrane protein 145-like
AARA21_003209	8.1785	0.961223	1.94696	0.975867	0.0601001	0.103425	0	0		tubulin alpha chain-like
AARA21_008543	7768.43	0.959277	1.94434	0.183335	7.40735e-08	6.81762e-07	1	0		integumentary mucin C.1-like, transcript variant X2
AARA21_010092	4008.79	0.959181	1.94421	0.341149	0.00202527	0.00550701	1	0		sodium-coupled monocarboxylate transporter 1-like, transcript variant X3
AARA21_012963	7314.42	0.958948	1.94389	0.22025	5.10955e-06	2.81803e-05	1	0		protein unzipped, transcript variant X2
AARA21_009136	5.93444	0.958787	1.94368	1.54895	0.0277162	0.0534909	0	0		general odorant-binding protein 67
AARA21_009900	457.608	0.958584	1.9434	0.320062	0.00113861	0.00334029	1	0		G-protein coupled receptor moody
AARA21_001331	5992.92	0.95855	1.94336	0.23946	2.67531e-05	0.000121939	1	0		ras-associated and pleckstrin homology domains-containing protein 1, transcript variant X1
AARA21_012663	1859.39	0.957578	1.94205	0.203267	1.10571e-06	7.31095e-06	1	0		sodium- and chloride-dependent glycine transporter 2-like
AARA21_007199	93.8897	0.957473	1.9419	0.293362	0.000431224	0.00141581	1	0		neurotrimin-like
AARA21_000843	1948.98	0.956611	1.94075	0.250542	5.74954e-05	0.000240037	1	0		enoyl-CoA delta isomerase 2
AARA21_001559	4692.35	0.956157	1.94014	0.288045	0.000383321	0.00127612	1	0		adenosine deaminase 2-like
AARA21_001339	5757.48	0.955542	1.93931	0.378818	0.00463643	0.0114132	0	0		glycerol kinase
AARA21_012354	66819	0.955472	1.93921	0.214509	3.74176e-06	2.13884e-05	1	0		four and a half LIM domains protein 2, transcript variant X5
AARA21_008370	255.471	0.955176	1.93882	0.291675	0.000545717	0.00173783	1	0		neuropeptide Y receptor type 2-like, transcript variant X7
AARA21_000840	75.4956	0.954952	1.93851	0.419193	0.00804718	0.0184011	0	0		barH-like 1 homeobox protein
AARA21_012323	72690.9	0.954734	1.93822	0.19463	4.19023e-07	3.08619e-06	1	0		ATP-dependent RNA helicase bel, transcript variant X1
AARA21_005878	12113.2	0.954527	1.93794	0.162719	1.99972e-09	2.93392e-08	1	0		glucose-6-phosphate 1-dehydrogenase, transcript variant X2
AARA21_011410	109.454	0.953656	1.93677	0.623689	0.0391393	0.0720775	0	0		trypsin-1-like
AARA21_015615	200.168	0.952943	1.93582	0.327369	0.00151646	0.00429124	1	0		trypsin-1-like
AARA21_011696	17.5721	0.952467	1.93518	0.598008	0.0391731	0.0721294	0	0		putative gustatory receptor 2a
AARA21_008993	4306.02	0.952452	1.93516	0.242666	3.7744e-05	0.000165695	1	0		STAM-binding protein
AARA21_006222	513.9	0.952399	1.93509	0.474512	0.0165376	0.0345269	0	0		ATP-binding cassette sub-family G member 4-like
AARA21_015250	310.188	0.951375	1.93372	0.209988	2.50196e-06	1.50715e-05	1	0		suppressor of lurcher protein 1, transcript variant X6
AARA21_013981	46.5882	0.950648	1.93274	0.46453	0.0144045	0.0305343	0	0		coiled-coil domain-containing protein lobo
AARA21_000656	8.09906	0.949525	1.93124	1.25604	0.049322	0.0878253	0	0		glucose dehydrogenase [FAD, quinone]-like
AARA21_001431	11934.5	0.948001	1.9292	0.218	6.11267e-06	3.29915e-05	1	0		WD repeat domain phosphoinositide-interacting protein 2, transcript variant X2
AARA21_008938	157.157	0.946617	1.92735	0.481475	0.0176769	0.0364911	0	0		putative mediator of RNA polymerase II transcription subunit 26, transcript variant X1
AARA21_001084	9245.54	0.946521	1.92722	0.256659	9.94256e-05	0.000388848	1	0		adapter molecule Crk, transcript variant X2
AARA21_012603	25671.1	0.946452	1.92713	0.322494	0.0014083	0.00402322	1	0		protein timeless, transcript variant X6
AARA21_015387	1266.67	0.946179	1.92676	0.275897	0.000258214	0.000897957	1	0		oxidoreductase-like domain-containing protein 1
AARA21_009392	1427.75	0.945114	1.92534	0.264487	0.000158421	0.000585074	1	0		probable tRNA N6-adenosine threonylcarbamoyltransferase
AARA21_007045	1628.3	0.944828	1.92496	0.556273	0.0308008	0.0584706	0	0		C-type lectin 37Db-like
AARA21_005274	3958.13	0.944508	1.92453	0.185462	1.73351e-07	1.42434e-06	1	0		ecto-NOX disulfide-thiol exchanger 2
AARA21_004003	133121	0.944317	1.92428	0.196146	6.72817e-07	4.68459e-06	1	0		40S ribosomal protein S17
AARA21_002870	5072.88	0.943641	1.92338	0.621618	0.0433398	0.0786201	0	0		ficolin-2-like
AARA21_005994	1105.37	0.943554	1.92326	0.268305	0.000193196	0.000693984	1	0		mucin-5AC-like
AARA21_004900	4431.68	0.943321	1.92295	0.905118	0.0641076	0.109182	0	0		glycine-rich cell wall structural protein-like
AARA21_013150	99.6233	0.942979	1.92249	0.489837	0.0190898	0.0389269	0	0		dynein regulatory complex protein 9-like, transcript variant X2
AARA21_012523	8432.19	0.942308	1.9216	0.383142	0.00565514	0.0135679	0	0		membrane-associated guanylate kinase, WW and PDZ domain-containing protein 1, transcript variant X3
AARA21_003540	9807.07	0.942296	1.92158	0.197882	8.67349e-07	5.87069e-06	1	0		inositol 1,4,5-trisphosphate receptor, transcript variant X1
AARA21_003189	10029.3	0.941843	1.92098	0.393858	0.00662211	0.0155771	0	0		probable serine/threonine-protein kinase yakA, transcript variant X1
AARA21_001396	1116.43	0.941658	1.92073	0.318715	0.00132093	0.00380149	1	0		iodotyrosine deiodinase 1
AARA21_007164	192.398	0.940952	1.91979	0.414592	0.00932322	0.0208557	0	0		protein embryonic gonad, transcript variant X2
AARA21_009080	10111.8	0.940074	1.91863	0.237272	3.31884e-05	0.00014807	1	0		rho GTPase-activating protein 190, transcript variant X2
AARA21_001626	8119.55	0.938285	1.91625	0.352571	0.00290879	0.00754127	1	0		luciferin sulfotransferase-like, transcript variant X2
AARA21_012097	12490.8	0.937041	1.9146	0.486438	0.0202002	0.040861	0	0		leucine-rich PPR motif-containing protein, mitochondrial
AARA21_006007	4493.83	0.936911	1.91442	0.232129	2.36116e-05	0.000109402	1	0		neprilysin-4, transcript variant X1
AARA21_013326	21098.5	0.936848	1.91434	0.209454	3.52215e-06	2.03775e-05	1	0		serine/threonine-protein phosphatase PP1-beta catalytic subunit, transcript variant X3
AARA21_001527	14900	0.936558	1.91396	0.217931	7.82171e-06	4.12298e-05	1	0		putative phosphatidate phosphatase
AARA21_013781	5671.99	0.936244	1.91354	0.267506	0.000204314	0.000728633	1	0		pH-sensitive chloride channel 2
AARA21_015579	16613.7	0.935284	1.91227	0.356183	0.00360946	0.00913692	1	0		lysozyme c-1-like, transcript variant X4
AARA21_012673	5.16113	0.9352	1.91216	0.981203	0.0697324	0.117257	0	0		U1 spliceosomal RNA
AARA21_003279	3275.36	0.93314	1.90943	0.210994	3.79649e-06	2.16435e-05	1	0		transmembrane protease serine 9-like
AARA21_000961	9268.97	0.932837	1.90903	0.258443	0.000136941	0.000516723	1	0		serine-rich adhesin for platelets
AARA21_014185	101468	0.932612	1.90873	0.347576	0.00308847	0.00795422	1	0		dihydrolipoyllysine-residue succinyltransferase component of 2-oxoglutarate dehydrogenase complex, mitochondrial
AARA21_010903	3541.5	0.931903	1.90779	0.360669	0.003682	0.00929676	1	0		alpha-tocopherol transfer protein-like
AARA21_014887	42.7614	0.931511	1.90727	0.558022	0.0307734	0.0584358	0	0		odorant receptor 4-like
AARA21_004524	1177.83	0.930292	1.90566	0.232248	2.80074e-05	0.00012716	1	0		5-formyltetrahydrofolate cyclo-ligase, transcript variant X3
AARA21_011443	3180.5	0.929778	1.90498	0.174434	4.42562e-08	4.31398e-07	1	0		mitochondrial import receptor subunit TOM7 homolog
AARA21_009022	649.65	0.929263	1.9043	0.413772	0.00995032	0.0220895	0	0		inactive hydroxysteroid dehydrogenase-like protein 1
AARA21_007774	7927.43	0.929206	1.90423	0.214207	5.53779e-06	3.02055e-05	1	0		N-acetyl-D-glucosamine kinase
AARA21_004211	673.857	0.92782	1.9024	0.241826	6.09995e-05	0.000253024	1	0		migration and invasion enhancer 1
AARA21_001796	16159.7	0.927691	1.90223	0.165523	9.77865e-09	1.15539e-07	1	0		CCR4-NOT transcription complex subunit 3
AARA21_005511	96.7428	0.926377	1.9005	0.341267	0.00287757	0.00747993	1	0		EF-hand domain-containing family member C2
AARA21_013189	3155.36	0.925308	1.89909	0.221172	1.32628e-05	6.62726e-05	1	0		ras-related and estrogen-regulated growth inhibitor-like protein
AARA21_004859	19658.6	0.92506	1.89876	0.187405	3.72356e-07	2.78877e-06	1	0		serine/threonine-protein kinase mig-15, transcript variant X6
AARA21_013331	20.3188	0.924953	1.89862	0.615725	0.0407312	0.0745288	0	0		odorant receptor Or2-like
AARA21_000327	66735	0.924394	1.89789	0.493938	0.0232415	0.0460855	0	0		isocitrate dehydrogenase [NAD] subunit beta, mitochondrial, transcript variant X2
AARA21_001181	24868.2	0.924158	1.89758	0.166815	1.42383e-08	1.5917e-07	1	0		cdc42 homolog, transcript variant X2
AARA21_005373	12.4857	0.923921	1.89726	0.683705	0.0523186	0.0922295	0	0		5.8S ribosomal RNA
AARA21_008072	1940.16	0.923131	1.89623	0.256149	0.000140195	0.000527761	1	0		protein amalgam, transcript variant X1
AARA21_012261	51360.4	0.922921	1.89595	0.356459	0.00409135	0.0102062	0	0		NADH dehydrogenase [ubiquinone] 1 alpha subcomplex subunit 9, mitochondrial
AARA21_011523	173510	0.922603	1.89553	0.609438	0.0434276	0.078735	0	0		elongation factor 1-alpha 1-like, transcript variant X4
AARA21_008514	87626.9	0.922503	1.8954	0.241039	5.93095e-05	0.000246809	1	0		UTP--glucose-1-phosphate uridylyltransferase, transcript variant X3
AARA21_009465	699.549	0.920968	1.89338	0.369844	0.00530516	0.0128215	0	0		UPF0687 protein C20orf27 homolog
AARA21_006439	21.5617	0.9209	1.8933	0.999319	0.0672035	0.113563	0	0		NPC intracellular cholesterol transporter 2-like
AARA21_010891	7498.63	0.920377	1.89261	0.18542	3.22799e-07	2.46936e-06	1	0		probable E3 ubiquitin-protein ligase makorin-2, transcript variant X2
AARA21_002632	10287.9	0.919987	1.8921	0.655532	0.0513764	0.0908424	0	0		CLIP domain-containing serine protease 14D-like, transcript variant X1
AARA21_006359	140.511	0.918879	1.89065	0.412383	0.0101448	0.0224477	0	0		meiotic recombination protein SPO11
AARA21_013518	1218.04	0.91865	1.89034	0.273675	0.000355752	0.00119736	1	0		endoplasmic reticulum metallopeptidase 1-like
AARA21_010378	88.7354	0.918621	1.89031	0.735832	0.0605959	0.104139	0	0		lysozyme c-1-like
AARA21_009284	77743.3	0.917653	1.88904	0.336537	0.00278676	0.00726952	1	0		cytochrome c oxidase subunit 5B, mitochondrial-like
AARA21_013702	108623	0.916589	1.88765	0.340818	0.0031043	0.00799019	1	0		enolase, transcript variant X1
AARA21_005542	287.721	0.915933	1.88679	0.43946	0.014253	0.0302679	0	0		heparan sulfate glucosamine 3-O-sulfotransferase 5
AARA21_011870	26136.4	0.915536	1.88627	0.44921	0.0164491	0.0343532	0	0		apolipophorin-3-like
AARA21_009318	229.457	0.915514	1.88624	0.491278	0.0240644	0.047483	0	0		transmembrane protease serine 9-like
AARA21_012559	11813.8	0.915152	1.88577	0.27773	0.000445678	0.00145769	1	0		chaoptin-like, transcript variant X1
AARA21_006243	2564.41	0.914811	1.88532	0.191884	9.73665e-07	6.52168e-06	1	0		putative defense protein Hdd11-like
AARA21_015218	5102.36	0.913882	1.88411	0.151662	8.15886e-10	1.3205e-08	1	0		39S ribosomal protein L32, mitochondrial
AARA21_009831	4960.8	0.913685	1.88385	0.230922	3.51805e-05	0.000155396	1	0		protein preli-like
AARA21_009586	116516	0.913582	1.88372	0.237191	4.2707e-05	0.00018502	1	0		40S ribosomal protein S24
AARA21_008609	31797.4	0.913581	1.88372	0.341702	0.00324437	0.00830256	1	0		catalase-like
AARA21_003265	188.312	0.91228	1.88202	0.428416	0.0132111	0.0283076	0	0		hybrid signal transduction histidine kinase A-like
AARA21_009614	6991.08	0.912173	1.88188	0.379295	0.00683472	0.0160041	0	0		probable peroxisomal acyl-coenzyme A oxidase 1
AARA21_011611	157420	0.912105	1.88179	0.431845	0.0141704	0.0301074	0	0		cytochrome b-c1 complex subunit 2, mitochondrial
AARA21_006296	1634.77	0.911768	1.88135	0.193331	1.10771e-06	7.32047e-06	1	0		inactive hydroxysteroid dehydrogenase-like protein 1
AARA21_012035	193.747	0.910641	1.87988	0.276272	0.00040378	0.00133628	1	0		angiotensin-converting enzyme-like
AARA21_005514	8344.89	0.910433	1.87961	0.132257	2.79896e-12	9.92128e-11	1	0		ubiquitin carboxyl-terminal hydrolase 3-like
AARA21_007238	6365.28	0.910432	1.87961	0.631611	0.0494024	0.0878835	0	0		protein-glucosylgalactosylhydroxylysine glucosidase-like
AARA21_000708	44258	0.910327	1.87947	0.162508	1.02468e-08	1.20187e-07	1	0		supervillin, transcript variant X3
AARA21_013435	14249.4	0.909008	1.87775	0.256112	0.000178302	0.000647534	1	0		protein D2-like
AARA21_013105	14.3547	0.908912	1.87763	0.682366	0.0581436	0.100598	0	0		farnesol dehydrogenase-like
AARA21_011923	23455.5	0.908718	1.87738	0.152818	1.3251e-09	2.04438e-08	1	0		kinesin heavy chain, transcript variant X2
AARA21_006754	3.8103	0.907962	1.87639	1.16083	0.0589043	0.101666	0	0		large subunit ribosomal RNA
AARA21_010370	13765.7	0.907958	1.87639	0.199131	2.18922e-06	1.33882e-05	1	0		histone deacetylase 4, transcript variant X4
AARA21_001526	44.8625	0.90747	1.87575	0.595336	0.0451686	0.0813756	0	0		protein A16
AARA21_001800	3685.17	0.906979	1.87512	0.256071	0.000183491	0.000663383	1	0		protein tipE, transcript variant X2
AARA21_013350	1659.62	0.905336	1.87298	0.328991	0.00260614	0.00685331	1	0		alpha-tocopherol transfer protein-like
AARA21_000173	1363.44	0.903452	1.87054	0.504116	0.0281111	0.0541152	0	0		solute carrier family 52, riboflavin transporter, member 3-A
AARA21_008233	41.5081	0.903	1.86995	0.874637	0.0756728	0.12562	0	0		zinc metalloproteinase nas-4, transcript variant X1
AARA21_001844	4556.01	0.902801	1.86969	0.209001	7.97552e-06	4.19203e-05	1	0		dual specificity protein phosphatase CDC14C, transcript variant X3
AARA21_015138	3267.03	0.902748	1.86962	0.190194	9.93963e-07	6.64035e-06	1	0		cGMP-dependent 3',5'-cyclic phosphodiesterase-like, transcript variant X1
AARA21_009086	2167.19	0.902048	1.86872	0.358853	0.00518224	0.0125693	0	0		hydroxyacyl-coenzyme A dehydrogenase, mitochondrial-like
AARA21_010506	7267.99	0.90162	1.86816	0.206127	5.86266e-06	3.18022e-05	1	0		fumarylacetoacetate hydrolase domain-containing protein 2-like, transcript variant X1
AARA21_005053	294.511	0.901508	1.86802	0.541836	0.0354529	0.0661216	0	0		venom protease-like
AARA21_003281	24.5231	0.901011	1.86737	0.728957	0.0703751	0.118142	0	0		protein lin-28 homolog
AARA21_012091	4229.95	0.900443	1.86664	0.250569	0.000169919	0.000621299	1	0		homeobox protein PKNOX2-like, transcript variant X2
AARA21_001697	345.843	0.900189	1.86631	0.355	0.00490176	0.0119702	0	0		alpha-tocopherol transfer protein-like, transcript variant X1
AARA21_004599	516358	0.900062	1.86615	0.193045	1.52123e-06	9.72364e-06	1	0		polyadenylate-binding protein, transcript variant X4
AARA21_007065	3060.89	0.898987	1.86476	0.402244	0.0108078	0.0237149	0	0		sodium/potassium/calcium exchanger 4-like
AARA21_000835	4022.65	0.898442	1.86405	0.284612	0.000732664	0.00226071	1	0		toll-like receptor 7
AARA21_014081	767.369	0.898417	1.86402	0.214329	1.41698e-05	7.01782e-05	1	0		arrestin domain-containing protein 4
AARA21_014800	93.7953	0.89814	1.86366	0.382521	0.00823158	0.0187461	0	0		probable serine/threonine-protein kinase yakA
AARA21_001567	13787.4	0.898076	1.86358	0.18955	1.04133e-06	6.928e-06	1	0		GILT-like protein 1
AARA21_004133	1561.74	0.897556	1.86291	0.327822	0.00268816	0.00704739	1	0		U6 snRNA-associated Sm-like protein LSm3
AARA21_007370	608.441	0.896762	1.86188	0.464245	0.0211777	0.0425373	0	0		gram-negative bacteria-binding protein 1
AARA21_008096	6324.99	0.895468	1.86021	0.149104	7.33815e-10	1.21207e-08	1	0		WASH complex subunit 5
AARA21_007131	18676	0.894087	1.85843	0.116682	8.51693e-15	6.52305e-13	1	0		thioredoxin, mitochondrial
AARA21_002560	1458.79	0.894077	1.85842	0.305826	0.00157769	0.00444204	1	0		proline-rich extensin-like protein EPR1, transcript variant X5
AARA21_011550	1864.89	0.893779	1.85804	0.163931	2.72249e-08	2.81367e-07	1	0		39S ribosomal protein L34, mitochondrial
AARA21_006256	1051.38	0.893321	1.85745	0.254206	0.000217373	0.000771356	1	0		caspase-like, transcript variant X3
AARA21_005940	28793.1	0.892469	1.85635	0.516625	0.0327402	0.0617243	0	0		mucin-2-like
AARA21_006630	28.6769	0.892171	1.85597	0.770662	0.067209	0.113563	0	0		odorant receptor 49b-like
AARA21_004751	1883.85	0.891971	1.85571	0.234873	6.85638e-05	0.000280089	1	0		ATP synthase mitochondrial F1 complex assembly factor 2
AARA21_000259	9261.8	0.89197	1.85571	0.312223	0.00195461	0.00534652	1	0		thyroglobulin-like
AARA21_002305	77.3841	0.891757	1.85543	0.62487	0.0524379	0.0923766	0	0		RNA polymerase II degradation factor 1, transcript variant X2
AARA21_013965	892.379	0.891382	1.85495	0.27443	0.000532377	0.00170358	1	0		potassium voltage-gated channel protein Shaw-like, transcript variant X3
AARA21_003026	549.863	0.890726	1.85411	0.601751	0.0498441	0.0885467	0	0		sodium channel protein Nach, transcript variant X2
AARA21_000596	928.355	0.890408	1.8537	0.24979	0.000170515	0.000623125	1	0		ribonuclease P protein subunit p25-like protein, transcript variant X4
AARA21_006522	17741.3	0.889803	1.85292	0.180722	4.16757e-07	3.07302e-06	1	0		unconventional myosin-IXa-like, transcript variant X15
AARA21_014666	21086.2	0.887589	1.85008	0.258898	0.000240087	0.000841157	1	0		protein I'm not dead yet-like
AARA21_003872	712.981	0.887561	1.85005	0.379325	0.00816037	0.0186091	0	0		keratin-associated protein 19-2-like
AARA21_014910	28047.6	0.887348	1.84977	0.271081	0.000502817	0.00162271	1	0		proton-coupled amino acid transporter-like protein CG1139, transcript variant X2
AARA21_007024	3183.04	0.88726	1.84966	0.424722	0.0154653	0.0325151	0	0		elongation of very long chain fatty acids protein AAEL008004-like
AARA21_007977	29454.4	0.886809	1.84908	0.133486	1.52746e-11	4.36752e-10	1	0		GTP-binding protein SAR1b
AARA21_010094	14614.9	0.88634	1.84848	0.209363	1.12326e-05	5.71716e-05	1	0		probable helicase with zinc finger domain
AARA21_005101	70676.7	0.885691	1.84765	0.327519	0.00283845	0.00738478	1	0		CUGBP Elav-like family member 2, transcript variant X5
AARA21_002279	7103.71	0.885516	1.84742	0.22867	4.49315e-05	0.00019342	1	0		protein takeout-like
AARA21_008102	954.235	0.885434	1.84732	0.168641	6.79576e-08	6.32256e-07	1	0		dolichol-phosphate mannosyltransferase subunit 3, transcript variant X1
AARA21_001440	13171.2	0.884213	1.84576	0.352615	0.00526997	0.012746	0	0		nuclear factor NF-kappa-B p110 subunit, transcript variant X2
AARA21_011313	10380.3	0.884139	1.84566	0.482953	0.0271497	0.0525237	0	0		glycine-rich RNA-binding protein-like
AARA21_014695	19127.4	0.883156	1.84441	0.264062	0.000334329	0.00113196	1	0		protein groucho, transcript variant X1
AARA21_013338	8723.41	0.882809	1.84396	0.384362	0.00946926	0.0211431	0	0		ND3
AARA21_000295	30513.1	0.882766	1.84391	0.464012	0.0235164	0.0465588	0	0		succinate dehydrogenase [ubiquinone] cytochrome b small subunit, mitochondrial
AARA21_002423	1836.86	0.882408	1.84345	0.297312	0.00143664	0.00409328	1	0		carcinine transporter
AARA21_007905	3145.37	0.882327	1.84335	0.378568	0.00797327	0.0182613	0	0		tyrosine-protein phosphatase non-receptor type 23, transcript variant X2
AARA21_006168	1037.9	0.882082	1.84303	0.265079	0.000409288	0.00135276	1	0		5-hydroxytryptamine receptor 1-like, transcript variant X5
AARA21_011795	1768.96	0.881485	1.84227	0.746598	0.0712758	0.119459	0	0		L-dopachrome tautomerase yellow-f-like
AARA21_011965	11271	0.881185	1.84189	0.446413	0.0202545	0.0409449	0	0		multidrug resistance protein homolog 49-like
AARA21_009417	126.495	0.880585	1.84112	0.716625	0.0682965	0.115158	0	0		mucin-5AC
AARA21_008377	2225.19	0.88016	1.84058	0.476692	0.0261952	0.050976	0	0		zinc carboxypeptidase-like
AARA21_000208	13.0365	0.879794	1.84011	0.680101	0.0603243	0.103728	0	0		general odorant-binding protein 56d-like
AARA21_013081	854.859	0.879541	1.83979	0.282917	0.000922211	0.00277245	1	0		SET domain-containing protein SmydA-8, transcript variant X4
AARA21_001644	47346.9	0.877319	1.83696	0.219846	3.24619e-05	0.000145182	1	0		casein kinase II subunit alpha
AARA21_007196	382752	0.87701	1.83657	0.546819	0.0421577	0.0767681	0	0		glyceraldehyde-3-phosphate dehydrogenase 2
AARA21_005650	75290.1	0.876132	1.83545	0.350408	0.00571745	0.0137021	0	0		protein kinase C, brain isozyme-like, transcript variant X3
AARA21_002905	37422.1	0.875772	1.83499	0.667875	0.0631453	0.107868	0	0		fatty acid synthase
AARA21_015499	20600	0.875362	1.83447	0.194461	3.36196e-06	1.95828e-05	1	0		monocarboxylate transporter 14-like, transcript variant X5
AARA21_004245	19775.9	0.874813	1.83377	0.237937	0.000109845	0.000424436	1	0		10 kDa heat shock protein, mitochondrial
AARA21_004797	25744.7	0.873736	1.8324	0.169144	1.16329e-07	1.0012e-06	1	0		extracellular serine/threonine protein CG31145, transcript variant X5
AARA21_010808	3651.63	0.872712	1.8311	0.271116	0.000620288	0.0019495	1	0		ralA-binding protein 1
AARA21_001064	15183.8	0.872508	1.83084	0.153656	6.86491e-09	8.51824e-08	1	0		verprolin-like, transcript variant X8
AARA21_001273	260.782	0.872473	1.8308	0.262247	0.000411038	0.0013582	1	0		probable tubulin polyglutamylase ttll-15
AARA21_003062	2369.3	0.872416	1.83073	0.211467	1.88924e-05	9.02574e-05	1	0		protein bowel
AARA21_000297	6015.2	0.872246	1.83051	0.297523	0.0015919	0.00447617	1	0		iron-sulfur cluster assembly 2 homolog, mitochondrial
AARA21_008882	8167.65	0.872072	1.83029	0.23539	0.000103744	0.000403896	1	0		probable alpha-aspartyl dipeptidase
AARA21_004080	827.056	0.869832	1.82745	0.252122	0.000304434	0.00104041	1	0		serine/threonine-protein kinase 32A
AARA21_003984	51321.4	0.869753	1.82735	0.203065	9.2527e-06	4.78707e-05	1	0		lissencephaly-1 homolog, transcript variant X3
AARA21_007700	11419.9	0.868523	1.82579	0.241997	0.000149698	0.000558148	1	0		tyrosine-protein kinase hopscotch, transcript variant X1
AARA21_015092	70812.6	0.867605	1.82463	0.453182	0.0237416	0.0469469	0	0		cecropin-A
AARA21_001002	721.155	0.86736	1.82432	0.294142	0.00151454	0.0042877	1	0		RYamide receptor, transcript variant X4
AARA21_005973	7129.68	0.867191	1.82411	0.145987	1.68098e-09	2.51502e-08	1	0		F-box only protein 32
AARA21_002364	261.269	0.86677	1.82358	0.554931	0.0445623	0.0804749	0	0		cell wall integrity and stress response component 1-like
AARA21_000749	2140.49	0.866334	1.82302	0.45561	0.0244155	0.0480873	0	0		ATP-binding cassette sub-family A member 3-like
AARA21_000416	923.047	0.864155	1.82027	0.253466	0.000311166	0.00106117	1	0		insulin gene enhancer protein isl-1, transcript variant X2
AARA21_005929	28253.8	0.863274	1.81916	0.380157	0.0105574	0.0232327	0	0		acylphosphatase-2
AARA21_001379	4389.8	0.863031	1.81886	0.1957	5.44621e-06	2.97817e-05	1	0		solute carrier family 35 member F5, transcript variant X2
AARA21_014824	17704.3	0.862973	1.81878	0.244326	0.000185637	0.00066926	1	0		actin-binding Rho-activating protein-like, transcript variant X4
AARA21_007940	3292.78	0.862368	1.81802	0.13851	2.32412e-10	4.47671e-09	1	0		39S ribosomal protein L47, mitochondrial
AARA21_002984	8378.51	0.862271	1.8179	0.418909	0.0173987	0.0360149	0	0		cytoskeleton protein RodZ-like
AARA21_010957	6780.11	0.862132	1.81772	0.207422	1.52129e-05	7.48051e-05	1	0		signal peptidase complex subunit 3
AARA21_000752	6753.23	0.861755	1.81725	0.256533	0.000345159	0.00116597	1	0		mucin-5AC, transcript variant X4
AARA21_008115	1420.33	0.861607	1.81706	0.336245	0.0046197	0.0113829	0	0		cadherin-86C, transcript variant X1
AARA21_001820	1537.78	0.860929	1.81621	0.227758	7.76337e-05	0.000312356	1	0		protein windbeutel
AARA21_013429	180.209	0.860779	1.81602	0.281724	0.000995949	0.00296778	1	0		cadherin EGF LAG seven-pass G-type receptor 1
AARA21_012800	14387.7	0.860567	1.81575	0.188413	2.52734e-06	1.51817e-05	1	0		syntaxin-1A, transcript variant X11
AARA21_011393	9919.56	0.860024	1.81507	0.37725	0.0102383	0.0226297	0	0		BRCA1-associated protein-like
AARA21_008023	5358.22	0.859079	1.81388	0.265527	0.000631942	0.00198177	1	0		zinc finger protein 593 homolog
AARA21_008745	4.13085	0.858801	1.81353	0.980585	0.0761175	0.126212	0	0		large subunit ribosomal RNA
AARA21_015290	1155.78	0.858134	1.81269	0.363365	0.00828802	0.0188647	0	0		extracellular serine/threonine protein kinase four-jointed
AARA21_001247	1657.41	0.857977	1.81249	0.265984	0.000607964	0.00191404	1	0		distal membrane-arm assembly complex protein 2
AARA21_006722	324.546	0.857607	1.81203	0.349223	0.00604742	0.0143883	0	0		BTB/POZ domain-containing protein kctd15, transcript variant X1
AARA21_005813	2906.19	0.857522	1.81192	0.449153	0.0241106	0.0475597	0	0		SET and MYND domain-containing protein 4-like
AARA21_013271	6735.02	0.857432	1.81181	0.355914	0.00736696	0.0170548	0	0		UDP-glycosyltransferase UGT5-like
AARA21_012647	12223.6	0.85711	1.81141	0.254903	0.000383699	0.00127672	1	0		death-associated protein kinase related-like, transcript variant X2
AARA21_012528	7483.19	0.856968	1.81123	0.19326	4.68966e-06	2.60881e-05	1	0		probable Dol-P-Man:Man(7)GlcNAc(2)-PP-Dol alpha-1,6-mannosyltransferase
AARA21_012147	7.9445	0.856746	1.81095	0.703892	0.071462	0.119696	0	0		small nucleolar RNA snR61/Z1/Z11
AARA21_003791	6071.84	0.854191	1.80775	0.358856	0.00801071	0.0183285	0	0		tubulin beta-3 chain
AARA21_003604	18358.5	0.853638	1.80705	0.622504	0.0611958	0.104987	0	0		histone-lysine N-methyltransferase 2D-like
AARA21_006011	2196.58	0.852894	1.80612	0.253238	0.000365343	0.00122355	1	0		calpain-B-like
AARA21_010166	1629.85	0.852477	1.8056	0.216039	4.26561e-05	0.000184924	1	0		small VCP/p97-interacting protein
AARA21_014712	1142.38	0.851266	1.80408	0.288345	0.00157833	0.00444286	1	0		sialidase, transcript variant X1
AARA21_013028	3462.96	0.850736	1.80342	0.424905	0.0199891	0.0404784	0	0		aldo-keto reductase family 1 member B1-like
AARA21_002298	40.2179	0.850614	1.80327	0.459953	0.0264565	0.0513989	0	0		5.8S ribosomal RNA
AARA21_015021	3359.32	0.849975	1.80247	0.235412	0.00014502	0.000543065	1	0		phosphopantothenoylcysteine decarboxylase
AARA21_010272	3812.31	0.84965	1.80206	0.206892	1.88975e-05	9.02574e-05	1	0		histidine triad nucleotide-binding protein 1
AARA21_013766	209.822	0.849019	1.80128	0.304818	0.00257994	0.00679272	1	0		retinal homeobox protein Rx, transcript variant X2
AARA21_006056	11298	0.847581	1.79948	0.290881	0.00175546	0.00488168	1	0		titin-like, transcript variant X1
AARA21_005295	8615.29	0.846899	1.79863	0.3589	0.00864374	0.0195224	0	0		U3 small nucleolar RNA-associated protein 18 homolog
AARA21_009407	4778.27	0.846769	1.79847	0.203599	1.75059e-05	8.46164e-05	1	0		mucin-19, transcript variant X5
AARA21_003929	5.30124	0.84666	1.79833	1.01779	0.0891343	0.144372	0	0		REST corepressor 2, transcript variant X2
AARA21_005054	1264.76	0.84633	1.79792	0.15748	3.92388e-08	3.86632e-07	1	0		bolA-like protein DDB_G0274169
AARA21_001707	11537.5	0.84526	1.79659	0.314344	0.00348348	0.00884585	1	0		vegetative cell wall protein gp1-like, transcript variant X1
AARA21_014471	4936.68	0.844507	1.79565	0.183343	2.2618e-06	1.37927e-05	1	0		phosphatidylserine decarboxylase proenzyme, mitochondrial, transcript variant X1
AARA21_012447	183.312	0.844188	1.79525	0.319097	0.00375355	0.00944961	1	0		probable E3 ubiquitin-protein ligase IRF2BPL
AARA21_007210	913.896	0.84372	1.79467	0.235358	0.000168143	0.00061568	1	0		ATP-binding cassette sub-family G member 5
AARA21_003725	3.18306	0.843452	1.79434	1.18007	0.0652423	0.110748	0	0		tRNA-His
AARA21_003036	115.302	0.842959	1.79372	0.256494	0.000538442	0.00171999	1	0		zinc finger MYND domain-containing protein 10 homolog
AARA21_010449	52.4697	0.841487	1.7919	0.716202	0.0787699	0.129923	0	0		ornithine decarboxylase 2-like
AARA21_005767	3293.47	0.841227	1.79157	0.17336	6.41387e-07	4.48274e-06	1	0		IST1 homolog
AARA21_010505	2167.85	0.841153	1.79148	0.129363	4.06289e-11	9.91976e-10	1	0		mitochondrial transcription rescue factor 1
AARA21_013884	35683.9	0.839176	1.78903	0.200594	1.50017e-05	7.39564e-05	1	0		histone lysine acetyltransferase CREBBP, transcript variant X4
AARA21_012001	7395.13	0.838876	1.78866	0.174543	7.88782e-07	5.38422e-06	1	0		serine/threonine-protein kinase D3, transcript variant X2
AARA21_014504	59.8495	0.838564	1.78827	0.743312	0.0841681	0.137505	0	0		gustatory receptor for sugar taste 64a-like
AARA21_002985	119.395	0.838267	1.7879	0.235479	0.000203077	0.000725026	1	0		transcription factor 15-like
AARA21_014897	5985.38	0.838191	1.78781	0.228338	0.000124148	0.000475138	1	0		diuretic hormone class 2, transcript variant X1
AARA21_010418	782.999	0.837946	1.7875	0.608839	0.0623421	0.10667	0	0		lipase member H-A-like, transcript variant X1
AARA21_010997	18416.1	0.83752	1.78698	0.140736	1.42168e-09	2.17254e-08	1	0		striatin-3, transcript variant X5
AARA21_002534	2339.57	0.836651	1.7859	0.186089	3.50364e-06	2.02886e-05	1	0		AT-rich interactive domain-containing protein 1B, transcript variant X1
AARA21_006393	5521.98	0.836466	1.78567	0.407302	0.0182511	0.037509	0	0		gamma-glutamyl hydrolase-like
AARA21_001718	26290.9	0.836293	1.78546	0.26723	0.000889243	0.00268968	1	0		protein SDA1 homolog
AARA21_013380	17585.5	0.833796	1.78237	0.379066	0.0130507	0.0280012	0	0		apolipoprotein D-like, transcript variant X2
AARA21_002394	15184.8	0.832959	1.78134	0.27074	0.00106185	0.00314304	1	0		actin-3, muscle-specific-like
AARA21_002075	35638.1	0.830744	1.7786	0.833514	0.089912	0.145394	0	0		actin, indirect flight muscle-like, transcript variant X1
AARA21_010141	2533.3	0.830614	1.77844	0.322861	0.00496767	0.0121082	0	0		pre-mRNA-splicing factor CWC25 homolog
AARA21_004444	1749.12	0.830395	1.77817	0.229241	0.000151681	0.000564559	1	0		serine/arginine repetitive matrix protein 1, transcript variant X1
AARA21_008467	1634.48	0.829393	1.77694	0.251602	0.000499151	0.0016129	1	0		probable serine hydrolase
AARA21_008347	6804.03	0.828755	1.77615	0.242482	0.000366811	0.00122814	1	0		glutathione hydrolase 1 proenzyme-like
AARA21_015314	13492.5	0.828282	1.77557	0.215185	6.21779e-05	0.000257331	1	0		carbonic anhydrase 7
AARA21_005530	2748.46	0.828018	1.77524	0.413057	0.0206354	0.0415908	0	0		cysteine sulfinic acid decarboxylase
AARA21_001812	12371.4	0.82795	1.77516	0.243885	0.000355939	0.00119736	1	0		myb-like protein X, transcript variant X2
AARA21_001236	3206.98	0.827933	1.77514	0.156672	7.05649e-08	6.52269e-07	1	0		SLIT and NTRK-like protein 4
AARA21_012430	1492.95	0.826794	1.77374	0.33166	0.00614533	0.0145776	0	0		thyroid transcription factor 1-like
AARA21_004738	12979.8	0.826539	1.77343	0.282823	0.00174024	0.00484248	1	0		mannosyl-oligosaccharide alpha-1,2-mannosidase IA
AARA21_014493	6395.08	0.825929	1.77268	0.391824	0.0166627	0.034733	0	0		transcriptional regulator ovo-like
AARA21_013317	255.252	0.825875	1.77261	0.531409	0.048103	0.0859521	0	0		troponin C, isoallergen Bla g 6.0101-like
AARA21_006053	2819.57	0.825844	1.77257	0.217391	7.64295e-05	0.000308281	1	0		translation initiation factor IF-3
AARA21_004282	2163.94	0.825351	1.77197	0.296469	0.00268955	0.00704958	1	0		translation initiation factor IF-2-like
AARA21_002936	150.089	0.824958	1.77148	0.458461	0.031923	0.0602895	0	0		homeotic protein labial, transcript variant X2
AARA21_012761	139.123	0.824073	1.7704	0.397905	0.0177746	0.036675	0	0		echinoderm microtubule-associated protein-like CG42247, transcript variant X1
AARA21_005897	3074.41	0.823705	1.76995	0.358044	0.0100894	0.0223481	0	0		voltage-dependent calcium channel type A subunit alpha-1, transcript variant X10
AARA21_013005	664.233	0.822686	1.7687	0.608328	0.0689016	0.116042	0	0		serine-rich adhesin for platelets-like
AARA21_009048	30386.2	0.821604	1.76737	0.217636	8.4802e-05	0.000337608	1	0		nodal modulator 1
AARA21_002685	47996.7	0.821389	1.76711	0.147168	1.6084e-08	1.77948e-07	1	0		death-associated inhibitor of apoptosis 1
AARA21_007072	26776.6	0.820772	1.76635	0.130502	1.74349e-10	3.55523e-09	1	0		segmentation protein cap'n'collar, transcript variant X1
AARA21_000030	89.3514	0.82074	1.76631	0.391923	0.0169059	0.0351646	0	0		mucin-2, transcript variant X1
AARA21_000258	1772.23	0.820417	1.76592	0.280071	0.00180033	0.00498061	1	0		protein fork head
AARA21_013121	14091.8	0.819999	1.7654	0.214866	7.20482e-05	0.000292813	1	0		beta-TrCP, transcript variant X4
AARA21_004986	2460.51	0.819649	1.76498	0.256067	0.000721075	0.00222923	1	0		neuroligin-3, transcript variant X1
AARA21_004719	39.225	0.819363	1.76463	0.454112	0.0314363	0.0594665	0	0		outer dynein arm-docking complex subunit 3
AARA21_014163	18519.8	0.818434	1.76349	0.278854	0.00172168	0.00479914	1	0		proteoglycan Cow
AARA21_009340	672.584	0.818331	1.76337	0.288972	0.00233548	0.00624494	1	0		G protein-activated inward rectifier potassium channel 3-like
AARA21_010507	790.981	0.817681	1.76257	0.21301	6.35057e-05	0.000261816	1	0		two pore potassium channel protein sup-9
AARA21_011025	2110.96	0.817451	1.76229	0.198868	2.14337e-05	0.000100579	1	0		nucleoside diphosphate-linked moiety X motif 8, transcript variant X8
AARA21_000092	31198.4	0.817192	1.76197	0.308563	0.00412679	0.0102846	0	0		nucleolar protein 56
AARA21_015462	1919.46	0.817047	1.7618	0.243565	0.000412329	0.00136211	1	0		E3 ubiquitin-protein ligase TRIM9, transcript variant X2
AARA21_002508	3712.85	0.817016	1.76176	0.207383	4.3772e-05	0.000188998	1	0		cAMP-dependent protein kinase catalytic subunit PRKX
AARA21_002769	179141	0.816737	1.76142	0.216407	8.61545e-05	0.000342145	1	0		60S ribosomal protein L9
AARA21_006277	291.578	0.815727	1.76018	0.355113	0.0109914	0.0240838	0	0		T-box transcription factor T-like
AARA21_008815	4000.17	0.815498	1.75991	0.426607	0.0260681	0.0507594	0	0		putative polypeptide N-acetylgalactosaminyltransferase 9
AARA21_004113	89.2207	0.814976	1.75927	0.333722	0.00667084	0.0156745	0	0		protein disconnected-like
AARA21_001741	8302.84	0.814761	1.75901	0.198842	2.24228e-05	0.000104686	1	0		myotubularin-related protein 8, transcript variant X2
AARA21_004123	1637.39	0.814621	1.75884	0.221958	0.000108593	0.000420231	1	0		protein sidekick-2-like, transcript variant X1
AARA21_006813	38851	0.814456	1.75864	0.196113	1.77685e-05	8.57566e-05	1	0		synaptosomal-associated protein 25, transcript variant X3
AARA21_013943	2855.67	0.814281	1.75842	0.267902	0.00122662	0.00356758	1	0		tax1-binding protein 3 homolog
AARA21_013722	297.156	0.813416	1.75737	0.51718	0.0493897	0.0878791	0	0		protein tipE
AARA21_003252	14549.5	0.812133	1.75581	0.151371	4.10327e-08	4.02108e-07	1	0		high affinity copper uptake protein 1, transcript variant X5
AARA21_000382	15328.7	0.811824	1.75543	0.154667	8.3857e-08	7.58249e-07	1	0		pyridoxal kinase
AARA21_002602	154.978	0.811813	1.75542	0.353291	0.0101212	0.0224032	0	0		extensin
AARA21_008307	6762.05	0.810833	1.75422	0.179174	3.27161e-06	1.91431e-05	1	0		fizzy-related protein homolog, transcript variant X3
AARA21_013035	4444.3	0.810732	1.7541	0.341714	0.00879729	0.0198182	0	0		sphingolipid delta(4)-desaturase DES1-like, transcript variant X1
AARA21_003438	221.251	0.810679	1.75404	0.246964	0.000508317	0.001638	1	0		solute carrier organic anion transporter family member 4A1
AARA21_008045	9808.01	0.809809	1.75298	0.290067	0.00270116	0.00707425	1	0		protein ABHD18
AARA21_015372	11966.2	0.809346	1.75242	0.190605	1.32988e-05	6.64267e-05	1	0		beta-1,4-mannosyltransferase egh, transcript variant X1
AARA21_009517	10495.1	0.80922	1.75226	0.159133	2.01861e-07	1.6315e-06	1	0		protein ultraspiracle homolog, transcript variant X2
AARA21_005127	1086.65	0.808261	1.7511	0.180889	3.77449e-06	2.15467e-05	1	0		proton-associated sugar transporter A-like
AARA21_015008	4509.38	0.808031	1.75082	0.196054	1.78698e-05	8.62132e-05	1	0		DNA-directed RNA polymerases I, II, and III subunit RPABC4
AARA21_009158	700.862	0.806543	1.74902	0.597456	0.0702671	0.118001	0	0		ATP-binding cassette sub-family A member 3-like
AARA21_004887	269.152	0.804777	1.74688	0.403403	0.0219167	0.0437892	0	0		retinaldehyde-binding protein 1-like
AARA21_008971	12.3936	0.804604	1.74667	0.775973	0.0867741	0.140975	0	0		potassium/sodium hyperpolarization-activated cyclic nucleotide-gated channel 2-like, transcript variant X2
AARA21_004173	3167.56	0.804154	1.74612	0.28251	0.00230224	0.00616759	1	0		SCY1-like protein 2, transcript variant X7
AARA21_011081	102.796	0.803856	1.74576	0.506299	0.0482683	0.0861996	0	0		mucin-5AC-like
AARA21_000406	14.4175	0.801594	1.74303	0.651913	0.0771225	0.127533	0	0		5.8S ribosomal RNA
AARA21_012310	42.0246	0.801205	1.74256	0.532455	0.0557449	0.0972305	0	0		probable serine/threonine-protein kinase MARK-A, transcript variant X1
AARA21_012738	3178.45	0.800336	1.74151	0.156002	2.07852e-07	1.67571e-06	1	0		28S ribosomal protein S33, mitochondrial
AARA21_003267	4751.17	0.799824	1.74089	0.447469	0.034616	0.0647766	0	0		alkyldihydroxyacetonephosphate synthase, transcript variant X4
AARA21_001794	60549.8	0.799796	1.74085	0.192643	1.81495e-05	8.73987e-05	1	0		sodium-dependent phosphate transporter 1-A, transcript variant X2
AARA21_001665	1288.2	0.797567	1.73817	0.163447	5.84174e-07	4.13211e-06	1	0		CTTNBP2 N-terminal-like protein, transcript variant X2
AARA21_004051	1974	0.796049	1.73634	0.22228	0.000183282	0.000663001	1	0		glycosylphosphatidylinositol anchor attachment 1 protein
AARA21_011180	339.212	0.795475	1.73565	0.530907	0.0592781	0.102202	0	0		F-box/LRR-repeat protein fbxl-1-like
AARA21_007637	4748.62	0.795374	1.73553	0.143935	1.81683e-08	1.97943e-07	1	0		5-hydroxytryptamine receptor 1-like, transcript variant X2
AARA21_006483	5654.24	0.795312	1.73545	0.188957	1.38355e-05	6.86949e-05	1	0		protein-L-isoaspartate(D-aspartate) O-methyltransferase, transcript variant X1
AARA21_012478	17373	0.795015	1.7351	0.250765	0.000820391	0.00249845	1	0		serine-rich adhesin for platelets, transcript variant X1
AARA21_010098	464.457	0.794611	1.73461	0.389592	0.021096	0.0424129	0	0		lysine--tRNA ligase-like, transcript variant X1
AARA21_009984	3893.78	0.794187	1.7341	0.286611	0.0029382	0.00760986	1	0		UDP-glucosyltransferase 2-like
AARA21_004297	2451.28	0.793344	1.73309	0.229203	0.000290132	0.00099763	1	0		cytosolic Fe-S cluster assembly factor NUBP2 homolog
AARA21_012544	222070	0.792414	1.73197	0.197482	3.35408e-05	0.000149229	1	0		40S ribosomal protein S23
AARA21_004002	6645.88	0.79225	1.73177	0.514711	0.0545788	0.0955984	0	0		lipase member H-A-like
AARA21_012422	32226.9	0.791857	1.7313	0.297075	0.0040654	0.0101513	0	0		triosephosphate isomerase
AARA21_012387	25623.8	0.791821	1.73126	0.206708	7.08649e-05	0.000288276	1	0		putative mediator of RNA polymerase II transcription subunit 26, transcript variant X1
AARA21_006126	3175.43	0.791529	1.73091	0.189885	1.68378e-05	8.16322e-05	1	0		zinc finger protein 14-like, transcript variant X1
AARA21_003205	326.194	0.79074	1.72996	0.436498	0.0329841	0.0620931	0	0		inactive ubiquitin carboxyl-terminal hydrolase MINDY-4B, transcript variant X2
AARA21_000292	5168.04	0.78979	1.72882	0.211184	0.000101354	0.000395548	1	0		galactosylgalactosylxylosylprotein 3-beta-glucuronosyltransferase P, transcript variant X2
AARA21_011485	223467	0.788699	1.72752	0.436042	0.033973	0.0637124	0	0		cytochrome c oxidase subunit NDUFA4
AARA21_003173	225.676	0.78789	1.72655	0.480858	0.0453053	0.0815876	0	0		trypsin 3A1-like
AARA21_003379	10427.5	0.787045	1.72554	0.19084	2.08107e-05	9.81205e-05	1	0		histone-lysine N-methyltransferase, H3 lysine-79 specific, transcript variant X9
AARA21_007773	13059.8	0.786795	1.72524	0.150057	8.98091e-08	8.02481e-07	1	0		E3 ubiquitin-protein ligase RNF13, transcript variant X6
AARA21_001531	6898.43	0.786568	1.72497	0.213886	0.000130514	0.000495962	1	0		extracellular sulfatase SULF-1 homolog, transcript variant X2
AARA21_005394	126.16	0.785777	1.72402	0.497388	0.0517492	0.0913885	0	0		protein escargot
AARA21_010858	6148.52	0.785526	1.72372	0.571962	0.0768408	0.127116	0	0		spermine oxidase-like
AARA21_015324	6269.95	0.785455	1.72364	0.263785	0.00156716	0.0044182	1	0		thioredoxin domain-containing protein 17
AARA21_006026	231.364	0.785447	1.72363	0.441654	0.035845	0.0667368	0	0		zonadhesin-like
AARA21_007359	26999.5	0.784697	1.72273	0.129443	7.22077e-10	1.19729e-08	1	0		MAP/microtubule affinity-regulating kinase 3, transcript variant X4
AARA21_014165	9506.31	0.784205	1.72214	0.233412	0.000428856	0.00140911	1	0		serine/threonine-protein kinase/endoribonuclease IRE1
AARA21_006169	173793	0.783814	1.72168	0.211016	8.55505e-05	0.00034021	1	0		60S ribosomal protein L11
AARA21_011823	54524.2	0.783637	1.72147	0.265514	0.00173048	0.00482054	1	0		serine protease inhibitor Kazal-type 1-like
AARA21_002401	53620.2	0.782086	1.71962	0.258687	0.00102146	0.00303255	1	0		protoheme IX farnesyltransferase, mitochondrial
AARA21_014804	24890.1	0.781638	1.71908	0.139813	1.29805e-08	1.46537e-07	1	0		lysosomal aspartic protease
AARA21_009018	1437.3	0.781047	1.71838	0.514734	0.0588059	0.101551	0	0		sulfate transporter-like
AARA21_003865	3788.79	0.780451	1.71767	0.13485	4.19838e-09	5.55767e-08	1	0		neuronal membrane glycoprotein M6-a, transcript variant X1
AARA21_013159	1083	0.780219	1.71739	0.299181	0.00491909	0.0120057	0	0		kinesin-like protein CG14535
AARA21_007356	360.57	0.780076	1.71722	0.285478	0.00339107	0.00863676	1	0		homeobox protein invected
AARA21_004186	5847.45	0.77895	1.71588	0.206396	8.97997e-05	0.000354869	1	0		multiple inositol polyphosphate phosphatase 1, transcript variant X1
AARA21_001684	3010.06	0.778746	1.71564	0.160344	5.60914e-07	3.99228e-06	1	0		homeobox protein B-H2, transcript variant X1
AARA21_001370	30141.1	0.778588	1.71545	0.245076	0.000769333	0.00236141	1	0		dual specificity protein phosphatase 3, transcript variant X4
AARA21_010246	1672.36	0.778417	1.71525	0.197155	4.56734e-05	0.000196352	1	0		membrane-bound alkaline phosphatase-like
AARA21_010375	18332.1	0.778092	1.71486	0.196506	4.25472e-05	0.000184514	1	0		anion exchange protein 2-like, transcript variant X1
AARA21_004249	3498.35	0.777491	1.71415	0.215155	0.000163939	0.000602978	1	0		transient receptor potential cation channel protein painless
AARA21_006172	6606.82	0.777405	1.71404	0.50781	0.057771	0.100038	0	0		basic proline-rich protein-like
AARA21_004891	17277	0.77733	1.71396	0.208132	0.000106233	0.000412205	1	0		protein spinster, transcript variant X2
AARA21_012903	80.7594	0.777204	1.71381	0.340556	0.0112313	0.0245519	0	0		pickpocket protein 28
AARA21_009428	1424.71	0.775953	1.71232	0.236309	0.000631562	0.00198106	1	0		frizzled-4
AARA21_015184	9334.09	0.775843	1.71219	0.207931	0.000105867	0.000411041	1	0		mucin-17-like, transcript variant X2
AARA21_000070	3.81511	0.775841	1.71219	0.854498	0.0974423	0.155808	0	0		5.8S ribosomal RNA
AARA21_005129	94014.9	0.774503	1.7106	0.402407	0.0273999	0.0529318	0	0		malate dehydrogenase, mitochondrial
AARA21_009423	1948.88	0.773056	1.70889	0.466659	0.046239	0.0830135	0	0		serine protease 27-like
AARA21_005621	9573.09	0.772318	1.70801	0.177712	7.94292e-06	4.17831e-05	1	0		sprouty-related, EVH1 domain-containing protein 1, transcript variant X3
AARA21_002005	990.445	0.771287	1.70679	0.227822	0.000382802	0.00127472	1	0		dolichol kinase, transcript variant X1
AARA21_010025	807.282	0.769915	1.70517	0.225255	0.000349578	0.00117903	1	0		paired box protein Pax-6-like, transcript variant X1
AARA21_004975	8070.1	0.769734	1.70496	0.18463	1.6741e-05	8.12243e-05	1	0		mitochondrial thiamine pyrophosphate carrier-like, transcript variant X2
AARA21_006438	3503.61	0.767895	1.70278	0.241902	0.000838489	0.00254875	1	0		ras-related protein Rab-8A, transcript variant X6
AARA21_003747	926.281	0.767503	1.70232	0.263939	0.00200633	0.00546706	1	0		short-chain dehydrogenase/reductase family 16C member 6-like
AARA21_015248	615.344	0.766342	1.70095	0.347762	0.0146302	0.0309514	0	0		prostaglandin E2 receptor EP4 subtype
AARA21_012638	2725.42	0.765772	1.70028	0.184798	2.02312e-05	9.58802e-05	1	0		2-(3-amino-3-carboxypropyl)histidine synthase subunit 1
AARA21_011805	1441.39	0.76571	1.70021	0.361847	0.0178259	0.0367573	0	0		ND4L
AARA21_014230	8286.73	0.765586	1.70006	0.561262	0.0759764	0.126075	0	0		cysteine dioxygenase type 1
AARA21_005397	1566.36	0.764664	1.69897	0.373057	0.0203694	0.0411255	0	0		proline-rich protein 36-like
AARA21_010227	2433.98	0.764415	1.69868	0.366719	0.0194202	0.0394702	0	0		ND6
AARA21_007833	377.937	0.763544	1.69766	0.290393	0.00449942	0.0111206	0	0		arrestin domain-containing protein 3-like
AARA21_012126	18896.9	0.762906	1.69691	0.326535	0.0105143	0.0231499	0	0		NADH dehydrogenase [ubiquinone] iron-sulfur protein 4, mitochondrial
AARA21_006528	21835	0.762518	1.69645	0.148267	1.59832e-07	1.32425e-06	1	0		chloride intracellular channel exc-4, transcript variant X8
AARA21_004151	17826.5	0.762276	1.69616	0.431533	0.0386659	0.0713077	0	0		trimeric intracellular cation channel type 1B.1, transcript variant X2
AARA21_000176	12.103	0.76138	1.69511	0.620912	0.0849045	0.138515	0	0		tektin-2
AARA21_009369	7515.82	0.761364	1.69509	0.250597	0.00133772	0.0038448	1	0		serine/threonine kinase SAD-1, transcript variant X4
AARA21_009108	1523.98	0.761196	1.6949	0.501123	0.0607839	0.104392	0	0		chymotrypsin-2-like
AARA21_012357	4242.6	0.761165	1.69486	0.40629	0.0298753	0.0570165	0	0		peroxidase-like
AARA21_006134	580.221	0.761124	1.69481	0.215525	0.000231724	0.00081598	1	0		cartilage-associated protein-like, transcript variant X2
AARA21_011663	49.0051	0.759801	1.69326	0.388096	0.0253023	0.0495682	0	0		zinc finger protein 397-like, transcript variant X1
AARA21_005580	5216.05	0.759218	1.69257	0.221044	0.000301689	0.00103213	1	0		proteasome maturation protein
AARA21_004037	140.13	0.75908	1.69241	0.407086	0.0304808	0.0579829	0	0		annulin-like
AARA21_015607	10499.6	0.758463	1.69169	0.228047	0.000449238	0.00146747	1	0		cyclin-Y-like protein 1, transcript variant X5
AARA21_001864	38261.5	0.757957	1.69109	0.270241	0.00281389	0.00733071	1	0		mucin-19-like, transcript variant X1
AARA21_005138	3169.26	0.757664	1.69075	0.273474	0.00306229	0.00789471	1	0		recombining binding protein suppressor of hairless
AARA21_013412	12958.1	0.757646	1.69073	0.229291	0.000545606	0.00173783	1	0		SRSF protein kinase 3, transcript variant X3
AARA21_006576	7082.44	0.757006	1.68998	0.176699	1.15928e-05	5.87959e-05	1	0		kazrin, transcript variant X2
AARA21_013312	3.518	0.756806	1.68975	1.07343	0.0745589	0.124059	0	0		cysteine-rich venom protein 6-like
AARA21_015121	1701.37	0.756558	1.68945	0.271656	0.00300888	0.00777633	1	0		arrestin domain-containing protein 3-like
AARA21_012494	7741.83	0.756114	1.68894	0.411431	0.0336325	0.0631566	0	0		cell death abnormality protein 1-like
AARA21_006433	14322.5	0.755692	1.68844	0.171222	5.62148e-06	3.0636e-05	1	0		thyroid receptor-interacting protein 11
AARA21_006023	122971	0.755565	1.68829	0.135514	1.4663e-08	1.63208e-07	1	0		ferritin subunit
AARA21_008948	3973.09	0.75529	1.68797	0.291043	0.00484653	0.0118556	0	0		cyclic AMP response element-binding protein A, transcript variant X2
AARA21_014201	793.306	0.755115	1.68777	0.306658	0.00782086	0.0179378	0	0		oxidative stress-induced growth inhibitor 2-like
AARA21_009837	24446.7	0.753705	1.68612	0.230224	0.000584292	0.00184765	1	0		polyadenylate-binding protein-interacting protein 1-like, transcript variant X2
AARA21_009997	13460.5	0.753427	1.68579	0.170428	6.53513e-06	3.50511e-05	1	0		protein similar, transcript variant X1
AARA21_008472	359.638	0.75314	1.68546	0.47304	0.0534328	0.0938978	0	0		unconventional myosin-Ia, transcript variant X1
AARA21_012955	1197.64	0.752967	1.68525	0.236829	0.00084378	0.00256362	1	0		protein Teyrha-meyrha, transcript variant X5
AARA21_011195	2890.9	0.75294	1.68522	0.153897	5.79308e-07	4.10234e-06	1	0		glycerol-3-phosphate phosphatase-like
AARA21_014729	5705.14	0.752928	1.68521	0.316859	0.00915698	0.0205266	0	0		acetyl-CoA acetyltransferase, cytosolic
AARA21_009183	14435	0.751008	1.68297	0.281053	0.00420865	0.0104481	0	0		protein D2-like
AARA21_008425	14480.1	0.750968	1.68292	0.253232	0.00181333	0.00501121	1	0		protein stoned-B
AARA21_014748	7797.92	0.750311	1.68216	0.379194	0.0247393	0.0486356	0	0		unconventional myosin-VIIa-like, transcript variant X1
AARA21_007560	89045.4	0.749639	1.68137	0.398529	0.0312388	0.0591798	0	0		succinate dehydrogenase [ubiquinone] iron-sulfur subunit, mitochondrial
AARA21_015262	55253.7	0.749133	1.68078	0.145365	1.53117e-07	1.27189e-06	1	0		thioredoxin reductase 1, mitochondrial, transcript variant X4
AARA21_011347	6220.45	0.749101	1.68075	0.197324	9.62575e-05	0.000378297	1	0		probable multidrug resistance-associated protein lethal(2)03659, transcript variant X1
AARA21_009839	23058	0.747881	1.67932	0.29553	0.00638889	0.0150753	0	0		band 7 protein AGAP004871-like, transcript variant X1
AARA21_002168	268.571	0.747775	1.6792	0.367369	0.0223908	0.0445821	0	0		gamma-aminobutyric acid receptor alpha-like, transcript variant X1
AARA21_015672	163802	0.747472	1.67885	0.153409	6.61876e-07	4.61091e-06	1	0		60S ribosomal protein L10
AARA21_010005	16217.3	0.747052	1.67836	0.182323	2.47634e-05	0.000114	1	0		E3 ubiquitin-protein ligase ariadne-1, transcript variant X1
AARA21_011920	143.669	0.745592	1.67666	0.412687	0.0360073	0.0670001	0	0		E3 ISG15--protein ligase HERC5
AARA21_000380	9123.37	0.745178	1.67618	0.225303	0.000525519	0.00168541	1	0		putative RNA-binding protein Luc7-like 2, transcript variant X1
AARA21_008724	6270.65	0.744765	1.6757	0.154047	7.88515e-07	5.38422e-06	1	0		ribonuclease Oy
AARA21_001759	888.497	0.744445	1.67533	0.365858	0.0213014	0.0427139	0	0		leucine-rich melanocyte differentiation-associated protein-like
AARA21_003585	81.4309	0.744366	1.67524	0.467633	0.0565605	0.0983864	0	0		protein gooseberry
AARA21_004912	362.143	0.744196	1.67504	0.363091	0.0212956	0.0427139	0	0		putative potassium transport protein DDB_G0292412
AARA21_005579	173063	0.743977	1.67479	0.511458	0.0698823	0.117447	0	0		cytochrome b-c1 complex subunit Rieske, mitochondrial, transcript variant X2
AARA21_010684	9150.39	0.743246	1.67394	0.151757	5.84476e-07	4.13211e-06	1	0		neurexin-4, transcript variant X2
AARA21_014576	11236.3	0.743131	1.6738	0.0995002	5.01115e-14	3.13002e-12	1	0		BAG family molecular chaperone regulator 2, transcript variant X1
AARA21_010254	28714.2	0.742405	1.67296	0.139109	5.72165e-08	5.42124e-07	1	0		bax inhibitor 1
AARA21_014986	989.974	0.742382	1.67294	0.263851	0.00274526	0.00717224	1	0		transcription factor Sox-14-like
AARA21_006766	7316.56	0.742092	1.6726	0.292318	0.00607446	0.0144393	0	0		dopamine N-acetyltransferase-like, transcript variant X2
AARA21_007089	3072.35	0.741953	1.67244	0.177987	1.83574e-05	8.8268e-05	1	0		rho GTPase-activating protein conundrum, transcript variant X1
AARA21_015724	775.802	0.74188	1.67235	0.204049	0.00015725	0.000581585	1	0		ketimine reductase mu-crystallin
AARA21_011554	16192.7	0.741458	1.67186	0.247492	0.00159069	0.00447376	1	0		protein mothers against dpp, transcript variant X3
AARA21_009028	40396.2	0.740966	1.6713	0.201638	0.000125029	0.000477761	1	0		casein kinase II subunit beta, transcript variant X3
AARA21_001544	2688.11	0.740351	1.67058	0.252311	0.00198897	0.00542549	1	0		cGMP-dependent protein kinase, isozyme 1, transcript variant X1
AARA21_000689	629.394	0.740136	1.67033	0.288312	0.00554808	0.0133384	0	0		zinc finger protein 93-like
AARA21_008465	11552	0.739994	1.67017	0.243933	0.000908542	0.00273839	1	0		plexin-B
AARA21_000549	22.6456	0.739647	1.66977	0.642416	0.107361	0.168891	0	0		putative inner dynein arm light chain, axonemal
AARA21_009950	4653.76	0.739226	1.66928	0.286632	0.00563885	0.0135364	0	0		MAGUK p55 subfamily member 6, transcript variant X1
AARA21_005729	47651.6	0.738928	1.66894	0.46813	0.0574419	0.0996502	0	0		fumarate hydratase, mitochondrial-like, transcript variant X1
AARA21_008273	95427.5	0.738858	1.66885	0.341582	0.0168688	0.0351159	0	0		probable citrate synthase 2, mitochondrial, transcript variant X2
AARA21_009793	1864.78	0.738794	1.66878	0.420202	0.0407005	0.0744983	0	0		UDP-glycosyltransferase UGT5-like
AARA21_010813	41036.4	0.738769	1.66875	0.302228	0.0081812	0.0186446	0	0		chitinase-like protein Idgf4, transcript variant X2
AARA21_002354	4273.43	0.738653	1.66862	0.175588	1.53931e-05	7.55387e-05	1	0		alpha-1,6-mannosyl-glycoprotein 2-beta-N-acetylglucosaminyltransferase, transcript variant X4
AARA21_015037	244.75	0.73819	1.66808	0.281914	0.00509603	0.0123952	0	0		protein lozenge-like, transcript variant X2
AARA21_013899	3732.98	0.738086	1.66796	0.28054	0.00494336	0.0120558	0	0		programmed cell death protein 2
AARA21_009681	422.06	0.738033	1.6679	0.31291	0.0100515	0.0222803	0	0		Bardet-Biedl syndrome 7 protein-like
AARA21_002460	10821.7	0.737973	1.66783	0.234856	0.000981447	0.00292932	1	0		serine/threonine-protein kinase NLK, transcript variant X4
AARA21_004219	8603.74	0.737525	1.66731	0.170205	8.82889e-06	4.59181e-05	1	0		abhydrolase domain-containing protein 2
AARA21_006233	17110.4	0.736764	1.66643	0.189196	5.62282e-05	0.000235664	1	0		integrin alpha-PS2, transcript variant X1
AARA21_012520	341.114	0.736644	1.6663	0.256782	0.00236264	0.00630838	1	0		gonadotropin-releasing hormone II receptor-like
AARA21_002620	5668.51	0.735896	1.66543	0.307895	0.00948566	0.0211749	0	0		cryptochrome-1-like
AARA21_005229	95.9052	0.735451	1.66492	0.990859	0.0959808	0.153796	0	0		microfibril-associated glycoprotein 4-like
AARA21_006370	79.6784	0.735385	1.66484	0.405613	0.0370566	0.0687043	0	0		adenosine receptor A2b
AARA21_012129	17.0181	0.735278	1.66472	0.891643	0.110633	0.172904	0	0		protein spaetzle 5-like
AARA21_001460	98.0408	0.734677	1.66402	0.537875	0.0809956	0.13301	0	0		pro-resilin-like, transcript variant X1
AARA21_004811	79294.9	0.734247	1.66353	0.174468	1.55585e-05	7.61184e-05	1	0		polyubiquitin-C-like
AARA21_003573	65.1163	0.734144	1.66341	0.571355	0.0884414	0.143358	0	0		NGFI-A-binding protein homolog
AARA21_000334	7846.54	0.733637	1.66283	0.159292	1.71953e-06	1.08244e-05	1	0		cyclin-dependent kinase 14, transcript variant X2
AARA21_009666	2.0078	0.733019	1.66211	1.03638	0.0835086	0.136584	0	0		5.8S ribosomal RNA
AARA21_003052	23746.3	0.732778	1.66184	0.150515	6.86591e-07	4.76503e-06	1	0		tropomodulin, transcript variant X6
AARA21_014564	5373.58	0.732266	1.66125	0.25688	0.00242086	0.00644378	1	0		growth/differentiation factor 8-like
AARA21_015438	7815.92	0.731741	1.66064	0.291667	0.00692323	0.0161789	0	0		succinate dehydrogenase assembly factor 2, mitochondrial
AARA21_004055	9976.98	0.731528	1.6604	0.237073	0.00119478	0.00348363	1	0		CD63 antigen-like, transcript variant X1
AARA21_005170	10519	0.729834	1.65845	0.183927	4.26955e-05	0.00018502	1	0		MICOS complex subunit MIC13 homolog QIL1-like
AARA21_010529	1283.15	0.729504	1.65807	0.21561	0.000433647	0.00142231	1	0		mucin-5AC, transcript variant X5
AARA21_001856	3.35051	0.72928	1.65781	0.923877	0.101375	0.160897	0	0		large subunit ribosomal RNA
AARA21_010926	4361.61	0.729117	1.65762	0.206303	0.00024405	0.00085373	1	0		probable serine/threonine-protein kinase DDB_G0267686
AARA21_001789	3220.06	0.728354	1.65675	0.254985	0.0024851	0.00659022	1	0		tachykinins-like, transcript variant X1
AARA21_007245	4116.84	0.727129	1.65534	0.2104	0.000327009	0.0011099	1	0		protein FAM117B-like
AARA21_013729	23954	0.726135	1.6542	0.284552	0.00620032	0.0146924	0	0		annexin B9, transcript variant X4
AARA21_001260	3459.98	0.725569	1.65355	0.279579	0.00614621	0.0145776	0	0		zinc transporter ZIP10
AARA21_013264	2988.87	0.725481	1.65345	0.311711	0.0111454	0.0243766	0	0		oxidative stress-induced growth inhibitor 2-like, transcript variant X1
AARA21_009137	8726.27	0.725344	1.65329	0.178617	2.9709e-05	0.000134459	1	0		protein pangolin, isoforms A/H/I/S-like
AARA21_013448	19128.7	0.72506	1.65297	0.176824	2.63503e-05	0.000120315	1	0		integrin beta-PS, transcript variant X4
AARA21_004739	488.848	0.724849	1.65273	0.346182	0.0200661	0.0406088	0	0		oxidative stress-induced growth inhibitor 2-like
AARA21_010270	2337.32	0.724572	1.65241	0.249571	0.00219024	0.00590196	1	0		glutamate receptor-interacting protein 1, transcript variant X9
AARA21_008039	8226.07	0.724342	1.65215	0.202324	0.000206884	0.000737187	1	0		mucin-19, transcript variant X1
AARA21_009441	3132.73	0.723757	1.65148	0.212039	0.000381823	0.00127179	1	0		dolichyl-diphosphooligosaccharide--protein glycosyltransferase subunit 4
AARA21_003571	53330.6	0.723565	1.65126	0.255191	0.00269309	0.00705743	1	0		putative inorganic phosphate cotransporter, transcript variant X2
AARA21_001138	5031.54	0.723091	1.65072	0.204868	0.000250492	0.000874648	1	0		E3 ubiquitin-protein ligase MIB2
AARA21_014931	824.997	0.722907	1.6505	0.275343	0.00495286	0.0120744	0	0		D-aminoacyl-tRNA deacylase, transcript variant X1
AARA21_007376	8036.7	0.722425	1.64995	0.444256	0.0531389	0.093434	0	0		phenoloxidase-activating factor 2-like, transcript variant X1
AARA21_000857	1579.33	0.72197	1.64943	0.277076	0.00513788	0.0124805	0	0		hemicentin-1, transcript variant X1
AARA21_013893	2048.55	0.721847	1.64929	0.239193	0.00144184	0.00410537	1	0		serine protease inhibitor 77Ba, transcript variant X2
AARA21_007501	2160.27	0.721475	1.64887	0.211175	0.000362152	0.00121539	1	0		alpha-tocopherol transfer protein-like
AARA21_001336	973.937	0.721404	1.64879	0.198941	0.000163971	0.000602978	1	0		hexosaminidase D, transcript variant X3
AARA21_007293	1435.88	0.720301	1.64753	0.170946	1.51274e-05	7.44623e-05	1	0		zinc finger and SCAN domain-containing protein 25
AARA21_013205	4815.8	0.719684	1.64682	0.217642	0.000573603	0.00181787	1	0		39S ribosomal protein L14, mitochondrial
AARA21_005803	7881.91	0.719529	1.64664	0.249459	0.00242726	0.00645547	1	0		glyoxylate reductase/hydroxypyruvate reductase-like, transcript variant X1
AARA21_012155	2834.77	0.71921	1.64628	0.213506	0.000477757	0.00155039	1	0		breast cancer anti-estrogen resistance protein 3 homolog, transcript variant X1
AARA21_006963	6.0844	0.719193	1.64626	0.957418	0.107402	0.168922	0	0		protein piccolo-like
AARA21_001394	10987.7	0.719139	1.6462	0.285736	0.00690716	0.0161531	0	0		xaa-Pro aminopeptidase 1
AARA21_000054	1548.61	0.718737	1.64574	0.208551	0.000354039	0.00119314	1	0		dipeptidase 1
AARA21_003733	3543.5	0.717869	1.64475	0.206965	0.000319099	0.00108477	1	0		fibroblast growth factor receptor, transcript variant X2
AARA21_013031	598.974	0.717724	1.64459	0.279453	0.00611454	0.0145196	0	0		allatostatin-A receptor, transcript variant X2
AARA21_006318	169.596	0.717649	1.6445	0.605927	0.107179	0.168697	0	0		actin, muscle-type A2-like, transcript variant X1
[truncated: 10,868 more rows]

## Sheet: 2d_UNvM(b)
gene	baseMean	log2FoldChange	Fold change	lfcSE	pvalue	padj	padj < 0.01	fold change >2	Up or down regulated	Product Description
AARA21_000001	1603.75	-0.200814	0.87006	0.126219	0.104437	0.208793	0	0		dnaJ homolog subfamily C member 8
AARA21_000002	911.028	0.804812	1.74692	0.360795	0.00739309	0.0286613	0	0		uncharacterized LOC120896388
AARA21_000003	3328.44	0.130389	1.09459	0.139338	0.335235	0.486792	0	0		CD81 protein-like
AARA21_000004	3956.61	0.015506	1.01081	0.107778	0.884742	0.927562	0	0		putative fatty acyl-CoA reductase CG5065, transcript variant X2
AARA21_000005	2396.34	-0.161761	0.893933	0.201984	0.389489	0.54134	0	0		actin-histidine N-methyltransferase
AARA21_008151	83.6302	10.46	1408.52	2.0461	4.9999e-09	2.03588e-07	1	1	up	phenoloxidase-activating factor 3-like, transcript variant X1
AARA21_000007	42.2841	0.183331	1.1355	0.556654	0.386397	0.538537	0	0		uncharacterized LOC120893825
AARA21_000008	9123.66	-0.904752	0.534124	0.369612	0.00334991	0.015405	0	0		peptidoglycan-recognition protein SB2, transcript variant X4
AARA21_000009	3209.07	0.199538	1.14833	0.19554	0.310838	0.46021	0	0		uncharacterized LOC120900930
AARA21_000010	2.80895	0.132214	1.09597	0.548512	0.488235	0.634178	0	0		tRNA-Pro
AARA21_000012	2.88783	0.18585	1.13749	0.552996	0.408853	0.559987	0	0		tRNA-Pro
AARA21_000013	2.13724	0.235604	1.1774	0.595736	0.239117	0.381254	0	0		zinc carboxypeptidase A 1-like
AARA21_000015	593.149	0.105979	1.07622	0.306026	0.678769	0.790659	0	0		uncharacterized LOC120905482
AARA21_000017	10.7668	-0.532633	0.691292	0.669255	0.115622	0.224492	0	0		uncharacterized LOC120901114
AARA21_000019	6983.57	-0.683145	0.622806	0.48724	0.0376831	0.0991551	0	0		uncharacterized LOC120904600
AARA21_000020	343.151	0.856328	1.81042	0.507815	0.019704	0.0608864	0	0		small nucleolar RNA U3
AARA21_000021	1281.95	-0.319507	0.801344	0.261516	0.197741	0.33268	0	0		FAD-linked sulfhydryl oxidase ALR
AARA21_000022	30155.2	0.88054	1.84106	0.231122	3.99307e-05	0.000442921	1	0		calcium-binding mitochondrial carrier protein SCaMC-2, transcript variant X4
AARA21_000023	2069.04	1.19834	2.29476	0.644751	0.00702363	0.0276201	0	1		phenoloxidase 2-like
AARA21_005450	82.7398	12.3971	5393.76	3.83833	2.69018e-06	4.66503e-05	1	1	up	optineurin-like, transcript variant X1
AARA21_000026	1434.47	-0.131075	0.913151	0.133943	0.314892	0.46486	0	0		oxysterol-binding protein-related protein 11
AARA21_000027	2893.72	0.24536	1.18539	0.160616	0.107843	0.213874	0	0		transmembrane protein 147
AARA21_000028	4956.64	-0.811997	0.569593	0.220621	7.51741e-05	0.000745189	1	0		uncharacterized protein CG5098
AARA21_000029	902.165	-0.712283	0.610354	0.218307	0.000466038	0.00324662	1	0		zinc finger protein 585A-like
AARA21_000030	89.3514	-0.0523018	0.964396	0.325542	0.842823	0.900933	0	0		mucin-2, transcript variant X1
AARA21_003971	17.9498	9.47316	710.73	2.5062	4.36982e-10	2.23549e-08	1	1	up	microfibril-associated glycoprotein 4-like
AARA21_000032	1064.34	-0.558944	0.678799	0.335313	0.0441189	0.111594	0	0		uncharacterized LOC120902827
AARA21_000033	5.95352	0.591867	1.5072	0.754504	0.0820693	0.17588	0	0		uncharacterized LOC120905509
AARA21_000034	14.1785	-0.285375	0.820528	0.522357	0.317777	0.46801	0	0		uncharacterized LOC120904472
AARA21_000035	6610.67	0.152711	1.11166	0.193683	0.402923	0.553968	0	0		regulator of nonsense transcripts 1 homolog
AARA21_000036	16795.4	0.220504	1.16514	0.199287	0.237521	0.379509	0	0		GAS2-like protein pickled eggs, transcript variant X2
AARA21_000037	193.802	-0.655442	0.634881	0.365986	0.0279311	0.0790039	0	0		cilia- and flagella-associated protein 57
AARA21_000038	73.106	-0.145468	0.904086	0.335874	0.588616	0.717617	0	0		uncharacterized LOC120905877, transcript variant X1
AARA21_000039	1350.2	-0.323501	0.799128	0.203535	0.0850678	0.180205	0	0		protein abrupt-like
AARA21_000040	467.621	0.774916	1.71109	0.324981	0.00544739	0.0225665	0	0		uncharacterized LOC120906178, transcript variant X1
AARA21_000041	5011.38	-0.0302054	0.979281	0.15776	0.840322	0.899835	0	0		mucin-19, transcript variant X2
AARA21_000042	13651.8	0.620267	1.53716	0.473685	0.0661711	0.150508	0	0		heat shock 70 kDa protein cognate 4-like
AARA21_000044	228.199	-0.233144	0.850779	0.163897	0.135929	0.253476	0	0		uncharacterized LOC120903463
AARA21_000045	3830.72	0.297971	1.22941	0.112063	0.00673222	0.0267439	0	0		F-box only protein 9, transcript variant X1
AARA21_000046	12.6552	-0.049277	0.966421	0.417901	0.863691	0.915338	0	0		uncharacterized LOC120906576
AARA21_006572	78.7905	11.2469	2430.22	2.45269	8.21862e-13	8.05015e-11	1	1	up	uncharacterized LOC120906055
AARA21_000048	1.92567	-0.0659698	0.955303	0.521816	0.749699	0.842184	0	0		hypertrehalosaemic prohormone
AARA21_000050	21446.4	0.485221	1.3998	0.347534	0.0871605	0.183313	0	0		cubilin, transcript variant X15
AARA21_000051	1.76902	-0.410239	0.752499	0.745308	0.0628404	0.144905	0	0		tRNA-Lys
AARA21_000052	1691.11	-0.111656	0.925525	0.240298	0.606069	0.732509	0	0		uncharacterized LOC120893882, transcript variant X1
AARA21_000053	35.611	-0.403691	0.755922	0.375415	0.174445	0.303864	0	0		uncharacterized LOC120906675
AARA21_000054	1548.61	0.028084	1.01966	0.196287	0.880282	0.924829	0	0		dipeptidase 1
AARA21_000055	1674.22	-0.463882	0.725033	0.151124	0.00140908	0.00775477	1	0		protein spitz-like, transcript variant X6
AARA21_000056	282.749	-0.250448	0.840635	0.241753	0.251437	0.395674	0	0		zinc finger protein 567-like
AARA21_000057	383.204	0.456431	1.37214	0.251254	0.0427662	0.109203	0	0		uncharacterized LOC120900461
AARA21_002157	355.065	10.4739	1422.17	1.5739	8.81463e-13	8.52765e-11	1	1	up	peritrophin-1-like
AARA21_000187	407.276	9.3714	662.327	1.11152	1.02655e-18	3.56989e-16	1	1	up	beta-1,3-glucan-binding protein-like
AARA21_000060	2923.28	-0.0271288	0.981371	0.177177	0.83846	0.898664	0	0		uncharacterized LOC120894088
AARA21_000061	46.9169	-0.0469052	0.968011	0.417369	0.870724	0.919534	0	0		uncharacterized LOC120895347
AARA21_000062	3841.83	0.245684	1.18565	0.187017	0.160145	0.286027	0	0		protein SEC13 homolog
AARA21_000063	7690.54	0.358726	1.28229	0.13981	0.00717194	0.0280408	0	0		synaptobrevin-1, transcript variant X10
AARA21_011396	292.773	8.53826	371.768	1.21715	6.35064e-14	8.01115e-12	1	1	up	general odorant-binding protein 56d-like
AARA21_000065	447.727	0.268277	1.20437	0.333156	0.321714	0.472204	0	0		homeobox protein B-H1-like
AARA21_000066	2167.88	0.316356	1.24518	0.328816	0.24421	0.387025	0	0		nyctalopin-like, transcript variant X1
AARA21_000069	27.9954	0.297642	1.22913	0.565059	0.267858	0.413442	0	0		5.8S ribosomal RNA
AARA21_000070	3.81511	-0.341739	0.789089	0.614961	0.20117	0.336338	0	0		5.8S ribosomal RNA
AARA21_000071	32.463	0.56313	1.47747	0.497608	0.0956027	0.195952	0	0		uncharacterized LOC120901707
AARA21_000072	7350.38	-0.196375	0.872741	0.163383	0.207847	0.344749	0	0		sideroflexin-1-3
AARA21_002055	10.6282	9.49859	723.368	2.88059	5.33788e-07	1.16807e-05	1	1	up	fatty acyl-CoA reductase wat-like
AARA21_000075	7454.5	0.566106	1.48052	0.273633	0.0192649	0.0598315	0	0		serine incorporator 1, transcript variant X1
AARA21_000076	7518.14	-0.129958	0.913858	0.125339	0.283481	0.430593	0	0		E3 ubiquitin-protein ligase Iruka, transcript variant X1
AARA21_000077	3310.72	-0.674844	0.6264	0.28981	0.00679269	0.0269342	0	0		squamous cell carcinoma antigen recognized by T-cells 3
AARA21_000078	543.513	0.464637	1.37997	0.321443	0.0833913	0.17756	0	0		sodium-dependent nutrient amino acid transporter 1-like, transcript variant X1
AARA21_000079	326.809	-0.38843	0.763961	0.256035	0.0872189	0.183378	0	0		uncharacterized LOC120896940
AARA21_000080	1611.78	0.0476303	1.03357	0.129509	0.707224	0.811791	0	0		transcription initiation factor TFIID subunit 9
AARA21_000081	3665.49	-0.279242	0.824024	0.173767	0.101704	0.204792	0	0		torsin-like protein, transcript variant X3
AARA21_000082	1.74299	0.109615	1.07894	0.556136	0.494108	0.639606	0	0		uncharacterized LOC120904047
AARA21_000084	20592.1	-0.179792	0.88283	0.402279	0.529987	0.670932	0	0		uncharacterized LOC120903319
AARA21_000085	8531.9	0.119066	1.08603	0.362691	0.655991	0.773253	0	0		kynurenine 3-monooxygenase
AARA21_000086	29.0598	0.968794	1.9572	0.688295	0.0212765	0.0644002	0	0		cytochrome c oxidase subunit 6A2, mitochondrial-like
AARA21_000087	9126.15	0.194791	1.14456	0.31725	0.463389	0.611719	0	0		rutC family protein UK114
AARA21_000088	99.3529	-0.0760231	0.948669	0.333157	0.777384	0.860364	0	0		uncharacterized LOC120895470, transcript variant X2
AARA21_000089	682.261	0.522314	1.43626	0.3142	0.0495567	0.121785	0	0		bromodomain-containing protein DDB_G0280777, transcript variant X2
AARA21_000091	2557.09	-0.254447	0.838308	0.145741	0.0855698	0.180971	0	0		gamma-tubulin complex component 2 homolog, transcript variant X1
AARA21_000092	31198.4	0.0519642	1.03668	0.274656	0.8332	0.895413	0	0		nucleolar protein 56
AARA21_000093	123.711	0.454748	1.37054	0.322973	0.0905229	0.188533	0	0		NADPH oxidase 4-like, transcript variant X2
AARA21_000094	3.43616	0.0348526	1.02445	0.517841	0.868742	0.918119	0	0		LOC120907809
AARA21_005983	175.923	8.19558	293.167	1.47279	6.82264e-10	3.30026e-08	1	1	up	probable chitinase 2
AARA21_000096	7112.03	-0.320736	0.800661	0.167988	0.0447422	0.112793	0	0		glycine-rich RNA-binding protein 10
AARA21_000097	2337.84	-0.128858	0.914555	0.268621	0.582915	0.712624	0	0		uncharacterized LOC120903587
AARA21_000098	6837.45	0.563507	1.47786	0.206384	0.00324944	0.0150397	0	0		PRA1 family protein 3, transcript variant X1
AARA21_000099	7183.95	0.110799	1.07983	0.153947	0.450164	0.599054	0	0		OTU domain-containing protein 7B-like, transcript variant X4
AARA21_000100	1204.2	0.486702	1.40124	0.496255	0.141679	0.261097	0	0		alcohol dehydrogenase 1-like
AARA21_000101	3528.87	0.161677	1.11859	0.214792	0.416821	0.566477	0	0		protein Skeletor, isoforms B/C, transcript variant X2
AARA21_005494	132.119	8.14982	284.013	1.84272	3.35859e-07	7.85727e-06	1	1	up	adult cuticle protein 1-like
AARA21_000103	47487.8	0.183816	1.13588	0.261152	0.430219	0.579222	0	0		disks large 1 tumor suppressor protein, transcript variant X9
AARA21_000105	2.60036	-0.0883407	0.940604	0.546054	0.640253	0.760958	0	0		tRNA-Lys
AARA21_000106	11931.3	-0.437697	0.738312	0.133237	0.000556423	0.00374011	1	0		MAGUK p55 subfamily member 5-A, transcript variant X2
AARA21_000108	2682.17	-0.340147	0.789961	0.32102	0.208209	0.345081	0	0		uncharacterized LOC120905898, transcript variant X2
AARA21_000109	7932.88	-0.587879	0.66532	0.238263	0.00661123	0.0263283	0	0		uncharacterized LOC120898475
AARA21_000110	3657.21	-0.22654	0.854682	0.200548	0.20947	0.346745	0	0		pentatricopeptide repeat-containing protein 1, mitochondrial
AARA21_000111	837.658	-0.0502914	0.965741	0.16975	0.748945	0.841558	0	0		chromatin modification-related protein MEAF6
AARA21_000112	7462.6	0.229902	1.17276	0.194673	0.208524	0.345446	0	0		uncharacterized LOC120908357, transcript variant X1
AARA21_000113	27596.5	0.262533	1.19958	0.266242	0.265676	0.411218	0	0		uncharacterized LOC120896959
AARA21_000114	1108.96	-0.690452	0.61966	0.243004	0.00179358	0.00939275	1	0		E3 ubiquitin-protein ligase RNF220
AARA21_000115	6261.4	-0.00632926	0.995623	0.230676	0.974513	0.984692	0	0		GTPase-activating protein, transcript variant X1
AARA21_012058	167.386	7.85683	231.816	1.69568	1.14677e-07	3.18005e-06	1	1	up	skin secretory protein xP2
AARA21_000117	12138.3	0.0999614	1.07174	0.141895	0.467865	0.615419	0	0		acyl-CoA:lysophosphatidylglycerol acyltransferase 1-like, transcript variant X1
AARA21_000118	3075.71	-0.0942887	0.936734	0.226804	0.648087	0.767292	0	0		muscle M-line assembly protein unc-89, transcript variant X2
AARA21_000119	27242.8	1.94174	3.84169	1.05753	0.00306888	0.0143486	0	1		uncharacterized LOC120897549
AARA21_000120	6627.41	-0.335921	0.792278	0.402155	0.258436	0.403164	0	0		cationic amino acid transporter 2, transcript variant X1
AARA21_000121	9564.05	-0.687399	0.620972	0.380533	0.0240485	0.0704375	0	0		protein aubergine, transcript variant X2
AARA21_000122	50215.7	0.0811684	1.05787	0.205911	0.674732	0.787733	0	0		vesicle-associated membrane protein-associated protein B-like, transcript variant X2
AARA21_000123	939.199	0.0496318	1.035	0.18897	0.785633	0.86629	0	0		protein ALP1-like
AARA21_000124	12.103	0.642352	1.56087	0.828284	0.0613919	0.142304	0	0		uncharacterized LOC120901038
AARA21_000125	45359.4	-0.456912	0.728544	0.469649	0.151691	0.274516	0	0		aminopeptidase N-like
AARA21_000126	10085.7	0.0183743	1.01282	0.44151	0.958802	0.974787	0	0		oxidoreductase ptaE-like
AARA21_000127	7995.98	0.253628	1.1922	0.202956	0.178608	0.30856	0	0		uncharacterized LOC120903154
AARA21_000625	13.2339	8.71784	421.048	3.82002	2.69039e-16	5.40894e-14	1	1	up	microfibril-associated glycoprotein 4-like
AARA21_000129	22.8306	-0.18026	0.882544	0.53127	0.459383	0.608103	0	0		uncharacterized LOC120893348
AARA21_000130	12.495	0.123445	1.08933	0.46027	0.656914	0.773725	0	0		pickpocket protein 28-like
AARA21_000132	5145.93	-0.345025	0.787294	0.1494	0.015392	0.050484	0	0		uncharacterized LOC120906790
AARA21_000133	2.68826	0.200013	1.14871	0.615974	0.0390115	0.101735	0	0		uncharacterized LOC120904382
AARA21_000136	222383	0.0514087	1.03628	0.144317	0.714761	0.817424	0	0		40S ribosomal protein S5
AARA21_000137	5156.74	-0.236991	0.848513	0.18328	0.14657	0.267506	0	0		uncharacterized protein C05D11.1-like
AARA21_000138	4265.48	-0.15178	0.900139	0.184217	0.381916	0.533563	0	0		ubiquitin conjugation factor E4 A
AARA21_000139	993.331	0.352762	1.277	0.22533	0.0869187	0.183015	0	0		bcl-2-related ovarian killer protein, transcript variant X4
AARA21_000141	91.8741	0.208764	1.1557	0.439242	0.485039	0.631935	0	0		uncharacterized LOC120893505, transcript variant X1
AARA21_000142	4619.22	0.61846	1.53524	0.347762	0.0310522	0.0853737	0	0		zinc finger protein 1, transcript variant X2
AARA21_000144	5660.05	0.429932	1.34717	0.12463	0.000372834	0.00275589	1	0		toll-interacting protein-like
AARA21_000145	323.738	-0.341956	0.788971	0.537953	0.25116	0.395312	0	0		uncharacterized LOC120894564
AARA21_000146	65.1878	-0.402858	0.756358	0.493431	0.206344	0.342768	0	0		uncharacterized LOC120893990
AARA21_000147	14733.2	0.962122	1.94817	0.472965	0.00791716	0.0302734	0	0		uncharacterized LOC120894419
AARA21_000148	8823.15	-0.197134	0.872282	0.127067	0.110748	0.217623	0	0		protein HID1, transcript variant X2
AARA21_000149	403.334	0.489938	1.40438	0.358762	0.0894748	0.186895	0	0		uncharacterized LOC120896462, transcript variant X2
AARA21_000150	3778.71	-0.0640756	0.956558	0.36446	0.840097	0.89967	0	0		sterol O-acyltransferase 1-like, transcript variant X2
AARA21_000151	169.705	0.472419	1.38743	0.354435	0.103311	0.207249	0	0		fatty acyl-CoA reductase wat-like, transcript variant X1
AARA21_000152	7735.01	-0.188383	0.877589	0.17723	0.261464	0.40636	0	0		arrestin red cell, transcript variant X8
AARA21_000153	960.003	-0.576891	0.670407	0.302917	0.0269501	0.0770846	0	0		cyclin-dependent kinase 7
AARA21_000154	2625.99	0.548708	1.46278	0.646803	0.11039	0.217183	0	0		transmembrane protease serine 9-like
AARA21_000155	1180.94	-0.194929	0.873616	0.135292	0.133496	0.250465	0	0		zinc finger protein 70-like
AARA21_000157	4627.83	0.156414	1.11451	0.377008	0.585684	0.715194	0	0		sialin
AARA21_000158	10140.4	-0.0923299	0.938007	0.193218	0.609629	0.735499	0	0		cysteine desulfurase, mitochondrial
AARA21_000159	1.30649e+06	-0.615539	0.652686	0.39977	0.0468604	0.116625	0	0		opsin-1-like
AARA21_000161	38.5185	-0.897751	0.536723	0.472271	0.0126274	0.0434199	0	0		uncharacterized LOC120903891
AARA21_005133	837.745	7.57993	191.331	0.740384	4.86021e-26	5.21136e-23	1	1	up	antigen 5 like allergen Cul n 1-like
AARA21_000164	2887.84	-0.249865	0.840975	0.344089	0.363411	0.515205	0	0		protein cramped, transcript variant X1
AARA21_000165	6868.84	0.76307	1.6971	0.329411	0.00656171	0.0261878	0	0		acyl-CoA desaturase, transcript variant X1
AARA21_008577	69.3749	8.33017	321.834	2.2543	7.37959e-06	0.000111578	1	1	up	chymotrypsin-2-like
AARA21_000169	6.24993	0.293397	1.22552	0.588797	0.233457	0.375158	0	0		uncharacterized LOC120898871
AARA21_000170	25241	-0.237977	0.847934	0.165541	0.13456	0.251619	0	0		ankyrin repeat and KH domain-containing protein mask-like
AARA21_000171	522.883	-0.0887681	0.940325	0.442379	0.734423	0.831045	0	0		putative glycine-rich cell wall structural protein 1
AARA21_000172	1158.95	-0.47475	0.719592	0.175292	0.00397946	0.0176504	0	0		exosome complex component RRP46
AARA21_000173	1363.44	0.329127	1.25625	0.42167	0.277369	0.423508	0	0		solute carrier family 52, riboflavin transporter, member 3-A
AARA21_000174	13.3684	-1.5449	0.342718	0.951193	0.00655525	0.0261783	0	1		uncharacterized LOC120893373
AARA21_000175	45456.7	0.0663025	1.04703	0.336536	0.811214	0.881952	0	0		protein mesh, transcript variant X1
AARA21_000176	12.103	0.368856	1.29133	0.477823	0.231302	0.372672	0	0		tektin-2
AARA21_000177	4712.33	0.385187	1.30603	0.166028	0.0150286	0.0495319	0	0		2-oxoisovalerate dehydrogenase subunit alpha, mitochondrial, transcript variant X2
AARA21_000178	442.551	-0.28626	0.820025	0.289338	0.248451	0.392152	0	0		neuromedin-B receptor-like, transcript variant X2
AARA21_010377	13493.9	8.26278	307.145	2.25072	4.15799e-06	6.80771e-05	1	1	up	extracellular matrix-binding protein EbhA-like
AARA21_000180	11980.7	0.0415431	1.02921	0.174646	0.804731	0.877991	0	0		H(+)/Cl(-) exchange transporter 3, transcript variant X1
AARA21_000181	9584.77	0.0122324	1.00851	0.0893352	0.873226	0.920778	0	0		26S proteasome regulatory subunit 6A-B
AARA21_000184	7.38509	0.280422	1.21455	0.566016	0.278031	0.424166	0	0		large subunit ribosomal RNA
AARA21_000185	134.538	0.061876	1.04382	0.282433	0.804892	0.877991	0	0		uncharacterized LOC120897654
AARA21_015365	211.345	7.4074	169.765	1.52664	4.25333e-08	1.33436e-06	1	1	up	acrosin-like
AARA21_000188	52.299	-0.63718	0.642968	0.422211	0.0474914	0.117765	0	0		uncharacterized LOC120906173, transcript variant X1
AARA21_000189	27575.7	0.102957	1.07397	0.212283	0.603201	0.730209	0	0		double-stranded RNA-binding protein Staufen homolog
AARA21_000191	8823.74	0.0191474	1.01336	0.224093	0.928205	0.954541	0	0		uncharacterized LOC120893433, transcript variant X7
AARA21_002211	11847.4	8.10023	274.417	1.12227	2.2067e-14	3.12017e-12	1	1	up	trypsin-7
AARA21_000195	20505.1	0.568224	1.4827	0.189117	0.00141884	0.00779987	1	0		NF-kappa-B essential modulator, transcript variant X1
AARA21_000198	7486.52	0.159699	1.11705	0.185606	0.331545	0.483015	0	0		inositol-pentakisphosphate 2-kinase, transcript variant X1
AARA21_010250	73.9653	6.56356	94.5861	0.963332	4.20878e-13	4.33235e-11	1	1	up	DE-cadherin-like
AARA21_000201	18732.6	1.1107	2.1595	0.447812	0.00210648	0.0106649	0	1		branched-chain-amino-acid aminotransferase, cytosolic
AARA21_000204	505.886	-0.597679	0.660816	0.508448	0.079119	0.171327	0	0		uncharacterized LOC120900992
AARA21_000205	4092.59	0.179971	1.13286	0.28368	0.46607	0.614038	0	0		cilia- and flagella-associated protein 298, transcript variant X5
AARA21_000206	2920.95	-0.183417	0.880615	0.138623	0.171384	0.300074	0	0		serine/arginine repetitive matrix protein 2-like
AARA21_000207	5717.02	0.9793	1.97151	0.34391	0.000962544	0.00572058	1	0		neutral ceramidase-like
AARA21_000208	13.0365	0.567256	1.4817	0.566736	0.101765	0.204856	0	0		general odorant-binding protein 56d-like
AARA21_000209	16672.1	0.574873	1.48955	0.369579	0.0525369	0.127162	0	0		peptidoglycan-recognition protein LB
AARA21_000210	1995.58	0.106367	1.07651	0.150027	0.490884	0.636614	0	0		transmembrane protein 208
AARA21_000212	271.092	-0.349906	0.784635	0.237083	0.100191	0.202648	0	0		uncharacterized LOC120903807, transcript variant X2
AARA21_000214	84.3409	-0.389851	0.763208	0.362151	0.175669	0.305265	0	0		uncharacterized LOC120898134, transcript variant X2
AARA21_000215	1202.82	0.201539	1.14992	0.36932	0.494877	0.640022	0	0		TWiK family of potassium channels protein 7
AARA21_000216	679.867	-0.571026	0.673138	0.237013	0.00818224	0.031093	0	0		zinc finger protein OZF-like
AARA21_000217	16275.6	-0.431038	0.741728	0.311695	0.100367	0.202927	0	0		baculoviral IAP repeat-containing protein 6, transcript variant X1
AARA21_000218	2928.4	0.855574	1.80948	0.272333	0.000491706	0.00339602	1	0		voltage-dependent calcium channel subunit alpha-2/delta-3
AARA21_000219	3091.07	0.162321	1.11909	0.216637	0.443498	0.592666	0	0		uncharacterized LOC120897576, transcript variant X2
AARA21_000220	894.276	-0.67107	0.628041	0.509365	0.0503093	0.122973	0	0		probable ATP-dependent DNA helicase HFM1, transcript variant X2
AARA21_000222	4.45073	0.0863066	1.06165	0.531027	0.661034	0.7767	0	0		histidine-rich protein PFHRP-II-like
AARA21_000223	14954	-0.329492	0.795817	0.326781	0.220306	0.358956	0	0		uncharacterized LOC120905520, transcript variant X1
AARA21_000224	5697.29	-0.0486143	0.966865	0.240638	0.844723	0.902296	0	0		regulatory-associated protein of mTOR
AARA21_000226	227.278	0.246727	1.18651	0.270372	0.287292	0.434484	0	0		uncharacterized LOC120902033
AARA21_000227	22652.1	-0.237609	0.84815	0.301118	0.350444	0.502358	0	0		ataxin-8-like
AARA21_000230	4659.47	0.992886	1.99016	0.75893	0.0228645	0.0677515	0	0		CLIP domain-containing serine protease B15
AARA21_000232	233.506	-0.0317489	0.978234	0.299207	0.897266	0.935345	0	0		uncharacterized LOC120905050
AARA21_000233	108.996	-0.635867	0.643554	1.03083	0.0306686	0.0845902	0	0		uncharacterized LOC120900281
AARA21_013724	1044.85	7.80299	223.323	1.46537	2.72788e-09	1.1739e-07	1	1	up	angiotensin-converting enzyme-like
AARA21_000237	1004.39	0.604418	1.52037	0.353913	0.0371201	0.0978539	0	0		uncharacterized LOC120895921
AARA21_000238	3209.42	0.801617	1.74305	0.275901	0.00107209	0.00624191	1	0		sodium-dependent nutrient amino acid transporter 1-like
AARA21_000239	283.264	0.618864	1.53567	0.290012	0.0143528	0.0478441	0	0		cilia- and flagella-associated protein 36
AARA21_000240	3517.75	-0.121902	0.918976	0.155582	0.431905	0.581234	0	0		chitinase-3-like protein 2, transcript variant X1
AARA21_000242	428.576	-0.561529	0.677584	0.266151	0.0174631	0.0554809	0	0		transcription factor Adf-1-like
AARA21_012877	214.625	6.40666	84.8391	0.952477	5.83826e-13	5.86882e-11	1	1	up	cyclin-dependent kinase inhibitor 1C-like
AARA21_006480	44.1164	7.54476	186.724	1.36902	2.43944e-09	1.06041e-07	1	1	up	fibrinogen-like protein 1
AARA21_000245	5211.12	0.34745	1.27231	0.197156	0.0586421	0.137892	0	0		ATPase ASNA1 homolog, transcript variant X1
AARA21_000246	245.408	0.225465	1.16915	0.265081	0.334511	0.486071	0	0		leucine-rich repeat and immunoglobulin-like domain-containing nogo receptor-interacting protein 1
AARA21_000247	75.3557	-0.393159	0.76146	0.498181	0.210798	0.348316	0	0		venom allergen 5-like
AARA21_001424	1180.66	6.26469	76.8883	1.11278	6.73901e-10	3.27211e-08	1	1	up	LOC120895121
AARA21_000251	2985.73	0.0748874	1.05328	0.115086	0.526902	0.668406	0	0		multiple inositol polyphosphate phosphatase 1
AARA21_000252	11489.5	1.03426	2.04806	0.406324	0.00204779	0.0104394	0	1		titin, transcript variant X2
AARA21_000254	1538.85	-0.161324	0.894204	0.149219	0.250033	0.393971	0	0		GDP-fucose protein O-fucosyltransferase 2, transcript variant X2
AARA21_000256	55.624	-0.256148	0.837321	0.463639	0.38492	0.536711	0	0		uncharacterized LOC120904133
AARA21_000257	408.793	-0.318231	0.802053	0.182511	0.0652689	0.149088	0	0		uncharacterized LOC120901460
AARA21_000258	1772.23	-0.196715	0.872535	0.257446	0.380627	0.532224	0	0		protein fork head
AARA21_000259	9261.8	0.185891	1.13752	0.28062	0.448467	0.597414	0	0		thyroglobulin-like
AARA21_000260	4427.34	0.172111	1.12671	0.221371	0.399483	0.550868	0	0		D-glucuronyl C5-epimerase B, transcript variant X2
AARA21_000261	5.05016	-0.0501274	0.965851	0.500683	0.829997	0.893775	0	0		uncharacterized LOC120901740
AARA21_000262	897.101	-0.349628	0.784786	0.177898	0.0379569	0.0996311	0	0		mediator of RNA polymerase II transcription subunit 24
AARA21_000263	1372.8	-0.306795	0.808436	0.372836	0.285725	0.432674	0	0		pachytene checkpoint protein 2 homolog
AARA21_000264	9522.01	-0.0159537	0.989003	0.230723	0.937569	0.959903	0	0		mucin-19
AARA21_000265	7.19516	2.58852	6.01481	2.36747	0.00506965	0.0213383	0	1		proteoglycan 4-like
AARA21_000266	32.5862	0.836326	1.7855	0.801506	0.0399628	0.103649	0	0		uncharacterized LOC120902520
AARA21_000267	9688.1	0.533243	1.44718	0.125568	1.28812e-05	0.000176509	1	0		centrosomin, transcript variant X2
AARA21_000268	15.9277	0.658397	1.57833	0.668384	0.0710275	0.158116	0	0		katanin p60 ATPase-containing subunit A-like 2
AARA21_000269	16.8202	1.1259	2.18237	0.740236	0.012786	0.0438013	0	1		phospholipase B1, membrane-associated-like, transcript variant X1
AARA21_000270	2564.32	-0.460803	0.726582	0.380628	0.119003	0.229189	0	0		diphthine methyl ester synthase
AARA21_001469	43.2004	7.48556	179.217	1.36699	1.88648e-09	8.42824e-08	1	1	up	uncharacterized LOC120904444, transcript variant X1
AARA21_000272	8939.33	0.158546	1.11616	0.317269	0.552226	0.687717	0	0		inactivation-no-after-potential D protein, transcript variant X4
AARA21_000275	4985.48	-0.212378	0.863113	0.0986439	0.0279979	0.079054	0	0		signal recognition particle subunit SRP72
AARA21_002274	42.2	5.79866	55.6635	1.04875	2.89122e-08	9.56332e-07	1	1	up	LOC120907516
AARA21_000278	1322.03	0.445377	1.36167	0.202805	0.0184438	0.0578115	0	0		beta-1,3-glucosyltransferase
AARA21_000279	2403.45	-0.145316	0.904181	0.357045	0.604966	0.731726	0	0		DNA-directed RNA polymerases I and III subunit RPAC1
AARA21_000281	19039.4	0.283164	1.21686	0.269555	0.233449	0.375158	0	0		protein bunched, class 2/F/G isoform-like, transcript variant X4
AARA21_000282	22624.4	0.471666	1.38671	0.211364	0.0143818	0.0478885	0	0		ribonuclease kappa
AARA21_000284	2409.89	-0.301099	0.811634	0.18446	0.0839194	0.178448	0	0		lachesin, transcript variant X1
AARA21_000285	1732.84	0.0069533	1.00483	0.2374	0.977506	0.986244	0	0		eEF1A lysine and N-terminal methyltransferase homolog
AARA21_000286	10822	-0.056039	0.961901	0.186642	0.748816	0.841487	0	0		box A-binding factor, transcript variant X4
AARA21_015370	3.71437	5.71153	52.4012	2.56107	0.000158735	0.0013791	1	1	up	astacin-like, transcript variant X1
AARA21_000289	4362.84	0.0901295	1.06447	0.273834	0.702223	0.80804	0	0		uncharacterized protein DDB_G0271670-like, transcript variant X4
AARA21_000290	2.21802	-0.747493	0.595638	1.33908	0.0235235	0.0692626	0	0		uncharacterized LOC120894356
AARA21_000291	10833.8	0.0676418	1.048	0.227324	0.785011	0.865679	0	0		myosin-2 essential light chain, transcript variant X7
AARA21_000292	5168.04	0.317694	1.24634	0.203593	0.0940495	0.193994	0	0		galactosylgalactosylxylosylprotein 3-beta-glucuronosyltransferase P, transcript variant X2
AARA21_000293	123.678	0.226295	1.16983	0.335291	0.406658	0.557951	0	0		endothelin-converting enzyme homolog, transcript variant X2
AARA21_000294	1001.63	-0.0257364	0.982319	0.139887	0.837441	0.89832	0	0		zinc finger MYND domain-containing protein 11
AARA21_002955	135.351	7.37635	166.151	1.31631	6.99757e-10	3.36528e-08	1	1	up	prisilkin-39-like, transcript variant X1
AARA21_000296	7976.98	0.275332	1.21027	0.192731	0.129329	0.244646	0	0		leucine-rich repeat serine/threonine-protein kinase 1, transcript variant X1
AARA21_000297	6015.2	0.904873	1.87238	0.302744	0.000719967	0.00455583	1	0		iron-sulfur cluster assembly 2 homolog, mitochondrial
AARA21_000298	2569.5	-0.600528	0.659513	0.229359	0.00424297	0.0185128	0	0		THO complex subunit 5 homolog
AARA21_000299	2673.98	0.29619	1.2279	0.142815	0.0319894	0.0873345	0	0		coatomer subunit epsilon
AARA21_000300	3.51623	-2.18212	0.220351	1.97796	0.00737106	0.0286104	0	1		uncharacterized LOC120897047
AARA21_000301	435.656	0.77084	1.70626	0.345948	0.00777948	0.0298891	0	0		zinc metalloproteinase-disintegrin-like EoMP06
AARA21_000302	44781.1	0.84344	1.79432	0.824262	0.0398436	0.103524	0	0		troponin C, isoallergen Bla g 6.0101-like
AARA21_000303	50574.8	0.703607	1.62857	0.610321	0.0588718	0.138382	0	0		uncharacterized PE-PGRS family protein PE_PGRS46-like, transcript variant X2
AARA21_005275	4.91428	7.35165	163.33	3.36323	0.000272023	0.00212774	1	1	up	caspase-like
AARA21_000306	2772.73	-0.0306197	0.979	0.164394	0.856598	0.910697	0	0		transmembrane protein 185B, transcript variant X3
AARA21_000307	1456.46	-0.505435	0.704448	0.275394	0.0311772	0.0856808	0	0		U6 small nuclear RNA (adenine-(43)-N(6))-methyltransferase
AARA21_007014	595.226	7.09389	136.607	1.08465	1.76728e-12	1.61273e-10	1	1	up	uncharacterized LOC120900335
AARA21_008774	5.12917	7.0841	135.683	2.6875	2.22257e-05	0.000275719	1	1	up	uncharacterized LOC120897545
AARA21_000313	1563.75	0.512257	1.42628	0.192674	0.00462097	0.0198289	0	0		cytochrome c oxidase assembly protein COX11, mitochondrial
AARA21_000315	1361.79	0.156484	1.11457	0.272237	0.52549	0.667141	0	0		uncharacterized LOC120902047, transcript variant X2
AARA21_000317	12371.9	-0.27537	0.826239	0.401882	0.356113	0.508192	0	0		uncharacterized LOC120896534
AARA21_000319	618.36	-0.449588	0.732252	0.186066	0.0102321	0.0371178	0	0		uncharacterized LOC120902639
AARA21_000320	887.115	-0.419516	0.747675	0.263244	0.0715199	0.158745	0	0		RAB6-interacting golgin
AARA21_000321	3527.45	-0.277663	0.824926	0.202454	0.128868	0.243988	0	0		xenotropic and polytropic retrovirus receptor 1-like
AARA21_000322	48225.5	0.0312549	1.0219	0.149908	0.830709	0.89408	0	0		uncharacterized LOC120905060
AARA21_000324	1989.05	0.508265	1.42234	0.301449	0.0496764	0.121936	0	0		pyruvate dehydrogenase phosphatase regulatory subunit, mitochondrial-like, transcript variant X1
AARA21_000325	11730.7	0.0216379	1.01511	0.200448	0.891715	0.931912	0	0		uncharacterized LOC120901096
AARA21_000326	1936.86	-0.679015	0.624591	0.159368	8.62199e-06	0.000127078	1	0		xyloside xylosyltransferase 1
AARA21_003915	1553.92	7.05589	133.056	1.16577	6.15299e-11	3.84323e-09	1	1	up	mucin-5AC-like
AARA21_000328	2861.72	-0.55816	0.679168	0.268509	0.0187118	0.0585091	0	0		ESF1 homolog, transcript variant X2
AARA21_000330	1866.35	0.0316825	1.0222	0.355037	0.89071	0.931466	0	0		uncharacterized LOC120900457
AARA21_000331	730.291	0.567943	1.48241	0.367398	0.0550244	0.131476	0	0		paired box protein Pax-7-like, transcript variant X1
AARA21_000332	6.03215	-0.0278976	0.980849	0.552377	0.815064	0.883575	0	0		uncharacterized LOC120902585
AARA21_000334	7846.54	0.0729617	1.05187	0.153968	0.57107	0.703558	0	0		cyclin-dependent kinase 14, transcript variant X2
AARA21_000335	12.4331	-1.37996	0.38423	1.12046	0.0124612	0.0430322	0	1		uncharacterized LOC120895445
AARA21_000336	588605	0.199661	1.14843	0.250338	0.376575	0.527993	0	0		eukaryotic translation elongation factor 2, transcript variant X1
AARA21_000337	1910.29	0.407091	1.32601	0.386806	0.167111	0.294955	0	0		uncharacterized LOC120900120
AARA21_000339	10550.8	-0.404267	0.75562	0.246223	0.0675298	0.152815	0	0		uncharacterized LOC120896218
AARA21_000340	2978.34	-0.15004	0.901226	0.24309	0.503831	0.647657	0	0		KRR1 small subunit processome component homolog
AARA21_000341	6175.6	-0.404083	0.755716	0.231933	0.0563515	0.133901	0	0		protein unc-13 homolog A, transcript variant X2
AARA21_000342	5199.4	0.764551	1.69884	0.181902	9.76493e-06	0.000139966	1	0		reactive oxygen species modulator 1
AARA21_000343	228.254	0.371269	1.29349	0.334489	0.174949	0.304446	0	0		borealin-like, transcript variant X2
AARA21_000344	14.4273	-0.0155888	0.989253	0.471365	0.951366	0.969679	0	0		putative gustatory receptor 28a
AARA21_000345	2570.24	-0.404695	0.755396	0.109769	0.000156134	0.00136867	1	0		glycerol kinase 3
AARA21_000347	20.9453	0.257292	1.19523	0.506885	0.374234	0.525637	0	0		uncharacterized LOC120902433
AARA21_000348	5.56928	0.0689654	1.04896	0.503005	0.761123	0.849507	0	0		LOC120907084
AARA21_000349	177740	0.070745	1.05026	0.168491	0.662543	0.77761	0	0		60S ribosomal protein L17, transcript variant X1
AARA21_000351	2758.01	0.031223	1.02188	0.159814	0.846343	0.903093	0	0		metal regulatory transcription factor 1, transcript variant X1
AARA21_000352	2.57548	0.151587	1.11079	0.548231	0.44454	0.593658	0	0		LOC120908168
AARA21_009799	12561.4	5.70255	52.076	1.11883	9.48345e-09	3.63973e-07	1	1	up	fibrinogen C domain-containing protein 1-like
AARA21_000354	10.7693	-0.526753	0.694115	0.697624	0.107984	0.214071	0	0		uncharacterized LOC120908323
AARA21_000355	190.41	0.294428	1.2264	0.46178	0.327472	0.478653	0	0		uncharacterized protein K02A2.6-like
AARA21_000356	4583.03	-0.376379	0.770369	0.138455	0.00478336	0.0203396	0	0		protein piccolo
AARA21_000358	469.3	-0.932444	0.52397	0.203747	1.31232e-06	2.53538e-05	1	0		zinc finger protein 354A-like, transcript variant X1
AARA21_000359	9.7543	0.169803	1.1249	0.505649	0.512582	0.655606	0	0		uncharacterized LOC120896610
AARA21_000360	2055.64	0.117429	1.0848	0.376525	0.683703	0.794205	0	0		uncharacterized LOC120893678
AARA21_005017	41.7155	5.64025	49.8753	1.34709	8.34886e-07	1.72431e-05	1	1	up	very long-chain specific acyl-CoA dehydrogenase, mitochondrial-like
AARA21_012016	183.821	6.8288	113.677	1.33339	1.25567e-08	4.65611e-07	1	1	up	probable chitinase 10
AARA21_000363	194.062	0.425057	1.34263	0.516258	0.183851	0.315415	0	0		uncharacterized LOC120897574, transcript variant X1
AARA21_000364	4267.08	0.369084	1.29153	0.200763	0.0472853	0.117433	0	0		uncharacterized LOC120894148, transcript variant X1
AARA21_000365	6552.62	0.290735	1.22326	0.203542	0.126199	0.240172	0	0		adenylate cyclase type 9, transcript variant X1
AARA21_000366	114.157	-0.708543	0.611938	0.272502	0.00349085	0.0158716	0	0		intraflagellar transport protein 46 homolog, transcript variant X1
AARA21_000367	5.02136	0.0387316	1.02721	0.495132	0.877129	0.922686	0	0		MAGE-like protein 2
AARA21_000369	1243.97	-0.369723	0.773931	0.484731	0.235332	0.377276	0	0		uncharacterized LOC120906844
AARA21_014433	15.8792	6.71051	104.729	1.39011	1.15735e-07	3.19044e-06	1	1	up	uncharacterized LOC120897252
AARA21_000372	6.85542	-0.227801	0.853936	0.547047	0.367176	0.519	0	0		tRNA-Lys
AARA21_000373	9363.65	-0.215936	0.860987	0.240858	0.320026	0.470333	0	0		DNA damage-regulated autophagy modulator protein 1
AARA21_000376	16.3741	0.168405	1.12382	0.522988	0.501936	0.645841	0	0		tudor domain-containing protein 1-like
AARA21_000377	1761.8	-0.417641	0.748648	0.243676	0.0564491	0.134083	0	0		pseudouridine-metabolizing bifunctional protein C1861.05
AARA21_000378	1726.15	-0.387215	0.764604	0.166181	0.0145928	0.0484271	0	0		helicase SKI2W
AARA21_000379	2992.3	-0.692369	0.618837	0.230691	0.00108005	0.00627688	1	0		replication protein A 70 kDa DNA-binding subunit
AARA21_000380	9123.37	0.259508	1.19707	0.214932	0.192072	0.325354	0	0		putative RNA-binding protein Luc7-like 2, transcript variant X1
AARA21_000381	4358.02	0.501586	1.41577	0.281817	0.0420925	0.107954	0	0		uncharacterized LOC120901255
AARA21_000382	15328.7	0.907565	1.87588	0.155271	1.48361e-09	6.76938e-08	1	0		pyridoxal kinase
AARA21_000383	8244.78	-0.431766	0.741354	0.230859	0.03994	0.103631	0	0		deoxynucleotidyltransferase terminal-interacting protein 2
AARA21_010174	321.422	6.70281	104.171	1.17099	3.96683e-10	2.04165e-08	1	1	up	uncharacterized LOC120903956
AARA21_000387	964.315	0.0299762	1.021	0.361019	0.919389	0.948811	0	0		uncharacterized LOC120898556, transcript variant X1
AARA21_000388	10316.1	-0.258122	0.836176	0.112596	0.0172922	0.0550195	0	0		26S proteasome non-ATPase regulatory subunit 1
AARA21_000389	2727.57	-0.174308	0.886193	0.292268	0.495332	0.640423	0	0		uncharacterized LOC120908580, transcript variant X5
AARA21_000390	6459.02	-0.280247	0.82345	0.130946	0.0273027	0.0777393	0	0		tight junction protein ZO-1, transcript variant X1
AARA21_000391	5.26144	0.364811	1.28771	0.644442	0.155849	0.280385	0	0		uncharacterized LOC120906253
AARA21_000393	5.25441	-0.268699	0.830068	0.592548	0.249783	0.393723	0	0		tRNA-Gln
AARA21_000395	2.10931	0.0763566	1.05435	0.538885	0.689794	0.798451	0	0		uncharacterized LOC120896541
AARA21_012442	165.378	6.6982	103.839	1.53715	5.16508e-07	1.13995e-05	1	1	up	uncharacterized LOC120893925
AARA21_000397	1195.54	0.0293221	1.02053	0.121507	0.805639	0.878339	0	0		protein C12orf4 homolog
AARA21_000398	2.64619	0.0237025	1.01657	0.519428	0.913059	0.944399	0	0		uncharacterized LOC120900948
AARA21_000399	25114.2	-0.130349	0.91361	0.244405	0.551187	0.686888	0	0		vacuolar protein sorting-associated protein 13, transcript variant X1
AARA21_000400	535.903	-0.350093	0.784533	0.222897	0.0882893	0.185072	0	0		lachesin, transcript variant X1
AARA21_000402	4902.69	0.184658	1.13655	0.248868	0.410476	0.561174	0	0		band 7 protein AGAP004871, transcript variant X1
AARA21_000403	21.2144	0.291851	1.22421	0.598402	0.234073	0.375819	0	0		uncharacterized LOC120902702
AARA21_000404	3084.11	-0.38134	0.767724	0.162905	0.0140413	0.0470369	0	0		RILP-like protein homolog
AARA21_000405	15159.4	0.907564	1.87587	0.212131	5.24599e-06	8.30261e-05	1	0		glutamate--cysteine ligase regulatory subunit, transcript variant X2
AARA21_000406	14.4175	0.164964	1.12114	0.450293	0.556736	0.691392	0	0		5.8S ribosomal RNA
AARA21_000407	4361.07	-0.100004	0.933031	0.101932	0.321739	0.472204	0	0		vesicular integral-membrane protein VIP36, transcript variant X2
AARA21_000408	5504.68	-0.215012	0.861539	0.184092	0.220528	0.359136	0	0		tudor and KH domain-containing protein homolog, transcript variant X1
AARA21_000409	127.396	0.298468	1.22984	0.333366	0.274107	0.419986	0	0		trichohyalin, transcript variant X2
AARA21_000410	552.408	0.0725791	1.05159	0.269455	0.722396	0.822719	0	0		carbonic anhydrase-related protein 10, transcript variant X1
AARA21_000411	13076.3	-0.204695	0.867722	0.19327	0.257969	0.402697	0	0		uncharacterized LOC120908423, transcript variant X1
AARA21_000412	2849.34	0.124935	1.09046	0.27519	0.593563	0.721975	0	0		potassium voltage-gated channel subfamily H member 8, transcript variant X1
AARA21_000413	2184.97	-0.64927	0.637603	0.459311	0.0534184	0.128762	0	0		sodium-dependent nutrient amino acid transporter 1-like, transcript variant X4
AARA21_011807	85.3949	5.55582	47.0401	0.823625	5.32577e-13	5.3958e-11	1	1	up	phospholipase A1-like, transcript variant X1
AARA21_000415	6337.84	0.123199	1.08915	0.146277	0.384365	0.536111	0	0		SUMO-conjugating enzyme UBC9-B
AARA21_000416	923.047	0.488272	1.40276	0.245006	0.0254695	0.073578	0	0		insulin gene enhancer protein isl-1, transcript variant X2
AARA21_000419	4365.96	-0.215453	0.861276	0.319287	0.41272	0.562961	0	0		protein penguin
AARA21_000420	360.474	-0.505849	0.704246	0.235793	0.018177	0.0571564	0	0		uncharacterized LOC120908568
AARA21_000421	7682.04	-0.0145367	0.989975	0.362194	0.955964	0.972705	0	0		LON peptidase N-terminal domain and RING finger protein 3
AARA21_000422	3006.56	-0.0557512	0.962093	0.146885	0.659214	0.775472	0	0		traB domain-containing protein
AARA21_000423	4032.76	-0.0873016	0.941282	0.113451	0.431939	0.581234	0	0		2-hydroxyacyl-CoA lyase 1
AARA21_000425	8.42025	0.0515979	1.03641	0.505299	0.827262	0.892386	0	0		uncharacterized LOC120908247
AARA21_000426	200.839	-1.20994	0.432285	0.632364	0.00624525	0.0251432	0	1		uncharacterized protein K02A2.6-like
AARA21_000427	929.009	-0.199172	0.871051	0.235223	0.342431	0.494285	0	0		RNA exonuclease 4-like, transcript variant X2
AARA21_010549	2124.38	6.50469	90.8041	1.0231	7.7199e-12	6.28683e-10	1	1	up	synaptic vesicle glycoprotein 2B-like
AARA21_008172	4.08761	6.48376	89.4967	3.94815	0.00119584	0.00680531	1	1	up	caspase-like
AARA21_000430	1891.17	-0.223576	0.85644	0.108791	0.0380163	0.099726	0	0		protein TAPT1 homolog
AARA21_000431	8614.24	-0.24182	0.845678	0.129774	0.0550707	0.131538	0	0		cyclin-G-associated kinase
AARA21_000433	2220.74	-0.786262	0.579844	0.313399	0.00327144	0.015109	0	0		RINT1-like protein
AARA21_000434	7.13234	0.112526	1.08112	0.480795	0.682185	0.793211	0	0		uncharacterized LOC120895399
AARA21_000435	1620.93	-0.23472	0.84985	0.170489	0.148619	0.270196	0	0		uncharacterized LOC120898427
AARA21_000436	5184.61	-0.263412	0.833115	0.24108	0.226434	0.366712	0	0		exportin-4-like
AARA21_000437	16157.2	-0.0450645	0.969246	0.178967	0.788781	0.868347	0	0		aspartate--tRNA ligase, cytoplasmic
AARA21_000438	1871.75	0.471393	1.38645	0.360507	0.100583	0.203202	0	0		secreted protein C, transcript variant X2
AARA21_000439	1998.2	-0.670452	0.62831	0.49288	0.0464122	0.116004	0	0		uncharacterized LOC120904832
AARA21_000442	2933.46	-0.0831243	0.944011	0.163068	0.584241	0.713727	0	0		cadherin-related family member 5-like, transcript variant X2
AARA21_010268	13.6475	6.47636	89.0388	1.88659	2.18069e-05	0.000271101	1	1	up	pancreatic triacylglycerol lipase-like
AARA21_000444	1164.2	0.759744	1.69319	0.216486	0.000166559	0.00143065	1	0		heparan-alpha-glucosaminide N-acetyltransferase
AARA21_000445	66.9081	0.161741	1.11864	0.415586	0.582523	0.712313	0	0		uncharacterized LOC120900857
AARA21_000446	1491.34	0.607586	1.52371	0.299786	0.0191742	0.0596102	0	0		GTP:AMP phosphotransferase AK3, mitochondrial
AARA21_000447	1528.67	-0.84569	0.556445	0.401041	0.00748268	0.0289302	0	0		ATP-dependent DNA helicase PIF1
AARA21_000448	4068.67	-0.0302438	0.979255	0.129593	0.803464	0.877529	0	0		TBC1 domain family member 17
AARA21_000449	319.925	-0.712314	0.610341	0.31891	0.00930904	0.0345684	0	0		uncharacterized protein C2orf42
AARA21_000450	1766.48	0.407611	1.32649	0.23064	0.0527258	0.127451	0	0		protein eva-1-like, transcript variant X1
AARA21_000451	7.208	0.209925	1.15663	0.533386	0.402414	0.553545	0	0		uncharacterized LOC120905218
AARA21_000453	4196.07	-0.265196	0.832086	0.0945884	0.00335715	0.0154328	0	0		transmembrane protein 115
AARA21_000455	61935.7	0.150948	1.1103	0.206889	0.434851	0.58397	0	0		protein Pixie, transcript variant X2
AARA21_010975	11170.9	5.54361	46.6437	0.720146	5.88002e-16	1.12923e-13	1	1	up	probable cytochrome P450 6a14
AARA21_000458	15.8004	-0.512862	0.700831	0.551391	0.126475	0.240519	0	0		uncharacterized LOC120902761
AARA21_000459	3891.31	-0.283474	0.82161	0.250826	0.205885	0.34215	0	0		uncharacterized LOC120894156
AARA21_000461	4472.73	-0.122511	0.918588	0.177906	0.467736	0.615374	0	0		adenylyltransferase and sulfurtransferase MOCS3, transcript variant X1
AARA21_000462	29.1625	-0.0143368	0.990112	0.443158	0.947823	0.96768	0	0		uncharacterized LOC120893520
AARA21_000465	20.319	0.6643	1.5848	1.2466	0.0124384	0.0429882	0	0		uncharacterized protein K02A2.6-like
AARA21_013866	108.918	6.42364	85.8435	1.01007	6.65614e-12	5.57308e-10	1	1	up	proton channel OtopLc-like
AARA21_000468	574.395	-0.397649	0.759094	0.328528	0.139409	0.258096	0	0		cilia- and flagella-associated protein 20
AARA21_000469	15553.2	-0.206602	0.866576	0.286774	0.400738	0.551988	0	0		inosine-5'-monophosphate dehydrogenase
AARA21_000470	2433.85	0.351717	1.27608	0.22575	0.0895709	0.187065	0	0		SPRY domain-containing protein 7
AARA21_000472	2694.06	0.0234687	1.0164	0.146327	0.857559	0.911165	0	0		GTPase Era, mitochondrial
AARA21_000474	380.878	-0.557834	0.679321	0.453123	0.0871006	0.183304	0	0		zinc finger protein 431-like
AARA21_000475	146.87	1.02653	2.03712	0.619239	0.0130264	0.044412	0	1		odorant receptor 67d-like
AARA21_000476	4.61459	-0.173286	0.886821	0.558445	0.402937	0.553968	0	0		uncharacterized protein K02A2.6-like
AARA21_011986	790.756	5.4205	42.8286	1.0935	2.25329e-08	7.75217e-07	1	1	up	sorbitol dehydrogenase-like
AARA21_000478	2915.22	0.0267456	1.01871	0.233133	0.890911	0.931559	0	0		serine-enriched protein, transcript variant X5
AARA21_000479	963.529	-0.581115	0.668447	0.470872	0.0793906	0.171739	0	0		SET and MYND domain-containing protein 4-like
AARA21_002281	53.9822	6.37678	83.1001	1.23106	7.21747e-09	2.81416e-07	1	1	up	uncharacterized LOC120903980
AARA21_000481	1249.28	0.299515	1.23073	0.165488	0.0570271	0.135077	0	0		uncharacterized LOC120895329, transcript variant X2
AARA21_000482	2143.02	-0.401332	0.757159	0.254367	0.0789222	0.17107	0	0		serine/threonine-protein kinase RIO1
AARA21_000483	41.399	0.113122	1.08157	0.505484	0.654925	0.772376	0	0		uncharacterized LOC120899534
AARA21_000484	2.69831	-0.0298202	0.979542	0.541974	0.847676	0.903949	0	0		E3 SUMO-protein ligase ZBED1-like
AARA21_000485	910.505	-0.0262801	0.981949	0.2329	0.891887	0.93194	0	0		kelch-like protein 17, transcript variant X1
AARA21_005333	7.51562	6.3207	79.932	2.31221	5.28656e-06	8.35653e-05	1	1	up	uncharacterized LOC120898409
AARA21_001737	15.1357	6.31822	79.7945	2.41828	0.000218214	0.00178158	1	1	up	venom serine protease inhibitor
AARA21_000489	1936.53	-0.172147	0.887521	0.14703	0.183909	0.315415	0	0		F-box/LRR-repeat protein 20-like, transcript variant X3
AARA21_000491	5489.6	-0.516136	0.699242	0.20125	0.00593277	0.0241879	0	0		clathrin heavy chain-like
AARA21_000492	24.1586	-0.166801	0.890816	0.403038	0.562541	0.696384	0	0		uncharacterized LOC120900226
AARA21_000493	3547.82	0.549447	1.46352	0.139278	4.5381e-05	0.000491513	1	0		39S ribosomal protein L4, mitochondrial
AARA21_000494	2418.02	0.103748	1.07456	0.139477	0.449267	0.598356	0	0		short coiled-coil protein homolog
AARA21_010719	668.109	6.30278	78.9452	1.29402	3.80201e-08	1.21996e-06	1	1	up	uncharacterized LOC120902772
AARA21_002104	53.3266	6.28114	77.7697	1.30713	5.41078e-08	1.63046e-06	1	1	up	enhancer of split malpha protein-like
AARA21_000497	329.817	1.07198	2.10231	0.646735	0.0121117	0.0421193	0	1		general odorant-binding protein 72-like
AARA21_000498	1972.82	-0.0363341	0.97513	0.250364	0.868855	0.918164	0	0		probable U3 small nucleolar RNA-associated protein 11
AARA21_012207	4213.4	5.3816	41.6891	0.913585	1.45107e-10	8.37261e-09	1	1	up	sorbitol dehydrogenase-like
AARA21_000502	2441.49	0.497987	1.41224	0.27416	0.0389281	0.101579	0	0		dual specificity protein phosphatase Mpk3, transcript variant X4
AARA21_000503	147.245	-0.284955	0.820767	0.309478	0.27569	0.421696	0	0		transmembrane protein 267
AARA21_000504	30191.9	0.0752279	1.05353	0.206532	0.614853	0.739237	0	0		leupaxin, transcript variant X6
AARA21_000506	774.246	0.479606	1.39436	0.198791	0.00977583	0.0358875	0	0		endonuclease G, mitochondrial
AARA21_000507	7218.61	0.18379	1.13586	0.297776	0.471141	0.61821	0	0		serine-rich adhesin for platelets-like, transcript variant X3
AARA21_000508	3338.51	-0.400269	0.757717	0.271453	0.0926557	0.191672	0	0		RNA-binding protein 28
AARA21_000509	2433.22	0.65611	1.57583	0.876015	0.0581502	0.137009	0	0		uncharacterized LOC120896604
AARA21_000510	1649.1	0.0191201	1.01334	0.175709	0.90266	0.93832	0	0		eukaryotic translation initiation factor 2-alpha kinase 1-like, transcript variant X1
AARA21_000511	2562.66	0.427832	1.34521	0.272772	0.0748141	0.164104	0	0		8-oxo-dGDP phosphatase NUDT18, transcript variant X2
AARA21_000512	1131.78	0.118617	1.08569	0.117717	0.304125	0.452757	0	0		uncharacterized LOC120905897
AARA21_000513	4219.56	-0.205482	0.867249	0.229923	0.332273	0.483856	0	0		ETS-like protein pointed, transcript variant X4
AARA21_000514	166.495	-0.502321	0.70597	0.375011	0.087968	0.184617	0	0		IQ and ubiquitin-like domain-containing protein
AARA21_000515	13361.4	0.182799	1.13508	0.28636	0.462001	0.610765	0	0		ELAV-like protein 2, transcript variant X5
AARA21_006567	48.0049	6.25509	76.378	1.94906	2.71335e-05	0.000325072	1	1	up	LOC120895698
AARA21_007232	3.15654	6.25446	76.3447	3.43799	0.000852094	0.00521328	1	1	up	uncharacterized LOC120895550
AARA21_000518	2014.77	0.381995	1.30314	0.258815	0.0920209	0.190727	0	0		zwei Ig domain protein zig-8, transcript variant X1
AARA21_000519	9990.8	-0.0629417	0.95731	0.293726	0.798541	0.874304	0	0		proteasome activator complex subunit 3
AARA21_000520	982.089	-0.270616	0.828966	0.214737	0.171815	0.300522	0	0		pre-mRNA-splicing factor ATP-dependent RNA helicase DHX16
AARA21_000623	97.1996	6.22215	74.6542	0.902886	2.67995e-13	2.94726e-11	1	1	up	uncharacterized LOC120901927
AARA21_000522	2458.28	-0.305433	0.809199	0.168718	0.0594115	0.139244	0	0		dosage compensation regulator, transcript variant X1
AARA21_000523	28398.2	0.111102	1.08005	0.236897	0.608041	0.734409	0	0		CD63 antigen
AARA21_000525	20348.5	-0.138153	0.908681	0.340204	0.611392	0.736544	0	0		heat shock protein 83
AARA21_000526	104.75	-0.972538	0.509609	0.407023	0.00336027	0.0154385	0	0		uncharacterized LOC120898709
AARA21_000527	12178	-0.321386	0.8003	0.285125	0.191263	0.324408	0	0		myb-binding protein 1A
AARA21_000528	141.68	0.846293	1.79788	0.404342	0.00887191	0.0332522	0	0		uncharacterized LOC120906599
AARA21_000529	1286.76	-0.198028	0.871742	0.131269	0.127297	0.241869	0	0		mediator of RNA polymerase II transcription subunit 7
AARA21_002505	67.476	6.21245	74.1538	1.83211	2.37346e-05	0.000291684	1	1	up	prolyl 4-hydroxylase subunit alpha-1-like
AARA21_000531	915.729	-0.479966	0.716995	0.525375	0.139275	0.257886	0	0		cyclin-dependent kinases regulatory subunit
AARA21_000532	7105.75	-0.00348541	0.997587	0.164406	0.982233	0.989103	0	0		ER lumen protein-retaining receptor
AARA21_000533	10752.8	0.277135	1.21179	0.397559	0.350258	0.502146	0	0		CLIP domain-containing serine protease 14D-like
AARA21_000534	1025.18	-0.394216	0.760903	0.533804	0.205376	0.341501	0	0		histone H3
AARA21_000535	1286.19	0.100722	1.07231	0.319313	0.685653	0.795303	0	0		nitric oxide synthase, transcript variant X3
AARA21_000536	3123.19	0.000132893	1.00009	0.27443	0.997826	0.998679	0	0		transmembrane protein 198
AARA21_000537	1126.08	0.171721	1.1264	0.157755	0.255748	0.400329	0	0		netrin receptor unc-5-like, transcript variant X2
AARA21_000538	3280.89	-0.670041	0.628489	0.345197	0.0170186	0.0544315	0	0		RNA polymerase II-associated protein 3, transcript variant X1
AARA21_000539	11.763	0.391616	1.31186	0.573707	0.197838	0.332789	0	0		uncharacterized LOC120894640
AARA21_000540	34.1273	-1.0786	0.473487	0.999943	0.0214379	0.0647703	0	1		uncharacterized LOC120894382, transcript variant X2
AARA21_000542	621.236	-0.152427	0.899736	0.176226	0.365051	0.516677	0	0		putative deoxyribonuclease TATDN1
AARA21_000544	1487.67	-0.00948139	0.99345	0.183537	0.970961	0.982259	0	0		endoplasmic reticulum metallopeptidase 1-like
AARA21_000545	291.665	-0.151157	0.900528	0.302084	0.552989	0.688084	0	0		zinc finger protein 219-like
AARA21_000546	1653.23	-0.0936025	0.93718	0.220369	0.662528	0.77761	0	0		rRNA-processing protein FCF1 homolog
AARA21_009020	171.347	6.01034	64.4603	1.25386	6.94292e-08	2.0396e-06	1	1	up	retinaldehyde-binding protein 1-like
AARA21_000548	5935.95	0.154566	1.11309	0.314808	0.560838	0.694944	0	0		putative ribosome-binding factor A, mitochondrial, transcript variant X1
AARA21_000549	22.6456	0.258633	1.19634	0.478602	0.381279	0.532904	0	0		putative inner dynein arm light chain, axonemal
AARA21_000550	3187.88	-0.526814	0.694086	0.207359	0.00595499	0.0242554	0	0		E3 ubiquitin-protein ligase COP1-like, transcript variant X1
AARA21_000551	4081.22	0.309523	1.2393	0.162411	0.0464554	0.116082	0	0		programmed cell death protein 10
AARA21_000552	2158.09	-0.0260813	0.982084	0.131345	0.838903	0.89899	0	0		peroxisomal membrane protein 11B
AARA21_000553	51.8032	-0.307339	0.808131	0.342858	0.265171	0.410617	0	0		dynein heavy chain 7, axonemal, transcript variant X1
AARA21_000554	499.095	-0.540475	0.687545	0.494116	0.103626	0.207607	0	0		uncharacterized LOC120896743
AARA21_007022	466.946	5.30346	39.4912	0.611188	1.79062e-19	7.67998e-17	1	1	up	beta-1,3-glucan-binding protein-like
AARA21_000556	123.704	1.21004	2.31344	0.553285	0.00351311	0.0159616	0	1		uncharacterized LOC120901045
AARA21_000557	10827.3	-0.533663	0.690799	0.120271	5.34558e-06	8.4188e-05	1	0		uncharacterized LOC120903477, transcript variant X7
AARA21_004261	4.94819	5.90452	59.9016	2.47547	0.000432221	0.00307429	1	1	up	uncharacterized LOC120903656
AARA21_000560	915.489	-0.199052	0.871123	0.357612	0.495386	0.640423	0	0		putative tRNA pseudouridine synthase Pus10
AARA21_000561	1.81129	0.198158	1.14723	0.607079	0.12283	0.235082	0	0		uncharacterized LOC120901246
AARA21_000562	2587.21	0.241561	1.18227	0.267817	0.306868	0.455804	0	0		uncharacterized LOC120908893, transcript variant X8
AARA21_000563	2500.59	-0.077034	0.948005	0.245935	0.745886	0.839384	0	0		aminopeptidase N
AARA21_000564	2289.19	-0.0649025	0.95601	0.134153	0.645904	0.765412	0	0		cell division control protein 1-like
AARA21_000566	881.359	0.0070738	1.00492	0.138269	0.960801	0.975799	0	0		telomere length and silencing protein 1 homolog
AARA21_000567	453.049	-0.206242	0.866792	0.300779	0.417133	0.566763	0	0		transmembrane protein 141
AARA21_010203	59.5063	5.87599	58.7286	1.24142	8.43758e-08	2.41796e-06	1	1	up	uncharacterized LOC120905066
AARA21_000569	1304.97	0.0491593	1.03466	0.228939	0.816421	0.884474	0	0		gamma-aminobutyric acid receptor subunit beta-like, transcript variant X1
AARA21_000570	252.701	0.502754	1.41692	0.311887	0.0583792	0.137425	0	0		uncharacterized LOC120903741
AARA21_000571	16.3641	-0.152331	0.899796	0.490419	0.572893	0.704792	0	0		odorant receptor 67d-like
AARA21_013114	44.491	5.85022	57.6888	1.02798	5.16717e-10	2.587e-08	1	1	up	apolipoprotein D-like
AARA21_000575	182.964	-0.766378	0.587891	0.292319	0.0028902	0.0137175	0	0		zinc finger protein 253-like
AARA21_000576	1703.82	-0.403072	0.756246	0.219271	0.0464615	0.116082	0	0		beta-catenin-like protein 1
AARA21_000577	937.085	-0.165332	0.891723	0.248774	0.444041	0.593238	0	0		cytoplasmic tRNA 2-thiolation protein 1
AARA21_000578	623.604	0.421585	1.3394	0.321654	0.114403	0.222763	0	0		elongation of very long chain fatty acids protein AAEL008004-like, transcript variant X2
AARA21_011856	1616.27	5.21857	37.2344	0.690405	2.01677e-15	3.41444e-13	1	1	up	protein obstructor-E, transcript variant X2
AARA21_000580	5008.64	0.363502	1.28655	0.495098	0.243945	0.386712	0	0		sodium-coupled monocarboxylate transporter 1, transcript variant X5
AARA21_000581	1901.21	-0.0605005	0.958931	0.1079	0.570219	0.703048	0	0		m7GpppN-mRNA hydrolase
AARA21_000582	1833.86	-0.545139	0.685325	0.294287	0.0324746	0.0882394	0	0		ubiquitin-like domain-containing CTD phosphatase 1
AARA21_000583	161.753	-0.436538	0.738905	0.182855	0.0106691	0.0382288	0	0		sin3 histone deacetylase corepressor complex component SDS3-like
AARA21_000584	5948.28	-0.327762	0.796772	0.16246	0.0345837	0.0923212	0	0		ubiquitin carboxyl-terminal hydrolase 20
AARA21_000585	2327.61	0.23918	1.18032	0.255586	0.292437	0.440034	0	0		potassium voltage-gated channel protein Shaw, transcript variant X9
AARA21_000586	5178.86	0.441659	1.35817	0.290643	0.078993	0.171141	0	0		prolyl endopeptidase FAP, transcript variant X1
AARA21_000589	2170.72	-0.123313	0.918077	0.252567	0.575598	0.7067	0	0		ER lumen protein-retaining receptor-like, transcript variant X2
AARA21_000591	12135.6	-0.109057	0.927194	0.212617	0.578211	0.708758	0	0		AP-1 complex subunit gamma-1, transcript variant X2
AARA21_000593	1272.95	0.371381	1.29359	0.169538	0.0214977	0.064895	0	0		ubiquinone biosynthesis monooxygenase COQ6, mitochondrial, transcript variant X1
AARA21_000594	14488.5	0.00986626	1.00686	0.249504	0.968303	0.980341	0	0		cytoplasmic aconitate hydratase-like
AARA21_000595	34127	0.315913	1.2448	0.279832	0.196201	0.330694	0	0		transforming growth factor-beta-induced protein ig-h3, transcript variant X1
AARA21_000596	928.355	0.432648	1.34971	0.23943	0.0462544	0.115654	0	0		ribonuclease P protein subunit p25-like protein, transcript variant X4
AARA21_000597	1323.6	0.525381	1.43931	0.422875	0.0942458	0.194243	0	0		aminopeptidase N-like
AARA21_000598	4628.23	-0.136697	0.909599	0.175998	0.412241	0.562755	0	0		box A-binding factor-like, transcript variant X3
AARA21_000600	2199.88	-0.47726	0.71834	0.308207	0.067929	0.153395	0	0		uncharacterized LOC120904508
AARA21_000601	4516.28	0.0556616	1.03934	0.108754	0.601607	0.729033	0	0		uncharacterized LOC120905187
AARA21_000603	3030.16	0.0686498	1.04873	0.259598	0.761266	0.849507	0	0		uncharacterized LOC120905625
AARA21_000605	29.0989	0.0732197	1.05206	0.485582	0.782187	0.863675	0	0		uncharacterized LOC120903501
AARA21_010946	42.7774	5.77976	54.9389	1.18191	4.64023e-08	1.4318e-06	1	1	up	uncharacterized LOC120904841, transcript variant X2
AARA21_000608	3955.87	-0.448549	0.732779	0.256335	0.049199	0.121087	0	0		dnaJ homolog subfamily C member 16
AARA21_012226	1104.26	5.72243	52.7985	1.06756	3.81128e-09	1.57709e-07	1	1	up	trypsin-6
AARA21_000610	8997.95	-0.0830332	0.944071	0.166079	0.619678	0.743164	0	0		coatomer subunit beta', transcript variant X1
AARA21_000611	316.727	0.775859	1.71221	0.422006	0.0184199	0.0577506	0	0		uncharacterized LOC120897278
AARA21_000612	5596.26	0.000446664	1.00031	0.105479	0.951927	0.969975	0	0		26S proteasome non-ATPase regulatory subunit 7
AARA21_000613	788.849	0.460782	1.37629	0.158769	0.00233652	0.0115898	0	0		protein lin-52 homolog
AARA21_000614	2027	0.897729	1.86313	0.233093	3.11585e-05	0.000365466	1	0		mitochondrial thiamine pyrophosphate carrier-like
AARA21_000615	6075.88	0.320125	1.24844	0.101637	0.00108856	0.00631777	1	0		ER membrane protein complex subunit 3
AARA21_000616	2637.68	-0.0391218	0.973247	0.128002	0.741902	0.837006	0	0		rab proteins geranylgeranyltransferase component A
AARA21_000617	942.883	-0.0770384	0.948002	0.142294	0.582035	0.712086	0	0		septin-interacting protein 1
AARA21_003850	425.858	5.01066	32.2374	0.512783	7.03082e-24	6.46182e-21	1	1	up	transcriptional regulator ovo-like
AARA21_000619	737.554	0.398785	1.3184	0.135594	0.00247819	0.0121613	0	0		fringe glycosyltransferase
AARA21_000620	1954.67	0.0765577	1.0545	0.236408	0.751474	0.843216	0	0		protocadherin-like wing polarity protein stan, transcript variant X1
AARA21_000621	2599.37	0.277295	1.21192	0.13846	0.0385123	0.100739	0	0		trafficking protein particle complex subunit 2-like protein, transcript variant X1
AARA21_012322	27.4873	4.89893	29.8349	0.783022	2.9528e-11	2.06488e-09	1	1	up	glucose dehydrogenase [FAD, quinone]-like, transcript variant X1
AARA21_005728	11.4111	5.66511	50.742	1.86444	7.21609e-05	0.000717538	1	1	up	titin-like
AARA21_000624	14928.2	-0.0304511	0.979114	0.113389	0.782865	0.864052	0	0		peptidyl-prolyl cis-trans isomerase FKBP8
AARA21_002150	65.3186	4.81802	28.2078	1.40583	2.3262e-05	0.000286972	1	1	up	DE-cadherin-like
AARA21_000626	1793.31	0.0120858	1.00841	0.233832	0.948465	0.96768	0	0		mitochondrial intermediate peptidase
AARA21_000628	220.021	0.94495	1.92512	0.320903	0.000739624	0.00465822	1	0		uncharacterized LOC120905636
AARA21_000629	2333.41	0.412916	1.33137	0.208502	0.0317877	0.0869129	0	0		carcinine transporter-like
AARA21_014108	80.8917	4.79306	27.7239	1.18044	1.51699e-06	2.85785e-05	1	1	up	probable chitinase 10
AARA21_000631	7.35534	-0.391133	0.762531	0.698834	0.112735	0.220417	0	0		uncharacterized LOC120901078
AARA21_000633	1612.91	0.466099	1.38137	0.340316	0.0955199	0.195932	0	0		uncharacterized LOC120893605, transcript variant X3
AARA21_000634	7333.19	0.254257	1.19272	0.0883471	0.00557764	0.0230319	0	0		uncharacterized LOC120905004
AARA21_000637	2817.74	-0.30348	0.810295	0.299282	0.240188	0.382439	0	0		uncharacterized LOC120900345
AARA21_000638	1828.55	0.0409402	1.02878	0.136182	0.746392	0.839716	0	0		brain protein I3
AARA21_000639	2109.02	-0.955655	0.515607	0.339379	0.0010812	0.00628074	1	0		flocculation protein FLO11-like
AARA21_012300	92.4556	5.62163	49.2357	1.04576	3.07767e-09	1.29413e-07	1	1	up	endoplasmic reticulum metallopeptidase 1-like
AARA21_000872	5.33787	4.76861	27.2581	2.4453	0.000455688	0.00319006	1	1	up	LOC120894074
AARA21_000642	22.2891	1.22941	2.34471	1.2352	0.0155409	0.0508169	0	1		uncharacterized LOC120906287
AARA21_000643	4402.25	0.16649	1.12232	0.256708	0.46916	0.616429	0	0		trithorax group protein osa, transcript variant X2
AARA21_007653	34.8398	4.75485	26.9993	0.903013	6.58935e-09	2.61683e-07	1	1	up	LOC120894301
AARA21_000645	4.38561	0.52088	1.43483	0.727637	0.0952896	0.195674	0	0		LOC120907712
AARA21_000646	5754.53	0.166946	1.12268	0.456796	0.563731	0.697296	0	0		beta-alanine transporter-like
AARA21_000647	1015.93	0.00616038	1.00428	0.406625	0.98973	0.993824	0	0		insulin-like growth factor-binding protein complex acid labile subunit
AARA21_000649	11199	0.291962	1.2243	0.210231	0.134707	0.251819	0	0		heat shock protein 75 kDa, mitochondrial
AARA21_000650	46563.8	0.358629	1.28221	0.346643	0.201264	0.336364	0	0		low-density lipoprotein receptor-related protein 4, transcript variant X1
AARA21_000651	5.51492	-0.387033	0.7647	0.639291	0.170877	0.299547	0	0		uncharacterized LOC120894692
AARA21_000653	2969.46	0.182731	1.13503	0.124282	0.12288	0.235107	0	0		28S ribosomal protein S31, mitochondrial
AARA21_000654	705.298	0.796636	1.73705	0.234443	0.000229709	0.00185308	1	0		hyaluronidase Tab y 2.0101-like, transcript variant X6
AARA21_000655	93264.2	0.315238	1.24422	0.208003	0.103092	0.206973	0	0		60S ribosomal protein L39
AARA21_000656	8.09906	1.7122	3.27659	2.56961	0.00828144	0.0313908	0	1		glucose dehydrogenase [FAD, quinone]-like
AARA21_000657	581.915	0.0628401	1.04452	0.203434	0.75669	0.846049	0	0		uncharacterized LOC120897361
AARA21_000658	4477.24	0.336137	1.26237	0.311069	0.198766	0.333619	0	0		Fc receptor-like protein 5, transcript variant X1
AARA21_000659	1514.56	-0.183997	0.880261	0.134582	0.163889	0.290867	0	0		protein hunchback
AARA21_000660	38509.2	0.944874	1.92502	0.453761	0.00759081	0.0293042	0	0		delta-1-pyrroline-5-carboxylate synthase
AARA21_000661	14488.4	-0.599346	0.660053	0.17176	0.00024265	0.00193924	1	0		protein piccolo, transcript variant X10
AARA21_000662	11.8659	0.207398	1.1546	0.506428	0.447384	0.596484	0	0		odorant receptor 82a-like
AARA21_014545	129.636	5.52115	45.9231	0.936522	1.3363e-10	7.78018e-09	1	1	up	uncharacterized LOC120904831
AARA21_000664	1924.31	0.381774	1.30294	0.255508	0.094384	0.194435	0	0		uncharacterized LOC120906370
AARA21_000667	874.069	0.460766	1.37627	0.195227	0.0119473	0.0417017	0	0		39S ribosomal protein L55, mitochondrial
AARA21_000668	3.78681	-0.0624943	0.957607	0.542154	0.70661	0.811297	0	0		uncharacterized LOC120901085
AARA21_000669	18501.3	-0.342769	0.788527	0.193393	0.0631624	0.145438	0	0		oxysterol-binding protein 1, transcript variant X1
AARA21_000670	2.60392	-0.163005	0.893163	0.585482	0.412291	0.562755	0	0		large subunit ribosomal RNA
AARA21_001165	1259.17	4.75112	26.9296	1.41709	1.45568e-05	0.000196334	1	1	up	LOC120908218
AARA21_000672	1642.84	0.263408	1.20031	0.392559	0.369236	0.520824	0	0		proton-associated sugar transporter A-like
AARA21_000675	17.6507	-1.22727	0.427125	0.614256	0.00523731	0.0218866	0	1		uncharacterized LOC120903722
AARA21_000676	1788.05	0.151416	1.11066	0.480967	0.590968	0.719393	0	0		integumentary mucin C.1-like
AARA21_000677	727.659	-0.202019	0.869333	0.155405	0.172533	0.301342	0	0		myosin heavy chain, striated muscle-like, transcript variant X1
AARA21_003601	208.676	4.71779	26.3146	0.955113	2.60751e-08	8.73721e-07	1	1	up	probable chitinase 10
AARA21_000680	2202.11	0.220027	1.16476	0.35345	0.456274	0.604746	0	0		headcase protein-like
AARA21_000683	5309.06	-0.159952	0.895055	0.185055	0.347992	0.500181	0	0		E3 ubiquitin-protein ligase TM129, transcript variant X1
AARA21_015619	58.0644	4.68894	25.7936	1.16219	1.93293e-06	3.49705e-05	1	1	up	bile salt-activated lipase-like
AARA21_000686	25487.1	-0.147865	0.902585	0.281899	0.542453	0.680187	0	0		importin subunit beta, transcript variant X1
AARA21_000687	571.732	0.205163	1.15282	0.190616	0.252381	0.396701	0	0		uncharacterized LOC120905158
AARA21_000688	6545.87	0.233394	1.1756	0.353697	0.408498	0.559701	0	0		probable N-acetyltransferase san
AARA21_000689	629.394	-0.509361	0.702533	0.281367	0.038595	0.100935	0	0		zinc finger protein 93-like
AARA21_002353	50.9759	5.34687	40.6975	1.10001	4.49096e-08	1.39241e-06	1	1	up	esterase E4-like
AARA21_000692	1240.12	-0.04143	0.971691	0.238646	0.831247	0.894383	0	0		serine protease grass-like, transcript variant X1
AARA21_006591	193.451	4.60614	24.3549	0.85241	2.19081e-09	9.62086e-08	1	1	up	venom serine protease inhibitor-like
AARA21_000694	2129.61	-0.274987	0.826458	0.142188	0.0451471	0.113454	0	0		N6-adenosine-methyltransferase non-catalytic subunit
AARA21_000695	11453.5	-0.00160165	0.99889	0.168381	0.986832	0.992075	0	0		HEAT repeat-containing protein 5B, transcript variant X4
AARA21_000696	6.70042	0.40945	1.32818	0.698053	0.106057	0.211114	0	0		adenosine deaminase 2-like
AARA21_000698	568.169	0.103149	1.07412	0.253065	0.649945	0.768644	0	0		beta-1,3-glucan-binding protein 2-like
AARA21_000699	1113.87	0.711932	1.638	0.245545	0.00141819	0.00779987	1	0		uncharacterized LOC120894432
AARA21_000700	244.903	-0.152697	0.899567	0.336562	0.572845	0.704792	0	0		ATP synthase lipid-binding protein, mitochondrial-like, transcript variant X1
AARA21_000701	85.4628	-0.254108	0.838505	0.315356	0.340153	0.491754	0	0		uncharacterized LOC120897462, transcript variant X1
AARA21_000702	1459.63	-0.474667	0.719633	0.228163	0.0229499	0.0679312	0	0		alanine--tRNA ligase, mitochondrial
AARA21_000703	2747.21	-0.396402	0.759751	0.181557	0.0203498	0.062358	0	0		RUS family member 1
AARA21_000706	83.9493	-0.153084	0.899326	0.4242	0.592013	0.720392	0	0		uncharacterized protein K02A2.6-like
AARA21_000707	1622.57	0.0693179	1.04922	0.160224	0.654904	0.772376	0	0		mitochondrial inner membrane protease subunit 2
AARA21_000708	44258	0.109616	1.07894	0.156894	0.468557	0.616014	0	0		supervillin, transcript variant X3
AARA21_000709	378.934	0.492087	1.40648	0.368992	0.0939017	0.193782	0	0		dynein regulatory complex subunit 5
AARA21_000712	6826	-0.432033	0.741217	0.207967	0.0222766	0.0664888	0	0		probable E3 ubiquitin-protein ligase HERC2, transcript variant X2
AARA21_000713	7149.44	0.10202	1.07328	0.108096	0.337024	0.488453	0	0		protein diaphanous
AARA21_000716	2732.32	-0.109406	0.92697	0.194397	0.547118	0.683833	0	0		sphingosine-1-phosphate phosphatase 1-like
AARA21_000717	2784.55	-0.29918	0.812714	0.246552	0.184555	0.316116	0	0		mediator of RNA polymerase II transcription subunit 21
AARA21_000718	1674.04	0.075384	1.05364	0.153189	0.6265	0.74918	0	0		BTB/POZ domain-containing protein 9
AARA21_000719	940.437	0.155476	1.11379	0.286181	0.530674	0.671174	0	0		inhibin beta chain
AARA21_000720	14.1027	0.387796	1.30839	0.67393	0.126004	0.239836	0	0		uncharacterized LOC120894797, transcript variant X1
AARA21_000721	3774.8	0.578814	1.49362	0.306979	0.0279578	0.0790274	0	0		progestin and adipoQ receptor family member 4, transcript variant X3
AARA21_000722	13148.8	0.136544	1.09927	0.223428	0.507966	0.651775	0	0		tyrosine-protein kinase Src42A, transcript variant X6
AARA21_000723	66.5995	-0.307778	0.807885	0.415237	0.302786	0.451286	0	0		uncharacterized LOC120908335
AARA21_000724	13363.3	0.103034	1.07403	0.116216	0.365751	0.51744	0	0		uncharacterized LOC120897761
AARA21_000725	26.136	0.548974	1.46305	0.730813	0.0935115	0.193163	0	0		esterase E4-like
AARA21_000726	184.753	0.00104199	1.00072	0.397532	0.997805	0.998679	0	0		structural maintenance of chromosomes protein 3-like
AARA21_000727	1927.55	-0.230953	0.852072	0.152344	0.115248	0.224003	0	0		deoxynucleoside kinase, transcript variant X2
AARA21_000728	1457.8	-0.526011	0.694472	0.132566	4.46086e-05	0.00048519	1	0		cleavage and polyadenylation specificity factor subunit 1, transcript variant X2
AARA21_000730	1234.93	0.197835	1.14698	0.181268	0.261046	0.405906	0	0		protein KRTCAP2 homolog
AARA21_000731	2756.89	0.24218	1.18278	0.275335	0.315577	0.465764	0	0		LIM/homeobox protein Lhx1
AARA21_000732	2654.74	-0.280058	0.823558	0.155222	0.0606401	0.141223	0	0		palmitoyltransferase ZDHHC3-A
AARA21_000734	25812.9	0.437387	1.35415	0.181392	0.01077	0.0384747	0	0		ankyrin-3, transcript variant X3
AARA21_000735	12653.8	-0.431491	0.741495	0.187788	0.0143573	0.0478464	0	0		serine palmitoyltransferase 1
AARA21_000736	4630.73	-0.0636947	0.956811	0.237605	0.765714	0.852878	0	0		gremlin-1-like, transcript variant X4
AARA21_000738	14608.9	-0.302211	0.811009	0.145002	0.0305836	0.084428	0	0		serine/threonine-protein kinase N, transcript variant X3
AARA21_000739	3541.82	0.137067	1.09967	0.19683	0.45892	0.60769	0	0		uncharacterized LOC120893626
AARA21_000740	42.7266	0.0104471	1.00727	0.388675	0.97738	0.986244	0	0		uncharacterized LOC120906289, transcript variant X2
AARA21_000741	283657	-0.0244615	0.983188	0.261826	0.911432	0.943487	0	0		translationally-controlled tumor protein homolog
AARA21_000743	6809.66	0.501369	1.41556	0.212811	0.0109981	0.039135	0	0		outer mitochondrial transmembrane helix translocase
AARA21_000744	1027.73	0.924101	1.8975	0.358826	0.00219249	0.0110026	0	0		UDP-glucosyltransferase 2-like
AARA21_000745	15.33	-0.320693	0.800685	0.547999	0.261809	0.40675	0	0		pickpocket protein 28-like
AARA21_000746	7580.42	0.693732	1.61746	0.329203	0.0128479	0.043943	0	0		protein toll-like, transcript variant X2
AARA21_000747	18.5832	0.727646	1.65594	0.853659	0.050517	0.123363	0	0		elongation of very long chain fatty acids protein 4
AARA21_000748	12.8093	-0.0126716	0.991255	0.46175	0.961978	0.976613	0	0		uncharacterized LOC120902617, transcript variant X1
AARA21_000749	2140.49	1.16051	2.23537	0.48727	0.00246037	0.0120923	0	1		ATP-binding cassette sub-family A member 3-like
AARA21_000750	26.2069	0.277961	1.21248	0.371849	0.337842	0.489363	0	0		uncharacterized LOC120896437
AARA21_000751	3.85773	0.546272	1.46031	0.747677	0.0865846	0.182517	0	0		uncharacterized LOC120902847
AARA21_000752	6753.23	-0.0358757	0.975439	0.235379	0.864326	0.915683	0	0		mucin-5AC, transcript variant X4
AARA21_000754	7288.89	0.00437576	1.00304	0.238723	0.986366	0.991762	0	0		uncharacterized LOC120900629, transcript variant X1
AARA21_000755	1145.32	0.565416	1.47981	0.17673	0.000773839	0.00482178	1	0		uncharacterized LOC120899628
AARA21_000757	4.17986	0.191444	1.14191	0.570045	0.348603	0.500555	0	0		uncharacterized LOC120906086
AARA21_000758	1947.13	-0.464199	0.724874	0.188951	0.00862188	0.0324569	0	0		arfaptin-2, transcript variant X4
AARA21_000759	15734.8	0.15876	1.11633	0.13083	0.212756	0.350561	0	0		mucin-5AC, transcript variant X1
AARA21_000761	1.54393	0.0541891	1.03828	0.549482	0.761912	0.849894	0	0		uncharacterized LOC120894453
AARA21_000762	830.66	-0.387801	0.764294	0.176861	0.020798	0.0632827	0	0		mediator of RNA polymerase II transcription subunit 11
AARA21_000763	3797.08	0.348706	1.27342	0.101582	0.000480101	0.00332479	1	0		max-like protein X, transcript variant X1
AARA21_000764	562.723	0.299153	1.23042	0.213354	0.129914	0.245571	0	0		uncharacterized protein DDB_G0271670-like
AARA21_000765	5.4822	-0.354058	0.78238	0.705559	0.061064	0.141748	0	0		uncharacterized LOC120903878
AARA21_000766	1308.74	-0.318919	0.80167	0.274076	0.183824	0.315415	0	0		WD repeat and HMG-box DNA-binding protein 1
AARA21_000767	2766.46	-0.304065	0.809967	0.17494	0.0609977	0.141697	0	0		dentin sialophosphoprotein, transcript variant X5
AARA21_008210	441.662	5.25304	38.135	1.30042	2.24102e-06	3.95545e-05	1	1	up	hexamerin-1.1-like, transcript variant X2
AARA21_000769	527.093	-0.0882995	0.940631	0.204215	0.63452	0.75624	0	0		cap-specific mRNA (nucleoside-2'-O-)-methyltransferase 2
AARA21_000770	631.584	-0.0540317	0.963241	0.186984	0.757614	0.846743	0	0		5-methylcytosine rRNA methyltransferase NSUN4
AARA21_000771	4601.48	-0.0709265	0.952026	0.147359	0.623853	0.746778	0	0		G-protein-signaling modulator 2
AARA21_000772	28.0728	0.214746	1.1605	0.475161	0.450984	0.599712	0	0		uncharacterized LOC120898016
AARA21_015164	6141.06	4.58101	23.9343	0.470168	8.81919e-24	7.09228e-21	1	1	up	probable cytochrome P450 6a14
AARA21_000774	100020	0.555499	1.46968	0.669266	0.106528	0.211821	0	0		trypsin-1-like
AARA21_000775	16.4009	0.117255	1.08467	0.457728	0.666098	0.780145	0	0		ionotropic receptor 75a-like
AARA21_000778	11.8672	0.80787	1.75063	0.752393	0.0409698	0.105601	0	0		LOC120907715
AARA21_000780	4203.54	-0.416542	0.749218	0.191136	0.0200998	0.0617675	0	0		uncharacterized LOC120908896, transcript variant X5
AARA21_012538	786.447	5.2177	37.2121	1.26523	1.26987e-06	2.4695e-05	1	1	up	C-type lectin 37Db-like
AARA21_000784	4094.38	-0.244654	0.844018	0.165291	0.123393	0.235879	0	0		putative uncharacterized protein DDB_G0271606
AARA21_000785	25065.3	-0.715965	0.608798	0.209367	0.000244162	0.00195012	1	0		PTB domain-containing adapter protein ced-6, transcript variant X1
AARA21_000786	4834.18	-0.302302	0.810957	0.313211	0.270222	0.416101	0	0		medium-chain acyl-CoA ligase ACSF2, mitochondrial
AARA21_000787	6388.65	-0.581037	0.668483	0.18937	0.00109957	0.00636664	1	0		serrate RNA effector molecule homolog, transcript variant X2
AARA21_000788	776.281	-0.257299	0.836653	0.294567	0.311197	0.460568	0	0		relaxin receptor 2-like, transcript variant X1
AARA21_000789	3402.06	-0.107078	0.928467	0.162143	0.488635	0.634564	0	0		anamorsin homolog
AARA21_000790	5237.49	-0.608305	0.655967	0.371685	0.0340529	0.0913212	0	0		protein KRI1 homolog
AARA21_000791	27.5957	-1.22987	0.426356	0.569732	0.00333183	0.0153442	0	1		uncharacterized LOC120897046
AARA21_000792	6000.95	0.296588	1.22824	0.188545	0.104942	0.209445	0	0		mitochondrial glutamate carrier 1-like, transcript variant X3
AARA21_000793	2588.13	0.770146	1.70544	0.307703	0.00385765	0.017199	0	0		uncharacterized LOC120905192
AARA21_000794	14.9482	1.53161	2.89109	1.00306	0.0062405	0.0251398	0	1		uncharacterized LOC120894885
AARA21_000795	3181.37	-0.4572	0.728399	0.143528	0.000886284	0.00535894	1	0		cytochrome c oxidase assembly protein COX15 homolog, transcript variant X1
AARA21_000796	569.041	-0.247737	0.842216	0.212562	0.206374	0.342768	0	0		DNA-binding protein SMUBP-2
AARA21_000798	4489.75	0.259193	1.19681	0.489096	0.375136	0.526584	0	0		protein I'm not dead yet-like
AARA21_000799	1180.19	0.28559	1.21891	0.217512	0.155304	0.27956	0	0		uncharacterized LOC120905563
AARA21_000800	17.3359	0.715264	1.64178	0.664586	0.0554116	0.132132	0	0		chromatin modification-related protein eaf-1-like
AARA21_000801	2465.46	0.128799	1.09338	0.29736	0.613083	0.737859	0	0		Down syndrome cell adhesion molecule-like protein Dscam2, transcript variant X5
AARA21_000804	20367.1	-0.576555	0.670563	0.432752	0.0711822	0.158214	0	0		angiotensin-converting enzyme-like
AARA21_000805	5454.42	0.427512	1.34491	0.37047	0.139564	0.258201	0	0		hemicentin-1-like
AARA21_000806	9147.99	0.0512748	1.03618	0.146062	0.732719	0.829701	0	0		transient receptor potential cation channel trpm, transcript variant X17
AARA21_011634	7.78659	4.48271	22.3578	1.36357	5.95279e-05	0.000613738	1	1	up	general odorant-binding protein 99b-like
AARA21_000809	54316.6	0.237023	1.17856	0.243082	0.281776	0.428357	0	0		guanine nucleotide-binding protein G(q) subunit alpha, transcript variant X3
AARA21_000810	8756.93	-0.167001	0.890692	0.137493	0.209551	0.346751	0	0		DET1- and DDB1-associated protein 1
AARA21_000811	8.45857	0.660726	1.58088	1.07724	0.0290909	0.0812839	0	0		uncharacterized LOC120897316
AARA21_000812	13.0611	0.28243	1.21624	0.629817	0.156187	0.280875	0	0		uncharacterized LOC120903233
AARA21_000813	3454.3	-0.553971	0.681143	0.284605	0.0250989	0.0728003	0	0		uncharacterized LOC120893922
AARA21_013477	3041.4	4.42172	21.4323	0.593721	4.51301e-15	7.08158e-13	1	1	up	probable cytochrome P450 6a14
AARA21_013970	4235.03	5.15915	35.7321	0.40646	3.74515e-38	2.40944e-34	1	1	up	proton-coupled amino acid transporter-like protein pathetic, transcript variant X2
AARA21_000817	2429.23	-0.0295525	0.979724	0.172261	0.848883	0.905086	0	0		protein cereblon, transcript variant X2
AARA21_000818	621.898	0.213821	1.15976	0.314248	0.416418	0.56615	0	0		homeobox protein unc-4-like, transcript variant X2
AARA21_003717	9.42576	5.15306	35.5815	1.96956	0.0002576	0.00203222	1	1	up	involucrin-like
AARA21_000820	1323.32	-0.250201	0.840779	0.24327	0.254144	0.398546	0	0		diuretic hormone receptor-like, transcript variant X9
AARA21_000821	24604.5	0.0597437	1.04228	0.385711	0.834378	0.896305	0	0		uncharacterized LOC120894351
AARA21_008881	129.63	5.08331	33.9022	1.59542	4.10959e-05	0.000452723	1	1	up	carboxypeptidase B-like
AARA21_008373	8.08707	5.05233	33.1821	2.05616	0.000340866	0.00255788	1	1	up	uncharacterized LOC120897207
AARA21_000824	57.2837	0.627414	1.54479	0.414943	0.0466094	0.116248	0	0		homeobox protein goosecoid-like, transcript variant X2
AARA21_000825	1230.52	-0.352066	0.783462	0.457832	0.262855	0.407931	0	0		juvenile hormone esterase-like, transcript variant X1
AARA21_000827	1972.36	-0.932995	0.52377	0.615917	0.0204954	0.0626883	0	0		uncharacterized LOC120896152
AARA21_000828	2980.01	-0.320002	0.801069	0.110978	0.00327094	0.015109	0	0		putative elongator complex protein 4, transcript variant X3
AARA21_015269	23.5516	5.04441	33.0004	1.33906	6.01865e-06	9.30793e-05	1	1	up	cell wall integrity and stress response component 2-like
AARA21_000831	839.241	-0.0540078	0.963257	0.263694	0.828816	0.893314	0	0		bolA-like protein 2
AARA21_000832	15.9818	0.60483	1.5208	0.619045	0.0856948	0.181176	0	0		myrosinase-binding protein 2-like
AARA21_000833	34985.3	0.140285	1.10212	0.205103	0.464855	0.613088	0	0		uncharacterized LOC120904791, transcript variant X1
AARA21_000834	19649.5	-0.554169	0.681049	0.360324	0.0468274	0.116566	0	0		protein slender lobes
AARA21_000835	4022.65	0.211017	1.1575	0.2609	0.363847	0.515597	0	0		toll-like receptor 7
AARA21_000836	86.7134	0.127758	1.09259	0.321199	0.631615	0.753791	0	0		uncharacterized LOC120904239
AARA21_000837	2922.59	0.254136	1.19262	0.269252	0.284206	0.431388	0	0		otoferlin-like
AARA21_000839	2231	-0.481677	0.716145	0.202456	0.0104845	0.0376933	0	0		uncharacterized LOC120893355
AARA21_000840	75.4956	0.426802	1.34425	0.367313	0.141529	0.261009	0	0		barH-like 1 homeobox protein
AARA21_000842	1434.07	-0.0966649	0.935192	0.136048	0.491295	0.636886	0	0		protein PRRC1-like
AARA21_000843	1948.98	0.215161	1.16083	0.233166	0.311846	0.461315	0	0		enoyl-CoA delta isomerase 2
AARA21_000844	1652.19	0.785778	1.72402	0.336821	0.00597955	0.024317	0	0		uncharacterized LOC120908651
AARA21_000845	248.463	1.18	2.26578	0.557661	0.00427469	0.0186323	0	1		facilitated trehalose transporter Tret1-like
AARA21_000847	9154.63	-0.265037	0.832177	0.141642	0.0495195	0.121736	0	0		E3 ubiquitin-protein ligase MYLIP-A
AARA21_000848	20457.8	0.0597605	1.04229	0.194891	0.7404	0.835972	0	0		eukaryotic translation initiation factor 2A
AARA21_000852	5526.1	-0.628877	0.64668	0.272121	0.0103894	0.0375079	0	0		MFS-type transporter SLC18B1-like
AARA21_000853	17693.8	-0.603479	0.658165	0.310693	0.0226931	0.0674035	0	0		acyl-CoA-binding protein
AARA21_000854	8266.48	0.375513	1.2973	0.252048	0.0954112	0.195833	0	0		serine-rich adhesin for platelets, transcript variant X1
AARA21_000856	396.115	-0.102243	0.931584	0.211634	0.610943	0.736453	0	0		intraflagellar transport protein 43 homolog
AARA21_000857	1579.33	-0.190589	0.876248	0.256174	0.410196	0.560952	0	0		hemicentin-1, transcript variant X1
AARA21_000859	3610.72	-0.560237	0.678191	0.233952	0.00688254	0.027215	0	0		enoyl-CoA hydratase domain-containing protein 3, mitochondrial
AARA21_000860	3.87888	0.244561	1.18473	0.551585	0.347835	0.50007	0	0		uncharacterized LOC120905695
AARA21_000861	5.68162	0.0594583	1.04207	0.509633	0.790959	0.869481	0	0		LOC120907856
AARA21_000862	95.6004	0.69326	1.61693	0.468812	0.0409398	0.105586	0	0		tectonic
AARA21_000863	5.83188	0.000552803	1.00038	0.52548	0.993952	0.996896	0	0		homeotic protein female sterile-like
AARA21_000864	3586.14	-0.510002	0.702221	0.246926	0.0211807	0.0641402	0	0		kinesin-like protein costa
AARA21_000865	12.5482	0.159293	1.11674	0.50109	0.542061	0.679895	0	0		protein PELPK1-like
AARA21_000866	25.3189	-1.15955	0.447653	0.73403	0.0103769	0.0374843	0	1		uncharacterized LOC120905956, transcript variant X2
AARA21_000868	7181.59	0.717897	1.64478	0.312492	0.00784448	0.0300223	0	0		uncharacterized LOC120894725, transcript variant X3
AARA21_000869	10.8478	1.21918	2.32814	0.729362	0.010286	0.0372608	0	1		uncharacterized LOC120903681
AARA21_000870	1297.55	-0.12911	0.914396	0.215646	0.545116	0.68243	0	0		uncharacterized LOC120894314
AARA21_000871	33.4012	-1.70472	0.306782	1.67673	0.00836361	0.0316514	0	1		uncharacterized LOC120902730
AARA21_014141	1655.65	4.39876	21.0939	1.19861	8.86276e-06	0.000129294	1	1	up	cuticle protein 10.6-like
AARA21_000873	11479.1	-0.510806	0.70183	0.113051	2.58719e-06	4.49857e-05	1	0		transport and Golgi organization protein 1, transcript variant X1
AARA21_000874	25044.4	0.984802	1.97904	0.45648	0.00588143	0.0240319	0	0		uncharacterized LOC120895874, transcript variant X2
AARA21_000875	17.7828	0.109473	1.07883	0.426418	0.707249	0.811791	0	0		polyserase-2-like
AARA21_000876	13853.6	-0.349976	0.784597	0.173303	0.0343386	0.0918742	0	0		U1 small nuclear ribonucleoprotein 70 kDa
AARA21_000877	1684.49	-0.285243	0.820603	0.245083	0.195014	0.329081	0	0		histone H4 transcription factor-like
AARA21_000882	546.664	-0.323897	0.798909	0.218553	0.104219	0.208454	0	0		40-kDa huntingtin-associated protein
AARA21_000883	1.40445	-0.268265	0.830317	0.642613	0.0859067	0.181403	0	0		uncharacterized LOC120894262
AARA21_000886	1172.59	-0.678797	0.624686	0.25211	0.00295757	0.0139754	0	0		LOC120900008
AARA21_000887	4160.32	-0.0140174	0.990331	0.128395	0.909333	0.94206	0	0		cysteine--tRNA ligase, cytoplasmic
AARA21_000888	9489.69	-0.186238	0.878895	0.103191	0.0690244	0.15516	0	0		protein draper, transcript variant X2
AARA21_000889	29.8922	0.64302	1.56159	0.67685	0.0726639	0.160841	0	0		LOC120907778
AARA21_000890	8993.19	-0.296629	0.814153	0.210274	0.127091	0.241548	0	0		putative cyclin-dependent serine/threonine-protein kinase DDB_G0272797/DDB_G0274007
AARA21_000891	2251.99	-0.669111	0.628894	0.209392	0.00053155	0.00361112	1	0		uncharacterized LOC120903908
AARA21_000892	46798	0.162312	1.11908	0.143172	0.241914	0.384523	0	0		box A-binding factor, transcript variant X27
AARA21_000893	691.303	-0.62324	0.649211	0.274508	0.0110793	0.0393371	0	0		zinc finger protein 62-like
AARA21_000894	3947.74	0.109206	1.07863	0.351345	0.699662	0.806102	0	0		sodium-coupled monocarboxylate transporter 2-like
AARA21_000895	1175.3	-0.141787	0.906396	0.184544	0.389342	0.541234	0	0		cyclin-dependent kinase 6
AARA21_000897	31.1315	-0.00100062	0.999307	0.430048	0.998522	0.999066	0	0		uncharacterized LOC120894815
AARA21_000899	9846.17	0.343582	1.2689	0.28372	0.155151	0.279362	0	0		fatty-acid amide hydrolase 2-B, transcript variant X1
AARA21_000900	2795.2	-0.227559	0.854079	0.299786	0.366266	0.517957	0	0		uncharacterized LOC120902956
AARA21_000901	4968.2	-0.00355497	0.997539	0.152568	0.990493	0.994207	0	0		39S ribosomal protein S30, mitochondrial
AARA21_000903	2849.76	-0.387021	0.764707	0.179282	0.0234011	0.0690354	0	0		erythroid differentiation-related factor 1
AARA21_000904	10840.9	0.164798	1.12101	0.271277	0.491769	0.637349	0	0		zinc finger protein rotund-like, transcript variant X6
AARA21_000906	3.33856	0.856822	1.81104	1.75407	0.0157297	0.0512391	0	0		uncharacterized LOC120897193
AARA21_000909	1310.41	0.140833	1.10254	0.252976	0.535616	0.675085	0	0		uncharacterized LOC120904540
AARA21_000910	6019.34	0.119794	1.08658	0.365125	0.66906	0.782547	0	0		solute carrier organic anion transporter family member 74D-like
AARA21_000911	10765	-0.213276	0.862576	0.159496	0.162175	0.288577	0	0		probable E3 ubiquitin-protein ligase HERC4, transcript variant X5
AARA21_000912	1014.47	-0.0165736	0.988578	0.0959763	0.859535	0.912645	0	0		uncharacterized LOC120895522
AARA21_000914	19946.1	-0.0343875	0.976446	0.248819	0.874335	0.920935	0	0		histone demethylase UTY, transcript variant X1
AARA21_003884	447.404	4.39011	20.9679	0.737034	1.13455e-10	6.75842e-09	1	1	up	regulator of microtubule dynamics protein 1-like
AARA21_000916	2.15979	-0.165341	0.891718	0.579032	0.326104	0.477141	0	0		uncharacterized LOC120906105
AARA21_000917	20981.5	-0.15318	0.899266	0.0928305	0.111116	0.218146	0	0		forkhead box protein K2-like, transcript variant X1
AARA21_000918	18110.3	0.398821	1.31843	0.198609	0.0317402	0.0868568	0	0		protein transport protein SEC31, transcript variant X2
AARA21_002716	3471.04	4.30685	19.7921	0.668688	6.48861e-12	5.49269e-10	1	1	up	polyubiquitin-B
AARA21_002754	18.7625	4.93618	30.6153	2.51206	0.000815788	0.00503924	1	1	up	CLIP domain-containing serine protease 2-like
AARA21_000921	188117	0.239769	1.1808	0.117602	0.0371303	0.0978606	0	0		60S ribosomal protein L26-like, transcript variant X2
AARA21_000922	153.883	0.593797	1.50921	0.409754	0.0583101	0.137321	0	0		uncharacterized LOC120903960, transcript variant X1
AARA21_009205	5.94154	4.24604	18.9752	2.67919	0.00131265	0.00734341	1	1	up	segmentation protein fushi tarazu
AARA21_000926	3077.75	0.00497205	1.00345	0.208527	0.995687	0.99778	0	0		alpha-mannosidase 2, transcript variant X2
AARA21_000927	861.458	0.482795	1.39745	0.453519	0.131126	0.247492	0	0		uncharacterized LOC120896233
AARA21_000928	7.27616	0.312684	1.24202	0.575355	0.248598	0.392276	0	0		uncharacterized LOC120894804
AARA21_000929	4539.76	-0.458841	0.72757	0.20064	0.0143842	0.0478885	0	0		transportin-1
AARA21_000930	2.49216	-0.0720729	0.95127	0.545872	0.642105	0.762174	0	0		uncharacterized LOC120903332, transcript variant X2
AARA21_000931	1489.08	-0.387859	0.764263	0.277921	0.102068	0.205205	0	0		DNA-directed RNA polymerase II subunit RPB7
AARA21_000932	1247.49	-0.09437	0.936681	0.141993	0.439799	0.589161	0	0		post-GPI attachment to proteins factor 3
AARA21_000935	5689.14	0.605526	1.52153	0.149392	2.60189e-05	0.000314647	1	0		integral membrane protein GPR155, transcript variant X1
AARA21_000936	7436.51	-0.642897	0.640426	0.526825	0.0654174	0.149321	0	0		aminopeptidase N-like
AARA21_000937	1230.78	0.493886	1.40823	0.519992	0.135332	0.252548	0	0		ejaculatory bulb-specific protein 3-like, transcript variant X2
AARA21_000938	4940.51	-0.507623	0.70338	0.216984	0.0111246	0.0394435	0	0		zinc finger protein 271-like
AARA21_000939	1008.09	-0.45337	0.730335	0.188968	0.0102117	0.0370543	0	0		integrator complex subunit 8
AARA21_000940	17197	0.0149698	1.01043	0.33894	0.959396	0.975197	0	0		probable serine/threonine-protein kinase MARK-B
AARA21_000941	33.7244	-0.456361	0.728822	0.490678	0.157221	0.282231	0	0		uncharacterized LOC120898226
AARA21_000942	534.093	0.646719	1.5656	0.451173	0.0521835	0.126521	0	0		neuronal acetylcholine receptor subunit alpha-2-like
AARA21_000944	75.7958	-0.216057	0.860915	0.372182	0.446513	0.59569	0	0		uncharacterized LOC120903097
AARA21_000945	10.301	-0.0253888	0.982556	0.521606	0.896902	0.935268	0	0		uncharacterized LOC120901061
AARA21_000947	34.7716	0.0706783	1.05021	0.485024	0.769876	0.855514	0	0		uncharacterized LOC120901405
AARA21_000948	1836.95	-0.386554	0.764955	0.114432	0.000559604	0.00375349	1	0		sin3 histone deacetylase corepressor complex component SDS3
AARA21_000949	494.612	0.0492518	1.03473	0.180919	0.773972	0.858212	0	0		protein regulator of cytokinesis 1-like
AARA21_000950	5.02811	0.12545	1.09085	0.578959	0.281464	0.428036	0	0		uncharacterized LOC120902510
AARA21_000952	4480.34	-0.0107134	0.992602	0.296441	0.964239	0.977997	0	0		uncharacterized LOC120906137, transcript variant X3
AARA21_000953	3.33989	0.122541	1.08865	0.566277	0.401378	0.552533	0	0		large subunit ribosomal RNA
AARA21_000956	182.194	-0.174171	0.886277	0.366142	0.538588	0.677619	0	0		uncharacterized LOC120903755
AARA21_000957	85.8912	0.925464	1.8993	0.526662	0.014844	0.0490619	0	0		uncharacterized LOC120895465
AARA21_000958	2174.09	0.236618	1.17823	0.150714	0.0959093	0.196445	0	0		trafficking protein particle complex subunit 3-like, transcript variant X1
AARA21_000960	98.5243	0.323734	1.25157	0.340908	0.239783	0.382032	0	0		dynein intermediate chain 2, ciliary, transcript variant X2
AARA21_000961	9268.97	0.146069	1.10655	0.238166	0.501147	0.645019	0	0		serine-rich adhesin for platelets
AARA21_005643	1571.19	4.22601	18.7135	0.61651	3.51343e-13	3.70551e-11	1	1	up	maltase 2-like
AARA21_000964	1245.66	-0.163287	0.892988	0.13452	0.210234	0.347563	0	0		transmembrane protein 68-like, transcript variant X1
AARA21_000965	6.7525	0.444494	1.36084	0.668591	0.121278	0.23263	0	0		LOC120907448
AARA21_000967	2817.82	0.12529	1.09073	0.314001	0.651994	0.769962	0	0		serine protease easter-like
AARA21_000968	2860.78	-0.187668	0.878024	0.140148	0.162515	0.288921	0	0		serine/threonine-protein kinase PAK mbt
AARA21_000969	7470.99	0.0675547	1.04794	0.224057	0.74594	0.839384	0	0		uncharacterized LOC120904725, transcript variant X14
AARA21_000970	1813.54	-0.381473	0.767654	0.229549	0.0680693	0.153657	0	0		gamma-tubulin complex component 4 homolog
AARA21_000971	3325.65	0.420291	1.3382	0.170714	0.00968956	0.0356726	0	0		viral IAP-associated factor homolog
AARA21_000973	9.91009	0.515787	1.42977	0.757225	0.0808645	0.173965	0	0		uncharacterized LOC120903242
AARA21_000974	1100.34	-0.396419	0.759742	0.15898	0.00949648	0.0351023	0	0		diphosphomevalonate decarboxylase
AARA21_000975	7.63058	-0.0666832	0.954831	0.505682	0.770432	0.8559	0	0		uncharacterized LOC120895902
AARA21_000976	5724.92	-0.0708464	0.952079	0.1234	0.582034	0.712086	0	0		uncharacterized LOC120905047, transcript variant X1
AARA21_000977	362.347	0.335944	1.2622	0.380058	0.251554	0.395718	0	0		neural cell adhesion molecule 1, transcript variant X5
AARA21_000978	9128.74	-0.113155	0.924564	0.143926	0.428103	0.577521	0	0		E3 ubiquitin-protein transferase MAEA
AARA21_000979	4697.02	0.722176	1.64967	0.25941	0.00192542	0.00994953	1	0		uncharacterized LOC120893487
AARA21_000980	1375.8	-0.408429	0.753443	0.222618	0.0466664	0.1163	0	0		S-phase kinase-associated protein 2
AARA21_000981	2741.85	0.735663	1.66516	0.20734	0.000122807	0.00112547	1	0		probable serine/threonine-protein kinase MARK-A, transcript variant X4
AARA21_000982	11673.2	0.144342	1.10523	0.213119	0.466734	0.614589	0	0		serine-rich adhesin for platelets, transcript variant X1
AARA21_000984	2746.03	0.230978	1.17363	0.19156	0.196141	0.330636	0	0		another transcription unit protein
AARA21_000985	1197.04	-0.413392	0.750856	0.318504	0.119496	0.229915	0	0		elongation of very long chain fatty acids protein 4-like
AARA21_000986	234.189	0.607731	1.52386	0.21198	0.00203098	0.010366	0	0		zinc finger protein 235-like, transcript variant X1
AARA21_000987	821.762	0.421396	1.33922	0.18834	0.017174	0.0547516	0	0		atrial natriuretic peptide receptor 1, transcript variant X2
AARA21_000988	62713.4	0.0450641	1.03173	0.236704	0.773559	0.857828	0	0		glutamine synthetase 1, mitochondrial-like, transcript variant X2
AARA21_000990	2.27893	0.275019	1.21001	0.631134	0.135549	0.252843	0	0		5.8S ribosomal RNA
AARA21_000991	22.9826	1.40055	2.64002	0.950763	0.00858948	0.0323634	0	1		rhodopsin-like
AARA21_000993	4487.08	-0.183277	0.8807	0.169489	0.25558	0.400309	0	0		glyoxylate reductase/hydroxypyruvate reductase, transcript variant X2
AARA21_000994	1383.46	0.0300433	1.02104	0.217106	0.885608	0.928168	0	0		conserved oligomeric Golgi complex subunit 7
AARA21_000996	253.292	-0.225179	0.855489	0.235763	0.295302	0.442971	0	0		zinc finger protein 382-like
AARA21_004169	3.79566	4.82835	28.4105	2.49329	0.000515596	0.00353069	1	1	up	putative nuclease HARBI1
AARA21_000999	22.5467	0.410856	1.32947	0.541413	0.190279	0.323538	0	0		LOC120907526
AARA21_001000	1821.03	0.765096	1.69948	0.406038	0.0171388	0.0547067	0	0		5-hydroxytryptamine receptor-like, transcript variant X1
AARA21_001001	8592.7	0.122448	1.08858	0.217057	0.527812	0.669108	0	0		trithorax group protein osa-like
AARA21_001002	721.155	0.0799597	1.05699	0.264094	0.727028	0.82551	0	0		RYamide receptor, transcript variant X4
AARA21_001003	10.4595	0.36232	1.28549	0.604865	0.197187	0.33192	0	0		uncharacterized LOC120906030
AARA21_001005	3596.21	-0.458018	0.727986	0.364565	0.112808	0.220459	0	0		protein yellow-like
AARA21_001006	1830.33	-0.376391	0.770362	0.314764	0.153228	0.276591	0	0		LOC120901514
AARA21_001007	19.7797	0.0277014	1.01939	0.393141	0.922424	0.950418	0	0		uncharacterized LOC120895291
AARA21_001008	1217.77	-0.73794	0.599595	0.253996	0.00133204	0.00742416	1	0		general transcription factor IIH subunit 2
AARA21_001009	13964.3	-0.00898328	0.993793	0.162092	0.952108	0.969975	0	0		catenin delta-2, transcript variant X1
AARA21_001010	1960.05	0.0262383	1.01835	0.170015	0.873093	0.920778	0	0		frataxin homolog, mitochondrial, transcript variant X1
AARA21_001012	349.272	0.153958	1.11262	0.376218	0.579418	0.709833	0	0		uncharacterized LOC120905018, transcript variant X2
AARA21_001013	5906.32	-0.301238	0.811556	0.332849	0.266935	0.412422	0	0		trichohyalin-like
AARA21_001015	6970.13	-0.77186	0.585662	0.161272	6.22078e-07	1.32521e-05	1	0		nuclear pore complex protein Nup153-like, transcript variant X2
AARA21_001017	14334.2	0.147056	1.10731	0.236306	0.495839	0.640686	0	0		unc-112-related protein-like, transcript variant X3
AARA21_001019	7988.59	-0.121341	0.919333	0.141762	0.409203	0.560123	0	0		uncharacterized LOC120900617
AARA21_001021	6457.29	0.841735	1.7922	0.221199	4.22273e-05	0.0004636	1	0		uncharacterized LOC120895661
AARA21_001383	3722.84	4.16664	17.959	0.607744	3.55162e-13	3.71534e-11	1	1	up	alpha-amylase A-like
AARA21_001023	80169.3	-0.175622	0.885386	0.24549	0.465529	0.613753	0	0		nucleolar GTP-binding protein 1
AARA21_001025	1.74582	-0.0602101	0.959124	0.559232	0.688427	0.797156	0	0		uncharacterized LOC120901672, transcript variant X1
AARA21_001026	8717.22	0.0478786	1.03374	0.171722	0.771786	0.856483	0	0		guanine nucleotide-releasing factor 2, transcript variant X6
AARA21_001028	47311.5	0.0245921	1.01719	0.232561	0.872277	0.920375	0	0		eukaryotic translation initiation factor 3 subunit B
AARA21_001029	81.6604	0.333788	1.26032	0.386174	0.251753	0.395859	0	0		uncharacterized LOC120906694
AARA21_001030	473.453	-0.420381	0.747227	0.181115	0.0135441	0.0457886	0	0		integrator complex subunit 9
AARA21_001031	13851.5	0.432137	1.34923	0.21224	0.0269688	0.0771127	0	0		high affinity cGMP-specific 3',5'-cyclic phosphodiesterase 9A, transcript variant X2
AARA21_001032	90.9491	-0.45745	0.728272	0.467616	0.153028	0.276353	0	0		uncharacterized LOC120906867
AARA21_001033	10965.2	-0.0366801	0.974896	0.281508	0.876679	0.922567	0	0		dipeptidyl peptidase 4, transcript variant X6
AARA21_001034	233.167	0.95628	1.9403	0.489369	0.00948847	0.0350828	0	0		serine protease 53-like, transcript variant X1
AARA21_001037	18704.4	-0.383887	0.76637	0.176057	0.0156646	0.051095	0	0		protein kinase C and casein kinase II substrate protein 3, transcript variant X1
AARA21_001038	1225.66	-0.779333	0.582636	0.424727	0.0178588	0.0564591	0	0		protein arginine N-methyltransferase 5
AARA21_001039	3143.24	1.26721	2.40696	0.659397	0.00575757	0.0236083	0	1		chymotrypsin-2-like, transcript variant X2
AARA21_001040	247.704	0.149253	1.10899	0.28728	0.550526	0.68653	0	0		zwei Ig domain protein zig-8-like, transcript variant X4
AARA21_001041	8219.53	0.0482873	1.03404	0.220839	0.814903	0.883498	0	0		protein unc-119 homolog
AARA21_001042	130.093	0.0664556	1.04714	0.34021	0.807376	0.879413	0	0		uncharacterized LOC120901531, transcript variant X2
AARA21_001043	2.3158	0.318752	1.24725	0.649536	0.125957	0.239818	0	0		LOC120907406
AARA21_001045	799.21	0.832793	1.78113	0.355744	0.00520715	0.0217888	0	0		uncharacterized LOC120899445
AARA21_001046	3885.77	0.391324	1.3116	0.152225	0.00691099	0.0273141	0	0		uncharacterized LOC120894485
AARA21_001047	25.537	0.153494	1.11226	0.39278	0.592872	0.721234	0	0		ADP-ribosylation factor-like protein 16
AARA21_001048	3375.11	-0.569995	0.673619	0.301718	0.0277319	0.0785442	0	0		facilitated trehalose transporter Tret1-like, transcript variant X2
AARA21_001050	15.2678	0.386209	1.30695	0.616263	0.172377	0.30111	0	0		uncharacterized LOC120894310
AARA21_001051	19107.9	0.118895	1.0859	0.175202	0.48116	0.628154	0	0		uncharacterized LOC120903633, transcript variant X10
AARA21_001052	13.8478	-1.87847	0.271972	1.00519	0.00358259	0.0161972	0	1		uncharacterized LOC120906071
AARA21_001053	114.993	-0.225932	0.855042	0.391384	0.428211	0.577606	0	0		peroxisomal (S)-2-hydroxy-acid oxidase GLO3-like, transcript variant X2
AARA21_001055	1177.01	-0.739143	0.599095	0.608747	0.0475802	0.117883	0	0		aquaporin AQPAn.G-like, transcript variant X2
AARA21_001056	1828.13	-0.0225999	0.984457	0.269378	0.92058	0.949325	0	0		ribosomal RNA small subunit methyltransferase NEP1
AARA21_001057	9662.53	0.418561	1.33659	0.226792	0.0439004	0.111238	0	0		calpain-A-like, transcript variant X1
AARA21_006847	1813.27	4.80242	27.9044	0.579043	5.69541e-18	1.66552e-15	1	1	up	maltase 2-like
AARA21_001059	1362.79	0.838788	1.78855	0.355843	0.00486597	0.0206023	0	0		cystinosin homolog
AARA21_001060	2.97921	-0.0688459	0.9534	0.534231	0.723523	0.823492	0	0		AH receptor-interacting protein-like
AARA21_001061	5126.82	0.344003	1.26927	0.154112	0.0198555	0.0612222	0	0		glucose-induced degradation protein 8 homolog, transcript variant X1
AARA21_005830	375.552	4.79987	27.8551	0.851016	7.71578e-10	3.69067e-08	1	1	up	multiple epidermal growth factor-like domains protein 6
AARA21_001064	15183.8	0.0470515	1.03315	0.148335	0.743958	0.838003	0	0		verprolin-like, transcript variant X8
AARA21_001065	2.80892	-0.137523	0.909078	0.572809	0.257969	0.402697	0	0		uncharacterized LOC120904432
AARA21_001066	1896.9	0.0492709	1.03474	0.164177	0.795693	0.872449	0	0		anoctamin-10, transcript variant X7
AARA21_001068	216168	0.306215	1.23646	0.243258	0.1643	0.291299	0	0		60S ribosomal protein L13a
AARA21_013319	632.173	4.16101	17.8891	1.69849	0.000408334	0.00294674	1	1	up	adult cuticle protein 1-like
AARA21_006716	1056.57	4.1562	17.8296	0.498364	3.87827e-18	1.18814e-15	1	1	up	glutathione peroxidase-like
AARA21_001073	2649.11	0.150822	1.1102	0.176257	0.361571	0.51373	0	0		glycerophosphodiester phosphodiesterase 1
AARA21_001074	1580.87	-0.238124	0.847847	0.223636	0.259038	0.403809	0	0		alpha-1,3-mannosyl-glycoprotein 4-beta-N-acetylglucosaminyltransferase A, transcript variant X1
AARA21_001075	37.5935	0.206	1.15349	0.382987	0.475782	0.622717	0	0		uncharacterized LOC120900053
AARA21_001076	13.3303	-1.12859	0.457364	0.716779	0.0136105	0.0459768	0	1		uncharacterized LOC120902871
AARA21_001077	1146.16	1.02523	2.03529	0.573369	0.0110069	0.0391554	0	1		solute carrier family 25 member 35-like
AARA21_001078	8.89703	-0.0195184	0.986562	0.476663	0.942508	0.963627	0	0		myosin-G heavy chain-like, transcript variant X2
AARA21_001079	11079.3	-0.558815	0.67886	0.398106	0.0681599	0.153727	0	0		probable aminopeptidase NPEPL1
AARA21_001080	6.3643	0.627863	1.54527	1.17134	0.0117732	0.0412544	0	0		LOC120901054
AARA21_001081	6031.96	0.159442	1.11685	0.151667	0.275502	0.421474	0	0		GATOR complex protein Iml1, transcript variant X2
AARA21_001082	6235.82	0.298832	1.23015	0.268833	0.208223	0.345081	0	0		alpha-(1,3)-fucosyltransferase C
AARA21_001083	2230.74	-0.107513	0.928187	0.164192	0.479952	0.626767	0	0		uncharacterized LOC120896578, transcript variant X8
AARA21_001084	9245.54	-0.0627978	0.957406	0.235748	0.72493	0.82397	0	0		adapter molecule Crk, transcript variant X2
AARA21_014776	68.3622	4.75959	27.0881	0.976705	4.26223e-08	1.33436e-06	1	1	up	mucin-5AC-like
AARA21_001087	979.452	-0.174583	0.886023	0.301067	0.495201	0.640377	0	0		U6 snRNA-associated Sm-like protein LSm2
AARA21_001088	119943	0.268455	1.20452	0.16821	0.09455	0.19467	0	0		60S ribosomal protein L34-like
AARA21_001089	128381	0.215998	1.16151	0.145052	0.131719	0.248238	0	0		60S ribosomal protein L32
AARA21_001090	401.015	-0.268624	0.830111	0.180474	0.11496	0.223707	0	0		serendipity locus protein beta-like
AARA21_001091	30.5917	0.174039	1.12821	0.435619	0.555811	0.690644	0	0		uncharacterized LOC120896442
AARA21_001095	7518.4	0.0355512	1.02495	0.229428	0.86854	0.917981	0	0		zinc transporter foi, transcript variant X1
AARA21_001096	265.783	0.112821	1.08134	0.540776	0.573848	0.705562	0	0		SET and MYND domain-containing protein 4-like
AARA21_001097	2657.57	-0.582209	0.66794	0.317851	0.0305366	0.0843707	0	0		nucleolysin TIAR, transcript variant X5
AARA21_001098	694.516	-0.660908	0.63248	0.249569	0.00318729	0.0148054	0	0		double-strand break repair protein MRE11
AARA21_001099	3234.48	0.674147	1.59565	0.519375	0.0570676	0.135129	0	0		serine protease 7-like, transcript variant X1
AARA21_013803	38.1769	4.14945	17.7464	0.853789	4.87829e-08	1.4839e-06	1	1	up	general odorant-binding protein 68
AARA21_001101	3.66521	-0.21543	0.861289	0.618723	0.101054	0.203915	0	0		anaphase spindle elongation protein 1-like
AARA21_001105	8107.24	-0.232218	0.851325	0.139932	0.0766826	0.167176	0	0		sorting nexin-2, transcript variant X1
AARA21_001106	3359.04	0.0419708	1.02952	0.215579	0.858474	0.911987	0	0		protein suppressor 2 of zeste, transcript variant X2
AARA21_001107	573.375	-0.204985	0.867548	0.289695	0.399663	0.550998	0	0		hornerin, transcript variant X3
AARA21_011280	10388.9	4.02558	16.2862	0.542167	5.61365e-15	8.5989e-13	1	1	up	farnesol dehydrogenase-like
AARA21_001109	1379.46	-0.170764	0.888372	0.213957	0.393397	0.544987	0	0		uncharacterized LOC120893984
AARA21_001111	3377.51	0.00439667	1.00305	0.169962	0.980159	0.988146	0	0		non-lysosomal glucosylceramidase, transcript variant X1
AARA21_001112	1.4534	-0.0104097	0.992811	0.566785	0.659374	0.775518	0	0		tRNA-His
AARA21_001113	174263	0.618688	1.53548	0.218301	0.00218434	0.0109746	0	0		soma ferritin
AARA21_001115	4345.7	0.0523685	1.03697	0.131922	0.684216	0.794249	0	0		phosphatidylglycerophosphatase and protein-tyrosine phosphatase 1, transcript variant X1
AARA21_000590	13.0918	4.73981	26.7193	1.6049	9.34513e-05	0.000900028	1	1	up	uncharacterized LOC120904892
AARA21_001117	8274.77	-0.288451	0.818781	0.156364	0.0541629	0.130027	0	0		MAP kinase-activating death domain protein, transcript variant X1
AARA21_013912	386.137	4.72121	26.377	1.34741	1.76486e-05	0.000229843	1	1	up	hexamerin-1.1-like
AARA21_001119	38071.7	0.561077	1.47537	0.170087	0.000535101	0.0036314	1	0		peroxiredoxin-5, mitochondrial
AARA21_001120	240391	-0.927418	0.525799	0.722447	0.0258682	0.0745289	0	0		flocculation protein FLO11-like
AARA21_001121	1280.77	0.103639	1.07448	0.18119	0.548446	0.684666	0	0		probable dimethyladenosine transferase
AARA21_001122	5463.59	-0.221105	0.857908	0.125908	0.0712183	0.158267	0	0		alpha-(1,6)-fucosyltransferase
AARA21_001123	55.9744	-0.0393391	0.973101	0.318476	0.879146	0.923879	0	0		uncharacterized LOC120906491, transcript variant X5
AARA21_001124	5367.14	-0.305169	0.809347	0.212642	0.119931	0.230606	0	0		UPF0430 protein CG31712
AARA21_001125	15.6379	-0.35812	0.780181	0.559737	0.234746	0.37664	0	0		uncharacterized LOC120904564
AARA21_001126	15392	-0.110168	0.92648	0.243806	0.614227	0.738622	0	0		mediator of RNA polymerase II transcription subunit 13, transcript variant X3
AARA21_001127	165927	-0.286083	0.820126	0.310107	0.269892	0.415694	0	0		ATP-dependent RNA helicase DBP2-A-like, transcript variant X2
AARA21_001128	698.938	0.194696	1.14448	0.252083	0.38724	0.53942	0	0		irregular chiasm C-roughest protein-like, transcript variant X2
AARA21_001130	1569.38	-0.703653	0.614016	0.200137	0.000164017	0.00141417	1	0		condensin complex subunit 3
AARA21_001131	3425.2	-0.280675	0.823206	0.180503	0.0963332	0.196937	0	0		carnitine O-palmitoyltransferase 2, mitochondrial
AARA21_001132	23399.8	-0.216344	0.860744	0.179416	0.201954	0.337019	0	0		serine/threonine-protein kinase Tao, transcript variant X4
AARA21_001134	66594.9	0.118987	1.08597	0.142264	0.389	0.54098	0	0		calmodulin
AARA21_001135	4672.38	0.0986877	1.0708	0.155696	0.511205	0.654748	0	0		uncharacterized LOC120900311, transcript variant X1
AARA21_001137	376.936	0.246656	1.18645	0.434081	0.407566	0.55884	0	0		uncharacterized LOC120896995
AARA21_001138	5031.54	0.0863818	1.0617	0.194352	0.63786	0.758955	0	0		E3 ubiquitin-protein ligase MIB2
AARA21_001139	4432.54	0.308005	1.23799	0.161023	0.0509782	0.124231	0	0		charged multivesicular body protein 5
AARA21_001140	37990.7	0.333946	1.26046	0.15789	0.0274448	0.0780049	0	0		serine/threonine-protein phosphatase alpha-2 isoform, transcript variant X2
AARA21_001142	5201.33	0.192663	1.14287	0.27922	0.430189	0.579222	0	0		ATP-binding cassette sub-family G member 1-like, transcript variant X4
AARA21_001143	487.51	-0.258922	0.835712	0.187677	0.143375	0.263355	0	0		zinc finger protein 14-like
AARA21_001145	9.28012	-0.296766	0.814075	0.599044	0.229421	0.37057	0	0		uncharacterized LOC120903883
AARA21_001146	2.41526	-0.145135	0.904295	0.552417	0.442549	0.591613	0	0		uncharacterized LOC120906006
AARA21_001147	4436.97	-0.323097	0.799352	0.176392	0.0499738	0.122513	0	0		rap guanine nucleotide exchange factor 2, transcript variant X1
AARA21_001150	55.6092	0.0477801	1.03367	0.338383	0.864661	0.915686	0	0		tetratricopeptide repeat protein 8
AARA21_001151	12923	0.961792	1.94773	0.305884	0.000392734	0.00286468	1	0		glutamine synthetase 2 cytoplasmic, transcript variant X2
AARA21_004362	24.76	4.00313	16.0347	0.889207	3.08192e-07	7.30297e-06	1	1	up	protein obstructor-E
AARA21_001154	5746.33	0.517952	1.43192	0.195939	0.00478589	0.0203436	0	0		ras-like GTP-binding protein RhoL
AARA21_001156	2328.78	0.260566	1.19795	0.282799	0.284274	0.431413	0	0		apyrase-like
AARA21_001159	3087.59	0.390613	1.31095	0.279039	0.100102	0.202581	0	0		mitochondrial ornithine transporter 1
AARA21_001160	2924.69	-0.551201	0.682452	0.244168	0.0124483	0.0430109	0	0		uncharacterized LOC120901201
AARA21_001161	1191.91	-0.633467	0.644625	0.342468	0.0255537	0.0737881	0	0		DNA replication licensing factor Mcm6
AARA21_001163	27566.5	0.486177	1.40073	0.15865	0.00138097	0.00764182	1	0		AN1-type zinc finger protein 6, transcript variant X3
AARA21_001164	16.3911	-0.286379	0.819957	0.443881	0.344097	0.49619	0	0		zinc finger protein 845-like
AARA21_011325	41.6334	4.71683	26.2971	0.996373	1.57584e-07	4.16351e-06	1	1	up	uncharacterized LOC120903932
AARA21_001166	14346.1	0.938713	1.91682	0.309727	0.000585478	0.0038696	1	0		phosphoglucomutase
AARA21_001167	30305.6	-0.356176	0.781233	0.376122	0.217434	0.355492	0	0		uncharacterized LOC120901912
AARA21_001168	232.223	-0.252568	0.839401	0.334397	0.347326	0.499669	0	0		uncharacterized LOC120893561
AARA21_001170	6128.36	-0.0856673	0.942349	0.1029	0.414362	0.564131	0	0		thioredoxin, mitochondrial
AARA21_001171	146.825	1.2185	2.32705	0.752551	0.00957516	0.0353323	0	1		uncharacterized LOC120902624
AARA21_001172	692.943	0.53569	1.44964	0.296512	0.0362157	0.0958626	0	0		transient receptor potential channel pyrexia-like
AARA21_001173	1179.09	-0.250713	0.840481	0.143421	0.0639337	0.146559	0	0		telomere zinc finger-associated protein
AARA21_001176	24073	0.433928	1.35091	0.127062	0.000447953	0.00315653	1	0		protein zer-1 homolog
AARA21_001177	2.09506	-0.137107	0.909341	0.587544	0.200321	0.335464	0	0		uncharacterized LOC120906184
AARA21_001178	11.3733	-0.288713	0.818632	0.62273	0.163996	0.291014	0	0		perlucin-like
AARA21_001179	47.3613	-0.158587	0.895902	0.443326	0.582034	0.712086	0	0		golgin subfamily A member 4
AARA21_001181	24868.2	0.249928	1.18915	0.161944	0.107135	0.212798	0	0		cdc42 homolog, transcript variant X2
AARA21_001182	15.5868	-0.140163	0.907417	0.477574	0.604084	0.731103	0	0		doublesex- and mab-3-related transcription factor A2, transcript variant X1
AARA21_001183	623.381	0.410594	1.32923	0.300639	0.106406	0.211676	0	0		ankyrin repeat and BTB/POZ domain-containing protein 2, transcript variant X5
AARA21_001184	1502.53	-0.440868	0.736691	0.134602	0.000634778	0.00413119	1	0		uncharacterized LOC120899671
AARA21_001186	5013.61	-0.561589	0.677556	0.163132	0.000313928	0.00239296	1	0		uncharacterized LOC120893488
AARA21_001187	25332.2	0.339692	1.26549	0.230562	0.106705	0.212043	0	0		MOB kinase activator-like 2, transcript variant X7
AARA21_008224	9316.85	4.70791	26.1349	0.707797	1.42475e-12	1.33812e-10	1	1	up	alpha-amylase 2-like
AARA21_008672	178.836	4.69989	25.9901	0.965878	4.70239e-08	1.4475e-06	1	1	up	protein croquemort-like
AARA21_001190	98.365	-1.04162	0.48578	0.500786	0.00617788	0.02495	0	1		uncharacterized LOC120900994
AARA21_001191	2.03442	0.0775054	1.05519	0.560013	0.552498	0.687873	0	0		uncharacterized LOC120895695
AARA21_001194	2038.79	0.0522688	1.03689	0.118644	0.65342	0.770982	0	0		ATP-binding cassette sub-family B member 10, mitochondrial
AARA21_001195	2815.15	0.402806	1.32208	0.346299	0.151183	0.273713	0	0		uncharacterized LOC120908425
AARA21_001196	1039.15	-0.138981	0.90816	0.313097	0.616383	0.740661	0	0		chondroitin sulfate glucuronyltransferase
AARA21_001197	3611.06	-0.356091	0.781278	0.256609	0.118629	0.228845	0	0		potassium voltage-gated channel protein eag, transcript variant X3
AARA21_001198	9253.92	0.0713537	1.0507	0.213931	0.72112	0.821897	0	0		DDB1- and CUL4-associated factor 11
AARA21_001218	251.362	3.91101	15.0429	0.615468	1.08761e-11	8.32989e-10	1	1	up	protein obstructor-E-like
AARA21_001201	2294.6	-0.575747	0.670939	0.256895	0.0118224	0.0413745	0	0		dolichyldiphosphatase 1-like
AARA21_001202	3868.79	0.330482	1.25743	0.158735	0.0296702	0.0824931	0	0		ras suppressor protein 1
AARA21_001203	4257.29	-0.11013	0.926505	0.171882	0.50386	0.647657	0	0		ubiquitin-like protein 5, transcript variant X2
AARA21_001204	9133.43	-0.234301	0.850097	0.104259	0.022061	0.0659831	0	0		dynamin-1-like protein, transcript variant X1
AARA21_001205	10504.8	-0.419816	0.74752	0.253469	0.0634355	0.145761	0	0		cold shock domain-containing protein CG9705
AARA21_001206	1077.62	-0.435274	0.739553	0.307448	0.0937688	0.193632	0	0		transcription elongation factor 1 homolog
AARA21_001207	3469.65	0.20297	1.15107	0.122712	0.0922874	0.191125	0	0		endoplasmic reticulum lectin 1, transcript variant X2
AARA21_012818	11.7787	4.68609	25.7428	1.69389	0.000247405	0.00196868	1	1	up	lopap-like
AARA21_005988	250.749	3.87048	14.6261	1.1941	3.874e-05	0.000432323	1	1	up	pyrimidine-specific ribonucleoside hydrolase RihA-like, transcript variant X1
AARA21_001213	25.6954	0.733567	1.66275	0.810262	0.0532633	0.128485	0	0		uncharacterized LOC120896257
AARA21_001214	7925.28	-0.482108	0.715931	0.414897	0.117688	0.227474	0	0		uncharacterized LOC120906168
AARA21_001215	49595.8	0.308117	1.23809	0.159228	0.0435789	0.110707	0	0		probable elongation factor 1-delta, transcript variant X1
AARA21_001216	15.7254	0.179312	1.13234	0.43258	0.540818	0.679119	0	0		uncharacterized LOC120897337
AARA21_001217	13.3635	-0.224684	0.855782	0.414228	0.444412	0.593578	0	0		uncharacterized LOC120904590, transcript variant X2
AARA21_007333	722.163	3.85649	14.485	0.795206	5.40192e-08	1.63046e-06	1	1	up	volume-regulated anion channel subunit LRRC8A-like
AARA21_001219	1397.17	-0.292912	0.816253	0.308856	0.246214	0.389565	0	0		phosphopantothenate--cysteine ligase
AARA21_001220	1872.18	0.133061	1.09662	0.128926	0.290316	0.438181	0	0		chitobiosyldiphosphodolichol beta-mannosyltransferase
AARA21_001222	18.4728	0.12862	1.09325	0.509964	0.597152	0.725138	0	0		odorant receptor 49b-like
AARA21_010652	34.1152	4.6381	24.9004	1.42243	3.55957e-05	0.000406038	1	1	up	fibrinogen-like protein A
AARA21_001224	10263.8	-0.474755	0.719589	0.168206	0.00377913	0.0168782	0	0		CD2-associated protein-like, transcript variant X3
AARA21_001225	3043.76	-0.294957	0.815097	0.170544	0.06873	0.154701	0	0		peroxiredoxin-6
AARA21_001227	2949.47	0.00978688	1.00681	0.19117	0.955393	0.9724	0	0		solute carrier family 25 member 40-like, transcript variant X1
AARA21_001228	1182.63	-0.0562377	0.961769	0.148494	0.650591	0.769266	0	0		mitochondrial 2-oxodicarboxylate carrier
AARA21_001229	3511.53	0.0438838	1.03089	0.243106	0.844943	0.902456	0	0		uncharacterized LOC120893571
AARA21_001230	4534.1	0.193047	1.14318	0.148822	0.173105	0.302218	0	0		derlin-1
AARA21_001231	3340.05	-0.107868	0.927959	0.262514	0.639807	0.760498	0	0		DNA polymerase zeta catalytic subunit, transcript variant X3
AARA21_001232	23.8469	0.353926	1.27803	0.525078	0.250891	0.395033	0	0		uncharacterized LOC120901664
AARA21_001233	3611.22	0.216836	1.16218	0.0997115	0.0262336	0.0754803	0	0		ribosome maturation protein SBDS
AARA21_001234	153933	0.048643	1.03429	0.151423	0.741286	0.836685	0	0		60S ribosomal protein L14
AARA21_001236	3206.98	0.445554	1.36184	0.153784	0.0025686	0.0124859	0	0		SLIT and NTRK-like protein 4
AARA21_002012	1175.49	3.81747	14.0985	0.704035	2.56454e-09	1.11104e-07	1	1	up	xanthine dehydrogenase-like
AARA21_001238	2541.93	-0.22066	0.858173	0.219221	0.273087	0.419009	0	0		PP2C-like domain-containing protein CG9801
AARA21_001240	1591.63	-0.294403	0.81541	0.244334	0.182846	0.314109	0	0		E3 ubiquitin-protein ligase HECW2
AARA21_001241	606.356	-0.635815	0.643577	0.359123	0.0285186	0.0800285	0	0		origin recognition complex subunit 3
AARA21_001244	16.1215	0.460977	1.37647	0.547181	0.1464	0.267368	0	0		LOC120907316
AARA21_001245	157.911	0.116732	1.08428	0.219435	0.569141	0.701921	0	0		zinc finger SWIM domain-containing protein 7-like
AARA21_001246	327.959	-0.0519067	0.964661	0.269831	0.823032	0.889239	0	0		uncharacterized LOC120903858
AARA21_001247	1657.41	0.0905022	1.06474	0.24278	0.676459	0.789049	0	0		distal membrane-arm assembly complex protein 2
AARA21_001248	13588.5	0.270864	1.20653	0.171965	0.0980639	0.199524	0	0		uncharacterized LOC120906356, transcript variant X1
AARA21_001250	4436.17	0.0251916	1.01761	0.151224	0.861905	0.913971	0	0		aminoacyl tRNA synthase complex-interacting multifunctional protein 1, transcript variant X2
AARA21_001251	365.801	0.388031	1.30861	0.367665	0.173192	0.302328	0	0		RING finger protein nhl-1-like
AARA21_001252	3.01552	-0.194232	0.874038	0.560936	0.37118	0.522936	0	0		uncharacterized LOC120896950
AARA21_001253	2508.54	-0.169316	0.889264	0.158172	0.261933	0.40683	0	0		peroxisomal membrane protein PEX16
AARA21_001254	97.5061	0.153265	1.11208	0.407873	0.604179	0.731117	0	0		serine/threonine-protein kinase Nek5-like
AARA21_001255	2176.2	-0.00586519	0.995943	0.252948	0.976982	0.986165	0	0		p21-activated protein kinase-interacting protein 1-like
AARA21_001257	1144.56	-0.34195	0.788974	0.171484	0.0355146	0.0943755	0	0		uncharacterized protein DDB_G0284459
AARA21_001258	2366.41	0.207737	1.15488	0.0932923	0.0242046	0.0708303	0	0		protein lin-7 homolog C
AARA21_001259	20.6958	0.105843	1.07612	0.43026	0.711596	0.814962	0	0		uncharacterized LOC120903735
AARA21_001260	3459.98	0.969752	1.9585	0.28639	0.000165849	0.00142646	1	0		zinc transporter ZIP10
AARA21_014096	8065.2	3.7953	13.8835	0.499614	1.77853e-15	3.13484e-13	1	1	up	sphingomyelin phosphodiesterase-like
AARA21_001262	2883.33	0.932717	1.90887	0.329764	0.00110291	0.00637806	1	0		sodium-coupled monocarboxylate transporter 1
AARA21_001264	1302.49	-0.515219	0.699687	0.251857	0.022586	0.0671387	0	0		probable tyrosyl-DNA phosphodiesterase
AARA21_001265	74.0303	-0.529647	0.692724	0.362901	0.0712484	0.158279	0	0		uncharacterized LOC120902969
AARA21_001267	1242.64	-0.164203	0.892421	0.262135	0.489674	0.635465	0	0		lysosomal acid glucosylceramidase
AARA21_010485	67.9913	4.59944	24.2421	1.02078	2.74374e-07	6.63603e-06	1	1	up	scoloptoxin SSD14-like, transcript variant X1
AARA21_001269	6.94025	0.697194	1.62135	1.38675	0.0093134	0.0345746	0	0		uncharacterized LOC120905128
AARA21_001271	677.3	-1.02666	0.490845	0.484459	0.00571458	0.0234843	0	1		putative tripartite motif-containing protein 75
AARA21_001272	2654.42	-0.365376	0.776267	0.203204	0.0530747	0.128126	0	0		general transcription factor IIE subunit 1
AARA21_001273	260.782	0.441678	1.35818	0.246709	0.0466636	0.1163	0	0		probable tubulin polyglutamylase ttll-15
AARA21_001274	41131.9	-0.0330314	0.977364	0.151766	0.819263	0.886209	0	0		E3 ubiquitin-protein ligase Ufd4, transcript variant X3
AARA21_001276	34.5089	0.132781	1.09641	0.334193	0.622565	0.745513	0	0		LIM/homeobox protein Awh-like
AARA21_001277	15912.1	0.353058	1.27727	0.149661	0.0130031	0.0443561	0	0		elongation factor Tu, mitochondrial
AARA21_001279	3700.24	0.299365	1.2306	0.112074	0.00600722	0.0244064	0	0		dnaJ homolog subfamily B member 14-like, transcript variant X1
AARA21_001281	8862.57	-0.196941	0.872399	0.44741	0.494499	0.639791	0	0		uncharacterized LOC120900816
AARA21_001283	3732.52	0.466074	1.38135	0.141575	0.000656145	0.00423401	1	0		proteasome subunit beta type-1
AARA21_001284	574.141	0.811213	1.75469	0.338364	0.00477874	0.0203266	0	0		uncharacterized LOC120905659
AARA21_001285	16.0604	-0.66913	0.628886	0.594417	0.0709745	0.158025	0	0		uncharacterized protein K02A2.6-like
AARA21_009136	5.93444	4.58498	24.0003	1.80248	0.000409388	0.00295104	1	1	up	general odorant-binding protein 67
AARA21_001288	248.861	-0.471489	0.72122	0.357418	0.0972209	0.198342	0	0		DNA repair protein RAD51 homolog 4
AARA21_001289	5452.03	0.179913	1.13282	0.123678	0.147039	0.268057	0	0		protein transport protein Sec61 subunit beta-like
AARA21_001290	16387	-0.247902	0.84212	0.198724	0.191111	0.324281	0	0		uncharacterized LOC120906416, transcript variant X1
AARA21_001291	44.7494	1.27563	2.42104	1.00186	0.0127327	0.0436651	0	1		uncharacterized LOC120894834
AARA21_001292	2578.1	-0.0212609	0.985371	0.178425	0.850162	0.906057	0	0		tubulin--tyrosine ligase-like protein 12
AARA21_001293	14555.2	-0.712262	0.610363	0.174826	2.07874e-05	0.000260611	1	0		E3 ubiquitin-protein ligase Su(dx), transcript variant X3
AARA21_001294	12856.2	0.353096	1.2773	0.112898	0.00139421	0.00769929	1	0		protein lifeguard 1-like
AARA21_001295	542.145	-0.982422	0.506129	0.416842	0.00334706	0.0153974	0	0		uncharacterized LOC120903795
AARA21_001296	11000.7	-0.328108	0.79658	0.171492	0.0438878	0.111228	0	0		acidic leucine-rich nuclear phosphoprotein 32 family member A, transcript variant X1
AARA21_001297	8319.42	-0.465742	0.724099	0.27743	0.0548077	0.131056	0	0		RNA polymerase II elongation factor Ell, transcript variant X5
AARA21_001298	8871.46	0.0964315	1.06913	0.0911462	0.284289	0.431413	0	0		E3 ubiquitin-protein ligase RNF185-like, transcript variant X2
AARA21_001299	3030.8	-0.120571	0.919824	0.163444	0.432049	0.581321	0	0		28S ribosomal protein S35, mitochondrial
AARA21_001300	39.5841	-0.0055992	0.996126	0.479196	0.984851	0.990702	0	0		odorant receptor 43a-like
AARA21_001301	65799.1	0.406584	1.32554	0.370278	0.163629	0.290523	0	0		metallo-beta-lactamase domain-containing protein 1
AARA21_001302	71.0179	0.365413	1.28825	0.502835	0.241709	0.384243	0	0		uncharacterized LOC120901185
AARA21_001303	854.304	-0.0720482	0.951287	0.267158	0.750544	0.842766	0	0		folylpolyglutamate synthase, mitochondrial, transcript variant X2
AARA21_001304	18.0577	0.165845	1.12182	0.553663	0.421708	0.57129	0	0		uncharacterized LOC120897983
AARA21_001305	6812.23	-0.170982	0.888238	0.169732	0.304644	0.453215	0	0		ubiquitin-conjugating enzyme E2-24 kDa, transcript variant X1
AARA21_001306	3.1294	0.178973	1.13208	0.571272	0.34766	0.499926	0	0		LIM domain-containing protein A-like
AARA21_001307	13.9289	0.180057	1.13293	0.445175	0.536398	0.675787	0	0		uncharacterized LOC120903034
AARA21_001308	1261.46	0.0492263	1.03471	0.222841	0.812166	0.882539	0	0		uncharacterized LOC120906171
AARA21_001310	5808.27	0.26861	1.20465	0.273738	0.248705	0.392276	0	0		collagen alpha-1(XVIII) chain, transcript variant X2
AARA21_001311	4008.04	-1.16251	0.446735	0.70108	0.0106438	0.03817	0	1		membrane-bound alkaline phosphatase-like
AARA21_015761	5.39026	4.55057	23.4346	1.86639	0.000542244	0.00366442	1	1	up	uncharacterized LOC120894440
AARA21_001313	2005.19	-1.29601	0.407251	0.696134	0.00551045	0.022788	0	1		uncharacterized LOC120901852, transcript variant X2
AARA21_008233	41.5081	4.52321	22.9944	0.925479	4.16992e-08	1.31711e-06	1	1	up	zinc metalloproteinase nas-4, transcript variant X1
AARA21_001316	4046.03	0.478287	1.39309	0.336788	0.0861511	0.181786	0	0		serine protease snake-like, transcript variant X1
AARA21_001317	11067.5	-0.536071	0.689646	0.219773	0.00810303	0.0308558	0	0		ubiquitin-conjugating enzyme E2 Q2, transcript variant X5
AARA21_001318	15560	0.721719	1.64915	0.405082	0.0231349	0.0683843	0	0		glutamate-gated chloride channel, transcript variant X5
AARA21_001322	7119.8	-0.125211	0.91687	0.208594	0.542038	0.679895	0	0		coatomer subunit beta
AARA21_001323	307.908	0.467101	1.38233	0.161198	0.00221262	0.0110812	0	0		uncharacterized LOC120904633
AARA21_001324	2.31897	0.413614	1.33202	0.797814	0.0148848	0.0491587	0	0		general odorant-binding protein 56d-like
AARA21_001691	72.4822	4.52243	22.9819	1.13411	2.75209e-06	4.74044e-05	1	1	up	hexamerin-1.1-like
AARA21_001327	3820.14	-0.239401	0.847097	0.166676	0.134086	0.251047	0	0		uncharacterized LOC120897113
AARA21_001328	2489.66	0.163911	1.12032	0.318738	0.538243	0.677384	0	0		uncharacterized LOC120898371
AARA21_001329	4.15824	-0.0646884	0.956152	0.552614	0.62742	0.750141	0	0		uncharacterized LOC120908540
AARA21_001330	27.1673	0.351383	1.27578	0.422598	0.251065	0.395211	0	0		uncharacterized LOC120901964, transcript variant X1
AARA21_001331	5992.92	0.197776	1.14693	0.224088	0.330901	0.482387	0	0		ras-associated and pleckstrin homology domains-containing protein 1, transcript variant X1
AARA21_001332	5.53928	-0.11619	0.922621	0.520151	0.606808	0.733196	0	0		small nucleolar RNA U18
AARA21_001333	412	0.0540596	1.03818	0.368564	0.839895	0.899527	0	0		cardioactive peptide, transcript variant X2
AARA21_001334	15135.3	0.299448	1.23067	0.335718	0.273888	0.419888	0	0		uncharacterized LOC120907058
AARA21_001335	117.402	1.65756	3.15483	0.800012	0.00250462	0.0122858	0	1		LOC120902898
AARA21_001336	973.937	0.552676	1.4668	0.195107	0.00251494	0.0123096	0	0		hexosaminidase D, transcript variant X3
AARA21_001337	33.6424	0.917062	1.88827	1.14091	0.0285252	0.0800285	0	0		uncharacterized LOC120904165
AARA21_001338	10931	-0.0167351	0.988467	0.140225	0.900553	0.937038	0	0		general transcription factor IIH subunit 1, transcript variant X1
AARA21_001339	5757.48	0.991748	1.98859	0.390312	0.00223594	0.0111641	0	0		glycerol kinase
AARA21_001340	116.609	-0.125682	0.916571	0.38585	0.652445	0.770326	0	0		facilitated trehalose transporter Tret1-like
AARA21_001341	29.5661	1.30178	2.46533	0.592612	0.00263546	0.0127387	0	1		uncharacterized LOC120899519
AARA21_001342	14453.4	0.0938999	1.06725	0.235757	0.663771	0.778413	0	0		CUGBP Elav-like family member 4, transcript variant X9
AARA21_001343	13670.6	-0.204987	0.867546	0.106959	0.0567253	0.134575	0	0		heterogeneous nuclear ribonucleoprotein K homolog, transcript variant X3
AARA21_001344	8.35451	0.957093	1.94139	1.10685	0.0281115	0.0793399	0	0		uncharacterized LOC120896858
AARA21_001345	43049.1	0.366293	1.28904	0.383373	0.215658	0.353487	0	0		maltase A3-like
AARA21_001347	6824.14	-0.46415	0.724898	0.144706	0.000703749	0.00447388	1	0		tRNA pseudouridine synthase A
AARA21_001348	3255.33	0.176027	1.12977	0.189723	0.313326	0.463079	0	0		uncharacterized LOC120893898, transcript variant X1
AARA21_001350	176.278	-0.283922	0.821355	0.289505	0.247877	0.391389	0	0		trypsin-1
AARA21_001351	2155.09	-0.154535	0.898422	0.204549	0.416409	0.56615	0	0		cerebral peptide 1
AARA21_001352	2737.43	-0.690296	0.619727	0.337826	0.0153908	0.050484	0	0		uncharacterized LOC120904617
AARA21_001353	4333.84	-0.240474	0.846467	0.149426	0.0946298	0.194754	0	0		zinc finger-containing ubiquitin peptidase 1-like, transcript variant X1
AARA21_001354	8.06248	-0.113389	0.924414	0.513185	0.628901	0.751283	0	0		carboxypeptidase N subunit 2-like
AARA21_001355	5624.36	-0.316705	0.802901	0.18624	0.0705692	0.157423	0	0		E3 ubiquitin-protein ligase Hakai, transcript variant X2
AARA21_001356	7005.9	0.314316	1.24342	0.262015	0.190727	0.323814	0	0		protein CNPPD1, transcript variant X2
AARA21_001357	25627.6	-0.229818	0.852742	0.160262	0.133664	0.250693	0	0		tissue inhibitor of metalloproteinase
AARA21_001358	85.833	0.36821	1.29075	0.664522	0.141022	0.260297	0	0		uncharacterized protein K02A2.6-like, transcript variant X2
AARA21_001360	1337.55	-0.435633	0.739369	0.258576	0.0584535	0.137499	0	0		U6 snRNA-associated Sm-like protein LSm7
AARA21_001361	14.7553	0.355673	1.27958	0.514767	0.244391	0.387216	0	0		uncharacterized LOC120904095
AARA21_001362	5631.14	-0.00705163	0.995124	0.1246	0.95311	0.970841	0	0		cytochrome c oxidase assembly factor 7 homolog
AARA21_001363	18591.6	-0.252254	0.839583	0.21835	0.208467	0.345395	0	0		ras-related protein Rap1, transcript variant X2
AARA21_001364	3351.68	0.728972	1.65746	0.131808	1.27424e-08	4.71139e-07	1	0		ER membrane protein complex subunit 5
AARA21_001365	1397.53	-0.740877	0.598375	0.444685	0.0267691	0.0766611	0	0		kinesin-like protein Klp61F
AARA21_001366	1562.96	-0.350419	0.784356	0.492169	0.251877	0.396004	0	0		uncharacterized LOC120897955
AARA21_001367	1779.51	-0.0131541	0.990924	0.152072	0.934522	0.958007	0	0		N-acetylglucosamine-6-phosphate deacetylase
AARA21_001368	5070.71	0.0284996	1.01995	0.222602	0.880455	0.924872	0	0		protein FAM91A1
AARA21_001199	317.445	4.49667	22.5752	1.1524	4.17327e-06	6.82307e-05	1	1	up	uncharacterized LOC120901166
AARA21_001370	30141.1	0.889198	1.85215	0.248916	9.48369e-05	0.000909289	1	0		dual specificity protein phosphatase 3, transcript variant X4
AARA21_001371	471.964	-0.247045	0.842621	0.175395	0.134513	0.251619	0	0		uncharacterized protein F58A4.6
AARA21_001372	2724.19	-0.472961	0.720484	0.181526	0.00595362	0.0242554	0	0		calpain-7-like
AARA21_001373	5753.72	0.329497	1.25657	0.149465	0.0216149	0.0650419	0	0		UPF0518 protein AGAP011705, transcript variant X2
AARA21_001374	1770.59	-0.0700347	0.952615	0.165249	0.656308	0.773396	0	0		COMM domain-containing protein 4
AARA21_001375	3629.63	0.775591	1.71189	0.268799	0.00130602	0.00731267	1	0		uncharacterized LOC120896125
AARA21_001376	393.908	0.218904	1.16385	0.140271	0.10622	0.211404	0	0		mitochondrial dicarboxylate carrier-like, transcript variant X2
AARA21_001377	2994.96	0.302721	1.23347	0.230552	0.148222	0.26968	0	0		lysosomal Pro-X carboxypeptidase
AARA21_001378	3569.1	-0.549824	0.683104	0.248659	0.0134896	0.0457005	0	0		kanadaptin
AARA21_001379	4389.8	-0.00560595	0.996122	0.185426	0.972674	0.983451	0	0		solute carrier family 35 member F5, transcript variant X2
AARA21_001380	574.531	0.182854	1.13513	0.24396	0.41262	0.562891	0	0		transmembrane protein 53-B
AARA21_010379	77.8572	3.71389	13.1218	1.36785	0.000191365	0.00159993	1	1	up	fibrinogen C domain-containing protein 1-like
AARA21_001382	340.846	-0.261898	0.83399	0.337802	0.337	0.488453	0	0		uncharacterized LOC120894421
AARA21_009935	16.4764	3.70458	13.0374	1.16598	0.000121372	0.00111709	1	1	up	LOC120907409
AARA21_001384	516.143	0.0881306	1.06299	0.162175	0.568549	0.701258	0	0		YEATS domain-containing protein 4, transcript variant X2
AARA21_003715	1136.73	4.44787	21.8244	0.643553	2.30835e-13	2.58275e-11	1	1	up	retinol-binding protein pinta-like, transcript variant X2
AARA21_001387	2416.26	0.258642	1.19635	0.100227	0.010481	0.037691	0	0		protein Mo25-like
AARA21_001389	2639.2	-0.173651	0.886596	0.130017	0.171508	0.300162	0	0		transcription initiation factor TFIID subunit 12
AARA21_014020	34.0276	4.44108	21.7219	1.23203	1.01969e-05	0.000145297	1	1	up	scoloptoxin SSD976-like
AARA21_001391	47.9903	0.223088	1.16723	0.551215	0.367665	0.51939	0	0		uncharacterized protein K02A2.6-like
AARA21_001392	8.50672	0.287464	1.22049	0.53607	0.305104	0.453689	0	0		LOC120907722
AARA21_001393	3415.19	-0.84772	0.555662	0.196687	5.08237e-06	8.06348e-05	1	0		exportin-2
AARA21_001394	10987.7	0.742532	1.67311	0.289656	0.00362913	0.0163514	0	0		xaa-Pro aminopeptidase 1
AARA21_001395	191.068	-0.995834	0.501446	0.372086	0.00146745	0.0080245	1	0		uncharacterized LOC120903759
AARA21_001396	1116.43	0.43187	1.34898	0.300418	0.0928732	0.19203	0	0		iodotyrosine deiodinase 1
AARA21_001397	2643.71	-0.039482	0.973004	0.184278	0.842538	0.900921	0	0		probable ATP-dependent RNA helicase DHX35
AARA21_001398	18.4619	-0.306207	0.808766	0.537824	0.291648	0.439625	0	0		uncharacterized LOC120903982, transcript variant X2
AARA21_005440	49.8628	4.42952	21.5485	1.2808	1.88153e-05	0.000241373	1	1	up	uncharacterized LOC120903716
AARA21_001401	48.5968	-0.139388	0.907904	0.456649	0.63222	0.754198	0	0		uncharacterized protein K02A2.6-like
AARA21_001402	5295.33	0.484113	1.39873	0.258844	0.0355584	0.0944724	0	0		metal transporter CNNM4, transcript variant X3
AARA21_001404	1490.03	-0.24262	0.845209	0.136162	0.0664984	0.151012	0	0		conserved oligomeric Golgi complex subunit 4
AARA21_001406	268.224	0.308082	1.23806	0.350054	0.272334	0.418153	0	0		uncharacterized LOC120906746
AARA21_001409	1370.32	-0.304945	0.809473	0.152158	0.0362128	0.0958626	0	0		CUE domain-containing protein 2
AARA21_001410	316391	0.131409	1.09536	0.129554	0.30492	0.453516	0	0		40S ribosomal protein S3a
AARA21_001411	20.0821	-0.34126	0.789352	0.475704	0.269244	0.414944	0	0		uncharacterized LOC120897720
AARA21_001412	10.8162	0.112306	1.08095	0.462087	0.68217	0.793211	0	0		uncharacterized LOC120901917
AARA21_001413	10327	-0.392103	0.762018	0.137486	0.00320533	0.0148782	0	0		serine/threonine-protein phosphatase 2A 56 kDa regulatory subunit gamma isoform-like, transcript variant X1
AARA21_007971	157.626	4.4126	21.2973	0.999947	4.32767e-07	9.82084e-06	1	1	up	venom serine protease-like
AARA21_001416	14677.1	-0.483232	0.715373	0.207609	0.0120546	0.0419661	0	0		zinc finger protein 260-like, transcript variant X6
AARA21_001417	1.96546	-0.0483105	0.967068	0.512056	0.809382	0.880807	0	0		uncharacterized LOC120903235
AARA21_001418	1481.74	-0.0809794	0.945416	0.139113	0.541379	0.679403	0	0		uncharacterized LOC120897061
AARA21_001419	1395.73	0.0868977	1.06208	0.38583	0.752058	0.843361	0	0		uncharacterized LOC120904168, transcript variant X1
AARA21_001420	2510.74	0.908615	1.87724	0.246509	6.38181e-05	0.000648831	1	0		uncharacterized LOC120908770
AARA21_001421	6.47156	0.107883	1.07765	0.505221	0.663598	0.778351	0	0		uncharacterized LOC120908276, transcript variant X2
AARA21_001422	3379.55	-0.0457693	0.968773	0.135931	0.716281	0.818362	0	0		syntaxin-18
AARA21_001423	1896.42	-0.30733	0.808136	0.186841	0.0790554	0.171218	0	0		deubiquitinase OTUD6B
AARA21_001325	207.068	4.40231	21.1459	0.808151	2.37537e-09	1.03606e-07	1	1	up	venom serine protease-like
AARA21_001425	2.37241	0.195241	1.14492	0.568351	0.343355	0.495397	0	0		LOC120907868
AARA21_001427	4616.3	-0.264817	0.832304	0.136251	0.0398582	0.103524	0	0		hepatocyte growth factor-regulated tyrosine kinase substrate, transcript variant X1
AARA21_001428	2.01011	0.523812	1.43775	0.872009	0.0474921	0.117765	0	0		uncharacterized LOC120894471
AARA21_001429	215.985	0.0297109	1.02081	0.238627	0.887534	0.92943	0	0		zinc finger protein 525-like, transcript variant X2
AARA21_001431	11934.5	0.254933	1.19328	0.207521	0.186902	0.31916	0	0		WD repeat domain phosphoinositide-interacting protein 2, transcript variant X2
AARA21_000477	33.6791	3.65089	12.5611	0.817155	3.53267e-07	8.20484e-06	1	1	up	gustatory receptor for bitter taste 66a-like
AARA21_001433	23.994	-0.549989	0.683026	0.430865	0.0857724	0.18125	0	0		uncharacterized LOC120906267
AARA21_001434	1512.56	1.99296	3.98053	1.40941	0.00448833	0.0193666	0	1		ejaculatory bulb-specific protein 3-like
AARA21_001435	3571.52	-0.0556592	0.962155	0.147784	0.694915	0.801782	0	0		protein RUFY3, transcript variant X6
AARA21_001436	233.854	-0.149615	0.901491	0.330239	0.576499	0.70747	0	0		uncharacterized LOC120896073
AARA21_001437	4.46089	0.0710147	1.05046	0.488908	0.781898	0.863675	0	0		uncharacterized LOC120904881, transcript variant X3
AARA21_001438	739.265	0.62219	1.53921	0.368668	0.0361466	0.095778	0	0		iron-sulfur cluster co-chaperone protein HscB
AARA21_001439	23542.1	0.127084	1.09208	0.238007	0.557808	0.692255	0	0		protein ref(2)P
AARA21_001440	13171.2	0.492738	1.40711	0.336432	0.0762747	0.166626	0	0		nuclear factor NF-kappa-B p110 subunit, transcript variant X2
AARA21_001441	12112.6	-0.0179702	0.987621	0.167357	0.908233	0.941296	0	0		alanine--tRNA ligase, cytoplasmic
AARA21_001444	3538.98	-0.151624	0.900237	0.174848	0.368156	0.519718	0	0		ADP-ribosylation factor 6, transcript variant X2
AARA21_001445	22317.5	-0.142106	0.906195	0.133133	0.271069	0.416907	0	0		ras-related protein Rab-11A, transcript variant X1
AARA21_001446	236.659	0.560718	1.475	0.282166	0.0231239	0.0683831	0	0		zinc finger protein 423 homolog, transcript variant X2
AARA21_001448	32.9207	-0.0521182	0.964519	0.407348	0.850412	0.906115	0	0		uncharacterized LOC120905723
AARA21_001449	17725.9	0.261629	1.19883	0.353179	0.358445	0.510472	0	0		Krueppel-like factor luna, transcript variant X6
AARA21_001450	9820.51	0.0693688	1.04926	0.147414	0.645736	0.765283	0	0		AFG3-like protein 2
AARA21_001451	3158.63	0.0975608	1.06996	0.172719	0.547141	0.683833	0	0		glycoprotein-N-acetylgalactosamine 3-beta-galactosyltransferase 1-like
AARA21_001454	13612.8	-0.356118	0.781264	0.243182	0.103417	0.207301	0	0		pre-rRNA 2'-O-ribose RNA methyltransferase FTSJ3
AARA21_001455	1361.89	0.354791	1.2788	0.232747	0.0927651	0.191837	0	0		uncharacterized LOC120900496, transcript variant X1
AARA21_001457	12623.4	0.247102	1.18682	0.21206	0.218188	0.356499	0	0		putative SERF-like protein
AARA21_014509	6933.78	3.64044	12.4705	0.824686	4.51638e-07	1.01951e-05	1	1	up	brachyurin-like
AARA21_001459	162.971	-0.260062	0.835052	0.320384	0.326646	0.477609	0	0		neural-cadherin-like
AARA21_001460	98.0408	0.327688	1.255	0.449095	0.284468	0.431532	0	0		pro-resilin-like, transcript variant X1
AARA21_001461	2758.1	-0.218546	0.859431	0.111407	0.0460594	0.115234	0	0		PDZ domain-containing protein 8
AARA21_014720	677.606	4.33769	20.2197	0.664355	3.47148e-12	3.01807e-10	1	1	up	venom serine protease-like, transcript variant X2
AARA21_002879	2274.45	4.33254	20.1476	1.12371	4.64253e-06	7.50445e-05	1	1	up	peptidoglycan-recognition protein SC2-like
AARA21_001468	52.4836	-0.535917	0.68972	0.46318	0.101872	0.204971	0	0		U4/U6 small nuclear ribonucleoprotein Prp3-like
AARA21_003661	72.689	4.32705	20.0711	0.882297	4.79643e-08	1.46593e-06	1	1	up	uncharacterized LOC120898597
AARA21_001470	546.426	-0.398814	0.758481	0.170259	0.0140655	0.0470936	0	0		uncharacterized LOC120902975
AARA21_001471	3526.47	0.189601	1.14045	0.191092	0.292433	0.440034	0	0		geranylgeranyl transferase type-2 subunit beta
AARA21_001473	8.47891	0.358067	1.28171	0.619053	0.181647	0.312635	0	0		uncharacterized LOC120903238
AARA21_001474	4237.37	-0.178544	0.883594	0.227609	0.36183	0.513814	0	0		structural maintenance of chromosomes protein 3, transcript variant X1
AARA21_001475	4559.73	0.550296	1.46439	0.260997	0.0174894	0.0555353	0	0		isovaleryl-CoA dehydrogenase, mitochondrial
AARA21_001476	11.1189	0.294577	1.22653	0.506855	0.318772	0.468919	0	0		uncharacterized LOC120894992
AARA21_001477	26980.2	1.28583	2.43823	0.594314	0.00320644	0.0148782	0	1		uncharacterized LOC120893541
AARA21_001478	4.3622	-0.301657	0.81132	0.59552	0.236433	0.378286	0	0		uncharacterized LOC120896805
AARA21_001479	1810.62	-0.881242	0.5429	0.322896	0.00161227	0.00859721	1	0		polyribonucleotide nucleotidyltransferase 1, mitochondrial
AARA21_001480	15.2536	0.202306	1.15054	0.54835	0.389544	0.54134	0	0		uncharacterized protein K02A2.6-like
AARA21_001481	2139.5	-0.0609955	0.958602	0.175365	0.712532	0.815744	0	0		uncharacterized LOC120905827
AARA21_001482	388.32	-0.452545	0.730753	0.230266	0.0321475	0.08765	0	0		zinc finger protein 771-like
AARA21_001483	1483.96	0.206461	1.15385	0.225953	0.322672	0.473196	0	0		segmentation protein Runt-like, transcript variant X1
AARA21_001484	5443.59	0.403114	1.32236	0.200302	0.0310468	0.0853737	0	0		cystatin-like protein, transcript variant X2
AARA21_009069	45.4763	4.31663	19.9267	1.91355	0.000424523	0.00303632	1	1	up	peroxidase-like
AARA21_001487	1659.01	-0.0168934	0.988359	0.266231	0.940008	0.961759	0	0		uncharacterized LOC120895065, transcript variant X1
AARA21_001488	1805.67	-0.291649	0.816968	0.231749	0.162288	0.288659	0	0		CCA tRNA nucleotidyltransferase 1, mitochondrial, transcript variant X1
AARA21_001489	5158.51	-0.417699	0.748618	0.205153	0.0282892	0.0795621	0	0		uncharacterized LOC120895084, transcript variant X6
AARA21_001490	14435.1	0.138341	1.10064	0.190126	0.415356	0.565059	0	0		mitoferrin, transcript variant X1
AARA21_001491	4330.29	0.729297	1.65783	0.356128	0.0133359	0.0452633	0	0		solute carrier family 28 member 3-like
AARA21_001492	2614.16	0.984575	1.97873	0.536569	0.0114214	0.0402518	0	0		nidogen
AARA21_007007	584.559	3.61915	12.2877	0.869117	1.44573e-06	2.74773e-05	1	1	up	apyrase-like
AARA21_001494	4.63764	0.0438181	1.03084	0.544215	0.764026	0.851513	0	0		uncharacterized LOC120897639
AARA21_001495	5.10057	0.513191	1.4272	0.739715	0.0954127	0.195833	0	0		uncharacterized LOC120901075
AARA21_001496	24629.8	-0.211666	0.86354	0.111297	0.0504789	0.123294	0	0		protein transport protein Sec61 subunit alpha
AARA21_001497	7236.61	0.0511243	1.03607	0.169987	0.759502	0.848456	0	0		actin-related protein 3
AARA21_001499	2490.8	0.0542993	1.03835	0.241024	0.807096	0.879406	0	0		protein Notchless
AARA21_001500	7.51769	0.585787	1.50086	1.05396	0.0161227	0.052294	0	0		uncharacterized LOC120898000
AARA21_001502	51703.4	-0.202941	0.868778	0.13945	0.128458	0.243319	0	0		exportin-1, transcript variant X12
AARA21_001503	4.80323	0.071615	1.05089	0.503505	0.765447	0.852654	0	0		uncharacterized LOC120900091
AARA21_001504	3676.02	-0.258779	0.835795	0.275941	0.281465	0.428036	0	0		uncharacterized LOC120897073
AARA21_001506	4227.69	0.00473139	1.00328	0.144417	0.979739	0.987947	0	0		dedicator of cytokinesis protein 9, transcript variant X6
AARA21_001507	182.485	0.392912	1.31304	0.481215	0.21507	0.353091	0	0		uncharacterized LOC120901948
AARA21_012062	5.60676	3.51348	11.4199	1.63446	0.00133262	0.00742416	1	1	up	LOC120907359
AARA21_001510	3358.03	-0.568687	0.67423	0.15132	9.25546e-05	0.000892372	1	0		PAX-interacting protein 1-like, transcript variant X2
AARA21_001511	17968.6	-0.215559	0.861212	0.169007	0.19825	0.333144	0	0		dnaJ homolog subfamily C member 2
AARA21_001512	839.333	0.294831	1.22674	0.276963	0.223934	0.363211	0	0		neural-cadherin-like
AARA21_001513	867.86	0.0474463	1.03343	0.2374	0.804835	0.877991	0	0		uncharacterized LOC120895651
AARA21_001515	3615.61	0.59297	1.50835	0.135118	6.11816e-06	9.45046e-05	1	0		molybdopterin synthase catalytic subunit
AARA21_001516	31.5457	0.0098935	1.00688	0.407337	0.976047	0.985756	0	0		uncharacterized LOC120897725
AARA21_001517	8534.31	0.547864	1.46192	0.0974203	1.05537e-08	3.99397e-07	1	0		adrenodoxin-like protein 2, mitochondrial
AARA21_001518	10237.9	0.980228	1.97278	0.538094	0.0115407	0.0405731	0	0		rhythmically expressed gene 5 protein
AARA21_001519	19.0342	1.76947	3.4093	1.11948	0.00461334	0.019813	0	1		uncharacterized LOC120895260
AARA21_001520	42934.3	0.215264	1.16092	0.236239	0.285766	0.432684	0	0		uncharacterized LOC120902010
AARA21_001522	11894.4	0.0392552	1.02758	0.256822	0.867523	0.917433	0	0		protein disulfide-isomerase A6 homolog
AARA21_001523	5820.73	0.999105	1.99876	0.286738	0.000109085	0.00102154	1	0		ATPase inhibitor A, mitochondrial
AARA21_001524	1831.82	-0.479343	0.717304	0.195953	0.00837788	0.0316947	0	0		DNA topoisomerase 3-beta
AARA21_001525	10.7955	-0.102716	0.931278	0.503271	0.668728	0.782343	0	0		uncharacterized LOC120906566
AARA21_001526	44.8625	0.258999	1.19665	0.449198	0.381203	0.532856	0	0		protein A16
AARA21_001527	14900	0.118718	1.08577	0.204902	0.535682	0.675085	0	0		putative phosphatidate phosphatase
AARA21_001528	145.314	-0.0244814	0.983174	0.327532	0.920218	0.949134	0	0		uncharacterized LOC120904441
AARA21_001529	5.97426	-0.0221438	0.984768	0.517534	0.886644	0.92894	0	0		uncharacterized LOC120900209
AARA21_001530	786489	-0.217105	0.86029	0.220246	0.282017	0.428622	0	0		uncharacterized LOC120905903, transcript variant X2
AARA21_001531	6898.43	0.235079	1.17697	0.20422	0.217324	0.355405	0	0		extracellular sulfatase SULF-1 homolog, transcript variant X2
AARA21_006009	918.447	4.29596	19.6432	0.519149	6.41913e-18	1.83544e-15	1	1	up	uncharacterized protein C11D3.03c, transcript variant X2
AARA21_001533	2.56229	0.0782722	1.05575	0.547212	0.638224	0.759177	0	0		uncharacterized LOC120895898
AARA21_001534	2245.69	-0.183221	0.880735	0.29955	0.478095	0.624787	0	0		uncharacterized LOC120904653, transcript variant X1
AARA21_001535	114519	0.202698	1.15085	0.135762	0.122152	0.234062	0	0		60S ribosomal protein L35a
AARA21_001536	769.147	-0.357214	0.780671	0.167889	0.0252235	0.0730806	0	0		ARL14 effector protein
AARA21_001537	200.774	0.183326	1.1355	0.356178	0.514164	0.65678	0	0		DE-cadherin-like
AARA21_001538	12201.7	-0.276087	0.825828	0.140265	0.0422932	0.108339	0	0		GTPase HRas
AARA21_001539	4501.61	-0.61505	0.652907	0.241496	0.00472816	0.0201715	0	0		LIM domain-containing protein jub, transcript variant X4
AARA21_001540	55.6596	-0.218858	0.859245	0.384213	0.445587	0.594624	0	0		glutamate receptor ionotropic, kainate 5-like
AARA21_001541	3089.65	0.785816	1.72407	0.665742	0.0439677	0.111321	0	0		uncharacterized LOC120903586
AARA21_001543	1157.07	0.60621	1.52226	0.233424	0.00436938	0.0189743	0	0		ATP-binding cassette sub-family G member 8, transcript variant X2
AARA21_001544	2688.11	0.767806	1.70268	0.254424	0.000852471	0.00521328	1	0		cGMP-dependent protein kinase, isozyme 1, transcript variant X1
AARA21_001545	6332.85	0.0141296	1.00984	0.130953	0.941247	0.962797	0	0		TOX high mobility group box family member 4-like, transcript variant X2
AARA21_001548	1.67928	0.161734	1.11863	0.576711	0.301524	0.449925	0	0		uncharacterized LOC120906369, transcript variant X1
AARA21_001549	4862.76	-0.233285	0.850696	0.310767	0.372352	0.52407	0	0		uncharacterized LOC120897117
AARA21_001550	1662.69	0.0790039	1.05629	0.224095	0.7047	0.809785	0	0		uncharacterized LOC120894956
AARA21_001551	380.426	1.52392	2.8757	0.772666	0.00344237	0.015723	0	1		uncharacterized LOC120901225
AARA21_001221	15.3652	4.28257	19.4617	1.07822	2.73369e-06	4.71583e-05	1	1	up	serine protease grass-like
AARA21_001554	2354.78	0.348041	1.27283	0.129521	0.00572252	0.0235095	0	0		cysteine protease ATG4D, transcript variant X1
AARA21_001556	14.6972	-0.43604	0.73916	0.557187	0.176082	0.305558	0	0		uncharacterized LOC120897717
AARA21_001557	829.248	-0.161935	0.893825	0.17251	0.338602	0.490153	0	0		rRNA methyltransferase 3, mitochondrial
AARA21_001108	2859.75	4.28221	19.457	0.536808	6.23384e-17	1.42994e-14	1	1	up	uncharacterized LOC120900705
AARA21_001559	4692.35	0.751226	1.68322	0.288218	0.00316414	0.0147138	0	0		adenosine deaminase 2-like
AARA21_001560	370.771	0.0204306	1.01426	0.227958	0.923293	0.950934	0	0		uncharacterized LOC120896446, transcript variant X4
AARA21_001561	10947.6	0.193604	1.14362	0.231866	0.361514	0.51373	0	0		P protein-like, transcript variant X5
AARA21_001562	23.9089	0.0721422	1.05128	0.452791	0.797356	0.873527	0	0		uncharacterized LOC120908301
AARA21_001566	2426.14	-0.744748	0.596772	0.268081	0.00207314	0.0105393	0	0		MRG/MORF4L-binding protein
AARA21_001567	13787.4	0.81557	1.75999	0.190102	5.98705e-06	9.27021e-05	1	0		GILT-like protein 1
AARA21_001568	873.654	-0.306882	0.808387	0.153945	0.037748	0.0992041	0	0		uncharacterized LOC120895258, transcript variant X2
AARA21_001569	1426.85	-0.0514995	0.964933	0.100024	0.596241	0.724236	0	0		solute carrier family 17 member 9
AARA21_001571	12493.5	-0.291698	0.81694	0.198035	0.114322	0.222641	0	0		Ig-like and fibronectin type-III domain-containing protein 1, transcript variant X3
AARA21_006372	224.789	4.27072	19.3026	1.02973	1.31976e-06	2.54593e-05	1	1	up	endochitinase-like
AARA21_001574	13135.1	0.297853	1.22931	0.165946	0.0601552	0.140449	0	0		uncharacterized LOC120895280, transcript variant X2
AARA21_001575	602.621	-0.432452	0.741002	0.219884	0.0320656	0.0874682	0	0		uncharacterized LOC120895610, transcript variant X6
AARA21_001576	24854.7	0.594986	1.51046	0.299854	0.0218662	0.0655128	0	0		collagen alpha-1(IV) chain, transcript variant X1
AARA21_001577	3.63108	-2.72338	0.151419	2.07379	0.00376362	0.0168206	0	1		LOC120906241
AARA21_001579	8.9438	-0.0357628	0.975516	0.49021	0.882955	0.926671	0	0		LOC120893736
AARA21_001580	64.823	0.0470494	1.03315	0.314847	0.858619	0.912065	0	0		uncharacterized LOC120902595
AARA21_005936	1345.88	4.25881	19.1438	0.668349	9.57625e-12	7.46774e-10	1	1	up	lysosomal alpha-mannosidase-like, transcript variant X2
AARA21_001582	4762.72	0.291574	1.22397	0.133269	0.0242736	0.0709836	0	0		ras-related protein Rab-18-B
AARA21_001583	1537.37	-0.511138	0.701669	0.153194	0.000511653	0.00351117	1	0		protein ST7 homolog
AARA21_001584	7087.81	-0.00654485	0.995474	0.127503	0.996273	0.997979	0	0		putative uncharacterized protein DDB_G0291608, transcript variant X1
AARA21_001585	9664.2	-0.250717	0.840478	0.181682	0.145677	0.266444	0	0		transmembrane protein 134, transcript variant X2
AARA21_001586	917.109	0.0308702	1.02163	0.272885	0.904211	0.939273	0	0		transcription factor mef2A-like, transcript variant X5
AARA21_001587	1781.56	-0.181828	0.881585	0.127118	0.150681	0.273073	0	0		autophagy-related protein 16-1, transcript variant X2
AARA21_001589	9089.38	0.148595	1.10849	0.276534	0.54081	0.679119	0	0		prostaglandin reductase 1-like
AARA21_001590	10219.8	0.177888	1.13123	0.303241	0.490543	0.636335	0	0		neuronal acetylcholine receptor subunit alpha-7, transcript variant X1
AARA21_001591	2428.66	-0.102151	0.931643	0.340721	0.705571	0.810515	0	0		myrosinase 1-like
AARA21_001592	1256.02	0.00674322	1.00468	0.29582	0.987839	0.992544	0	0		G-protein coupled receptor dmsr-1-like, transcript variant X1
AARA21_001593	2882.92	0.647986	1.56698	0.209358	0.000888311	0.00536615	1	0		xenotropic and polytropic retrovirus receptor 1, transcript variant X3
AARA21_001594	76.2654	0.78522	1.72336	0.294539	0.00231613	0.0115064	0	0		T-cell leukemia homeobox protein 3, transcript variant X1
AARA21_001595	9820.91	-0.267542	0.830734	0.166825	0.0950741	0.195418	0	0		cullin-associated NEDD8-dissociated protein 1
AARA21_001597	1384.87	0.10567	1.07599	0.19209	0.539237	0.678038	0	0		OCIA domain-containing protein 1
AARA21_001598	427.265	0.128944	1.09349	0.250108	0.576805	0.707574	0	0		tRNA-splicing endonuclease subunit Sen34
AARA21_001599	67.4016	-0.678747	0.624708	0.570084	0.0610378	0.141739	0	0		LOC120901051
AARA21_001600	702.915	0.1396	1.1016	0.307266	0.591535	0.720015	0	0		uncharacterized LOC120895011
AARA21_001601	14.0008	-0.0351456	0.975933	0.405598	0.904276	0.939273	0	0		uncharacterized LOC120893924, transcript variant X2
AARA21_001602	9546.79	-0.630343	0.646023	0.263056	0.00723584	0.0282046	0	0		lysosomal-trafficking regulator
AARA21_001603	30.3998	-0.401142	0.757258	0.385377	0.177678	0.307407	0	0		uncharacterized LOC120905086, transcript variant X1
AARA21_001604	17.6978	-0.670124	0.628453	0.703295	0.0625988	0.144451	0	0		LOC120905225
AARA21_001606	6233.81	-0.537685	0.688876	0.0982174	2.64127e-08	8.82735e-07	1	0		golgin subfamily A member 2
AARA21_001607	4856.2	0.0901666	1.06449	0.229599	0.668216	0.781915	0	0		H(+)/Cl(-) exchange transporter 7, transcript variant X1
AARA21_001608	5771.77	0.64069	1.55907	0.34365	0.0247957	0.0721008	0	0		uncharacterized LOC120895889
AARA21_001610	1010.83	-0.285369	0.820532	0.292203	0.258049	0.402698	0	0		probable small nuclear ribonucleoprotein Sm D1
AARA21_001611	804.538	0.980996	1.97383	0.34573	0.000993177	0.00585397	1	0		E3 ubiquitin-protein ligase TRIM37-like, transcript variant X3
AARA21_001614	3250.07	0.762033	1.69588	0.333131	0.00659071	0.0262791	0	0		dnaJ protein homolog 1
AARA21_001616	2374.46	-0.365699	0.776093	0.206418	0.0567232	0.134575	0	0		SPRY domain-containing SOCS box protein 3, transcript variant X2
AARA21_012044	2846.72	3.48791	11.2193	0.409517	7.39115e-19	2.64172e-16	1	1	up	cytochrome P450 6d3-like
AARA21_001618	90.5584	-0.946855	0.518762	0.55294	0.0143213	0.0477969	0	0		uncharacterized LOC120895547
AARA21_002151	487.014	4.23776	18.8666	0.775081	2.05683e-09	9.15751e-08	1	1	up	venom serine protease-like
AARA21_013786	45.5717	4.23431	18.8215	1.00514	1.0337e-06	2.07499e-05	1	1	up	uncharacterized LOC120900832
AARA21_001621	2250.46	0.24943	1.18874	0.250522	0.270638	0.416443	0	0		multiple C2 and transmembrane domain-containing protein, transcript variant X4
AARA21_001624	187.093	0.305775	1.23608	0.326444	0.257199	0.401876	0	0		protein gooseberry-neuro-like, transcript variant X1
AARA21_012071	27.7421	3.47831	11.1448	1.03395	2.92644e-05	0.000347046	1	1	up	ninjurin-1-like, transcript variant X3
AARA21_001626	8119.55	-0.457783	0.728104	0.3325	0.0950408	0.195381	0	0		luciferin sulfotransferase-like, transcript variant X2
AARA21_001628	5321.7	0.190503	1.14116	0.3581	0.499712	0.643752	0	0		C-type lectin 37Db-like
AARA21_001629	10825.8	-0.135728	0.910211	0.198473	0.463296	0.611719	0	0		protein sickie, transcript variant X7
AARA21_001630	6231.62	0.201383	1.1498	0.150124	0.164267	0.291293	0	0		uncharacterized LOC120898458
AARA21_001631	1.86177	-0.254887	0.838053	0.637399	0.0934468	0.193091	0	0		uncharacterized LOC120908278
AARA21_001632	17267.3	-0.166238	0.891164	0.17525	0.351659	0.50374	0	0		stress-induced-phosphoprotein 1
AARA21_001634	2486.92	0.408617	1.32741	0.288795	0.10138	0.204363	0	0		acyl-CoA Delta(11) desaturase
AARA21_001636	7.97049	-0.0649505	0.955978	0.478781	0.802406	0.876877	0	0		LOC120908141
AARA21_001638	8241.04	-0.221728	0.857538	0.191478	0.222147	0.361116	0	0		syntaxin-7
AARA21_001639	7246.02	-0.243422	0.844739	0.203423	0.200663	0.335785	0	0		oxysterol-binding protein-related protein 9
AARA21_001640	34.3552	0.789195	1.72811	0.896909	0.0434478	0.110439	0	0		uncharacterized LOC120897644, transcript variant X2
AARA21_001641	1428.68	1.0706	2.10031	0.975359	0.0218681	0.0655128	0	1		venom serine protease-like
AARA21_001643	7.55626	-0.14298	0.905647	0.529728	0.51696	0.659207	0	0		ovarian-specific serine/threonine-protein kinase Lok-like
AARA21_001644	47346.9	0.00843309	1.00586	0.206013	0.967607	0.979945	0	0		casein kinase II subunit alpha
AARA21_001645	238.24	1.14857	2.21695	0.532015	0.0041841	0.0183305	0	1		microfibril-associated glycoprotein 4-like
AARA21_001646	16000.2	0.410119	1.3288	0.193963	0.0241177	0.0706081	0	0		unconventional myosin ID, transcript variant X2
AARA21_001390	504.659	4.22307	18.6755	0.336797	2.85552e-37	1.22473e-33	1	1	up	uncharacterized LOC120906255, transcript variant X4
AARA21_015670	903.692	4.21147	18.5259	0.439738	5.64131e-23	4.0326e-20	1	1	up	monocarboxylate transporter 3, transcript variant X1
AARA21_001650	2252.46	-0.0667778	0.954768	0.197299	0.697207	0.803993	0	0		trafficking protein particle complex subunit 6b
AARA21_001651	472.17	0.0109033	1.00759	0.321059	0.972542	0.983395	0	0		DE-cadherin-like
AARA21_001652	11990	-0.109421	0.92696	0.284008	0.653816	0.771307	0	0		LOC120898378
AARA21_001653	3624.42	-0.144279	0.904831	0.118334	0.211941	0.349531	0	0		uncharacterized LOC120898763, transcript variant X1
AARA21_001654	2724.91	0.31085	1.24044	0.1583	0.0403258	0.10438	0	0		39S ribosomal protein L38, mitochondrial
AARA21_001655	1355.58	0.348024	1.27282	0.225719	0.0923329	0.191189	0	0		uncharacterized LOC120899975, transcript variant X5
AARA21_013740	379.72	4.18114	18.1404	1.14021	8.35894e-06	0.000123911	1	1	up	nose resistant to fluoxetine protein 6-like
AARA21_001657	1938.77	-0.54174	0.686942	0.157456	0.000327729	0.00248052	1	0		bromodomain-containing protein 1
AARA21_001658	53.3317	0.663983	1.58445	0.981125	0.0422242	0.108192	0	0		uncharacterized LOC120894986
AARA21_001659	290.296	-0.548882	0.68355	0.351041	0.0550017	0.131446	0	0		uncharacterized LOC120898243
AARA21_001660	11.2503	0.0502704	1.03546	0.463991	0.845146	0.902536	0	0		uncharacterized LOC120896820
AARA21_001661	42648	0.390739	1.31106	0.29739	0.129425	0.244755	0	0		protein alan shepard, transcript variant X1
AARA21_001663	21.8057	-0.100272	0.932857	0.461474	0.716076	0.818238	0	0		uncharacterized LOC120903405
AARA21_001665	1288.2	0.090253	1.06456	0.156204	0.548879	0.685007	0	0		CTTNBP2 N-terminal-like protein, transcript variant X2
AARA21_001666	8.64917	-1.72325	0.302866	2.13201	0.0081109	0.0308727	0	1		LOC120893832
AARA21_001667	11175.4	-0.427284	0.743661	0.180098	0.0105464	0.0378839	0	0		structural maintenance of chromosomes protein 6-like, transcript variant X2
AARA21_001668	942.525	0.942587	1.92197	0.264882	9.20566e-05	0.000889078	1	0		vitellogenic carboxypeptidase-like, transcript variant X1
AARA21_001669	123.669	1.17261	2.25419	0.69007	0.00929068	0.0345301	0	1		uncharacterized LOC120898291
AARA21_001670	1284.16	0.266406	1.20281	0.309965	0.310502	0.459803	0	0		uncharacterized LOC120900906
AARA21_001671	4.16294	-0.00162967	0.998871	0.521072	0.985353	0.99113	0	0		oxidative stress-induced growth inhibitor 2-like
AARA21_001672	6.42499	-0.160302	0.894838	0.531676	0.481069	0.628099	0	0		uncharacterized LOC120895793
AARA21_001673	4674.27	-0.0569412	0.9613	0.248742	0.811155	0.881952	0	0		polyadenylate-binding protein 2
AARA21_001674	7008.71	-0.578997	0.669429	0.18174	0.00074828	0.00469536	1	0		uncharacterized LOC120908406
AARA21_001675	3.922	0.849235	1.80154	1.46816	0.0215514	0.0649569	0	0		uncharacterized LOC120906609, transcript variant X3
AARA21_001676	5914.6	0.0193267	1.01349	0.238309	0.937597	0.959903	0	0		methionine--tRNA ligase, cytoplasmic
AARA21_001677	3446.86	0.434078	1.35105	0.21863	0.0287179	0.0804688	0	0		carboxypeptidase M, transcript variant X5
AARA21_001678	2242.74	-0.885684	0.541231	0.371156	0.0035704	0.0161478	0	0		G1/S-specific cyclin-E
AARA21_001679	20.7444	0.264478	1.2012	0.378718	0.362009	0.514011	0	0		uncharacterized LOC120905986, transcript variant X1
AARA21_001680	2832.68	-0.199126	0.871078	0.194839	0.274429	0.420167	0	0		probable ATP-dependent RNA helicase DDX52
AARA21_001681	947.001	-0.30545	0.80919	0.275689	0.20822	0.345081	0	0		selenoprotein H-like
AARA21_001682	53.8254	1.47992	2.78933	1.49114	0.0104165	0.0375536	0	1		uncharacterized LOC120904281, transcript variant X4
AARA21_001683	2979.55	-0.0493307	0.966385	0.20806	0.783912	0.864982	0	0		dynein assembly factor 5, axonemal, transcript variant X1
AARA21_001684	3010.06	0.568198	1.48267	0.158794	0.000201126	0.00166853	1	0		homeobox protein B-H2, transcript variant X1
AARA21_001686	298.1	-0.714983	0.609212	0.215825	0.000415739	0.00298844	1	0		zinc finger protein 239-like
AARA21_001687	8128.76	0.225094	1.16885	0.14799	0.118932	0.22918	0	0		cell cycle control protein 50A
AARA21_001688	37.2957	1.07965	2.11352	0.529607	0.00610619	0.0247148	0	1		uncharacterized LOC120897672
AARA21_001690	209.599	1.34981	2.54878	0.586848	0.00214923	0.0108235	0	1		uncharacterized LOC120902347
AARA21_004359	1995.89	3.46367	11.0324	0.608861	6.48834e-10	3.16233e-08	1	1	up	transmembrane protease serine 9-like
AARA21_001692	95.0807	0.315282	1.24426	0.377681	0.280553	0.427104	0	0		dynein assembly factor 1, axonemal homolog
AARA21_001693	860.852	0.210043	1.15672	0.208104	0.288874	0.436312	0	0		guided entry of tail-anchored proteins factor 1-like
AARA21_001695	1173.61	-0.216312	0.860763	0.216305	0.278856	0.425237	0	0		DNA replication licensing factor Mcm5
AARA21_001696	11538	0.551889	1.466	0.379311	0.0657325	0.149828	0	0		uncharacterized LOC120898200
AARA21_001698	8970.56	-0.246488	0.842946	0.141248	0.0711642	0.158212	0	0		protein crumbs, transcript variant X2
AARA21_001699	2254.03	-0.710564	0.611081	0.280597	0.00406354	0.0179183	0	0		uncharacterized LOC120894776, transcript variant X1
AARA21_001700	2826.63	-0.198888	0.871222	0.201104	0.279574	0.426067	0	0		menin
AARA21_001701	76.6589	0.927964	1.90259	0.334104	0.00126253	0.00711564	1	0		homeotic protein empty spiracles-like
AARA21_001704	3022.31	0.00121238	1.00084	0.27603	0.972187	0.98319	0	0		uncharacterized LOC120895015
AARA21_001705	12682.3	-0.00589708	0.995921	0.150762	0.964696	0.978037	0	0		epidermal growth factor receptor, transcript variant X2
AARA21_001706	668.142	-0.155314	0.897937	0.146732	0.260191	0.404995	0	0		uncharacterized LOC120893576
AARA21_001707	11537.5	0.529112	1.44304	0.305699	0.0407862	0.105317	0	0		vegetative cell wall protein gp1-like, transcript variant X1
AARA21_001708	23.7949	0.0798167	1.05688	0.431956	0.77785	0.860658	0	0		uncharacterized LOC120896039
AARA21_001710	20403.7	-0.303295	0.810399	0.28502	0.217045	0.355217	0	0		short/branched chain specific acyl-CoA dehydrogenase, mitochondrial
AARA21_001711	3259.99	0.23267	1.17501	0.14691	0.10106	0.203915	0	0		E3 ubiquitin-protein ligase MARCHF5-like, transcript variant X1
AARA21_004136	552.844	3.37826	10.3982	0.482306	1.44006e-13	1.69993e-11	1	1	up	chitin synthase chs-2, transcript variant X2
AARA21_001713	4170.54	-0.0821023	0.94468	0.173482	0.628303	0.750708	0	0		mediator of RNA polymerase II transcription subunit 19
AARA21_001714	215.561	0.049939	1.03522	0.291276	0.843028	0.900933	0	0		tubulin polymerization-promoting protein homolog, transcript variant X2
AARA21_001715	2.84441	-0.0841521	0.943339	0.54016	0.635216	0.756631	0	0		large subunit ribosomal RNA
AARA21_001716	21.9995	-1.11396	0.462024	0.966027	0.0208768	0.0634623	0	1		uncharacterized LOC120905924, transcript variant X1
AARA21_001718	26290.9	-0.143968	0.905026	0.245908	0.51324	0.656382	0	0		protein SDA1 homolog
AARA21_013307	34.0941	3.37273	10.3584	0.772146	5.57337e-07	1.21341e-05	1	1	up	venom allergen 3-like
AARA21_001720	1781.08	0.0348215	1.02443	0.177062	0.837621	0.898438	0	0		39S ribosomal protein L11, mitochondrial
AARA21_001721	11221	-0.171491	0.887925	0.14368	0.216159	0.354173	0	0		coiled-coil domain-containing protein 6
AARA21_001723	18400.2	0.0768372	1.0547	0.153318	0.603025	0.730174	0	0		WW domain-binding protein 2
AARA21_001724	45688.2	-0.0452663	0.969111	0.130321	0.719469	0.820742	0	0		ubiquitin-like modifier-activating enzyme 1, transcript variant X5
AARA21_001725	51.8019	0.984854	1.97911	0.389959	0.00227099	0.011304	0	0		intraflagellar transport protein 88 homolog
AARA21_001727	11138.4	0.647267	1.5662	0.296513	0.0121403	0.042195	0	0		uncharacterized LOC120908575
AARA21_001728	2331.55	-0.436313	0.739021	0.173315	0.0075968	0.0293186	0	0		protein FAN-like
AARA21_001729	1009.51	-0.258013	0.836239	0.156415	0.084055	0.178589	0	0		SAGA-associated factor 11 homolog
AARA21_001730	18502.8	0.40476	1.32387	0.105696	7.2587e-05	0.000721217	1	0		uncharacterized LOC120897617, transcript variant X1
AARA21_001731	987.255	0.0271812	1.01902	0.231455	0.894579	0.933767	0	0		ras-GEF domain-containing family member 1B-like, transcript variant X2
AARA21_001732	814.993	-0.785046	0.580333	0.14265	1.42346e-08	5.17392e-07	1	0		beta-alanine-activating enzyme, transcript variant X1
AARA21_001735	3124.79	-0.0425154	0.970961	0.126016	0.719662	0.820839	0	0		TBC1 domain family member 20
AARA21_001736	13837.2	-0.471069	0.72143	0.182442	0.00618498	0.024963	0	0		nucleosome-remodeling factor subunit NURF301, transcript variant X2
AARA21_005532	3108.2	4.14876	17.7379	0.9545	5.82987e-07	1.25022e-05	1	1	up	uricase, transcript variant X2
AARA21_001738	45.6998	-0.692412	0.618818	0.49543	0.0482106	0.119167	0	0		uncharacterized LOC120895275
AARA21_001739	748.55	0.253922	1.19244	0.24006	0.242563	0.385173	0	0		LHFPL tetraspan subfamily member 3 protein, transcript variant X1
AARA21_001741	8302.84	-0.147913	0.902555	0.18958	0.405924	0.557241	0	0		myotubularin-related protein 8, transcript variant X2
AARA21_007109	18535.5	4.06732	16.7643	0.653904	2.5369e-11	1.80344e-09	1	1	up	carboxypeptidase B-like
AARA21_001744	57.8687	0.473901	1.38886	0.646679	0.12343	0.235904	0	0		uncharacterized LOC120908361
AARA21_001746	5.35959	0.986017	1.98071	1.13396	0.0267843	0.0766876	0	0		uncharacterized LOC120898408
AARA21_001747	4024.97	-0.31786	0.802259	0.25302	0.160762	0.286857	0	0		ruvB-like helicase 2
AARA21_001748	6274.48	0.116438	1.08406	0.184253	0.505632	0.649557	0	0		synaptic vesicular amine transporter, transcript variant X1
AARA21_001749	786.161	-0.480174	0.716891	0.268249	0.0386037	0.100938	0	0		tyrosine-protein kinase transmembrane receptor Ror2-like
AARA21_001750	6230.36	-0.493784	0.71016	0.15263	0.000753463	0.00471767	1	0		mucin-22-like, transcript variant X2
AARA21_002717	16.576	4.06718	16.7626	1.26637	5.00651e-05	0.000534064	1	1	up	uncharacterized LOC120905674
AARA21_001753	2258.76	0.486669	1.40121	0.321984	0.0690154	0.15516	0	0		insulin-like growth factor-binding protein complex acid labile subunit
AARA21_001755	5279.54	0.551475	1.46558	0.156958	0.000250467	0.00198784	1	0		UPF0184 protein AAEL002161-like
AARA21_001756	2233.09	0.42588	1.34339	0.327482	0.115237	0.224003	0	0		uncharacterized LOC120904833
AARA21_001757	22.7311	-0.568149	0.674482	0.583551	0.103661	0.207628	0	0		U11 spliceosomal RNA
AARA21_001758	32.703	-0.439069	0.73761	0.450825	0.16458	0.291608	0	0		uncharacterized LOC120898199
AARA21_001759	888.497	-0.475862	0.719037	0.349997	0.0946635	0.194792	0	0		leucine-rich melanocyte differentiation-associated protein-like
AARA21_001760	7953.01	-0.340447	0.789797	0.168269	0.0350525	0.0933665	0	0		chromobox protein homolog 3-like, transcript variant X2
AARA21_001761	858.117	-0.882074	0.542587	0.329503	0.00192795	0.00995405	1	0		uncharacterized LOC120897218
AARA21_001762	4862.41	-0.0310075	0.978737	0.227477	0.874768	0.921083	0	0		uncharacterized LOC120897901
AARA21_001763	10.3372	-0.0407077	0.972178	0.488795	0.868317	0.917896	0	0		uncharacterized LOC120905597
AARA21_001764	2387.65	0.268117	1.20423	0.170007	0.0986889	0.200447	0	0		39S ribosomal protein L16, mitochondrial
AARA21_001766	3416.4	0.493143	1.40751	0.180424	0.00379496	0.0169371	0	0		monocyte to macrophage differentiation factor, transcript variant X2
[truncated: 11,443 more rows]

## Sheet: 2d_RvUN(b)
gene	baseMean	log2FoldChange	Fold change	lfcSE	pvalue	padj	padj < 0.01	fold change >2	Up or down regulated	Product Description
[truncated: 12,867 more rows]

[truncated: 15 more sheets: 6d_RvM(b), 6d_UNvM(b), 6d_RvUN(b), 11d_RvM(b), 11d_UNvM(b), 11d_RvUN(b), Moz_6v2(b), Moz_11v2(b), Moz_6v11(b), UN_11v2(b), UN_6v11(b), UN_6v2(b), Res_11v2(b), Res_6v2(b), Res_6v11(b)]
