# Supplementary material for: Insecticide resistance is driven by distinct metabolic mechanisms across the lifespan of the major malaria vector Anopheles arabiensis
Source: Research Square preprint supplement (doi:10.21203/rs.3.rs-8682736/v1), 2026-02-02
Supplement: Supplementary file 3 [file 88710ae973b0486fed9236e0.xlsx]

## Sheet: Sheet1
Gene category	Gene_ID	Gene description	2d			6d		11d
			Res v Moz	Un v Moz	Res v Un	Res v Moz	Un v Moz	Res v Moz	Un v Moz
Cuticular	AARA21_000375	ns	<2	<2	<2	<2	<2	0.423717	<2
	AARA21_000641	CPR121	2.26108	5.09503	<2	<2	<2	<2	<2
	AARA21_001509	CPR70	<2	9.20186	0.198521	2.19061	<2	2.29201	3.11909
	AARA21_002332	CPR26	<2	4.40262	0.344746	2.59899	<2	<2	<2
	AARA21_002509	CPR79	8.37897	4.64	<2	2.03951	<2	<2	<2
	AARA21_002597	CPR10	<2	<2	<2	3.02732	3.13743	<2	<2
	AARA21_002987	CPR125	12.6803	6.93529	<2	<2	<2	<2	<2
	AARA21_003054	CPF2	2.18765	58.9818	<2	<2	<2	<2	<2
	AARA21_003136	CPR5	<2	26.2661	0.179722	<2	<2	<2	<2
	AARA21_003875	CPR16	<2	4.00702	0.366103	2.99025	2.5423	<2	<2
	AARA21_003903	Cuticular protein RR-2 family 110	37.7224	7.59208	3.58625	4.57509	2.63196	<2	<2
	AARA21_003964	Nkd	<2	<2	<2	<2	2.04052	<2	<2
	AARA21_004652	CPR15	<2	2.39847	0.235587	2.5597	<2	<2	<2
	AARA21_004875	CPR75	3.58629	6.23483	<2	7.58864	<2	<2	<2
	AARA21_004954	CPR60	0.200226	0.152373	<2	<2	<2	<2	<2
	AARA21_005494	CPLCG15	31.557	284.013	<2	<2	<2	<2	<2
	AARA21_005587	CPF1	2.00002	138.931	0.0353205	<2	<2	<2	<2
	AARA21_005750	ns	<2	2.78601	<2	<2	<2	<2	2.67857
	AARA21_006790	CPR120	9.55561	<2	6.26966	<2	<2	<2	<2
	AARA21_006796	CPLCX2	<2	<2	<2	2.33473	3.4689	<2	<2
	AARA21_007018	CPR2	<2	55.0662	0.0241081	<2	<2	<2	<2
	AARA21_007377	CPLCG5	8.20262	<2	<2	<2	<2	<2	<2
	AARA21_007699	CPFL2	<2	24.6248	<2	<2	<2	<2	<2
	AARA21_007992	ns	2.87806	7.26317	<2	<2	5.71222	<2	2.35713
	AARA21_008311	CPR86	3.62937	<2	<2	<2	<2	9.30099	<2
	AARA21_008557	CPR137	<2	41.6632	<2	<2	<2	<2	<2
	AARA21_008813	CPR27	3.33188	5.43648	<2	<2	<2	2.66093	6.57767
	AARA21_009175	CPLCG23	4.73726	4.29654	<2	<2	<2	<2	<2
	AARA21_009667	CPR115	13.263	<2	7.65819	<2	<2	<2	<2
	AARA21_009729	CPR3	<2	88.4468	0.0681726	<2	<2	<2	<2
	AARA21_010097	CPR116	3.07496	<2	2.88165	<2	<2	<2	<2
	AARA21_011438	CPR102	<2	4.06272	0.0772555	<2	<2	<2	<2
	AARA21_011809	ns	11.0915	6.80174	<2	<2	<2	<2	2.15548
	AARA21_011872	ns	<2	0.357938	3.0913	<2	<2	<2	<2
	AARA21_012020	CPR57	<2	<2	<2	<2	0.217592	<2	<2
	AARA21_012831	ns	5.19001	4.19792	<2	<2	<2	<2	<2
	AARA21_012984	CPLCG3	6.60783	2.47366	<2	<2	<2	<2	<2
	AARA21_013129	CPLCG1	<2	<2	<2	2.07939	<2	<2	<2
	AARA21_013223	CPR115	8.31113	<2	8.29274	<2	<2	<2	<2
	AARA21_013319	CPLCG4	29.6516	17.8891	<2	<2	<2	<2	<2
	AARA21_013417	CPF3	<2	<2	<2	0.454777	0.0861118	<2	<2
	AARA21_013565	ns	<2	2.97651	<2	<2	<2	<2	<2
	AARA21_014008	CPR124	2.71965	2.76423	<2	<2	<2	<2	<2
	AARA21_014141	CPLCX3	23.031	21.0939	<2	<2	<2	<2	<2
	AARA21_014485	CPR6	4.78047	36.4849	0.21782	<2	<2	<2	<2
	AARA21_014753	CPR127	4.99165	2.74501	<2	2.69358	<2	<2	<2
	AARA21_014940	CPR61	<2	<2	0.250781	6.36683	20.3215	3.91004	<2
	AARA21_015750	CPR30	0.453081	7.63914	0.0524634	2.06051	3.102	<2	<2
Detoxification	AARA21_000095	ns	2.09433	2.77599	<2	8.64604	11.1089	<2	<2
	AARA21_000305	CYP672	8.27081	6.11762	<2	10.3879	7.23295	6.80221	5.71503
	AARA21_000310	GSTT1	<2	<2	0.488474	<2	<2	<2	<2
	AARA21_000466	GSTD9	<2	57.7261	<2	<2	<2	<2	<2
	AARA21_000742	CYP9J5	2.28495	<2	<2	<2	<2	<2	<2
	AARA21_001486	CYP4C28	<2	2.52469	<2	<2	<2	2.13264	2.53407
	AARA21_001842	COEJHE2E	7.50224	6.26467	<2	6.73892	19.3932	<2	<2
	AARA21_002098	GSTD5	<2	28.7623	0.186923	<2	<2	<2	<2
	AARA21_002192	CYP6AF	2.49853	2.92191	<2	3.51841	3.57212	2.50206	<2
	AARA21_002420	CYP6P15P	<2	4.48054	<2	<2	<2	4.69162	4.69431
	AARA21_002791	COEBE2O	<2	2.53915	0.297799	<2	<2	<2	<2
	AARA21_003181	CYP6M3	4.55367	<2	<2	2.65083	<2	2.93024	<2
	AARA21_003870	CYP4J10	<2	<2	<2	<2	3.12939	<2	<2
	AARA21_004023	CYP6Y2	<2	<2	<2	<2	2.04273	<2	<2
	AARA21_004180	Cpr	2.59523	2.11017	<2	<2	<2	<2	<2
	AARA21_004196	CYP4G16	<2	2.45799	<2	5.40829	3.17764	2.1701	<2
	AARA21_004620	CYP9K1	12.4414	6.98028	<2	3.01139	2.52703	2.18826	<2
	AARA21_004634	CYP6AK1	2.60299	2.89953	<2	<2	<2	<2	<2
	AARA21_004780	GSTD3	3.56456	5.78527	<2	<2	<2	<2	<2
	AARA21_004845	CYP325K1	2.69748	<2	<2	<2	2.20258	2.81398	4.17119
	AARA21_005069	ns	0.481678	<2	0.448892	0.438699	<2	<2	<2
	AARA21_005226	CYP325J1	3.70115	2.6568	<2	<2	2.93311	<2	<2
	AARA21_005252	GSTS1	2.85933	3.47555	<2	<2	<2	<2	<2
	AARA21_005388	CYP6AA2	5.10974	3.26888	<2	2.20252	2.13684	2.91632	2.62046
	AARA21_005392	CYP6P1	5.46272	<2	2.75759	2.41546	2.02953	3.892	3.30698
	AARA21_007145	GSTD7	5.01476	2.56181	<2	3.91757	5.60717	4.84758	3.74675
	AARA21_007287	CYP4H27	<2	38.2594	0.0760186	<2	<2	<2	<2
	AARA21_007418	CYP6M1	<2	<2	2.1671	<2	<2	<2	<2
	AARA21_007645	ACE2	3.32488	<2	2.76632	<2	<2	<2	<2
	AARA21_007866	COEAE3H	2.20367	<2	<2	<2	<2	<2	<2
	AARA21_007882	CYP49A1	<2	2.79835	<2	<2	2.16063	<2	<2
	AARA21_008082	CYP9M1	4.14593	<2	<2	<2	<2	<2	<2
	AARA21_008086	CYP12F3	2.39401	<2	<2	<2	<2	<2	<2
	AARA21_008338	CYP4J9	2.38134	5.81269	<2	<2	<2	<2	<2
	AARA21_008486	CYP6R1	<2	<2	<2	<2	<2	0.403067	0.426219
	AARA21_008697	CYP9J4	2.53082	<2	<2	<2	<2	2.79365	2.03707
	AARA21_008783	CYP4C27	<2	<2	<2	<2	<2	<2	0.470456
	AARA21_008875	CYP4AA1	2.29271	2.08518	<2	<2	<2	<2	<2
	AARA21_009338	GSTU3	6.02174	<2	3.66942	2.74667	2.40574	<2	<2
	AARA21_009391	CYP9M1	<2	4.45484	0.194162	<2	<2	<2	<2
	AARA21_010118	COEBE2C	2.16613	4.03769	<2	2.0832	<2	<2	<2
	AARA21_010498	CYP4G17	3.5687	2.73439	<2	2.27502	2.66159	3.73819	2.36377
	AARA21_010702	CYP305A1	<2	<2	2.03794	<2	<2	<2	<2
	AARA21_010799	CYP4H19	8.54942	5.06591	<2	9.02687	6.76136	2.02177	<2
	AARA21_010843	CYP4H19	5.92733	2.19892	2.2007	8.76766	9.15296	2.17145	2.23968
	AARA21_010975	CYP6P3	105.841	46.6437	<2	11.5477	8.47124	8.8394	4.52434
	AARA21_011240	ACE	2.33173	<2	2.01865	<2	<2	<2	<2
	AARA21_011253	ns	2.07829	<2	<2	2.11842	<2	<2	<2
	AARA21_011275	CYP9J3	2.20343	<2	<2	<2	<2	<2	<2
	AARA21_011749	ns	<2	<2	<2	<2	2.21175	<2	<2
	AARA21_011861	CYP307B1	<2	<2	<2	<2	3.68839	<2	3.72047
	AARA21_012041	GSTD10	<2	11.4425	0.207299	<2	<2	<2	0.129013
	AARA21_012044	CYP6Z3	13.0158	11.2193	<2	18.2222	11.6853	13.9766	9.96192
	AARA21_012130	CYP4H17	5.11035	6.14089	<2	5.54381	2.59838	12.7177	11.5538
	AARA21_012769	CYP9J5	10.0698	8.78945	<2	2.89545	<2	2.16769	2.54732
	AARA21_013007	ns	2.57859	2.42598	<2	2.47536	2.32596	<2	<2
	AARA21_013373	CYP4H19	<2	3.47579	0.20547	<2	<2	<2	<2
	AARA21_013477	CYP6P4	9.07454	21.4323	<2	<2	<2	2.49908	<2
	AARA21_013730	CYP6AH1	<2	<2	2.31524	<2	<2	<2	<2
	AARA21_013832	CYP315A1	<2	<2	0.496974	<2	<2	<2	<2
	AARA21_013904	ns	<2	2.72639	0.313989	3.38818	3.17867	2.01532	<2
	AARA21_013998	CYP6P2	4.39512	<2	2.05823	3.65141	2.28604	2.98288	2.55687
	AARA21_014004	CYP302A1	0.412677	<2	<2	<2	<2	<2	<2
	AARA21_014021	CYP303A1	<2	<2	<2	2.13942	<2	<2	<2
	AARA21_014145	CYP325C1	<2	2.75472	0.368261	6.00659	7.63036	<2	<2
	AARA21_014183	CYP325F1	<2	5.63081	<2	3.62333	3.03391	<2	<2
	AARA21_014435	CYP6AA1	4.85853	4.22106	<2	2.98645	2.42945	3.80901	3.51611
	AARA21_014464	GSTMS2	2.03679	<2	<2	<2	<2	<2	<2
	AARA21_014584	CYP325G1	4.21723	<2	3.43647	<2	2.26694	<2	<2
	AARA21_014632	CYP6AG1	5.49151	4.13651	<2	2.72104	2.53274	2.65083	2.32546
	AARA21_015164	CYP6M2	20.3222	23.9343	<2	4.70123	2.39042	3.42191	2.2272
	AARA21_015582	CYP325H1	2.73931	<2	2.18612	<2	<2	0.294195	0.273213
	AARA21_015646	CYP4H14	2.05826	25.3357	0.186836	<2	<2	<2	<2
Salivary gland	AARA21_001501	D7r3	3.58062	<2	<2	<2	<2	<2	<2
	AARA21_005284	D7L1	2.88187	2.02913	<2	<2	2.88587	3.58433	4.6644
	AARA21_006207	ns	2.88752	<2	<2	<2	<2	<2	<2
	AARA21_006958	D7r4	2.76582	3.16389	<2	2.34639	3.80824	<2	<2
	AARA21_007104	D7L3	<2	<2	<2	4.62045	4.50954	<2	<2
	AARA21_007893	AAPP	2.94122	3.12773	<2	<2	2.33624	<2	<2
	AARA21_009153	ns	<2	0.173753	2.90099	<2	<2	<2	<2
	AARA21_010363	ns	5.38749	2.10832	2.10935	<2	<2	<2	<2
	AARA21_010537	D7L2	<2	<2	<2	<2	<2	2.39479	3.04385
	AARA21_014536	ns	<2	<2	0.46609	2.16868	2.62752	2.59595	2.96396
	AARA21_015474	D7r1	2.27421	2.11981	<2	<2	<2	<2	<2
