# Supplementary material for: Insecticide resistance is driven by distinct metabolic mechanisms across the lifespan of the major malaria vector Anopheles arabiensis
Source: Research Square preprint supplement (doi:10.21203/rs.3.rs-8682736/v1), 2026-02-02
Supplement: Supplementary file 4 [file c02fda07d81568c34e7c2e21.docx]

**Insecticide resistance is driven by distinct metabolic mechanisms across the lifespan of the major malaria vector *Anopheles arabiensis***

Bethanie Pelloquin, Jackline L. Martin, Judatthadei Pantaleo, Edmond Bernard, Austin J. Tang, Nancy Matowo, Ecaterina Edith Vamos, Charlotte Jessop, Noboru Minakawa, Natacha Protopopoff, Louisa A. Messenger

**Supplementary Figures and Tables**

*
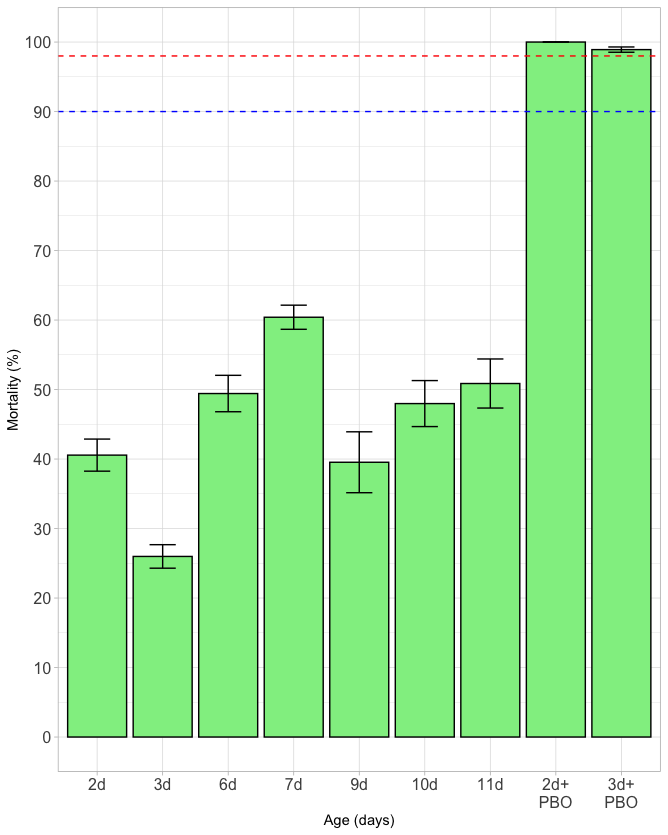
*

**Figure S1.** Average mortality of Anopheles (An.) arabiensis aged 2 to 11 days old following exposure to the diagnostic dose of permethrin in CDC bottle bioassays and of An. arabiensis aged 2-3 days old pre-exposed to PBO before permethrin bioassays. Bars indicate mean mortality after 30 minutes of insecticide exposure across bottle replicates with 95% confidence intervals. The blue dashed line indicates the World Health Organization threshold of 90% mortality, below which a population is considered resistant. The red dashed line indicates 98% mortality, above which indicates susceptibility.


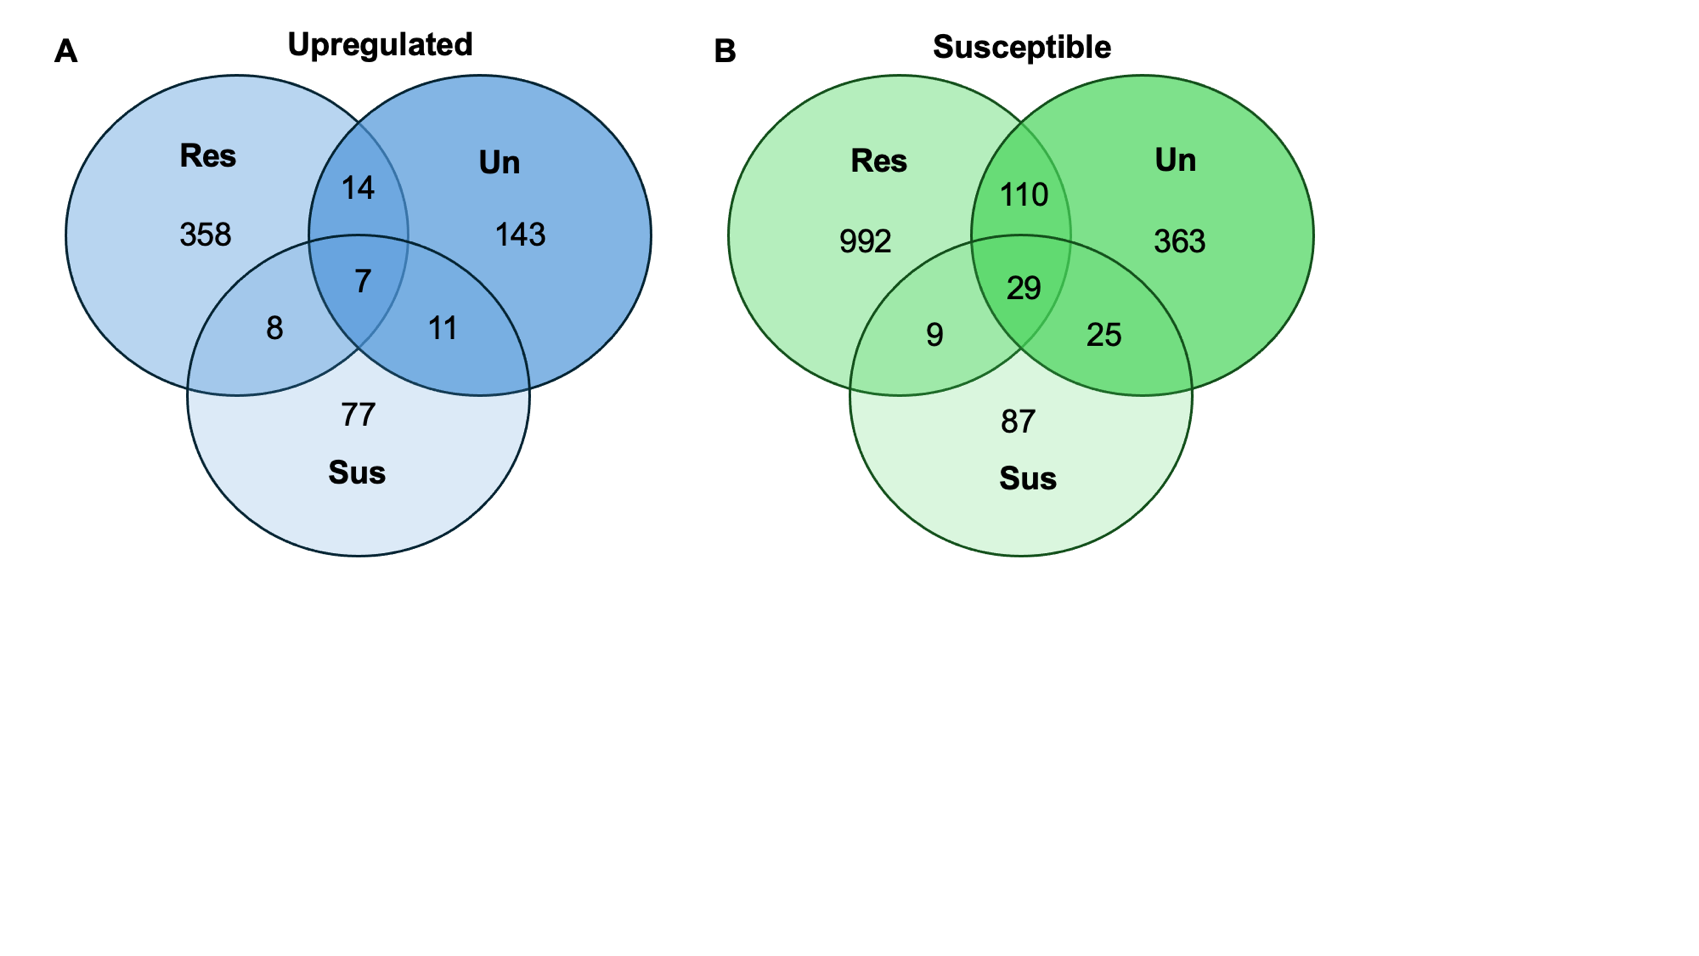


**Figure S2.** Number of upregulated (**A**) and downregulated (**B**) genes in 11d compared with 2-3d An. arabiensis of different phenotypes.


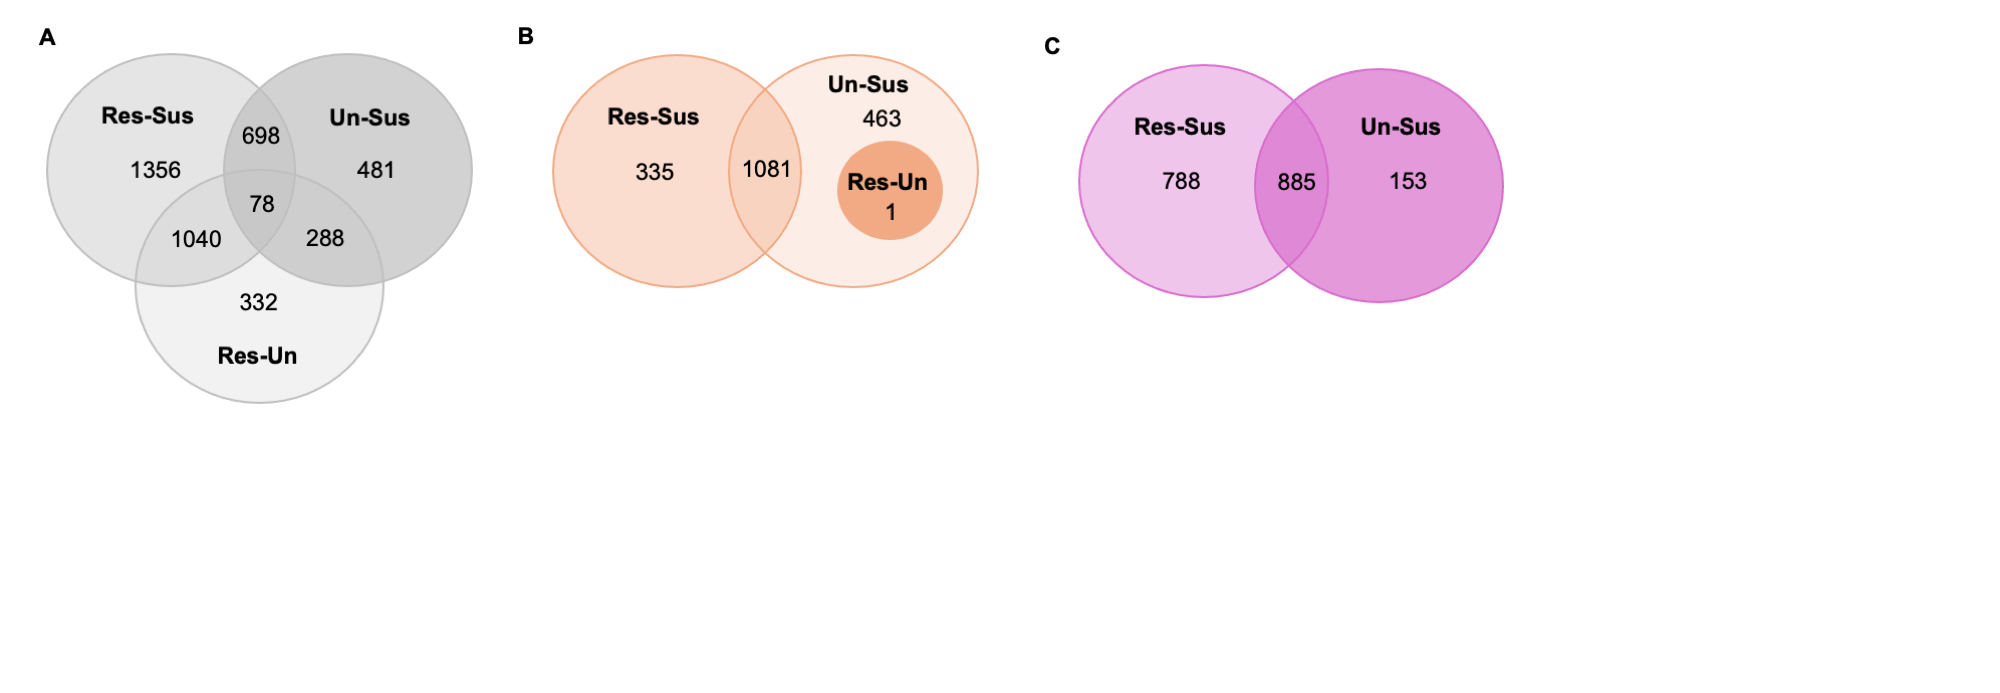


**Figure S3.** Number of significantly differentially expressed genes in 2-3d (**A**), 6d (**B**) and 11d (**C**) Res-Sus, Res-Un and Un-Sus *An. arabiensis.*

**Figure S4.** Comparison of expression levels of differentially expressed genes measured by qRT-PCR and RNA-seq.

**Table S1.** Oligonucleotide primers used for qRT-PCR validation.

| **Gene Description** | **Transcript ID (VectorBase)** | **Forward Primer 5’-3’** | **Reverse Primer 5’-3’** | **Amplicon Size (bp)** | **Primer Efficiency (%)** | **Reference** |
| --- | --- | --- | --- | --- | --- | --- |
| 40S Ribosomal protein S7 | AARA000046 | AGAACCAGCAGACCACCATC | GCTGCAAACTTCGGCTATTC | 98 | 106.7 | Jones et al. 2013; doi: 10.1186/1756-3305-6-343. |
| Ubiquitin | AARA016296 | CGACTCCGTGGTGGTATCAT | GCACTTGCGGCAAATCATCT | 124 | 94.2 | Jones et al. 2013; doi: 10.1186/1756-3305-6-343. |
| CPLCG15 | AGAP008459 | ACGCCAGAATTGTATCCCCG | CGGCTGGTAAGTGTACGGTG | 100 | 107.6 | This study |
| CYP6P3 | AARA015787 | CTGTCTGTACGAGCTGGCAA | GTCGTACGTCACCTCTCCAC | 99 | 108.8 | This study |
| CYP4H17 | AARA011200 | CAACGACTTCGGGCATTTCG | TCCGCTCCCAACATTCCATC | 99 | 106.9 | This study |
| CPR86 | AGAP010103 | GCACTACCATCACGAAGAGGA | CTCCTTCTGGCCGTGAACAT | 99 | 99.6 | This study |
| CYP6Z3 | AARA015795 | CTACCTGTTCTTCCGCCCTG | GTAGACACCGCGATCGTGAA | 99 | 93.8 | This study |
| GSTD7 | AARA009632 | GTGCTGTATTATCTGCCGCC | CCATCACGTTCAGCGCTTTC | 99 | 91.6 | This study |
